# Supplementary material
Source: Research Square preprint supplement (doi:10.21203/rs.3.rs-9986722/v1)
Supplement: Supplementary file 1 [file 5308cf8270b8a8f798572540.pdf]

# Two-electron mediation enables fast alkali peroxide cycling and suppresses side reactions in metal-O<sub>2</sub> cells

Lu He<sup>1,†</sup>, Shuo Wang<sup>1,†</sup>, Xin Xu<sup>1,†</sup>, Soumyadip Mondal<sup>2</sup>, Hongrui He<sup>1</sup>, Rajesh B. Jethwa<sup>2</sup>, Wentao Wang<sup>1</sup>, Kun Wang<sup>3</sup>, Jie Zhang<sup>4</sup>, Weiwei Fang<sup>3</sup>, Wenqing Zhang<sup>1</sup>, Ximei Lv<sup>1</sup>, Fengjiao Yu<sup>1</sup>, Lili Liu<sup>1\*</sup>, Stefan A. Freunberger<sup>2\*</sup>, Yuhui Chen<sup>1\*</sup>

<sup>1</sup>State Key Laboratory of Materials-oriented Chemical Engineering, Nanjing Tech University, Nanjing, China.

<sup>2</sup>Institute of Science and Technology Austria (ISTA); Am Campus 1, 3400 Klosterneuburg, Austria.

<sup>3</sup>Jiangsu Co-Innovation Center of Efficient Processing and Utilization of Forest Resources, International Innovation Center for Forest Chemicals and Materials, College of Chemical Engineering, Nanjing Forestry University, 159 Longpan Road, 210037, Nanjing, China.

<sup>4</sup>School of Chemistry and Chemical Engineering, Hunan University of Science and Technology, Xiangtan, 411201, Hunan, China.

\*Corresponding author. Email: chen@njtech.edu.cn, stefan.freunberger@ist.ac.at

† Authors contributed equally to this work.

## Contents

|                                                                                                 |    |
|-------------------------------------------------------------------------------------------------|----|
| Supplementary Methods                                                                           | 2  |
| Mass spectrometry (MS)                                                                          | 2  |
| Pressure cell                                                                                   | 2  |
| Reaction kinetics                                                                               | 3  |
| Synthesis                                                                                       | 4  |
| Supplementary Figures 1 to 8                                                                    | 9  |
| Supplementary Notes                                                                             | 6  |
| Supplementary Note 1: Characteristic times for reactions with 1- and 2-e <sup>-</sup> mediators | 6  |
| Supplementary Note 2: Ion-pairing controls one- or two-electron quinone reduction               | 7  |
| Supplementary Note 3: DFT study on ion-pairing of DBBQ and DPQ                                  | 10 |
| Supplementary Note 4: Concentration profiles in front of the SECM tip                           | 15 |
| Supplementary References                                                                        | 17 |
| DFT Coordinates                                                                                 | 18 |

## SUPPLEMENTARY METHODS

### Syntheses

#### BuMeDPQ

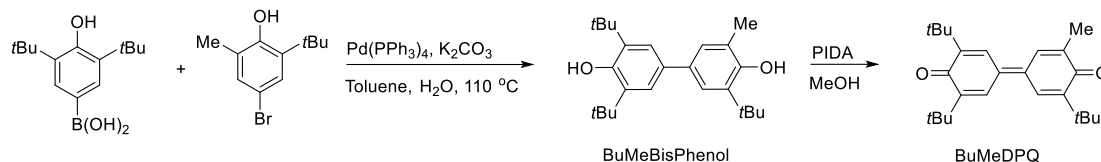

To a flame-dried Ar-filled Schlenk tube containing a magnetic stirring bar, (3,5-di-tert-butyl-4-hydroxyphenyl)boronic acid (2.2 mmol, 550 mg), 4-bromo-2-(tert-butyl)-6-methylphenol (2 mmol, 486 mg),  $\text{Pd}(\text{PPh}_3)_4$  (5 mol%, 150 mg),  $\text{K}_2\text{CO}_3$  (6 mmol, 828 mg) and toluene/ $\text{H}_2\text{O}$  (6 mL/0.6 mL) were added subsequently. The reaction mixture was stirred at  $120\text{ }^\circ\text{C}$  for 12 h. After being cooled to room temperature, the reaction mixture was concentrated under vacuum and directly purified by flash column chromatography (Petroleum Ether: Ethyl Acetate = 5:1) to afford analytically pure product BuMEBisPhenol (203 mg, Yield: 27%).  $^1\text{H}$  NMR (600 MHz,  $\text{CDCl}_3$ ):  $\delta$  = 7.30 (s, 2H), 7.29 (d,  $J$  = 2.1 Hz, 1H), 7.14 (d,  $J$  = 1.9 Hz, 1H), 5.18 (s, 1H), 4.75 (s, 1H), 2.31 (s, 3H), 1.49 (s, 18H), 1.46 (s, 9H). To a flame-dried Schlenk tube containing a magnetic stirring bar, BuMEBisPhenol (0.27 mmol, 100 mg), Phenyliodine(III) diacetate (PIDA, 0.3 mmol, 78.2 mg) and MeOH (3.5 mL) were added subsequently. The reaction mixture was stirred for 12 h. The formed precipitates were washed with diethyl ether and ethanol to afford pure BuMeDPQ product as a red solid (82 mg, Yield: 81%).  $^1\text{H}$  NMR (600 MHz,  $\text{CDCl}_3$ ):  $\delta$  = 7.77 (d,  $J$  = 2.6 Hz, 1H), 7.72 (d,  $J$  = 2.6 Hz, 1H), 7.67 (d,  $J$  = 2.6 Hz, 2H), 2.15 (s, 3H), 1.37 (s, 27H).

#### DiTEMPO

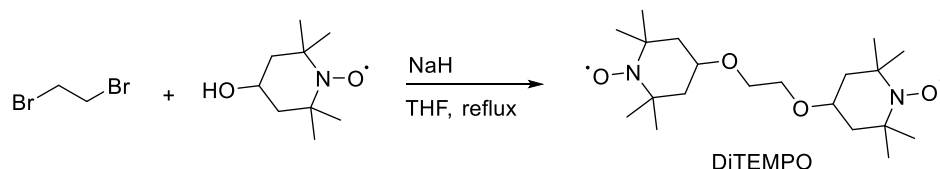

To a flame-dried Ar-filled Schlenk flask containing a magnetic stirring bar, 4-hydroxy-2,2,6,6-tetramethylpiperidine-1-oxyl (40 mmol, 6.4 g) and THF (50 mL) were added under  $\text{N}_2$  atmosphere. The reaction mixture was cooled to  $0\text{ }^\circ\text{C}$ , then, Sodium hydride (60wt% in mineral oil, 60 mmol, 2.4 g) was added portionwise. The mixture was refluxed for 1 h, and cooled to room temperature. Under  $\text{N}_2$  atmosphere, 1,2-dibromoethane (10 mmol, 0.86 mL) was injected via a syringe and the reaction mixture was refluxed overnight. After being cooled to room temperature, the reaction mixture was concentrated under vacuum and directly purified by flash column chromatography to afford analytically pure DiTEMPO as a red solid (1.4 g, Yield: 38%). HR-MS (ESI,  $m/z$ ): calculated for  $\text{C}_{20}\text{H}_{38}\text{N}_2\text{O}_4$  [ $\text{M}$ ] $^{2+}$ : 185.1416. found: 185.1418.

## SUPPLEMENTARY FIGURES

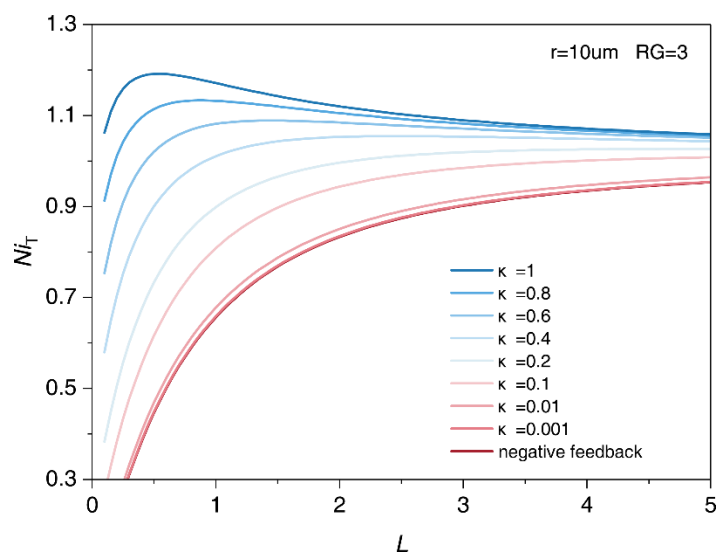

**Supplementary Figure 1** | Theoretical SECM approach curves with various  $\kappa$  from negative approach curve to  $\kappa = 1$ .

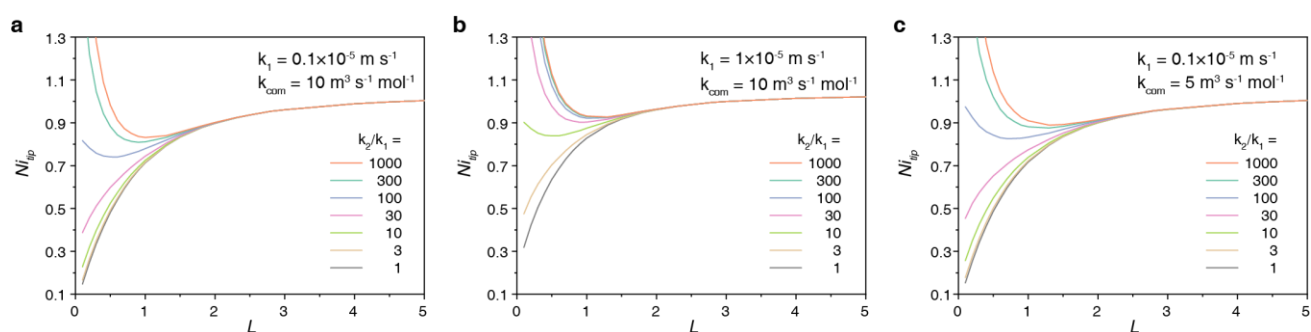

**Supplementary Figure 2** | Fitting of approach curve with a bounced pattern.  $D = 4 \times 10^{-10} \text{ m}^2 \text{ s}^{-1}$ . **a**,  $k_1 = 0.1 \times 10^{-5} \text{ m s}^{-1}$ ,  $k_{\text{com}} = 10 \text{ m}^3 \text{ s}^{-1} \text{ mol}^{-1}$ ; **b**,  $k_1 = 1 \times 10^{-5} \text{ m s}^{-1}$ ,  $k_{\text{com}} = 10 \text{ m}^3 \text{ s}^{-1} \text{ mol}^{-1}$ ; **c**,  $k_1 = 0.1 \times 10^{-5} \text{ m s}^{-1}$ ,  $k_{\text{com}} = 5 \text{ m}^3 \text{ s}^{-1} \text{ mol}^{-1}$

**Supplementary Table 1** | Summary of kinetics for each step in RMs oxidizing  $\text{Li}_2\text{O}_2$ .  $k_1$  and  $k_2$  is the rate of constant of  $\text{RM}^+$  and  $\text{RM}^{2+}$  reacting with  $\text{Li}_2\text{O}_2$ , respectively.  $K_{\text{COMP}}$  is the rate constant of the comproportionation reaction of  $\text{RM} + \text{RM}^{2+} \rightarrow 2\text{RM}^+$ .

|      | $D (\times 10^{-10} \text{ m}^2 \text{ s}^{-1})$ | $k_{\text{app},1} (\times 10^{-5} \text{ m s}^{-1})$ | $k_{\text{app},2} (\times 10^{-5} \text{ m s}^{-1})$ | $K_{\text{COMP}} (\text{m}^3 \text{ s}^{-1} \text{ mol}^{-1})$ | $k_{\text{app},2}/k_{\text{app},1}$ |
|------|--------------------------------------------------|------------------------------------------------------|------------------------------------------------------|----------------------------------------------------------------|-------------------------------------|
| DPAB | 1.76                                             | 0.14                                                 | 23.4                                                 | 10                                                             | 167                                 |
| DMPZ | 4.53                                             | 0.22                                                 | 18.7                                                 | 13                                                             | 85                                  |
| TMPD | 3.89                                             | 0.078                                                | 10.5                                                 | 9.2                                                            | 135                                 |

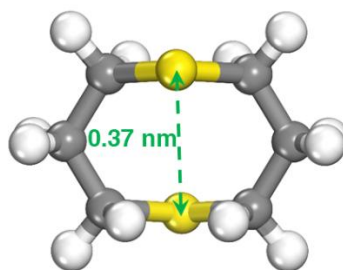

**Supplementary Figure 3** | Molecular structure of 1,5-dithiocane.

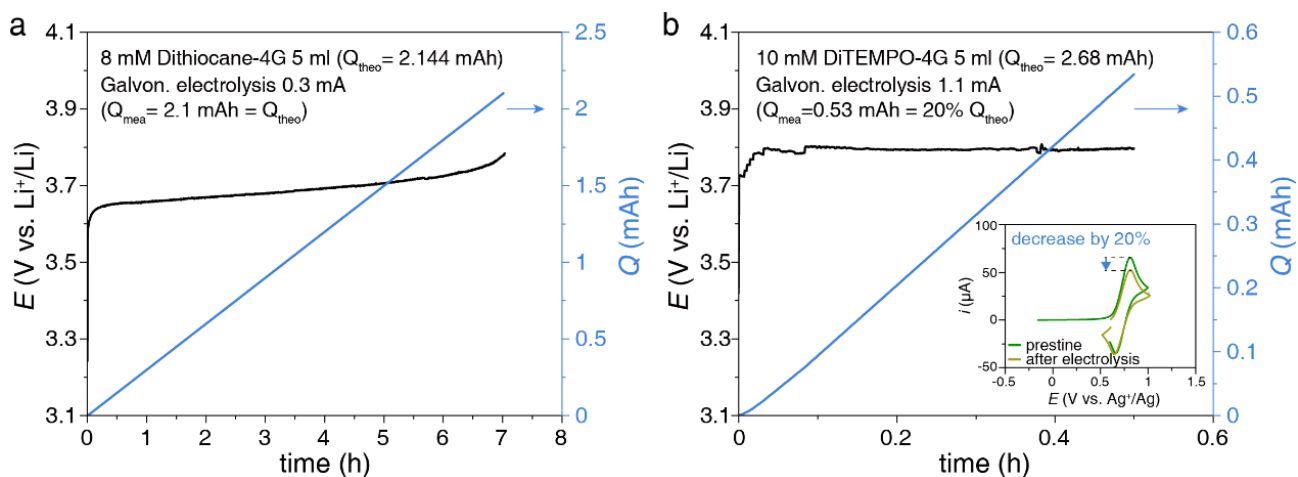

**Supplementary Figure 4** | Coulombic titration of 1,5-dithiocane, which shows its redox peak being a  $2e^-$  process.

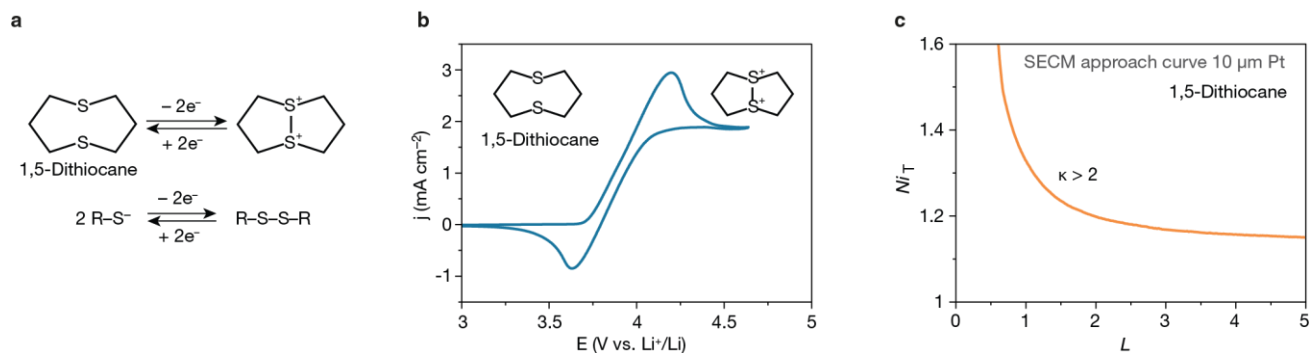

**Supplementary Figure 5** | **a**, The structures of 1,5-dithiocane and its dication in comparison to dithiol/disulphide redox couples. **b**, CV curve of 1,5-dithiocane in  $\text{LiClO}_4\text{-4G}$ . Scan rate:  $50 \text{ mV s}^{-1}$ . **c**, SECM approach curve of 1,5-dithiocane towards an  $\text{Li}_2\text{O}_2$  surface.

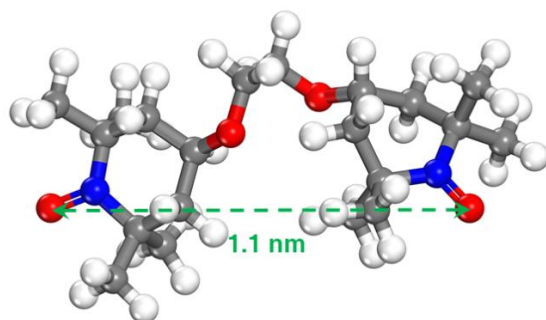

**Supplementary Figure 6** | Molecular structure of DiTEMPO.

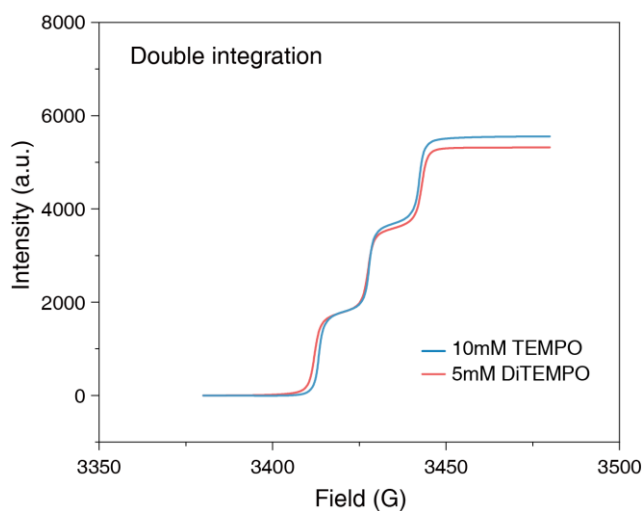

**Supplementary Figure 7** | EPR signal of 5 mM DiTEMPO and 10 mM TEMPO in 4G.

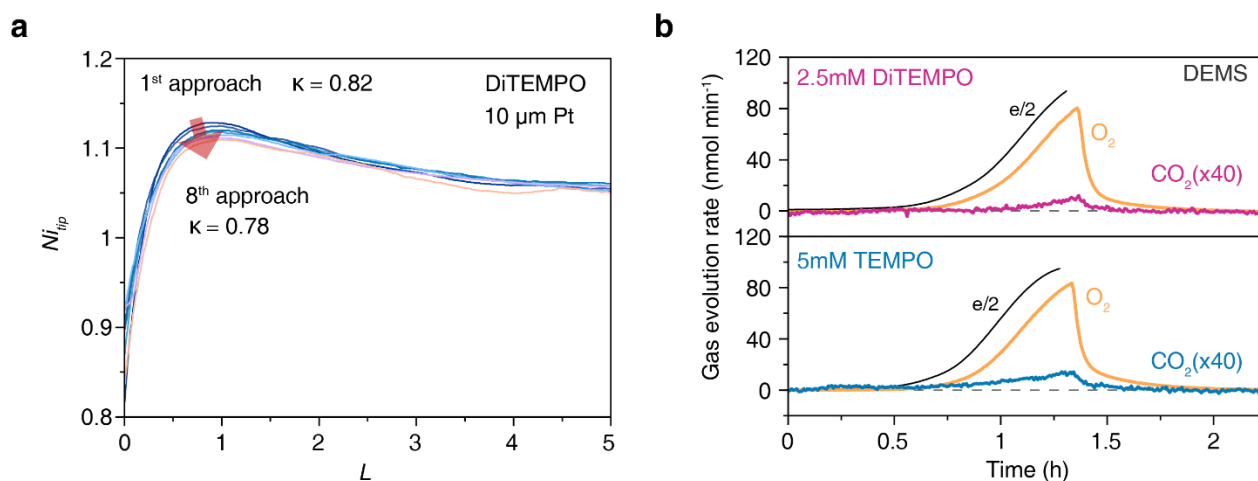

**Supplementary Figure 8** | **a**, Consecutive SECM approach curves of DiTEMPO towards  $\text{Li}_2\text{O}_2$  at a single site, show almost identical kinetics. **b**, Gas evolution of  $\text{Li}_2\text{O}_2$  electro-oxidation process in the electrolyte containing DiTEMPO and TEMPO.

## SUPPLEMENTARY NOTES

### Supplementary Note 1: Characteristic times for reactions with one- and two-electron mediators

Let us consider the reduction of an  $O_2$  molecule to  $Li_2O_2$ . As illustrated in Fig. 1a, two one-electron mediators are required to encounter the specific  $O_2$  moiety to reduce it to  $Li_2O_2$ . Let us assume a RM concentration of 10 mM and that at a certain overpotential the steady state  $RM^-$  concentration is 1 mM. On average one  $RM^-$  is found per  $1/NA = 1.66 \times 10^{-24} m^3$ . Hence, the average distance between  $RM^-$  is  $x_{RMS} = \sqrt[3]{1.66 \times 10^{-24} m^3} \approx 12 nm$ . Diffusion coefficients of typical RMs<sup>5</sup> range between  $1.2 \times 10^{-6} cm^2 s^{-1}$  and  $3.6 \times 10^{-6} cm^2 s^{-1}$ , which gives typical diffusion times  $\tau = x_{RMS}^2/2D$  between  $\sim 200$  and  $600$  ns. Hence a  $Li^+DBBQ^- \cdots O_2$  intermediate will only encounter another  $Li^+DBBQ^- \cdots O_2$  or a  $Li^+DBBQ^-$  every  $\sim 200$  and  $600$  ns, with which it could DISP or be reduced, respectively.

Let us further consider the reduction of  $O_2$  to  $Li_2O_2$  by a  $2 e^-$  RM as illustrated in Fig. 1b. Only a single encounter between  $RM^{2-}$  and  $O_2$  is required. For DPQ Fig. 1a shows a slight positive shift of the reduction wave under  $O_2$  compared to an Ar atmosphere, which suggests coordination between  $Li_2^+DPQ^{2-}$  and  $O_2$  to form  $Li_2^+DPQ^{2-} \cdots O_2$ . Once encountered, the frequency of attempts for electron transfer between  $DPQ^{2-}$  and  $O_2$  may be estimated from Marcus theory<sup>6,7</sup>. Attempts are on the order of nuclear frequencies  $\nu_n$ , for which values are reported between  $\nu_n \approx 3 \times 10^{-10} s^{-1}$  (Ref. <sup>8</sup>) and  $\nu_n \approx 3500 cm^{-1} = 3 \times 10^{-14} s^{-1}$  (Ref. <sup>6</sup>). This translates to attempts for electron transfer every 3.3 ps or less.

## Supplementary Note 2: Ion-pairing controls one- or two-electron quinone reduction

Quinones, which have in principle two  $1 e^-$  reductions, have most widely been used as discharge mediators in Li-O<sub>2</sub> batteries, with DBBQ (2,5-di-tert-butyl-1,4-benzoquinone) having become a standard compound<sup>9</sup>. A typical CV curve for the reduction in ether-based electrolyte (0.3 M LiTFSI in DME) is shown in Supplementary Fig. 9, showing two well-separated reduction waves corresponding to DBBQ/DBBQ<sup>-</sup> and DBBQ<sup>-</sup>/DBBQ<sup>2-</sup>, separated by ~250 mV. At the same conditions, DPQ shows a single  $2 e^-$  reduction wave, corresponding to DPQ/DPQ<sup>2-</sup>. In the following, we examine how redox potentials with non-coordinating cations and ion-pairing give rise to separated or merged redox waves.

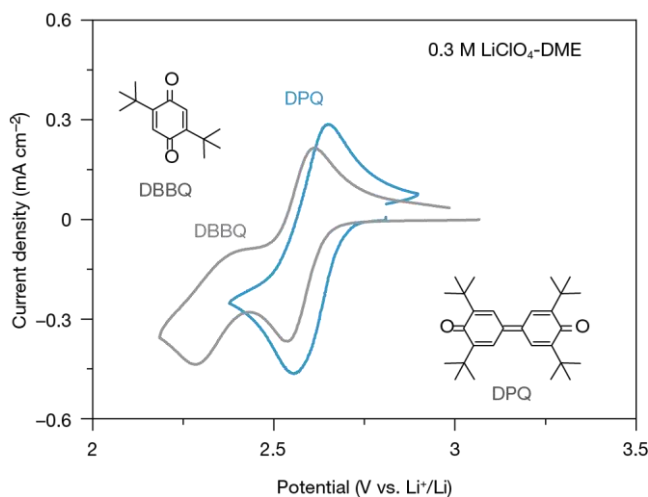

**Supplementary Figure 9 | One- to two-electron quinone reduction in Li<sup>+</sup> electrolyte. a**, CVs of 1 mM DBBQ and DPQ reduction in Ar-saturated 0.3 M LiClO<sub>4</sub> in DME at 100 mV s<sup>-1</sup>.

Supplementary Fig. 10a and b show CVs of DBBQ and DPQ reduction in TBA<sup>+</sup>, Na<sup>+</sup>, and Li<sup>+</sup> electrolytes. Both quinones show in a weakly coordinating TBA<sup>+</sup> electrolyte two well-separated reductions, separated by ~1 V and ~0.5 V for DBBQ and DPQ, respectively<sup>A</sup>. As is typical for weakly solvating non-aqueous electrolytes, ion pairing strongly affects the reduction potentials<sup>12</sup>. While the first reduction wave of DPQ shifts only slightly up, the second reduction wave shifts by ~300 mV each time as one changes the cation from TBA<sup>+</sup> to Na<sup>+</sup> and Li<sup>+</sup>. For the latter the waves merge into a single  $2 e^-$  reduction wave. That the resulting wave represents a  $2 e^-$  reduction wave is supported by observations in accord with established theory<sup>13</sup>: a) a higher peak current compared to the single electron wave, and b) a smaller peak-to-peak separation.

<sup>A</sup> Similar CVs with TBA<sup>+</sup> salt, but different solvents can be found in Refs. 10 Néron, S. et al. Diphenquinones Redux. *J. Org. Chem.* **87**, 7673-7695 (2022); 11 Yin, W. et al. Electrochemical Reduction of CO<sub>2</sub> Mediated by Quinone Derivatives: Implication for Li-CO<sub>2</sub> Battery. *J. Phys. Chem. C* **122**, 6546-6554 (2018).

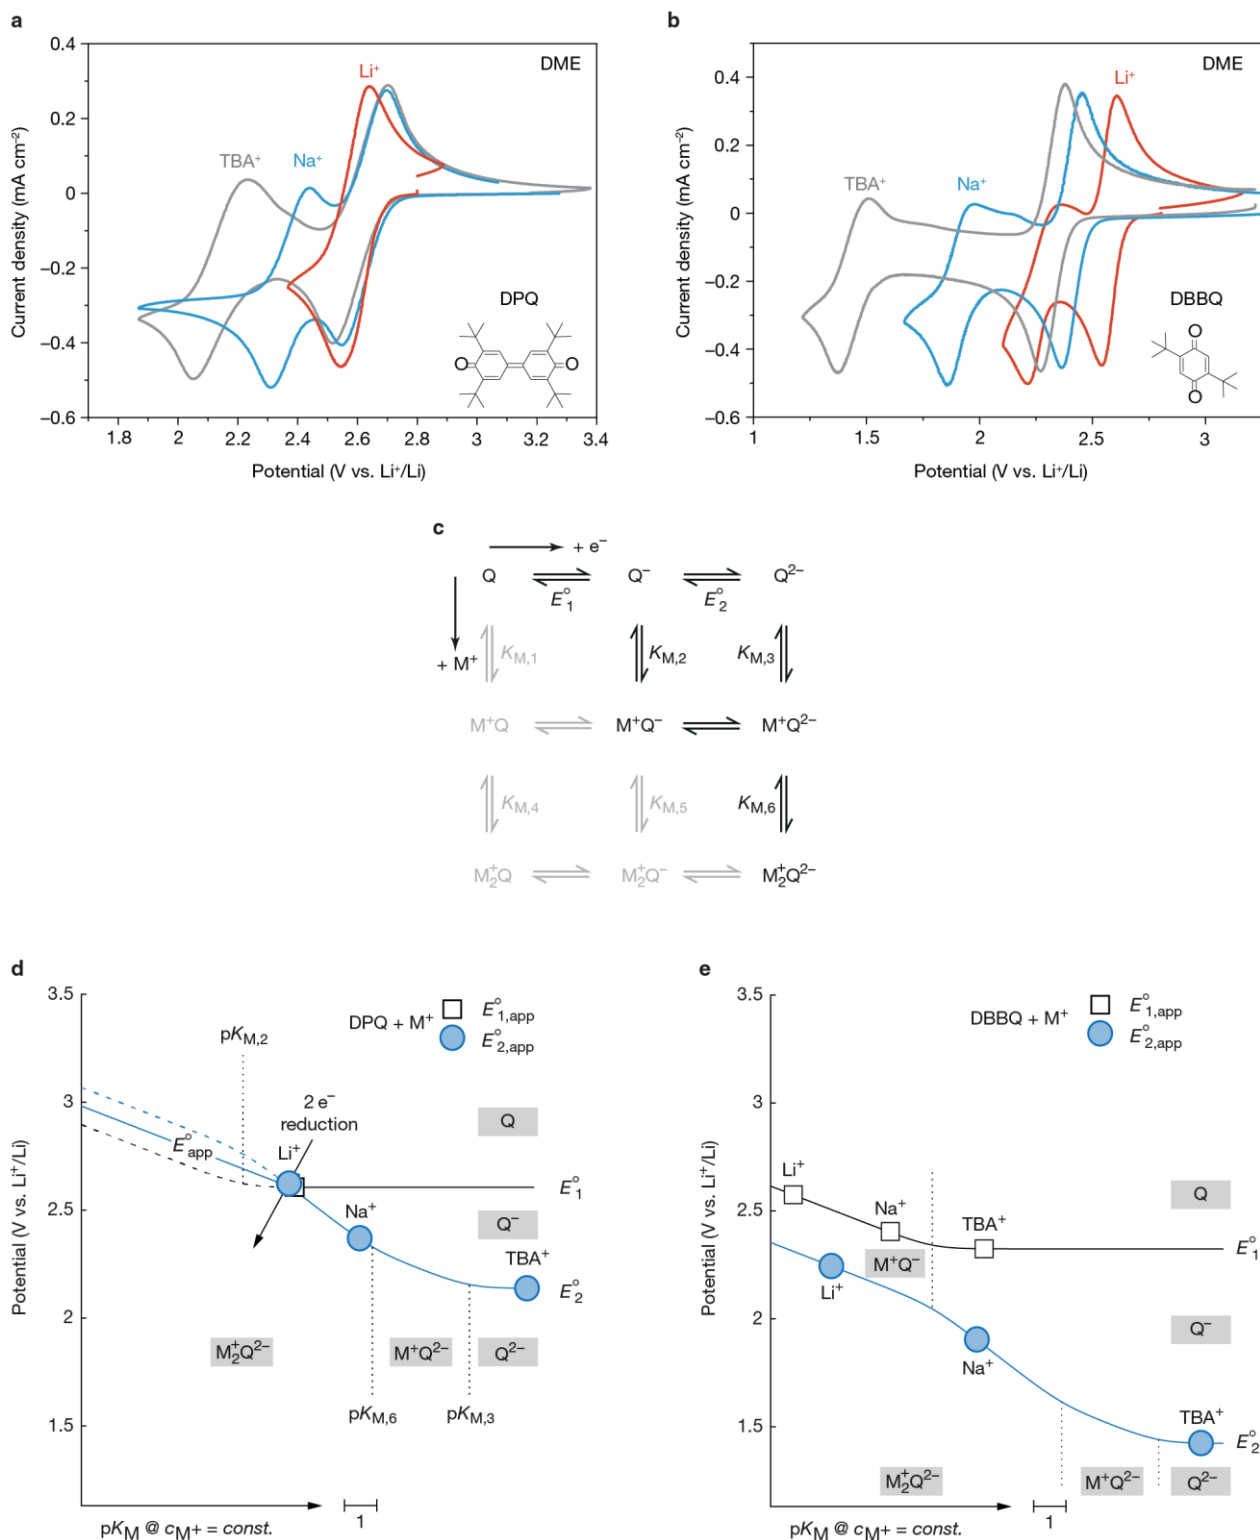

**Supplementary Figure 10 | Ion-pairing controlled shift from one- to two-electron quinone reduction.** **a, b**, CVs of 2 mM DPQ and DBBQ showing their reduction in Ar-saturated DME at 100 mVs<sup>-1</sup>. Salts were 0.3 M LiClO<sub>4</sub>, NaTFSI and TBATFSI. **a** shows nearly unchanged first reduction with TBA<sup>+</sup>, Na<sup>+</sup>, and Li<sup>+</sup> and strongly up-shifting second reduction, which merges for Li<sup>+</sup> in a single wave. **c**, Nine-membered square scheme for quinone reduction with e<sup>-</sup>/M<sup>+</sup> transfers in horizontal/vertical direction, respectively, and the numbering of the Lewis acid-base association equilibria. **d, e**, Pourbaix-type diagram for the quinone reduction potentials versus the Lewis acid-base dissociation equilibrium constant at constant M<sup>+</sup> concentration. The lines are calculated using the Laviron model, wherein the pK<sub>M,n</sub> are assumed (see text).

The peak-merging behaviour may be explained by a nine-membered square scheme (Supplementary Fig. 10c), in which horizontal and vertical processes correspond to electron and cation transfer, respectively. Laviron described a model to calculate the apparent redox potentials versus the pH (Pourbaix diagram) based on the measured equilibrium potentials of the non-coordinated species in the first row (resembling high pH) and the six acid dissociation constants  $pK_{a,n}$ <sup>14,15</sup>. Savéant has shown that ion pairing in non-aqueous media has analogous effects on apparent potentials of 1 e<sup>-</sup> redox couples<sup>12,16</sup>. This is, below the  $pK_{IP}$  ( $K_{IP}$  being the ion-pairing equilibrium constant  $K_{IP} = c_{MA}/(c_{M^+}c_{A^-})$ ), the apparent redox potentials are constant and above  $pK_{IP}$ , the redox potential increases with a slope of 59 mV/ $pK_{IP}$ . We adapted the Laviron model using the formalism of Savéant for the case of quinones undergoing ion-pairing. To retain the typical Pourbaix-type style with more Lewis acidic conditions at the left, we used the Lewis acid-base dissociation constant  $K_M = (c_{M^+}c_{A^-})/c_{MA}$ . Rather than pH, the abscissa is given as  $pK_M$  at a constant  $M^+$  concentration.  $E_{Q^{0/-}}^\circ$  and  $E_{Q^{-/2-}}^\circ$  are the potentials measured using the non-coordinating TBA<sup>+</sup> salt.  $E_{Q^{0/-}}^\circ = E_1^\circ$  and  $E_{Q^{-/2-}}^\circ = E_2^\circ$  are used as a short hand in the plots. Apparent potentials are given by

$$E_{Q^{0/-},app}^\circ = E_3^\circ + \frac{RT}{F} \ln \left( \frac{K_{M,2}/c_{M^+}+1+c_{M^+}/K_{M,5}}{K_{M,1}/c_{M^+}+1+c_{M^+}/K_{M,4}} \right) \quad (S1)$$

$$E_{Q^{-/2-},app}^\circ = E_4^\circ + \frac{RT}{F} \ln \left( \frac{K_{M,3}/c_{M^+}+1+c_{M^+}/K_{M,6}}{K_{M,2}/c_{M^+}+1+c_{M^+}/K_{M,5}} \right) \quad (S2)$$

Where  $E_3^\circ$  and  $E_4^\circ$  are the potentials of the species in the middle row and given by

$$E_3^\circ = E_{Q^{0/-}}^\circ + \frac{2.3RT}{F} (pK_{M,2} - pK_{M,1}) \quad (S3)$$

$$E_4^\circ = E_{Q^{-/2-}}^\circ + \frac{2.3RT}{F} (pK_{M,3} - pK_{M,2}) \quad (S4)$$

The apparent equilibrium potential for cases where  $E_{Q^{-/2-},app}^\circ > E_{Q^{0/-},app}^\circ$  is given by  $E_{app}^\circ = (E_{Q^{0/-},app}^\circ + E_{Q^{-/2-},app}^\circ)/2$ .

While we do not know the  $K_{M,n}$  for a particular quinone and cation, it is fair to assume, analogously to benzoquinone derivatives in aqueous solution<sup>17</sup>, that basicity follows the order  $Q^{2-} > M^+Q^- > Q^-$  and hence  $pK_{M,3} > pK_{M,6} > pK_{M,2}$ . Association to form positively charged complexes ( $pK_{M,1}$ ,  $pK_{M,4}$ ,  $pK_{M,5}$ ) is assumed negligible on the same acidity scale. Supplementary Fig. 10d and e show zones of thermodynamic stability of Q, Q<sup>-</sup>, Q<sup>2-</sup>, M<sup>+</sup>Q<sup>-</sup>, and M<sub>2</sub><sup>+</sup>Q<sup>2-</sup> using assumed  $pK_{M,3}$ ,  $pK_{M,6}$ , and  $pK_{M,2}$  and the measured  $E_{Q^{0/-}}^\circ$  and  $E_{Q^{-/2-}}^\circ$  for DPQ and DBBQ with TBA<sup>+</sup> electrolyte.  $E_{Q^{-/2-},app}^\circ$  has a slope of 2×59 mV/ $pK_{IP}$  between  $pK_{M,3}$  and  $pK_{M,6}$  and a slope of 59 mV/ $pK_{IP}$  below  $pK_{M,6}$ .  $E_{Q^{0/-},app}^\circ$  remains constant above  $pK_{M,2}$  and has a slope of 59 mV/ $pK_{IP}$  below. From Supplementary Fig. 10a we know that  $E_{Q^{0/-},app}^\circ$  for DPQ remains nearly constant with TBA<sup>+</sup>, Na<sup>+</sup> and Li<sup>+</sup> electrolytes, while  $E_{Q^{-/2-},app}^\circ$  increases and merges to a 2 e<sup>-</sup> process with  $E_{app}^\circ$  for Li<sup>+</sup>. By inserting the measured redox potentials of DPQ into the zone diagram, the relative Lewis acid-base dissociation constant  $K_M$  for TBA<sup>+</sup>, Na<sup>+</sup>, and Li<sup>+</sup> can therefore be estimated as shown in Supplementary Fig. 10d. Analogously, Supplementary Fig. 10e shows the zone diagram for DBBQ. At large  $pK_{M,1}$ , measured  $E_{Q^{0/-}}^\circ$  and  $E_{Q^{-/2-}}^\circ$  with Li<sup>+</sup> electrolyte show still two distinct reduction waves, which shows too little association between reduced DBBQ and Li<sup>+</sup> to allow for a direct, concerted 2 e<sup>-</sup>, 2 Li<sup>+</sup> reduction.

### Supplementary Note 3: DFT study on ion-pairing of DBBQ and DPQ

To understand the difference in electrochemical behaviour between DBBQ and DPQ, we undertook a computational study. For lithium, each node of the square-scheme of the cation-coupled electron transfer was calculated with explicit cation inclusion. Supplementary Fig. 11a shows the free energy contour-maps for DBBQ and DPQ. For the gas-phase calculations, the results appear to favour lithium coordination first, followed by reduction, as the energies become more positive as one proceeds towards the top-right corner from the top-left. This is somewhat expected as charge is not screened in the gas-phase and so interactions that dissipate charge are favoured. For the implicit solvent calculations, movement from the top-left towards the bottom-left is disfavoured by an increase in free energy. Movement towards the bottom-right, in contrast, is greatly favoured with a greater driving force (more negative free energy) for DPQ than for DBBQ. This may be due to strain release once reduction facilitates rotation around the central C=C of DPQ as exemplified by the rotation around the central C-C bond in the relaxed structures of reduced DPQ (see Supplementary Fig. 11c).

The relaxed structures in Supplementary Fig. 11b and c also show linear coordination to lithium from the carbonyl groups as DBBQ and DPQ are reduced. This may be because of poor covalency between the oxygen lone-pairs in the carbonyl group and the associated lithium-ion, or because of a poor affinity between the carbonyl groups of the quinone compared to the interaction with the solvent. Supplementary Fig. 12 shows how the O-M distances, C-O-M bend angles and C-C-O-M dihedral angles vary with cation and level of theory. As expected, distance increases as the cation radius increases, the charge density decreases and the cation is unable to approach as closely to the carbonyl groups. Bend angles tend to be closer to 180° for DBBQ with the alkali metal cations, while DPQ appears to facilitate a less linear interaction with sodium cations. For torsional angles, with DBBQ, the cations (other than TMA<sup>+</sup>) are mostly able to occupy the less sterically hindered pocket near the quinoidal protons and away from the *t*-Butyl groups and hence are close to the plane of the aromatic ring in the relaxed structures. This is not possible in DPQ, where the cations (other than hydrogen) relax to positions above or below the ring-planes.

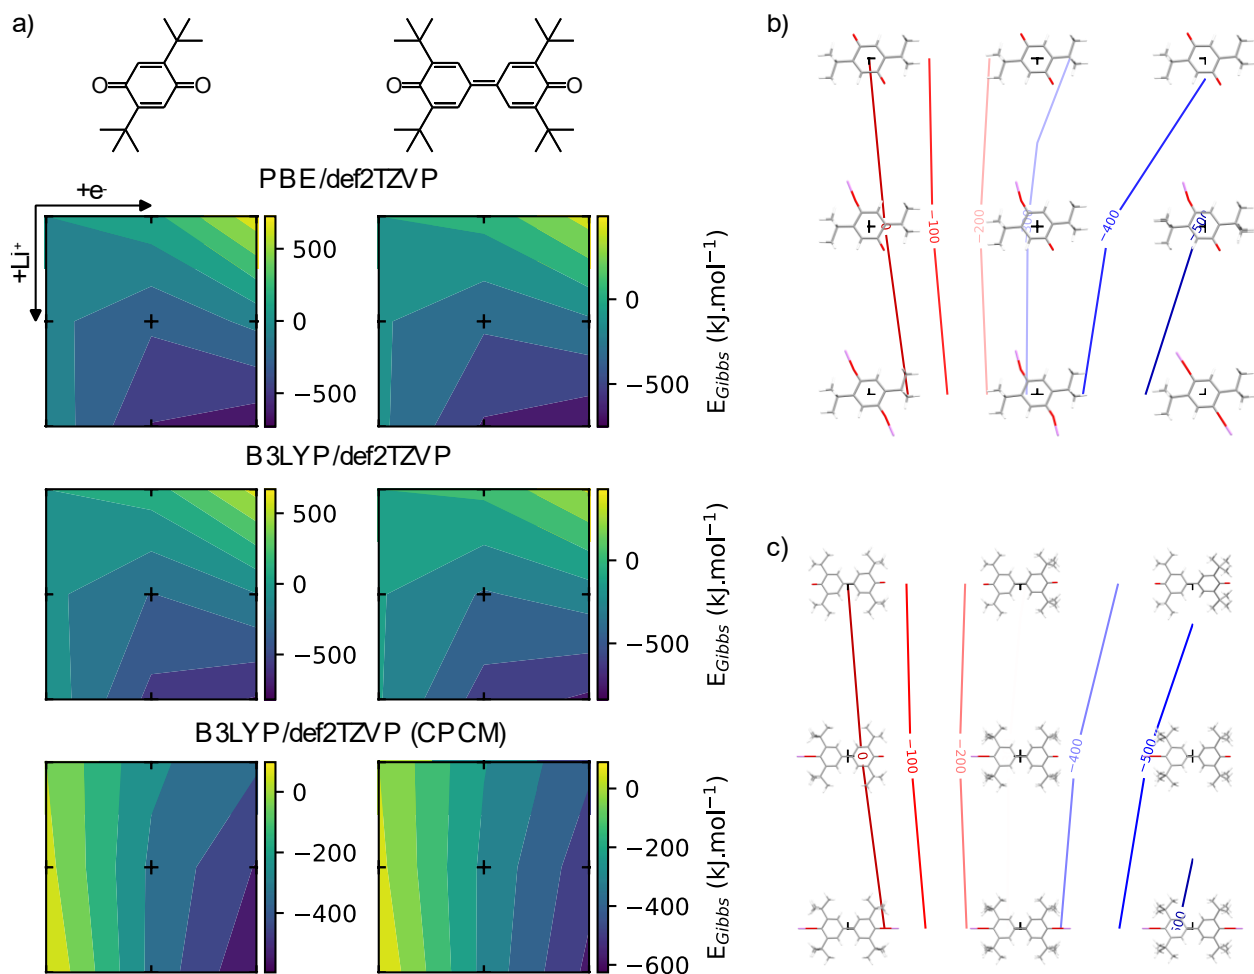

**Supplementary Figure 11 | Gibbs free energy contour maps for the lithium-coupled electron transfer.** The nodes are defined in Supplementary Fig. 10c. **a**, Gibbs free energy contour maps for the lithium-coupled electron transfer of DBBQ (left) and DPQ (right). The skeletal diagrams of DBBQ and DPQ have been included for clarity. As denoted in the figure, a horizontal step corresponds to an electron transfer step, while a vertical step corresponds to the association of a lithium cation. **a**, **b**, Renders of the relaxed structures and contour maps at the B3LYP/def2TZVP (CPCM) level of theory for DBBQ (**b**) and DPQ (**c**), respectively.

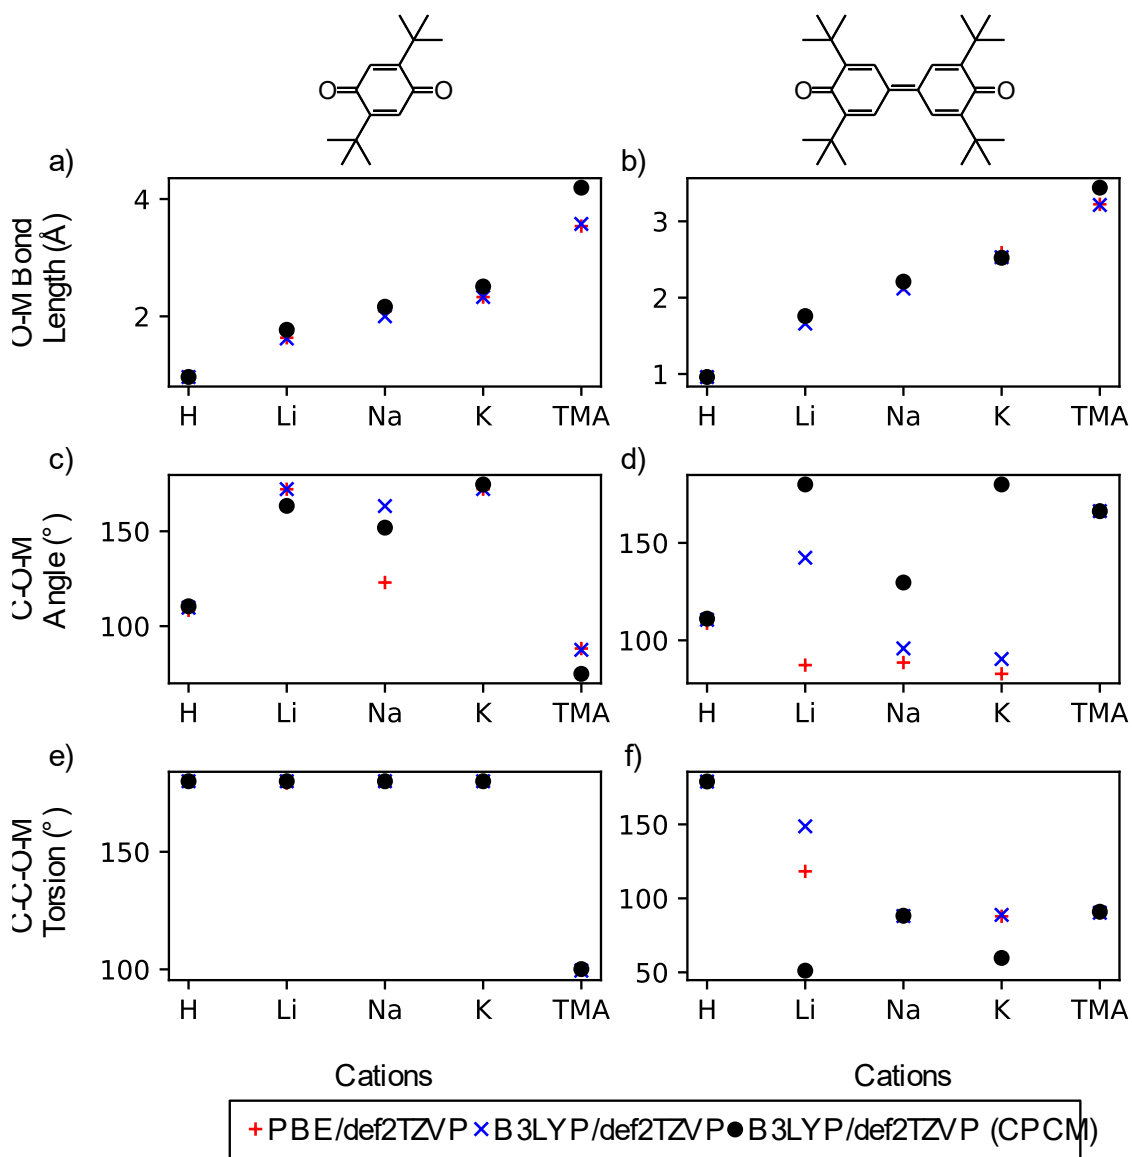

**Supplementary Figure 12 |** Comparison of the O-M bond length, C-O-M bond angle and C-C-O-M dihedral (torsional) angle as a function of cation.

The position and proximity of the cations to the compounds also contributes to the explanation of the observed  $pK_M$ 's. In the case of the calculated values, for both DBBQ and DPQ this broadly follows the expectation that as ionic radius decreases, the strength of the interaction decreases. There is a break in the trend for sodium for DPQ, which may be because of its less linear interaction in the relaxed structure (Supplementary Fig. 12d). Broadly speaking DBBQ appears to have a stronger interaction with all cations than DPQ does (except with sodium). A stronger interaction in the oxidised species would weaken the carbonyl bond and consequently make it easier to reduce (as experimentally observed).

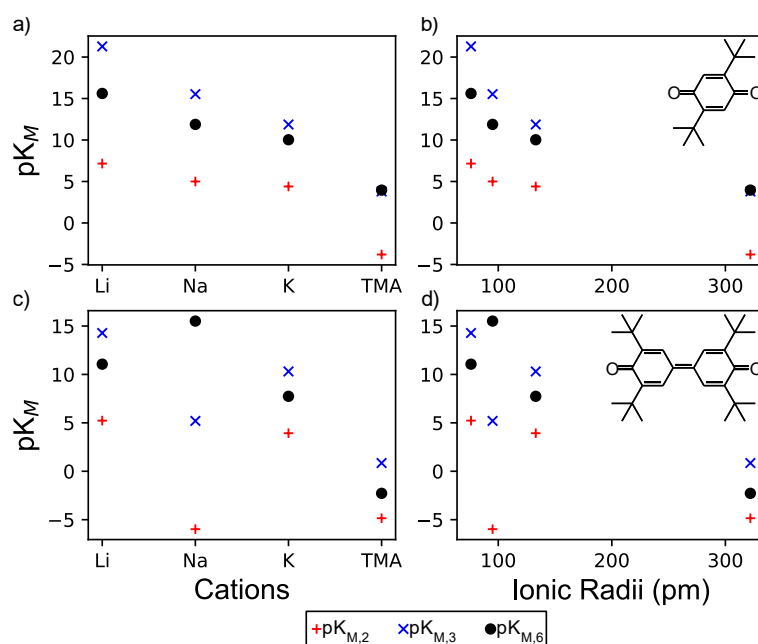

**Supplementary Figure 13** | Calculated  $pK_M$  for DBBQ (a, b) and DPQ (c, d) as a function of cation (left) and ionic radius (right) at the B3LYP/def2TZVP level of theory with implicit solvent (DME via the CPCM model).

When comparing the calculated potentials in Supplementary Table 2, the DFT predicted potentials regrettably do not match the experimental values (see Supplementary Fig. 14) as DBBQ is predicted to undergo reduction at a lower voltage than DPQ, which is the opposite of what is experimentally observed. This may be due to the calculations' insufficiently capturing solvent-solute interactions. However, the trend that DPQ has a narrower potential separation between the first and second reductions is successfully predicted by the calculations, even though the magnitude of the separation is overestimated.

**Supplementary Table 2** | Calculated potentials for the first and second reduction of DBBQ and DPQ using B3LYP/def2TZVP (CPCM, DME) as well as a combination of B3LYP/def2TZVP with single-point SMD solvation at the M062x/def2TZVP.<sup>18</sup>

|             | $Q + e^- \rightarrow Q^-$ (V/SHE) | $Q^- + e^- \rightarrow Q^{2-}$ (V/SHE) | $\Delta E$ (V) |
|-------------|-----------------------------------|----------------------------------------|----------------|
| DBBQ (SMD)  | -1.03                             | -2.68                                  | 1.65           |
| DBBQ (CPCM) | -0.73                             | -2.53                                  | 1.80           |
| DPQ (SMD)   | -0.63                             | -1.57                                  | 0.94           |
| DPQ (CPCM)  | -0.58                             | -1.69                                  | 1.11           |

When considering the frontier molecular orbitals of oxidised DBBQ and oxidised DPQ under implicit solvation (see Supplementary Figure 14a and b), DPQ has a higher energy HOMO and lower-lying LUMO than DPQ. This would suggest that DPQ is a better reductant than DBBQ (though this would require it to be further oxidised) and DPQ is harder to reduce (and consequently should have a lower reduction potential) than DBBQ, which matches up well with the experimental results. Considering the reduced species, DBBQ<sup>•-</sup> has a higher HOMO and LUMO than DPQ<sup>•-</sup>. This is also true for DBBQ<sup>2-</sup> compared to DPQ<sup>2-</sup>. DBBQ<sup>•-</sup> also has a greater energy separation between its frontier orbitals than DPQ<sup>•-</sup> while this is reversed for DPQ<sup>2-</sup> and DBBQ<sup>2-</sup>. The LUMOs of both DBBQ and DPQ (see Supplementary Figure 15) look similar, being localised to the quinoidal rings and containing  $\pi$ -antibonding character for the carbonyl groups.

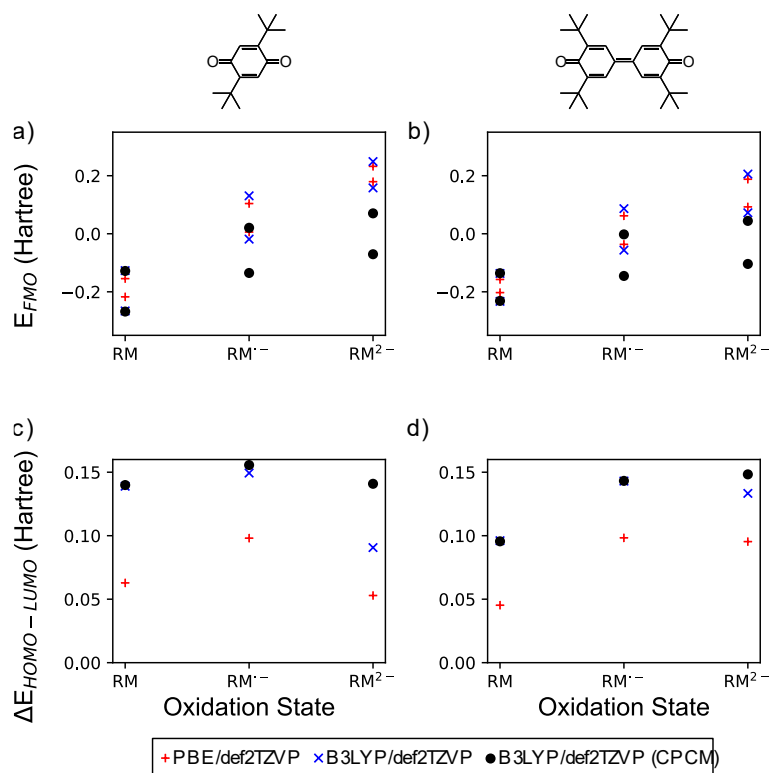

**Supplementary Figure 14 | a, b**, Comparison of the calculated energy levels of the FMO (frontier molecular orbitals), i.e., the HOMO and LUMO as a function of oxidation state of DBBQ (a) and DPQ (b) at various levels of theory as well as the change in energy between the two orbitals (c, d).

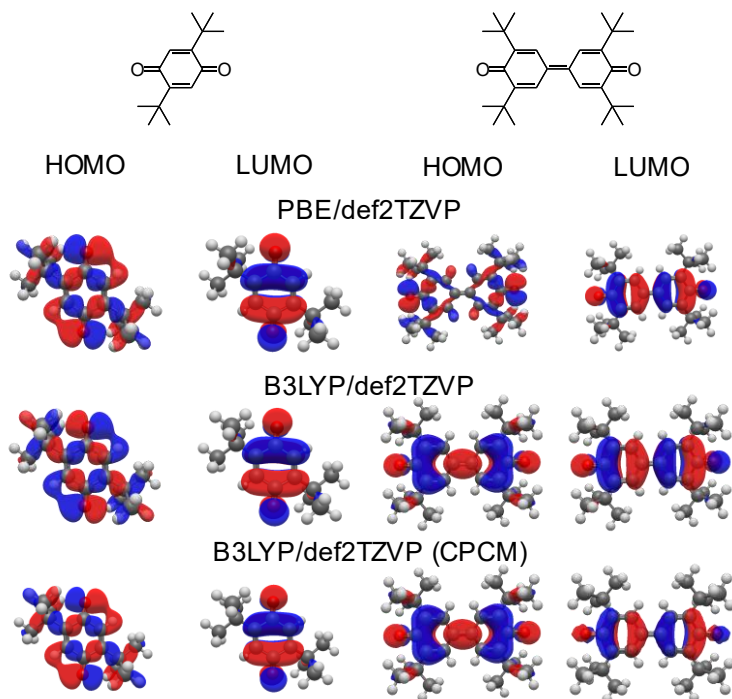

**Supplementary Figure 15 |** Rendered frontier molecular orbitals (FMOs) for DBBQ (left) and DPQ (right) at various levels of theory.

## Supplementary Note 4: Concentration profiles in front of the SECM tip

We have selected three 1+1 e<sup>-</sup> mediators and recorded approach curves with the SECM tip polarized to the first and second plateau respectively. The mediators, their CVs and the potentials used for the approach curves are shown in Supplementary Fig. 17.

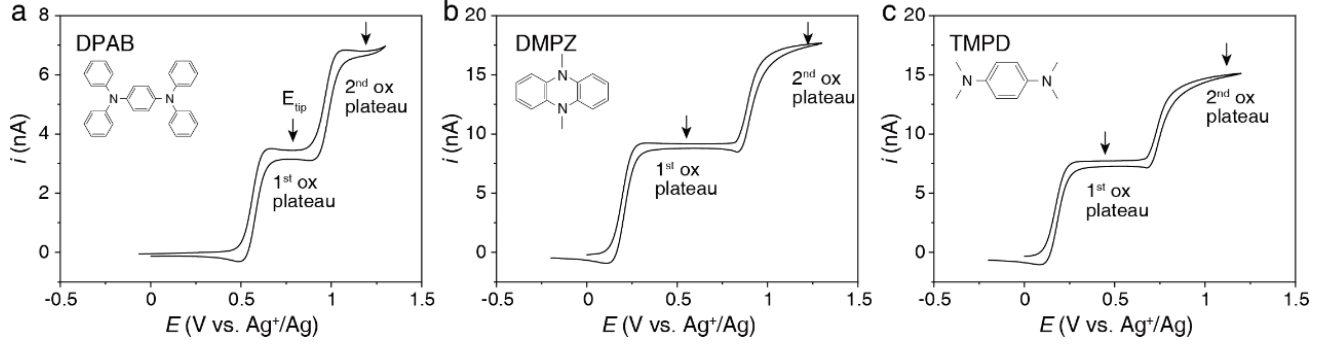

**Supplementary Figure 16 | Cyclic voltammogram of the MBT<sup>-</sup>/MBT<sub>2</sub> redox couple.** CV of (a) DPAB, (b) DMPZ, and (c) TMPD at a SECM tip electrode (radius 10 μm).

To understand the feedback behaviour of the SECM approach curves with 1+1 e<sup>-</sup> RMs, we calculate the concentration profiles of RM, RM<sup>+</sup>, and RM<sup>2+</sup> as a function of distance from the tip based on the formalism described by Compton<sup>13</sup>. The reactions are

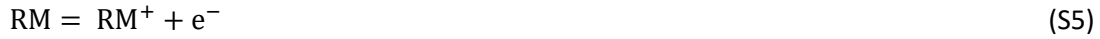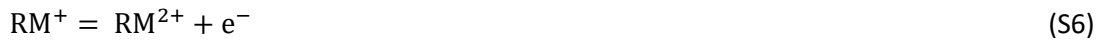

where

$$E_{\text{RM}^{0/+}}^{\circ} \ll E_{\text{RM}^{+/2+}}^{\circ} \quad (\text{S7})$$

hence

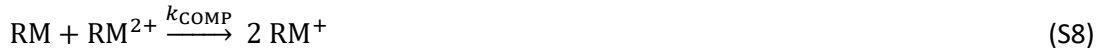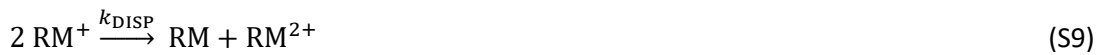

The equilibrium constant of these reactions is given by their relative standard potentials

$$K = \frac{C_{\text{RM}} C_{\text{RM}^{2+}}}{C_{\text{RM}^{+2}}} = \exp\left(\frac{F}{RT} (E_{\text{RM}^{+/2+}}^{\circ} - E_{\text{RM}^{0/+}}^{\circ})\right) = \frac{k_{\text{DISP}}}{k_{\text{COMP}}} \quad (\text{S10})$$

For brevity, we write in the following  $C_{\text{RM}} = A$ ,  $C_{\text{RM}^+} = B$ ,  $C_{\text{RM}^{2+}} = C$ . We consider the tip as a microsphere with the radius  $r_e$ . The coupled reaction-diffusion system in spherical coordinates is given by

$$\frac{\partial A}{\partial t} = D \left( \frac{\partial^2 A}{\partial r^2} + \frac{2}{r} \frac{\partial A}{\partial r} \right) + k_{\text{DISP}} B^2 - k_{\text{COMP}} AC \quad (\text{S11})$$

$$\frac{\partial B}{\partial t} = D \left( \frac{\partial^2 B}{\partial r^2} + \frac{2}{r} \frac{\partial B}{\partial r} \right) - 2k_{\text{DISP}} B^2 + 2k_{\text{COMP}} AC \quad (\text{S12})$$

$$\frac{\partial C}{\partial t} = D \left( \frac{\partial^2 C}{\partial r^2} + \frac{2}{r} \frac{\partial C}{\partial r} \right) + k_{\text{DISP}} B^2 - k_{\text{COMP}} AC \quad (\text{S13})$$

The boundary conditions are with  $A^*$  being the RM bulk concentration

$$t = 0, \text{ all } r: A = A^*, B = C = 0 \quad (\text{S14})$$

$$t > 0, r \rightarrow \infty: A = A^*, B = C = 0 \quad (\text{S15})$$

$$t > 0, r \rightarrow r_e: A = 0, C = A^*, \frac{\partial A}{\partial r} + \frac{\partial B}{\partial r} + \frac{\partial C}{\partial r} = 0 \quad (\text{S16})$$

$u$  transformation with  $u = rA, v = rB, w = rC$  simplifies the system to

$$\frac{\partial u}{\partial t} = D \frac{\partial^2 u}{\partial r^2} + \frac{k_{\text{DISP}}}{r} v^2 - \frac{k_{\text{COMP}}}{r} u w \quad (\text{S17})$$

$$\frac{\partial v}{\partial t} = D \frac{\partial^2 v}{\partial r^2} - \frac{2k_{\text{DISP}}}{r} v^2 + \frac{2k_{\text{COMP}}}{r} u w \quad (\text{S18})$$

$$\frac{\partial w}{\partial t} = D \frac{\partial^2 w}{\partial r^2} + \frac{k_{\text{DISP}}}{r} v^2 - \frac{k_{\text{COMP}}}{r} u w \quad (\text{S19})$$

The boundary conditions become

$$t = 0, \text{all } r: u = rA^*, v = w = 0 \quad (\text{S20})$$

$$t > 0, r \rightarrow \infty: u = rA^*, v = w = 0 \quad (\text{S21})$$

$$t > 0, r \rightarrow r_e: u = 0, w = r_e, \frac{\partial u}{\partial r} + \frac{\partial v}{\partial r} + \frac{\partial w}{\partial r} = \frac{u+v+w}{r} \quad (\text{S22})$$

The solution has been implemented in Matlab using the PDE solver ode15s.

For polarization to the first plateau, only Eq. S5 applies. The governing equation is given by

$$\frac{\partial A}{\partial t} = D \left( \frac{\partial^2 A}{\partial r^2} + \frac{2}{r} \frac{\partial A}{\partial r} \right) \quad (\text{S22})$$

$$\frac{\partial u}{\partial t} = D \frac{\partial^2 u}{\partial r^2} \quad (\text{S23})$$

The latter has for analogous boundary conditions the analytical solution<sup>13</sup>

$$A(r, t) = A^* \left( 1 - \frac{r_e}{r} \operatorname{erfc} \left( \frac{r-r_e}{2\sqrt{Dt}} \right) \right) \quad (\text{S24})$$

For the plots in Fig. 4, we used  $D = 10^{-5} \text{ cm}^2\text{s}^{-1}$ ,  $k_{\text{COMP}} = 10^5$ ,  $r_e = 10 \text{ } \mu\text{m}$ ,  $A^* = 10^{-3} \text{ M}$ . Results for Eq. S11-S13 with  $\Delta E^\circ = 0.4$  are shown in Supplementary Fig. 18.

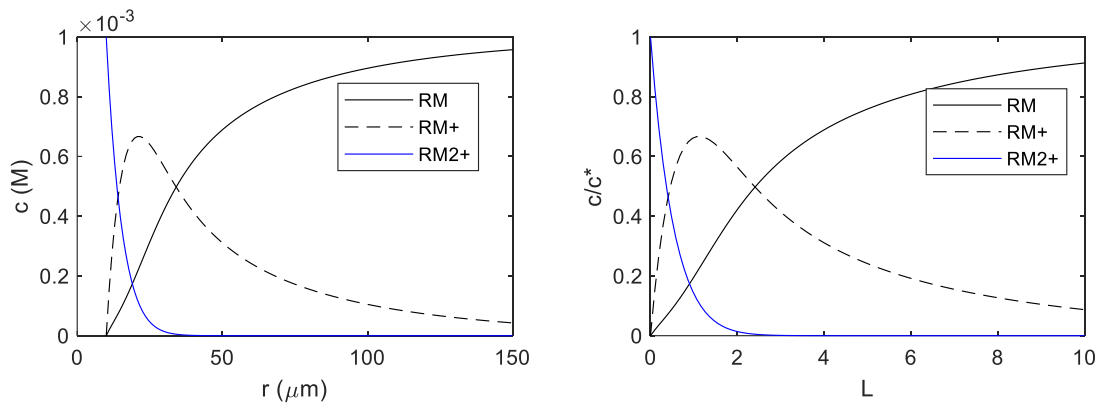

**Supplementary Figure 17** | Normalized concentrations of RM, RM<sup>+</sup>, and RM<sup>2+</sup> as a function of the radius from the dip centre and the normalized distance  $L$ .

## SUPPLEMENTARY REFERENCES

- 1 Peng, Z., Freunberger, S. A., Chen, Y. & Bruce, P. G. A Reversible and Higher-Rate Li-O<sub>2</sub> Battery. *Science* **337**, 563-566 (2012).
- 2 Chen, Y. et al. Li-O<sub>2</sub> Battery with a Dimethylformamide Electrolyte. *J. Am. Chem. Soc.* **134**, 7952-7957 (2012).
- 3 Schafzahl, B. et al. Quantifying Total Superoxide, Peroxide, and Carbonaceous Compounds in Metal-O<sub>2</sub> Batteries and the Solid Electrolyte Interphase. *ACS Energy Lett.* **3**, 170-176 (2017).
- 4 Mahne, N. et al. Singlet oxygen generation as a major cause for parasitic reactions during cycling of aprotic lithium-oxygen batteries. *Nat. Energy* **2**, 17036 (2017).
- 5 Chen, Y., Gao, X., Johnson, L. R. & Bruce, P. G. Kinetics of lithium peroxide oxidation by redox mediators and consequences for the lithium-oxygen cell. *Nat. Commun.* **9**, 767 (2018).
- 6 Piechota, E. J. & Meyer, G. J. Introduction to Electron Transfer: Theoretical Foundations and Pedagogical Examples. *J. Chem. Educ.* **96**, 2450-2466 (2019).
- 7 Marcus, R. A. & Sutin, N. Electron transfers in chemistry and biology. *Biochim. Biophys. Acta* **811**, 265-322 (1985).
- 8 Feldberg, S. W. & Sutin, N. Distance dependence of heterogeneous electron transfer through the nonadiabatic and adiabatic regimes. *Chem. Phys.* **324**, 216-225 (2006).
- 9 Gao, X., Chen, Y., Johnson, L. & Bruce, P. G. Promoting solution phase discharge in Li-O<sub>2</sub> batteries containing weakly solvating electrolyte solutions. *Nat. Mater.* **15**, 882-888 (2016).
- 10 Néron, S. et al. Diphenylquinones Redux. *J. Org. Chem.* **87**, 7673-7695 (2022).
- 11 Yin, W. et al. Electrochemical Reduction of CO<sub>2</sub> Mediated by Quinone Derivatives: Implication for Li-CO<sub>2</sub> Battery. *J. Phys. Chem. C* **122**, 6546-6554 (2018).
- 12 Savéant, J.-M. Effect of Ion Pairing on the Mechanism and Rate of Electron Transfer. *Electrochemical Aspects. J. Phys. Chem. B* **105**, 8995-9001 (2001).
- 13 Compton, R. G. & Banks, C. E. *Understanding Voltammetry*. (Imperial College Press, 2010).
- 14 Laviron, E. Electrochemical reactions with protonations at equilibrium: Part VIII. The 2 e<sup>-</sup>, 2 H<sup>+</sup> reaction (nine-member square scheme) for a surface or for a heterogeneous reaction in the absence of disproportionation and dimerization reactions. *J. Electroanal. Chem.* **146**, 15-36 (1983).
- 15 Laviron, E. Electrochemical reactions with protonations at equilibrium: Part XII. The 2 e<sup>-</sup>, 2 H<sup>+</sup> homogeneous isotopic electron exchange reaction (nine-member square scheme). *J. Electroanal. Chem.* **169**, 29-46 (1984).
- 16 Savéant, J.-M. Evidence for Concerted Pathways in Ion-Pairing Coupled Electron Transfers. *J. Am. Chem. Soc.* **130**, 4732-4741 (2008).
- 17 Wang, W., Balland, V., Branca, M. & Limoges, B. A Unified Charge Storage Mechanism to Rationalize the Electrochemical Behavior of Quinone-Based Organic Electrodes in Aqueous Rechargeable Batteries. *J. Am. Chem. Soc.* **146**, 15230-15250 (2024).
- 18 de la Cruz, C. et al. New insights into phenazine-based organic redox flow batteries by using high-throughput DFT modelling. *Sustain. Energy Fuels* **4**, 5513-5521 (2020).

# Supporting Information – DFT Coordinates

DBBQ

Cation-Free

Oxidised

PBE/def2TZVP

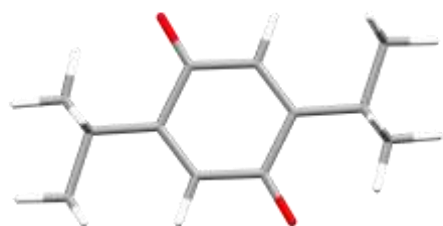

| <i>Element</i> | <i>X</i> | <i>Y</i> | <i>Z</i> |
|----------------|----------|----------|----------|
| C              | 3.274685 | 9.385517 | 6.779338 |
| C              | 7.422635 | 6.437469 | 6.779379 |
| C              | 6.089107 | 8.908684 | 6.779259 |
| C              | 5.945342 | 6.490799 | 6.779437 |
| C              | 7.5664   | 8.855354 | 6.779204 |
| C              | 3.189583 | 7.232138 | 5.513872 |
| C              | 3.18968  | 7.232313 | 8.045107 |
| C              | 10.23705 | 5.960632 | 6.779277 |
| C              | 10.32217 | 8.114007 | 8.04475  |
| C              | 5.271293 | 7.831161 | 6.779368 |
| C              | 8.240449 | 7.514992 | 6.779264 |
| C              | 3.749381 | 7.924357 | 6.779421 |
| C              | 9.762361 | 7.421793 | 6.779203 |
| C              | 10.32205 | 8.113841 | 5.513514 |
| H              | 3.578525 | 7.710227 | 4.602407 |
| H              | 3.448344 | 6.167614 | 5.492432 |
| H              | 3.448441 | 6.167792 | 8.066675 |
| H              | 2.093291 | 7.326103 | 5.503598 |
| H              | 11.41846 | 8.020038 | 8.055017 |
| H              | 3.617495 | 9.930333 | 7.671718 |
| H              | 2.093389 | 7.326281 | 8.055453 |
| H              | 2.175642 | 9.406999 | 6.779384 |
| H              | 3.617418 | 9.930208 | 5.886854 |
| H              | 3.578691 | 7.710527 | 8.956478 |
| H              | 7.808594 | 5.417058 | 6.779438 |
| H              | 9.894316 | 5.415937 | 7.671757 |

|   |          |          |          |
|---|----------|----------|----------|
| H | 9.894244 | 5.415823 | 5.886893 |
| H | 11.41835 | 8.019872 | 5.503161 |
| H | 9.933037 | 7.635629 | 4.602145 |
| H | 10.06329 | 9.178362 | 5.49195  |
| H | 10.06341 | 9.178532 | 8.066196 |
| H | 5.703148 | 9.929095 | 6.779204 |
| H | 9.933232 | 7.635916 | 8.956216 |
| H | 11.3361  | 5.939147 | 6.779234 |
| O | 5.315867 | 5.429195 | 6.779539 |
| O | 8.195874 | 9.916958 | 6.77911  |

B3LYP/def2TZVP

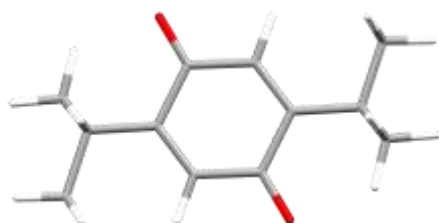

| <i>Element</i> | <i>X</i> | <i>Y</i> | <i>Z</i> |
|----------------|----------|----------|----------|
| C              | 3.272122 | 9.383458 | 6.779346 |
| C              | 7.425609 | 6.441325 | 6.779369 |
| C              | 6.086132 | 8.904825 | 6.779257 |
| C              | 5.947653 | 6.497621 | 6.779428 |
| C              | 7.564088 | 8.848529 | 6.779199 |
| C              | 3.193401 | 7.234115 | 5.514987 |
| C              | 3.193502 | 7.234279 | 8.043991 |
| C              | 10.23962 | 5.962692 | 6.779287 |
| C              | 10.31834 | 8.112042 | 8.043634 |
| C              | 5.274409 | 7.83726  | 6.779365 |
| C              | 8.237333 | 7.50889  | 6.779263 |
| C              | 3.751736 | 7.924634 | 6.779422 |
| C              | 9.760006 | 7.421516 | 6.779204 |
| C              | 10.31824 | 8.111863 | 5.51463  |
| H              | 3.580467 | 7.710535 | 4.611483 |
| H              | 3.449634 | 6.178078 | 5.490412 |
| H              | 3.449742 | 6.178247 | 8.068687 |
| H              | 2.105289 | 7.325973 | 5.502806 |
| H              | 11.40646 | 8.020196 | 8.055804 |
| H              | 3.611092 | 9.924423 | 7.665095 |
| H              | 2.10539  | 7.326133 | 8.056243 |
| H              | 2.181394 | 9.402109 | 6.779387 |
| H              | 3.611024 | 9.92431  | 5.893503 |
| H              | 3.580634 | 7.710821 | 8.947402 |

|   |          |          |          |
|---|----------|----------|----------|
| H | 7.801636 | 5.427858 | 6.779422 |
| H | 9.900729 | 5.421848 | 7.66514  |
| H | 9.900639 | 5.421718 | 5.893548 |
| H | 11.40635 | 8.019998 | 5.502368 |
| H | 9.93109  | 7.635325 | 4.611223 |
| H | 10.06201 | 9.167899 | 5.489935 |
| H | 10.0621  | 9.168077 | 8.068211 |
| H | 5.710106 | 9.918292 | 6.779203 |
| H | 9.931293 | 7.635619 | 8.947141 |
| H | 11.33035 | 5.944042 | 6.779233 |
| O | 5.324038 | 5.448752 | 6.779525 |
| O | 8.187704 | 9.897398 | 6.779098 |

B3LYP/def2TZVP (CPCM - DME)

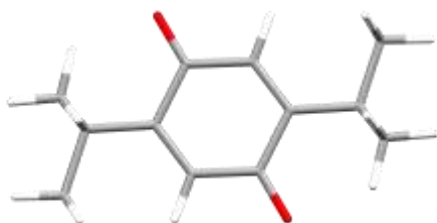

| <i>Element</i> | <i>X</i>    | <i>Y</i>    | <i>Z</i>    |
|----------------|-------------|-------------|-------------|
| C              | 3.272926482 | 9.382704653 | 6.779345827 |
| C              | 7.427853823 | 6.443186396 | 6.779371289 |
| C              | 6.083887842 | 8.902963618 | 6.779255217 |
| C              | 5.951314369 | 6.498125805 | 6.779431684 |
| C              | 7.560427297 | 8.84802421  | 6.779195988 |
| C              | 3.191617337 | 7.235278933 | 5.514078518 |
| C              | 3.191720455 | 7.235444965 | 8.044901298 |
| C              | 10.23881517 | 5.963445346 | 6.779283504 |
| C              | 10.32012567 | 8.110875207 | 8.044543706 |
| C              | 5.273671488 | 7.83430519  | 6.779365171 |
| C              | 8.238070178 | 7.511844823 | 6.779261224 |
| C              | 3.751203644 | 7.923218537 | 6.779421991 |
| C              | 9.760538022 | 7.422931466 | 6.779203061 |
| C              | 10.32001989 | 8.110700883 | 5.513720925 |
| H              | 3.579557195 | 7.71303374  | 4.611906953 |
| H              | 3.446862234 | 6.178921947 | 5.486398232 |
| H              | 3.446969663 | 6.179092203 | 8.072700762 |
| H              | 2.10375728  | 7.328492707 | 5.504055532 |
| H              | 11.40798587 | 8.017662902 | 8.054565015 |
| H              | 3.613038059 | 9.922335974 | 7.665288969 |
| H              | 2.103861049 | 7.328657751 | 8.054999198 |

|   |             |             |             |
|---|-------------|-------------|-------------|
| H | 2.182269265 | 9.400649393 | 6.779387407 |
| H | 3.612968477 | 9.92222082  | 5.893305889 |
| H | 3.579731503 | 7.713319763 | 8.946978693 |
| H | 7.808715487 | 5.431745054 | 6.779426021 |
| H | 9.898775056 | 5.423932386 | 7.665326118 |
| H | 9.898701697 | 5.423810825 | 5.893343039 |
| H | 11.40787915 | 8.017486599 | 5.503621349 |
| H | 9.932006597 | 7.632824182 | 4.611645502 |
| H | 10.06477203 | 9.167053908 | 5.48591908  |
| H | 10.06487945 | 9.167231935 | 8.072221616 |
| H | 5.703026177 | 9.91440496  | 6.779199424 |
| H | 9.932188045 | 7.63312231  | 8.946717241 |
| H | 11.32947239 | 5.945500594 | 6.77923968  |
| O | 5.329295804 | 5.445336287 | 6.779529013 |
| O | 8.182445859 | 9.900813728 | 6.779095864 |

*Singly Reduced*

PBE/def2TZVP

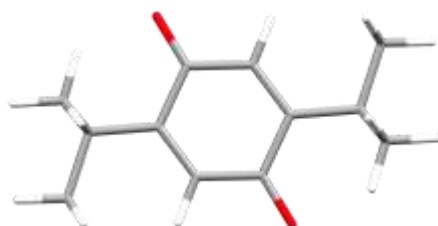

| <i>Element</i> | <i>X</i> | <i>Y</i> | <i>Z</i> |
|----------------|----------|----------|----------|
| C              | 3.302251 | 9.383298 | 6.779348 |
| C              | 7.376386 | 6.4422   | 6.779372 |
| C              | 6.135355 | 8.90395  | 6.779245 |
| C              | 5.92775  | 6.47432  | 6.779427 |
| C              | 7.583992 | 8.87183  | 6.779183 |
| C              | 3.207441 | 7.232753 | 5.519652 |
| C              | 3.207551 | 7.232913 | 8.039326 |
| C              | 10.20949 | 5.962852 | 6.779286 |
| C              | 10.3043  | 8.113404 | 8.038972 |
| C              | 5.307766 | 7.80217  | 6.779361 |
| C              | 8.203976 | 7.54398  | 6.779257 |
| C              | 3.77835  | 7.922415 | 6.77942  |
| C              | 9.733391 | 7.423735 | 6.779205 |
| C              | 10.3042  | 8.113231 | 5.519297 |
| H              | 3.580094 | 7.728777 | 4.609677 |
| H              | 3.514952 | 6.179513 | 5.49905  |
| H              | 3.515063 | 6.179676 | 8.060035 |

|   |          |          |          |
|---|----------|----------|----------|
| H | 2.105011 | 7.291091 | 5.51675  |
| H | 11.40672 | 8.055066 | 8.04188  |
| H | 3.653533 | 9.927029 | 7.669603 |
| H | 2.105122 | 7.291252 | 8.042317 |
| H | 2.200319 | 9.408569 | 6.779395 |
| H | 3.653454 | 9.926916 | 5.888994 |
| H | 3.580283 | 7.729053 | 8.949205 |
| H | 7.783766 | 5.428358 | 6.779432 |
| H | 9.858283 | 5.419238 | 7.669642 |
| H | 9.858213 | 5.419116 | 5.889032 |
| H | 11.40663 | 8.054892 | 5.516312 |
| H | 9.931468 | 7.617086 | 4.60942  |
| H | 9.996684 | 9.166467 | 5.498582 |
| H | 9.996785 | 9.166643 | 8.059567 |
| H | 5.727976 | 9.917792 | 6.779191 |
| H | 9.931638 | 7.617384 | 8.948947 |
| H | 11.31142 | 5.937581 | 6.779244 |
| O | 5.264074 | 5.384845 | 6.779546 |
| O | 8.247667 | 9.961305 | 6.779077 |

B3LYP/def2TZVP

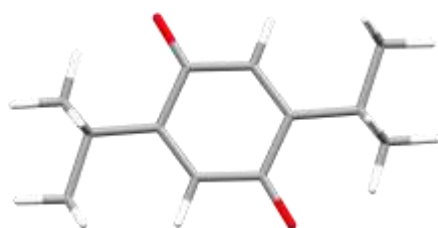

| <i>Element</i> | <i>X</i> | <i>Y</i> | <i>Z</i> |
|----------------|----------|----------|----------|
| C              | 3.304116 | 9.378069 | 6.779346 |
| C              | 7.377773 | 6.448644 | 6.779358 |
| C              | 6.133969 | 8.897508 | 6.779251 |
| C              | 5.933801 | 6.48152  | 6.779409 |
| C              | 7.577941 | 8.864632 | 6.779184 |
| C              | 3.210042 | 7.233158 | 5.520125 |
| C              | 3.210158 | 7.233326 | 8.038862 |
| C              | 10.20762 | 5.96808  | 6.779289 |
| C              | 10.30169 | 8.112997 | 8.038503 |
| C              | 5.312209 | 7.802276 | 6.779358 |
| C              | 8.199533 | 7.543876 | 6.779252 |
| C              | 3.783135 | 7.918411 | 6.779421 |
| C              | 9.728607 | 7.42774  | 6.779204 |
| C              | 10.3016  | 8.112818 | 5.519765 |
| H              | 3.583665 | 7.724965 | 4.618004 |

|   |          |          |          |
|---|----------|----------|----------|
| H | 3.503861 | 6.18603  | 5.493441 |
| H | 3.503977 | 6.186201 | 8.065658 |
| H | 2.116326 | 7.29949  | 5.515848 |
| H | 11.3954  | 8.046661 | 8.04279  |
| H | 3.651136 | 9.917919 | 7.663033 |
| H | 2.116443 | 7.299661 | 8.043231 |
| H | 2.210527 | 9.401879 | 6.779398 |
| H | 3.651049 | 9.9178   | 5.895552 |
| H | 3.583864 | 7.725253 | 8.940884 |
| H | 7.778229 | 5.443053 | 6.779412 |
| H | 9.860678 | 5.428353 | 7.663081 |
| H | 9.860613 | 5.428228 | 5.8956   |
| H | 11.39531 | 8.046483 | 5.515407 |
| H | 9.927898 | 7.620887 | 4.617743 |
| H | 10.00778 | 9.159943 | 5.492961 |
| H | 10.00787 | 9.160126 | 8.065179 |
| H | 5.733513 | 9.903099 | 6.779206 |
| H | 9.928056 | 7.621195 | 8.940623 |
| H | 11.30121 | 5.944269 | 6.779251 |
| O | 5.276755 | 5.399605 | 6.77952  |
| O | 8.234986 | 9.946547 | 6.779099 |

B3LYP/def2TZVP (CPCM – DME)

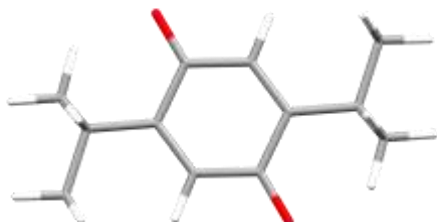

| <i>Element</i> | <i>X</i> | <i>Y</i> | <i>Z</i> |
|----------------|----------|----------|----------|
| C              | 3.303109 | 9.376035 | 6.77934  |
| C              | 7.385097 | 6.455541 | 6.779365 |
| C              | 6.126644 | 8.890609 | 6.779266 |
| C              | 5.941947 | 6.481589 | 6.779426 |
| C              | 7.569794 | 8.864561 | 6.779209 |
| C              | 3.201039 | 7.235153 | 5.518545 |
| C              | 3.201142 | 7.235327 | 8.040438 |
| C              | 10.20863 | 5.970116 | 6.779285 |
| C              | 10.31071 | 8.110999 | 8.040077 |
| C              | 5.305797 | 7.794222 | 6.779368 |
| C              | 8.205944 | 7.551928 | 6.779262 |
| C              | 3.777163 | 7.914385 | 6.779421 |
| C              | 9.734578 | 7.431765 | 6.779204 |

|   |          |          |          |
|---|----------|----------|----------|
| C | 10.3106  | 8.110821 | 5.518184 |
| H | 3.576197 | 7.724574 | 4.616087 |
| H | 3.479519 | 6.184382 | 5.485504 |
| H | 3.479637 | 6.184564 | 8.073609 |
| H | 2.109873 | 7.311923 | 5.51487  |
| H | 11.40187 | 8.03423  | 8.043749 |
| H | 3.647742 | 9.915802 | 7.663797 |
| H | 2.109975 | 7.312084 | 8.044186 |
| H | 2.211015 | 9.401307 | 6.77938  |
| H | 3.647675 | 9.915682 | 5.894784 |
| H | 3.576364 | 7.724881 | 8.942798 |
| H | 7.797147 | 5.454972 | 6.779408 |
| H | 9.864072 | 5.430469 | 7.663844 |
| H | 9.863997 | 5.430346 | 5.894831 |
| H | 11.40176 | 8.034064 | 5.514433 |
| H | 9.935371 | 7.621267 | 4.615827 |
| H | 10.0321  | 9.161584 | 5.485014 |
| H | 10.03222 | 9.161769 | 8.073118 |
| H | 5.714595 | 9.891177 | 6.779219 |
| H | 9.935552 | 7.621578 | 8.942537 |
| H | 11.30073 | 5.944844 | 6.77924  |
| O | 5.295675 | 5.388683 | 6.779517 |
| O | 8.216067 | 9.957467 | 6.77911  |

*Doubly Reduced*

PBE/def2TZVP

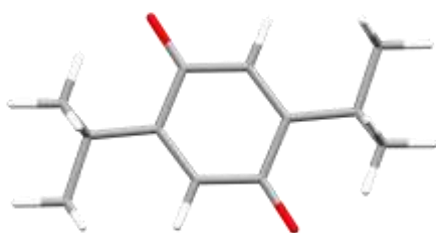

| <i>Element</i> | <i>X</i> | <i>Y</i> | <i>Z</i> |
|----------------|----------|----------|----------|
| C              | 3.319692 | 9.391844 | 6.779344 |
| C              | 7.328489 | 6.431683 | 6.779376 |
| C              | 6.183252 | 8.914467 | 6.779256 |
| C              | 5.898235 | 6.456813 | 6.779437 |
| C              | 7.613507 | 8.889336 | 6.7792   |
| C              | 3.234636 | 7.233195 | 5.523949 |
| C              | 3.234736 | 7.233357 | 8.035024 |
| C              | 10.19205 | 5.954307 | 6.779289 |
| C              | 10.27711 | 8.112964 | 8.034669 |
| C              | 5.336029 | 7.790913 | 6.779367 |

|   |          |          |          |
|---|----------|----------|----------|
| C | 8.175713 | 7.555237 | 6.779263 |
| C | 3.803985 | 7.934226 | 6.779418 |
| C | 9.707757 | 7.411924 | 6.779206 |
| C | 10.277   | 8.112784 | 5.523594 |
| H | 3.579973 | 7.751567 | 4.613721 |
| H | 3.613788 | 6.197137 | 5.521782 |
| H | 3.613887 | 6.197299 | 8.037294 |
| H | 2.12507  | 7.234524 | 5.528928 |
| H | 11.38668 | 8.111635 | 8.029686 |
| H | 3.676987 | 9.935771 | 7.668337 |
| H | 2.12517  | 7.234685 | 8.030133 |
| H | 2.213616 | 9.415122 | 6.779386 |
| H | 3.676916 | 9.935656 | 5.890252 |
| H | 3.580146 | 7.751846 | 8.945157 |
| H | 7.750047 | 5.419506 | 6.779425 |
| H | 9.83483  | 5.4105   | 7.668387 |
| H | 9.834751 | 5.410373 | 5.890302 |
| H | 11.38657 | 8.111457 | 5.528481 |
| H | 9.931588 | 7.594287 | 4.613465 |
| H | 9.897848 | 9.148842 | 5.521317 |
| H | 9.89796  | 9.149023 | 8.036829 |
| H | 5.761695 | 9.926644 | 6.779203 |
| H | 9.931775 | 7.594599 | 8.944901 |
| H | 11.29813 | 5.931029 | 6.779242 |
| O | 5.183272 | 5.352906 | 6.779539 |
| O | 8.32847  | 9.993244 | 6.779093 |

B3LYP/def2TZVP

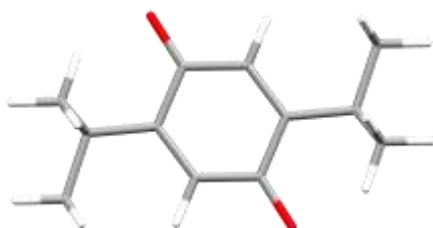

| <i>Element</i> | <i>X</i> | <i>Y</i> | <i>Z</i> |
|----------------|----------|----------|----------|
| C              | 3.323997 | 9.382255 | 6.77934  |
| C              | 7.330661 | 6.440705 | 6.779372 |
| C              | 6.181081 | 8.905445 | 6.779252 |
| C              | 5.908428 | 6.462258 | 6.779431 |
| C              | 7.603313 | 8.883892 | 6.779194 |
| C              | 3.232131 | 7.232952 | 5.523495 |
| C              | 3.232236 | 7.233122 | 8.035485 |
| C              | 10.18774 | 5.963895 | 6.779285 |

|   |          |          |          |
|---|----------|----------|----------|
| C | 10.27961 | 8.113198 | 8.03513  |
| C | 5.340614 | 7.783899 | 6.779364 |
| C | 8.171127 | 7.562251 | 6.77926  |
| C | 3.80882  | 7.924276 | 6.779419 |
| C | 9.702922 | 7.421874 | 6.779206 |
| C | 10.27951 | 8.113028 | 5.52314  |
| H | 3.579793 | 7.747505 | 4.621862 |
| H | 3.586232 | 6.200425 | 5.505683 |
| H | 3.586338 | 6.200597 | 8.053407 |
| H | 2.131135 | 7.252282 | 5.529072 |
| H | 11.38061 | 8.093869 | 8.029553 |
| H | 3.676674 | 9.922125 | 7.661695 |
| H | 2.131239 | 7.252451 | 8.029997 |
| H | 2.226341 | 9.405492 | 6.779385 |
| H | 3.6766   | 9.922005 | 5.896883 |
| H | 3.579973 | 7.747797 | 8.937019 |
| H | 7.748529 | 5.438352 | 6.779423 |
| H | 9.835142 | 5.424145 | 7.661742 |
| H | 9.835067 | 5.424025 | 5.896931 |
| H | 11.3805  | 8.093699 | 5.528628 |
| H | 9.931769 | 7.598353 | 4.621606 |
| H | 9.925403 | 9.145552 | 5.505218 |
| H | 9.925509 | 9.145725 | 8.052942 |
| H | 5.763212 | 9.907798 | 6.779201 |
| H | 9.931948 | 7.598646 | 8.936763 |
| H | 11.2854  | 5.940659 | 6.77924  |
| O | 5.202625 | 5.359231 | 6.779536 |
| O | 8.309117 | 9.986919 | 6.779089 |

B3LYP/def2TZVP (CPCM – DME)

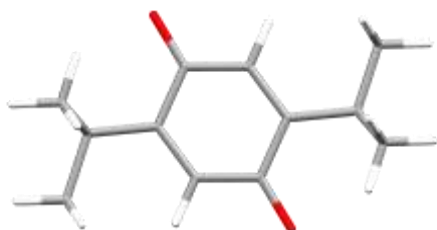

| <i>Element</i> | <i>X</i> | <i>Y</i> | <i>Z</i> |
|----------------|----------|----------|----------|
| C              | 3.321674 | 9.376295 | 6.779343 |
| C              | 7.345289 | 6.455838 | 6.779367 |
| C              | 6.166452 | 8.890312 | 6.779258 |
| C              | 5.924129 | 6.460821 | 6.779437 |
| C              | 7.587612 | 8.885329 | 6.779188 |
| C              | 3.213691 | 7.238719 | 5.520951 |

|   |          |          |          |
|---|----------|----------|----------|
| C | 3.213787 | 7.23889  | 8.038032 |
| C | 10.19007 | 5.969855 | 6.779282 |
| C | 10.29805 | 8.107431 | 8.037674 |
| C | 5.329162 | 7.76687  | 6.779373 |
| C | 8.18258  | 7.57928  | 6.779252 |
| C | 3.798016 | 7.914995 | 6.779424 |
| C | 9.713726 | 7.431155 | 6.779201 |
| C | 10.29796 | 8.10726  | 5.520593 |
| H | 3.558044 | 7.755074 | 4.619994 |
| H | 3.542288 | 6.20159  | 5.478181 |
| H | 3.54239  | 6.201769 | 8.080918 |
| H | 2.118029 | 7.272653 | 5.530875 |
| H | 11.39371 | 8.073497 | 8.02775  |
| H | 3.667797 | 9.917806 | 7.662552 |
| H | 2.118124 | 7.272821 | 8.028186 |
| H | 2.227763 | 9.402697 | 6.779386 |
| H | 3.667727 | 9.917686 | 5.896034 |
| H | 3.558206 | 7.755368 | 8.938893 |
| H | 7.783596 | 5.463598 | 6.779413 |
| H | 9.844015 | 5.428464 | 7.662591 |
| H | 9.843944 | 5.428344 | 5.896073 |
| H | 11.39362 | 8.073329 | 5.530439 |
| H | 9.953535 | 7.590782 | 4.619732 |
| H | 9.969352 | 9.144381 | 5.477707 |
| H | 9.969453 | 9.14456  | 8.080444 |
| H | 5.728146 | 9.882552 | 6.779212 |
| H | 9.953698 | 7.591076 | 8.938631 |
| H | 11.28398 | 5.943452 | 6.779239 |
| O | 5.243855 | 5.334991 | 6.779549 |
| O | 8.267886 | 10.01116 | 6.779076 |

## Lithium

*Oxidised*

PBE/def2TZVP

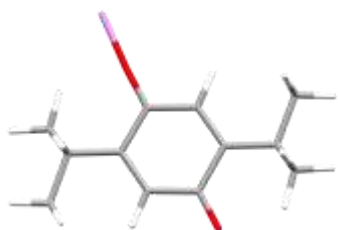

| <i>Element</i> | <i>X</i> | <i>Y</i> | <i>Z</i> |
|----------------|----------|----------|----------|
| C              | -3.3791  | -1.79262 | 0.002996 |

|    |          |          |          |
|----|----------|----------|----------|
| C  | 0.769699 | 1.144185 | 2.16E-05 |
| C  | -0.57826 | -1.32013 | -0.00034 |
| C  | -0.6827  | 1.072814 | 0.001908 |
| C  | 0.903737 | -1.27792 | -0.00229 |
| C  | -3.48138 | 0.34216  | 1.277349 |
| C  | -3.48478 | 0.3444   | -1.26732 |
| C  | 3.584845 | 1.613614 | -0.00335 |
| C  | 3.656061 | -0.54538 | -1.2743  |
| C  | -1.38717 | -0.23334 | 0.0017   |
| C  | 1.593369 | 0.063357 | -0.00203 |
| C  | -2.91352 | -0.32682 | 0.003662 |
| C  | 3.103912 | 0.155051 | -0.00398 |
| C  | 3.659464 | -0.54761 | 1.263626 |
| H  | -3.10093 | -0.14985 | 2.183669 |
| H  | -3.22751 | 1.407884 | 1.340689 |
| H  | -3.23105 | 1.410223 | -1.32949 |
| H  | -4.57681 | 0.252016 | 1.280379 |
| H  | 4.750293 | -0.44189 | -1.28271 |
| H  | -3.03733 | -2.33412 | -0.89099 |
| H  | -4.58022 | 0.254292 | -1.26756 |
| H  | -4.47712 | -1.82128 | 0.004437 |
| H  | -3.03494 | -2.33569 | 0.895116 |
| H  | -3.10679 | -0.14604 | -2.17552 |
| H  | 1.168914 | 2.159217 | 0.000383 |
| H  | 3.249964 | 2.160951 | -0.89759 |
| H  | 3.252366 | 2.15938  | 0.892754 |
| H  | 4.753716 | -0.44413 | 1.269278 |
| H  | 3.271461 | -0.07703 | 2.178782 |
| H  | 3.412198 | -1.61437 | 1.277628 |
| H  | 3.408755 | -1.61212 | -1.28951 |
| H  | -0.97478 | -2.33551 | -0.0007  |
| H  | 3.265604 | -0.0732  | -2.18759 |
| H  | 4.682779 | 1.628309 | -0.00481 |
| O  | -1.31988 | 2.163314 | 0.003725 |
| O  | 1.518653 | -2.33966 | -0.00404 |
| Li | -2.08763 | 3.707886 | 0.006133 |

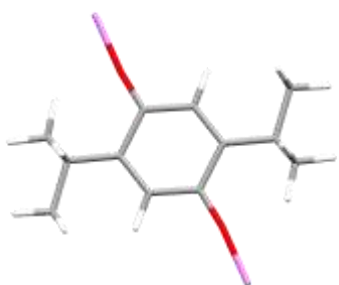

| <i>Element</i> | <i>X</i>  | <i>Y</i>  | <i>Z</i>  |
|----------------|-----------|-----------|-----------|
| C              | 3.435388  | 1.791509  | -0.000003 |
| C              | -0.648496 | -1.246588 | 0.000013  |
| C              | 0.648496  | 1.246593  | -0.000002 |
| C              | 0.811795  | -1.157361 | 0.000015  |
| C              | -0.811795 | 1.157366  | -0.000003 |
| C              | 3.584878  | -0.348495 | 1.275478  |
| C              | 3.584881  | -0.348511 | -1.275456 |
| C              | -3.435388 | -1.791504 | 0.000013  |
| C              | -3.584878 | 0.348500  | -1.275468 |
| C              | 1.490447  | 0.180593  | 0.000006  |
| C              | -1.490447 | -0.180588 | 0.000005  |
| C              | 3.002997  | 0.316630  | 0.000006  |
| C              | -3.002997 | -0.316625 | 0.000004  |
| C              | -3.584882 | 0.348515  | 1.275466  |
| H              | 3.194709  | 0.127633  | 2.185800  |
| H              | 3.367337  | -1.421703 | 1.328449  |
| H              | 3.367339  | -1.421720 | -1.328415 |
| H              | 4.676144  | -0.222613 | 1.272553  |
| H              | -4.676145 | 0.222617  | -1.272543 |
| H              | 3.086979  | 2.326670  | -0.895923 |
| H              | 4.676147  | -0.222630 | -1.272530 |
| H              | 4.531859  | 1.842931  | 0.000000  |
| H              | 3.086974  | 2.326683  | 0.895909  |
| H              | 3.194714  | 0.127607  | -2.185785 |
| H              | -1.037197 | -2.264948 | 0.000019  |
| H              | -3.086975 | -2.326678 | -0.895899 |
| H              | -3.086978 | -2.326666 | 0.895933  |
| H              | -4.676148 | 0.222632  | 1.272540  |
| H              | -3.194714 | -0.127602 | 2.185795  |
| H              | -3.367342 | 1.421724  | 1.328425  |
| H              | -3.367338 | 1.421708  | -1.328439 |
| H              | 1.037197  | 2.264953  | -0.000008 |
| H              | -3.194709 | -0.127629 | -2.185789 |
| H              | -4.531860 | -1.842927 | 0.000011  |
| O              | 1.463240  | -2.225340 | 0.000021  |

|    |           |           |           |
|----|-----------|-----------|-----------|
| O  | -1.463240 | 2.225346  | -0.000011 |
| Li | 2.200684  | -3.857904 | 0.000041  |
| Li | -2.200684 | 3.857910  | -0.000023 |

B3LYP/def2TZVP

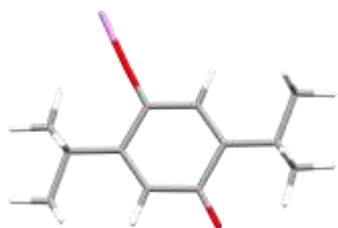

| <i>Element</i> | <i>X</i> | <i>Y</i> | <i>Z</i> |
|----------------|----------|----------|----------|
| C              | -3.38324 | -1.78915 | 0.003007 |
| C              | 0.771724 | 1.139483 | 1.28E-05 |
| C              | -0.58035 | -1.31728 | -0.00034 |
| C              | -0.6804  | 1.064213 | 0.001893 |
| C              | 0.902719 | -1.27179 | -0.00228 |
| C              | -3.47547 | 0.343486 | 1.275494 |
| C              | -3.47888 | 0.34572  | -1.26548 |
| C              | 3.5865   | 1.611999 | -0.00334 |
| C              | 3.652398 | -0.54233 | -1.27326 |
| C              | -1.38316 | -0.24037 | 0.001688 |
| C              | 1.589833 | 0.069029 | -0.00203 |
| C              | -2.91074 | -0.32626 | 0.00366  |
| C              | 3.102777 | 0.154924 | -0.00398 |
| C              | 3.655797 | -0.54456 | 1.262603 |
| H              | -3.09789 | -0.14639 | 2.174324 |
| H              | -3.21996 | 1.399842 | 1.339031 |
| H              | -3.22353 | 1.402187 | -1.32784 |
| H              | -4.56292 | 0.258905 | 1.280637 |
| H              | 4.738431 | -0.44207 | -1.28565 |
| H              | -3.04573 | -2.32712 | -0.88428 |
| H              | -4.56633 | 0.261147 | -1.26785 |
| H              | -4.47297 | -1.81326 | 0.004446 |
| H              | -3.04335 | -2.32868 | 0.888441 |
| H              | -3.10371 | -0.14257 | -2.16618 |
| H              | 1.158264 | 2.148594 | 0.000382 |
| H              | 3.253949 | 2.154817 | -0.8908  |
| H              | 3.256331 | 2.153254 | 0.885953 |
| H              | 4.74186  | -0.44432 | 1.272253 |
| H              | 3.268635 | -0.0752  | 2.169254 |
| H              | 3.410252 | -1.6028  | 1.280269 |
| H              | 3.406803 | -1.60054 | -1.29213 |

|    |          |          |          |
|----|----------|----------|----------|
| H  | -0.9662  | -2.32629 | -0.00071 |
| H  | 3.262808 | -0.07138 | -2.17805 |
| H  | 4.676025 | 1.625279 | -0.00479 |
| O  | -1.31218 | 2.143341 | 0.003689 |
| O  | 1.512305 | -2.32026 | -0.00402 |
| Li | -2.0965  | 3.666742 | 0.00608  |

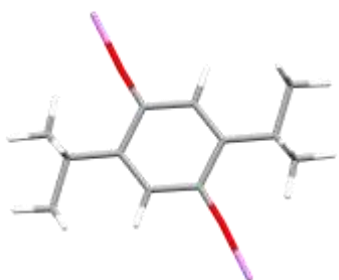

| Element | X         | Y         | Z         |
|---------|-----------|-----------|-----------|
| C       | 3.442302  | 1.785554  | -0.000004 |
| C       | -0.652287 | -1.242548 | 0.000011  |
| C       | 0.652287  | 1.242553  | -0.000005 |
| C       | 0.810030  | -1.149397 | 0.000010  |
| C       | -0.810031 | 1.149402  | -0.000007 |
| C       | 3.580160  | -0.351648 | 1.273708  |
| C       | 3.580167  | -0.351670 | -1.273679 |
| C       | -3.442302 | -1.785549 | 0.000009  |
| C       | -3.580165 | 0.351659  | -1.273692 |
| C       | 1.487134  | 0.186913  | 0.000004  |
| C       | -1.487135 | -0.186908 | 0.000003  |
| C       | 3.003514  | 0.312788  | 0.000007  |
| C       | -3.003514 | -0.312783 | 0.000004  |
| C       | -3.580164 | 0.351668  | 1.273696  |
| H       | 3.192448  | 0.123323  | 2.175979  |
| H       | 3.358789  | -1.415388 | 1.328973  |
| H       | 3.358796  | -1.415410 | -1.328928 |
| H       | 4.663793  | -0.234135 | 1.275511  |
| H       | -4.663798 | 0.234146  | -1.275491 |
| H       | 3.097329  | 2.316722  | -0.889088 |
| H       | 4.663800  | -0.234157 | -1.275477 |
| H       | 4.530508  | 1.832462  | 0.000000  |
| H       | 3.097322  | 2.316738  | 0.889069  |
| H       | 3.192461  | 0.123287  | -2.175960 |
| H       | -1.026671 | -2.255701 | 0.000018  |
| H       | -3.097327 | -2.316728 | -0.889068 |
| H       | -3.097324 | -2.316723 | 0.889089  |
| H       | -4.663797 | 0.234154  | 1.275497  |
| H       | -3.192454 | -0.123293 | 2.175973  |

|    |           |           |           |
|----|-----------|-----------|-----------|
| H  | -3.358794 | 1.415408  | 1.328949  |
| H  | -3.358794 | 1.415399  | -1.328952 |
| H  | 1.026671  | 2.255706  | -0.000011 |
| H  | -3.192456 | -0.123308 | -2.175966 |
| H  | -4.530508 | -1.832458 | 0.000011  |
| O  | 1.453921  | -2.205913 | 0.000019  |
| O  | -1.453922 | 2.205918  | -0.000015 |
| Li | 2.248048  | -3.796084 | 0.000034  |
| Li | -2.248048 | 3.796090  | -0.000026 |

B3LYP/def2TZVP (CPCM – DME)

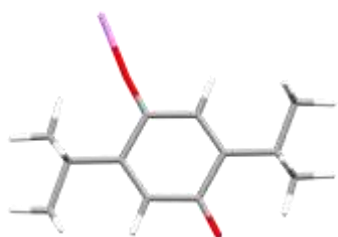

| Element | X        | Y        | Z        |
|---------|----------|----------|----------|
| C       | -3.38779 | -1.81006 | 0.002994 |
| C       | 0.763758 | 1.129692 | 1.49E-05 |
| C       | -0.581   | -1.3325  | -0.00035 |
| C       | -0.70276 | 1.060358 | 0.00192  |
| C       | 0.897399 | -1.27749 | -0.00228 |
| C       | -3.47406 | 0.331633 | 1.272376 |
| C       | -3.47745 | 0.333862 | -1.26238 |
| C       | 3.573011 | 1.612028 | -0.00333 |
| C       | 3.652323 | -0.53568 | -1.27184 |
| C       | -1.38942 | -0.26228 | 0.001677 |
| C       | 1.576723 | 0.061682 | -0.00201 |
| C       | -2.91341 | -0.34897 | 0.003643 |
| C       | 3.095965 | 0.152307 | -0.00397 |
| C       | 3.655718 | -0.5379  | 1.261187 |
| H       | -3.08447 | -0.14885 | 2.171947 |
| H       | -3.22634 | 1.389482 | 1.310616 |
| H       | -3.22984 | 1.391777 | -1.29943 |
| H       | -4.56115 | 0.234284 | 1.282027 |
| H       | 4.739346 | -0.43775 | -1.28293 |
| H       | -3.04842 | -2.3478  | -0.88411 |
| H       | -4.56457 | 0.236528 | -1.26929 |
| H       | -4.4781  | -1.82967 | 0.004439 |
| H       | -3.04605 | -2.34936 | 0.888242 |
| H       | -3.09028 | -0.14504 | -2.16384 |
| H       | 1.143624 | 2.141232 | 0.000395 |

|    |          |          |          |
|----|----------|----------|----------|
| H  | 3.232865 | 2.152065 | -0.88908 |
| H  | 3.235242 | 2.150506 | 0.88428  |
| H  | 4.742767 | -0.44    | 1.269536 |
| H  | 3.267044 | -0.06327 | 2.164489 |
| H  | 3.40527  | -1.59526 | 1.286555 |
| H  | 3.401805 | -1.59299 | -1.29839 |
| H  | -0.96334 | -2.34287 | -0.00072 |
| H  | 3.261229 | -0.05946 | -2.17326 |
| H  | 4.663289 | 1.629381 | -0.00477 |
| O  | -1.3346  | 2.117414 | 0.003696 |
| O  | 1.517828 | -2.3274  | -0.00404 |
| Li | -1.92827 | 3.93072  | 0.006087 |

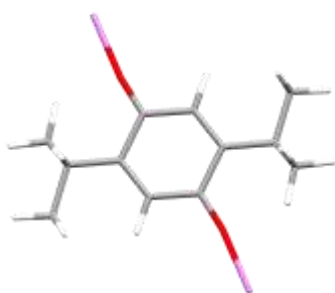

| <i>Element</i> | <i>X</i>  | <i>Y</i>  | <i>Z</i>  |
|----------------|-----------|-----------|-----------|
| C              | 3.438924  | 1.791194  | -0.000201 |
| C              | -0.645458 | -1.246722 | 0.000101  |
| C              | 0.645458  | 1.246726  | -0.000074 |
| C              | 0.822425  | -1.146614 | 0.000062  |
| C              | -0.822425 | 1.146618  | -0.000013 |
| C              | 3.575286  | -0.349993 | 1.268557  |
| C              | 3.575191  | -0.350131 | -1.268736 |
| C              | -3.438925 | -1.791189 | 0.000188  |
| C              | -3.575270 | 0.350009  | -1.268553 |
| C              | 1.480358  | 0.196122  | -0.000042 |
| C              | -1.480358 | -0.196118 | 0.000066  |
| C              | 2.998913  | 0.319498  | -0.000104 |
| C              | -2.998914 | -0.319494 | 0.000109  |
| C              | -3.575207 | 0.350125  | 1.268739  |
| H              | 3.175552  | 0.119898  | 2.169079  |
| H              | 3.354670  | -1.413608 | 1.306341  |
| H              | 3.354581  | -1.413752 | -1.306384 |
| H              | 4.659280  | -0.225602 | 1.275937  |
| H              | -4.659264 | 0.225617  | -1.275948 |
| H              | 3.087318  | 2.321418  | -0.887118 |
| H              | 4.659184  | -0.225733 | -1.276214 |
| H              | 4.528185  | 1.835385  | -0.000255 |
| H              | 3.087403  | 2.321510  | 0.886695  |

|    |           |           |           |
|----|-----------|-----------|-----------|
| H  | 3.175384  | 0.119656  | -2.169279 |
| H  | -1.003676 | -2.265674 | 0.000164  |
| H  | -3.087391 | -2.321499 | -0.886707 |
| H  | -3.087334 | -2.321421 | 0.887107  |
| H  | -4.659200 | 0.225728  | 1.276203  |
| H  | -3.175413 | -0.119672 | 2.169284  |
| H  | -3.354595 | 1.413745  | 1.306400  |
| H  | -3.354655 | 1.413624  | -1.306324 |
| H  | 1.003675  | 2.265678  | -0.000144 |
| H  | -3.175524 | -0.119873 | -2.169074 |
| H  | -4.528186 | -1.835380 | 0.000225  |
| O  | 1.473338  | -2.186978 | 0.000099  |
| O  | -1.473339 | 2.186982  | -0.000047 |
| Li | 2.246567  | -3.960270 | 0.000119  |
| Li | -2.246568 | 3.960275  | -0.000050 |

*Singly Reduced*

PBE/def2TZVP

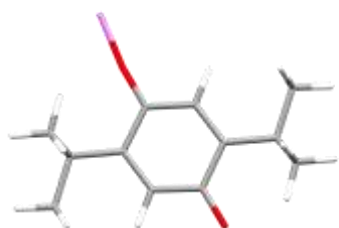

| <i>Element</i> | <i>X</i>  | <i>Y</i>  | <i>Z</i>  |
|----------------|-----------|-----------|-----------|
| C              | -3.348840 | -1.818543 | -0.000879 |
| C              | 0.713139  | 1.136254  | 0.000154  |
| C              | -0.535950 | -1.320413 | -0.000182 |
| C              | -0.714541 | 1.072286  | -0.000235 |
| C              | 0.915639  | -1.282936 | 0.000208  |
| C              | -3.478239 | 0.313093  | 1.266222  |
| C              | -3.477577 | 0.313012  | -1.268165 |
| C              | 3.536695  | 1.634044  | 0.000900  |
| C              | 3.645410  | -0.516283 | -1.261638 |
| C              | -1.363119 | -0.218770 | -0.000400 |
| C              | 1.549717  | 0.043043  | 0.000376  |
| C              | -2.893819 | -0.349507 | -0.000798 |
| C              | 3.072941  | 0.169030  | 0.000785  |
| C              | 3.644731  | -0.516267 | 1.263524  |
| H              | -3.107220 | -0.191961 | 2.170121  |
| H              | -3.193915 | 1.370954  | 1.331144  |
| H              | -3.193236 | 1.370877  | -1.332985 |
| H              | -4.577525 | 0.241840  | 1.262055  |

|    |           |           |           |
|----|-----------|-----------|-----------|
| H  | 4.743726  | -0.432015 | -1.266619 |
| H  | -2.993647 | -2.356861 | -0.891498 |
| H  | -4.576863 | 0.241750  | -1.264579 |
| H  | -4.448559 | -1.858832 | -0.001154 |
| H  | -2.994095 | -2.356814 | 0.889947  |
| H  | -3.106068 | -0.192075 | -2.171843 |
| H  | 1.121030  | 2.149265  | 0.000274  |
| H  | 3.188643  | 2.175709  | -0.892171 |
| H  | 3.188168  | 2.175721  | 0.893777  |
| H  | 4.743043  | -0.431998 | 1.269096  |
| H  | 3.260960  | -0.032729 | 2.174949  |
| H  | 3.369537  | -1.577166 | 1.285109  |
| H  | 3.370227  | -1.577182 | -1.283359 |
| H  | -0.941962 | -2.332172 | -0.000290 |
| H  | 3.262132  | -0.032754 | -2.173276 |
| H  | 4.636339  | 1.666166  | 0.001193  |
| O  | -1.383838 | 2.200596  | -0.000419 |
| O  | 1.567352  | -2.364636 | 0.000388  |
| Li | -2.018087 | 3.707775  | -0.001404 |

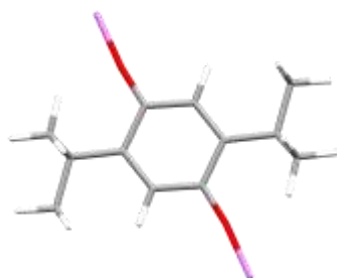

| <i>Element</i> | <i>X</i>  | <i>Y</i>  | <i>Z</i>  |
|----------------|-----------|-----------|-----------|
| C              | -3.397113 | -1.810193 | 0.000013  |
| C              | 0.603051  | 1.237954  | -0.000010 |
| C              | -0.603029 | -1.237943 | 0.000005  |
| C              | -0.829531 | 1.150066  | -0.000009 |
| C              | 0.829554  | -1.150055 | 0.000003  |
| C              | -3.578651 | 0.319290  | 1.269517  |
| C              | -3.578656 | 0.319276  | -1.269516 |
| C              | 3.397128  | 1.810205  | -0.000010 |
| C              | 3.578676  | -0.319281 | -1.269516 |
| C              | -1.459165 | -0.160917 | -0.000001 |
| C              | 1.459187  | 0.160928  | -0.000004 |
| C              | -2.981331 | -0.329674 | 0.000003  |
| C              | 2.981352  | 0.329685  | -0.000004 |
| C              | 3.578672  | -0.319271 | 1.269515  |
| H              | -3.190671 | -0.167481 | 2.175922  |
| H              | -3.339400 | 1.387709  | 1.331752  |

|    |           |           |           |
|----|-----------|-----------|-----------|
| H  | -3.339400 | 1.387692  | -1.331767 |
| H  | -4.672877 | 0.207106  | 1.266603  |
| H  | 4.672900  | -0.207079 | -1.266604 |
| H  | -3.035254 | -2.339928 | -0.893544 |
| H  | -4.672882 | 0.207095  | -1.266594 |
| H  | -4.494048 | -1.877567 | 0.000021  |
| H  | -3.035242 | -2.339920 | 0.893571  |
| H  | -3.190683 | -0.167509 | -2.175916 |
| H  | 0.995247  | 2.254975  | -0.000016 |
| H  | 3.035264  | 2.339931  | -0.893570 |
| H  | 3.035260  | 2.339939  | 0.893544  |
| H  | 4.672896  | -0.207071 | 1.266604  |
| H  | 3.190683  | 0.167499  | 2.175916  |
| H  | 3.339437  | -1.387693 | 1.331744  |
| H  | 3.339443  | -1.387704 | -1.331736 |
| H  | -0.995229 | -2.254964 | 0.000014  |
| H  | 3.190688  | 0.167480  | -2.175923 |
| H  | 4.494063  | 1.877581  | -0.000008 |
| O  | -1.509869 | 2.249694  | -0.000015 |
| O  | 1.509901  | -2.249679 | 0.000010  |
| Li | -2.208584 | 3.774174  | 0.000014  |
| Li | 2.208207  | -3.774355 | -0.000092 |

B3LYP/def2TZVP

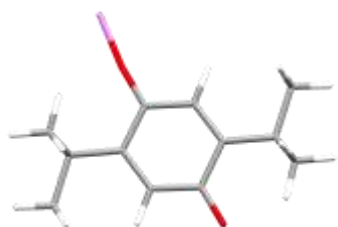

| <i>Element</i> | <i>X</i>  | <i>Y</i>  | <i>Z</i>  |
|----------------|-----------|-----------|-----------|
| C              | -3.347985 | -1.814564 | -0.000898 |
| C              | 0.711061  | 1.130151  | 0.000093  |
| C              | -0.536514 | -1.316151 | -0.000150 |
| C              | -0.711492 | 1.064296  | -0.000292 |
| C              | 0.910268  | -1.275212 | 0.000241  |
| C              | -3.472506 | 0.314294  | 1.264758  |
| C              | -3.471821 | 0.314205  | -1.266773 |
| C              | 3.533374  | 1.630477  | 0.000839  |
| C              | 3.641149  | -0.515040 | -1.260844 |
| C              | -1.358226 | -0.220597 | -0.000417 |
| C              | 1.543989  | 0.044385  | 0.000362  |
| C              | -2.888505 | -0.347554 | -0.000826 |

|    |           |           |           |
|----|-----------|-----------|-----------|
| C  | 3.067495  | 0.166634  | 0.000772  |
| C  | 3.640462  | -0.514936 | 1.262756  |
| H  | -3.102009 | -0.186059 | 2.161629  |
| H  | -3.195030 | 1.364332  | 1.329719  |
| H  | -3.194308 | 1.364237  | -1.331661 |
| H  | -4.563341 | 0.240397  | 1.262132  |
| H  | 4.730734  | -0.425205 | -1.268156 |
| H  | -2.997315 | -2.349495 | -0.884888 |
| H  | -4.562658 | 0.240309  | -1.264731 |
| H  | -4.439463 | -1.851938 | -0.001191 |
| H  | -2.997790 | -2.349433 | 0.883317  |
| H  | -3.100841 | -0.186215 | -2.163408 |
| H  | 1.110051  | 2.135654  | 0.000162  |
| H  | 3.188200  | 2.167799  | -0.885457 |
| H  | 3.187720  | 2.167871  | 0.886904  |
| H  | 4.730043  | -0.425102 | 1.270653  |
| H  | 3.255478  | -0.035636 | 2.166241  |
| H  | 3.375809  | -1.569051 | 1.288228  |
| H  | 3.376511  | -1.569156 | -1.286374 |
| H  | -0.934041 | -2.320519 | -0.000218 |
| H  | 3.256657  | -0.035813 | -2.164578 |
| H  | 4.624641  | 1.661890  | 0.001134  |
| O  | -1.377027 | 2.187343  | -0.000512 |
| O  | 1.557047  | -2.348049 | 0.000461  |
| Li | -2.007490 | 3.682951  | -0.000696 |

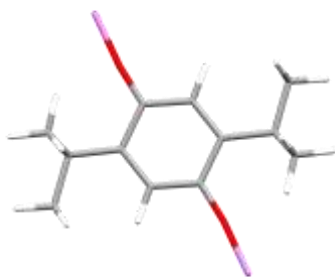

| <i>Element</i> | <i>X</i>  | <i>Y</i>  | <i>Z</i>  |
|----------------|-----------|-----------|-----------|
| C              | -3.396190 | -1.806356 | 0.000006  |
| C              | 0.602058  | 1.233404  | -0.000007 |
| C              | -0.602058 | -1.233406 | 0.000003  |
| C              | -0.826299 | 1.142402  | -0.000003 |
| C              | 0.826299  | -1.142404 | 0.000001  |
| C              | -3.572049 | 0.320708  | 1.267983  |
| C              | -3.572052 | 0.320702  | -1.267980 |
| C              | 3.396187  | 1.806355  | -0.000010 |
| C              | 3.572049  | -0.320706 | -1.267989 |
| C              | -1.453360 | -0.164015 | 0.000001  |

|    |           |           |           |
|----|-----------|-----------|-----------|
| C  | 1.453360  | 0.164013  | -0.000004 |
| C  | -2.976018 | -0.327763 | 0.000002  |
| C  | 2.976018  | 0.327763  | -0.000007 |
| C  | 3.572054  | -0.320703 | 1.267975  |
| H  | -3.184349 | -0.161639 | 2.167064  |
| H  | -3.337498 | 1.380938  | 1.329855  |
| H  | -3.337503 | 1.380932  | -1.329856 |
| H  | -4.657830 | 0.207730  | 1.267508  |
| H  | 4.657829  | -0.207724 | -1.267516 |
| H  | -3.037746 | -2.332385 | -0.886669 |
| H  | -4.657832 | 0.207721  | -1.267504 |
| H  | -4.484878 | -1.870921 | 0.000003  |
| H  | -3.037752 | -2.332379 | 0.886687  |
| H  | -3.184350 | -0.161646 | -2.167059 |
| H  | 0.983453  | 2.243789  | -0.000012 |
| H  | 3.037745  | 2.332380  | -0.886689 |
| H  | 3.037746  | 2.332383  | 0.886667  |
| H  | 4.657834  | -0.207724 | 1.267496  |
| H  | 3.184356  | 0.161647  | 2.167055  |
| H  | 3.337503  | -1.380933 | 1.329852  |
| H  | 3.337502  | -1.380937 | -1.329861 |
| H  | -0.983454 | -2.243791 | 0.000008  |
| H  | 3.184344  | 0.161639  | -2.167069 |
| H  | 4.484875  | 1.870923  | -0.000010 |
| O  | -1.502687 | 2.233960  | -0.000008 |
| O  | 1.502686  | -2.233962 | 0.000004  |
| Li | -2.209741 | 3.741150  | 0.000009  |
| Li | 2.209740  | -3.741152 | -0.000014 |

B3LYP/def2TZVP (CPCM – DME)

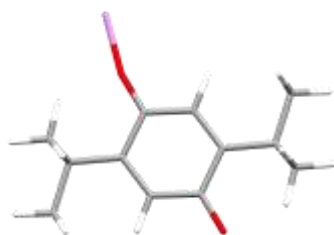

| <i>Element</i> | <i>X</i>  | <i>Y</i>  | <i>Z</i>  |
|----------------|-----------|-----------|-----------|
| C              | -3.352567 | -1.830741 | -0.000882 |
| C              | 0.704824  | 1.120872  | 0.000093  |
| C              | -0.537630 | -1.325510 | -0.000134 |
| C              | -0.727847 | 1.066177  | -0.000273 |
| C              | 0.906791  | -1.284090 | 0.000253  |
| C              | -3.476301 | 0.304896  | 1.262409  |

|    |           |           |           |
|----|-----------|-----------|-----------|
| C  | -3.475607 | 0.304804  | -1.264400 |
| C  | 3.522166  | 1.632187  | 0.000793  |
| C  | 3.643088  | -0.508463 | -1.261126 |
| C  | -1.364906 | -0.234710 | -0.000399 |
| C  | 1.537126  | 0.033998  | 0.000358  |
| C  | -2.893537 | -0.364044 | -0.000811 |
| C  | 3.062633  | 0.166006  | 0.000753  |
| C  | 3.642420  | -0.508324 | 1.263013  |
| H  | -3.097825 | -0.184897 | 2.162747  |
| H  | -3.212929 | 1.358952  | 1.307375  |
| H  | -3.212209 | 1.358856  | -1.309299 |
| H  | -4.565979 | 0.216711  | 1.263828  |
| H  | 4.732585  | -0.417672 | -1.265015 |
| H  | -3.003200 | -2.366575 | -0.885517 |
| H  | -4.565284 | 0.216620  | -1.266409 |
| H  | -4.443918 | -1.866106 | -0.001189 |
| H  | -3.003700 | -2.366505 | 0.883993  |
| H  | -3.096638 | -0.185057 | -2.164493 |
| H  | 1.106055  | 2.125526  | 0.000158  |
| H  | 3.173966  | 2.168297  | -0.884593 |
| H  | 3.173488  | 2.168398  | 0.885931  |
| H  | 4.731915  | -0.417534 | 1.267466  |
| H  | 3.260308  | -0.024436 | 2.165324  |
| H  | 3.379005  | -1.562735 | 1.296157  |
| H  | 3.379692  | -1.562878 | -1.294293 |
| H  | -0.940346 | -2.328928 | -0.000202 |
| H  | 3.261451  | -0.024676 | -2.163693 |
| H  | 4.613461  | 1.667287  | 0.001086  |
| O  | -1.391858 | 2.165172  | -0.000481 |
| O  | 1.558580  | -2.366131 | 0.000485  |
| Li | -1.844946 | 3.876753  | -0.000682 |

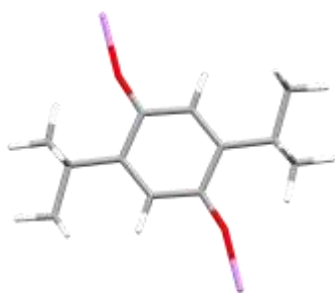

| <i>Element</i> | <i>X</i>  | <i>Y</i>  | <i>Z</i>  |
|----------------|-----------|-----------|-----------|
| C              | -3.382863 | -1.832885 | -0.000812 |
| C              | 0.586759  | 1.241245  | 0.000224  |
| C              | -0.586760 | -1.241247 | -0.000230 |
| C              | -0.846228 | 1.143445  | -0.000059 |

|    |           |           |           |
|----|-----------|-----------|-----------|
| C  | 0.846228  | -1.143448 | 0.000053  |
| C  | -3.570716 | 0.299344  | 1.263491  |
| C  | -3.570235 | 0.299571  | -1.264806 |
| C  | 3.382858  | 1.832885  | 0.000814  |
| C  | 3.570717  | -0.299340 | -1.263498 |
| C  | -1.447920 | -0.178348 | -0.000296 |
| C  | 1.447919  | 0.178345  | 0.000290  |
| C  | -2.969988 | -0.352702 | -0.000601 |
| C  | 2.969987  | 0.352701  | 0.000597  |
| C  | 3.570234  | -0.299575 | 1.264801  |
| H  | -3.174299 | -0.174959 | 2.164232  |
| H  | -3.345707 | 1.362190  | 1.306043  |
| H  | -3.345209 | 1.362424  | -1.307080 |
| H  | -4.656097 | 0.172879  | 1.266159  |
| H  | 4.656097  | -0.172873 | -1.266163 |
| H  | -3.018433 | -2.357392 | -0.886294 |
| H  | -4.655614 | 0.173106  | -1.267910 |
| H  | -4.472153 | -1.901536 | -0.001025 |
| H  | -3.018769 | -2.357551 | 0.884714  |
| H  | -3.173472 | -0.174570 | -2.165481 |
| H  | 0.958610  | 2.256261  | 0.000389  |
| H  | 3.018763  | 2.357554  | -0.884710 |
| H  | 3.018425  | 2.357388  | 0.886298  |
| H  | 4.655613  | -0.173108 | 1.267906  |
| H  | 3.173470  | 0.174562  | 2.165477  |
| H  | 3.345210  | -1.362429 | 1.307072  |
| H  | 3.345708  | -1.362185 | -1.306053 |
| H  | -0.958610 | -2.256263 | -0.000394 |
| H  | 3.174299  | 0.174967  | -2.164237 |
| H  | 4.472147  | 1.901539  | 0.001028  |
| O  | -1.539469 | 2.214530  | -0.000095 |
| O  | 1.539471  | -2.214532 | 0.000082  |
| Li | -1.984242 | 3.951544  | -0.000014 |
| Li | 1.984262  | -3.951543 | 0.000005  |

*Doubly Reduced*

PBE/def2TZVP

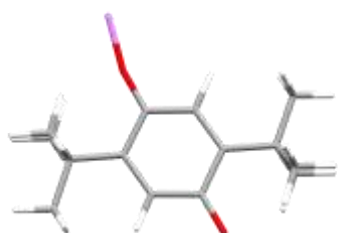

| <i>Element</i> | <i>X</i>  | <i>Y</i>  | <i>Z</i>  |
|----------------|-----------|-----------|-----------|
| C              | -3.420723 | -1.714073 | 0.040486  |
| C              | 0.667433  | 1.150947  | -0.120159 |
| C              | -0.585663 | -1.276553 | 0.055581  |
| C              | -0.751894 | 1.131089  | -0.096693 |
| C              | 0.855275  | -1.281330 | 0.064347  |
| C              | -3.526896 | 0.492416  | 1.173048  |
| C              | -3.479651 | 0.347428  | -1.349256 |
| C              | 3.515741  | 1.578660  | -0.193886 |
| C              | 3.560023  | -0.669913 | -1.273625 |
| C              | -1.396595 | -0.147403 | -0.026287 |
| C              | 1.484900  | 0.029392  | -0.042276 |
| C              | -2.931216 | -0.258441 | -0.039108 |
| C              | 3.014363  | 0.131707  | -0.069894 |
| C              | 3.587963  | -0.465038 | 1.235669  |
| H              | -3.169298 | 0.043658  | 2.112651  |
| H              | -3.219350 | 1.545013  | 1.156852  |
| H              | -3.145123 | 1.387160  | -1.462954 |
| H              | -4.629819 | 0.438763  | 1.160697  |
| H              | 4.664270  | -0.647344 | -1.285268 |
| H              | -3.051057 | -2.312623 | -0.805175 |
| H              | -4.583473 | 0.322102  | -1.359635 |
| H              | -4.522871 | -1.731081 | 0.014414  |
| H              | -3.094658 | -2.203995 | 0.970125  |
| H              | -3.114701 | -0.229607 | -2.212857 |
| H              | 1.103840  | 2.149565  | -0.213628 |
| H              | 3.163570  | 2.055025  | -1.122304 |
| H              | 3.185287  | 2.199223  | 0.653679  |
| H              | 4.692190  | -0.444232 | 1.219171  |
| H              | 3.245092  | 0.117865  | 2.105392  |
| H              | 3.242322  | -1.501890 | 1.344020  |
| H              | 3.215884  | -1.710503 | -1.205084 |
| H              | -1.024049 | -2.273782 | 0.127864  |
| H              | 3.196230  | -0.235486 | -2.218279 |
| H              | 4.618158  | 1.584745  | -0.207668 |
| O              | -1.415251 | 2.285086  | -0.146060 |
| O              | 1.507771  | -2.382943 | 0.150069  |
| Li             | -1.836412 | 3.865769  | 0.015107  |

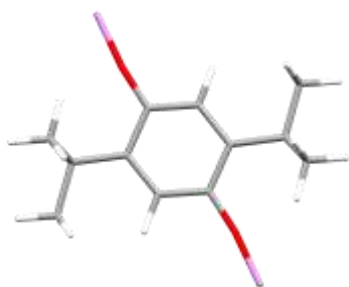

| <i>Element</i> | <i>X</i>  | <i>Y</i>  | <i>Z</i>  |
|----------------|-----------|-----------|-----------|
| C              | -3.366475 | -1.828945 | -0.001458 |
| C              | 0.557640  | 1.240908  | -0.000153 |
| C              | -0.557635 | -1.240908 | 0.000001  |
| C              | -0.848896 | 1.150852  | -0.000944 |
| C              | 0.848902  | -1.150851 | 0.000797  |
| C              | -3.565676 | 0.297072  | 1.263502  |
| C              | -3.564190 | 0.296256  | -1.268021 |
| C              | 3.366477  | 1.828948  | 0.001265  |
| C              | 3.565677  | -0.297094 | -1.263656 |
| C              | -1.432345 | -0.148515 | -0.000865 |
| C              | 1.432350  | 0.148514  | 0.000710  |
| C              | -2.957136 | -0.346432 | -0.001696 |
| C              | 2.957141  | 0.346434  | 0.001531  |
| C              | 3.564201  | -0.296229 | 1.267866  |
| H              | -3.192907 | -0.209757 | 2.166254  |
| H              | -3.285199 | 1.356086  | 1.331380  |
| H              | -3.283638 | 1.355227  | -1.336250 |
| H              | -4.665464 | 0.215000  | 1.252488  |
| H              | 4.665465  | -0.215018 | -1.252648 |
| H              | -2.993223 | -2.355635 | -0.892390 |
| H              | -4.663991 | 0.214187  | -1.258247 |
| H              | -4.465175 | -1.905148 | -0.002084 |
| H              | -2.994279 | -2.355058 | 0.890257  |
| H              | -3.190359 | -0.211152 | -2.170008 |
| H              | 0.954279  | 2.257826  | -0.000254 |
| H              | 2.994272  | 2.355044  | -0.890456 |
| H              | 2.993232  | 2.355654  | 0.892191  |
| H              | 4.664001  | -0.214159 | 1.258088  |
| H              | 3.190370  | 0.211192  | 2.169846  |
| H              | 3.283651  | -1.355200 | 1.336113  |
| H              | 3.285203  | -1.356110 | -1.331514 |
| H              | -0.954272 | -2.257826 | 0.000093  |
| H              | 3.192903  | 0.209717  | -2.166416 |
| H              | 4.465176  | 1.905153  | 0.001879  |
| O              | -1.569056 | 2.279251  | -0.001732 |
| O              | 1.569062  | -2.279251 | 0.001587  |
| Li             | -2.256180 | 3.732173  | -0.002566 |

Li | 2.256187 -3.732172 0.002853

B3LYP/def2TZVP

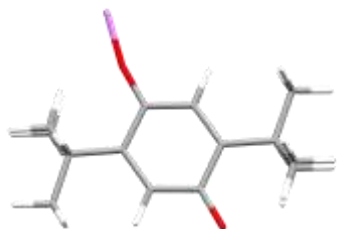

| Element | X         | Y         | Z         |
|---------|-----------|-----------|-----------|
| C       | -3.418581 | -1.706489 | 0.043495  |
| C       | 0.662369  | 1.143334  | -0.121846 |
| C       | -0.583395 | -1.272341 | 0.051688  |
| C       | -0.746909 | 1.122343  | -0.102422 |
| C       | 0.850885  | -1.278216 | 0.058736  |
| C       | -3.516126 | 0.496484  | 1.173652  |
| C       | -3.477070 | 0.348664  | -1.346757 |
| C       | 3.509929  | 1.573937  | -0.187729 |
| C       | 3.559465  | -0.665650 | -1.272850 |
| C       | -1.388961 | -0.144785 | -0.029359 |
| C       | 1.477449  | 0.025866  | -0.044647 |
| C       | -2.923392 | -0.253253 | -0.038788 |
| C       | 3.006655  | 0.127307  | -0.068407 |
| C       | 3.582456  | -0.467064 | 1.235624  |
| H       | -3.158119 | 0.049893  | 2.104556  |
| H       | -3.213677 | 1.540937  | 1.161036  |
| H       | -3.148313 | 1.379485  | -1.466458 |
| H       | -4.611075 | 0.441775  | 1.165460  |
| H       | 4.655751  | -0.637121 | -1.282220 |
| H       | -3.057192 | -2.302147 | -0.796456 |
| H       | -4.573037 | 0.320840  | -1.353855 |
| H       | -4.512836 | -1.720295 | 0.021640  |
| H       | -3.093489 | -2.192642 | 0.965155  |
| H       | -3.116910 | -0.226227 | -2.203435 |
| H       | 1.093712  | 2.133685  | -0.211829 |
| H       | 3.162816  | 2.048712  | -1.108824 |
| H       | 3.180775  | 2.187575  | 0.654487  |
| H       | 4.678718  | -0.439876 | 1.220556  |
| H       | 3.238999  | 0.111112  | 2.098296  |
| H       | 3.247956  | -1.497032 | 1.347936  |
| H       | 3.225847  | -1.700324 | -1.215839 |
| H       | -1.016979 | -2.260810 | 0.122367  |
| H       | 3.199025  | -0.230075 | -2.209050 |

|    |           |           |           |
|----|-----------|-----------|-----------|
| H  | 4.604222  | 1.580251  | -0.199186 |
| O  | -1.408698 | 2.281038  | -0.156226 |
| O  | 1.500596  | -2.372964 | 0.142386  |
| Li | -1.851253 | 3.823448  | -0.001811 |

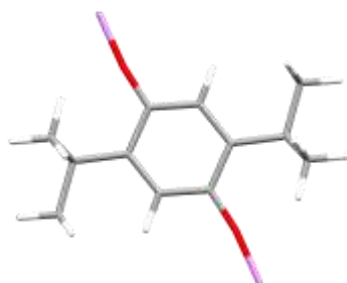

| <i>Element</i> | <i>X</i>  | <i>Y</i>  | <i>Z</i>  |
|----------------|-----------|-----------|-----------|
| C              | -3.361329 | -1.825436 | -0.001420 |
| C              | 0.554444  | 1.235404  | -0.000164 |
| C              | -0.554440 | -1.235399 | 0.000024  |
| C              | -0.844428 | 1.142738  | -0.000953 |
| C              | 0.844432  | -1.142733 | 0.000813  |
| C              | -3.561097 | 0.297027  | 1.262090  |
| C              | -3.559615 | 0.296167  | -1.266606 |
| C              | 3.361339  | 1.825437  | 0.001283  |
| C              | 3.561099  | -0.297025 | -1.262231 |
| C              | -1.426265 | -0.147935 | -0.000856 |
| C              | 1.426269  | 0.147941  | 0.000716  |
| C              | -2.950524 | -0.343747 | -0.001683 |
| C              | 2.950529  | 0.343750  | 0.001543  |
| C              | 3.559618  | -0.296170 | 1.266465  |
| H              | -3.185165 | -0.201752 | 2.158167  |
| H              | -3.295813 | 1.349987  | 1.329581  |
| H              | -3.294255 | 1.349082  | -1.334500 |
| H              | -4.651834 | 0.204495  | 1.253445  |
| H              | 4.651837  | -0.204500 | -1.253584 |
| H              | -2.991638 | -2.348259 | -0.885584 |
| H              | -4.650362 | 0.203637  | -1.259179 |
| H              | -4.451729 | -1.900745 | -0.002034 |
| H              | -2.992675 | -2.347656 | 0.883534  |
| H              | -3.182630 | -0.203219 | -2.161902 |
| H              | 0.942604  | 2.244781  | -0.000279 |
| H              | 2.992687  | 2.347661  | -0.883669 |
| H              | 2.991651  | 2.348260  | 0.885449  |
| H              | 4.650365  | -0.203640 | 1.259038  |
| H              | 3.182633  | 0.203212  | 2.161762  |
| H              | 3.294257  | -1.349085 | 1.334354  |
| H              | 3.295807  | -1.349982 | -1.329726 |

|    |           |           |           |
|----|-----------|-----------|-----------|
| H  | -0.942600 | -2.244775 | 0.000140  |
| H  | 3.185172  | 0.201760  | -2.158306 |
| H  | 4.451739  | 1.900743  | 0.001896  |
| O  | -1.561750 | 2.268275  | -0.001755 |
| O  | 1.561754  | -2.268269 | 0.001615  |
| Li | -2.224720 | 3.719851  | -0.002638 |
| Li | 2.224727  | -3.719845 | 0.002497  |

B3LYP/def2TZVP (CPCM – DME)

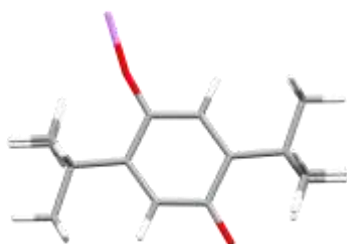

| <i>Element</i> | <i>X</i>  | <i>Y</i>  | <i>Z</i>  |
|----------------|-----------|-----------|-----------|
| C              | -3.418083 | -1.708274 | 0.049591  |
| C              | 0.657535  | 1.130910  | -0.127848 |
| C              | -0.572919 | -1.274416 | 0.034766  |
| C              | -0.751357 | 1.129922  | -0.123952 |
| C              | 0.850623  | -1.291991 | 0.040336  |
| C              | -3.499326 | 0.496545  | 1.180297  |
| C              | -3.496067 | 0.346031  | -1.336872 |
| C              | 3.504566  | 1.570474  | -0.173103 |
| C              | 3.577892  | -0.656345 | -1.269728 |
| C              | -1.386689 | -0.138129 | -0.042735 |
| C              | 1.475469  | 0.000653  | -0.051766 |
| C              | -2.921737 | -0.255569 | -0.037100 |
| C              | 3.007429  | 0.120343  | -0.063882 |
| C              | 3.583099  | -0.469484 | 1.241114  |
| H              | -3.152257 | 0.035805  | 2.109112  |
| H              | -3.179548 | 1.536491  | 1.171421  |
| H              | -3.173066 | 1.378548  | -1.452817 |
| H              | -4.593972 | 0.460378  | 1.175005  |
| H              | 4.673156  | -0.633829 | -1.263653 |
| H              | -3.076914 | -2.306091 | -0.797847 |
| H              | -4.590820 | 0.313144  | -1.328700 |
| H              | -4.511592 | -1.718823 | 0.046337  |
| H              | -3.083432 | -2.199037 | 0.965625  |
| H              | -3.149385 | -0.224611 | -2.202699 |
| H              | 1.107653  | 2.114841  | -0.195366 |
| H              | 3.164341  | 2.049921  | -1.093911 |
| H              | 3.170644  | 2.180847  | 0.669178  |

|    |           |           |           |
|----|-----------|-----------|-----------|
| H  | 4.678313  | -0.446925 | 1.228303  |
| H  | 3.244520  | 0.113581  | 2.102468  |
| H  | 3.246621  | -1.497573 | 1.360330  |
| H  | 3.240009  | -1.690454 | -1.235849 |
| H  | -1.027487 | -2.255590 | 0.100096  |
| H  | 3.237256  | -0.205563 | -2.206352 |
| H  | 4.598109  | 1.580747  | -0.177637 |
| O  | -1.412036 | 2.290428  | -0.193396 |
| O  | 1.504722  | -2.416600 | 0.123901  |
| Li | -1.903657 | 3.909072  | -0.073591 |

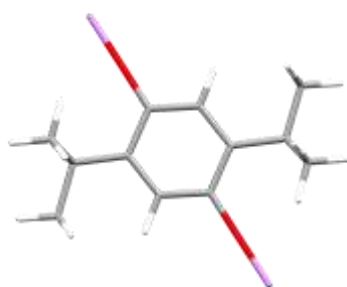

| <i>Element</i> | <i>X</i>  | <i>Y</i>  | <i>Z</i>  |
|----------------|-----------|-----------|-----------|
| C              | -3.372665 | -1.811841 | -0.001543 |
| C              | 0.558434  | 1.232917  | -0.000072 |
| C              | -0.558429 | -1.232914 | -0.000058 |
| C              | -0.849715 | 1.161813  | -0.000865 |
| C              | 0.849720  | -1.161810 | 0.000740  |
| C              | -3.564271 | 0.313689  | 1.259794  |
| C              | -3.562802 | 0.313019  | -1.264229 |
| C              | 3.372671  | 1.811842  | 0.001389  |
| C              | 3.564266  | -0.313696 | -1.259936 |
| C              | -1.427880 | -0.138830 | -0.000855 |
| C              | 1.427886  | 0.138833  | 0.000723  |
| C              | -2.953874 | -0.332412 | -0.001691 |
| C              | 2.953879  | 0.332414  | 0.001550  |
| C              | 3.562815  | -0.313009 | 1.264087  |
| H              | -3.193911 | -0.186173 | 2.158608  |
| H              | -3.297896 | 1.366710  | 1.319614  |
| H              | -3.296358 | 1.366009  | -1.324299 |
| H              | -4.655121 | 0.223929  | 1.249835  |
| H              | 4.655116  | -0.223938 | -1.249986 |
| H              | -3.007234 | -2.338835 | -0.885255 |
| H              | -4.653662 | 0.223263  | -1.255494 |
| H              | -4.463575 | -1.879505 | -0.002163 |
| H              | -3.008269 | -2.338366 | 0.882876  |
| H              | -3.191394 | -0.187320 | -2.162346 |
| H              | 0.959177  | 2.238737  | -0.000109 |

|    |           |           |           |
|----|-----------|-----------|-----------|
| H  | 3.008266  | 2.338362  | -0.883029 |
| H  | 3.007250  | 2.338842  | 0.885102  |
| H  | 4.653676  | -0.223257 | 1.255342  |
| H  | 3.191417  | 0.187338  | 2.162204  |
| H  | 3.296368  | -1.365997 | 1.324168  |
| H  | 3.297889  | -1.366718 | -1.319748 |
| H  | -0.959172 | -2.238734 | -0.000022 |
| H  | 3.193900  | 0.186162  | -2.158750 |
| H  | 4.463582  | 1.879506  | 0.001997  |
| O  | -1.559537 | 2.281221  | -0.001570 |
| O  | 1.559541  | -2.281219 | 0.001457  |
| Li | -2.482305 | 3.712497  | -0.002506 |
| Li | 2.482309  | -3.712493 | 0.002381  |

## Sodium

*Singly Reduced*

PBE/def2TZVP

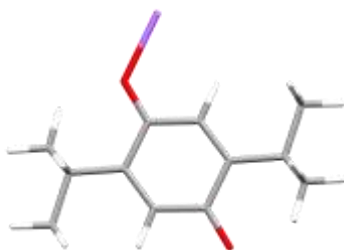

| <i>Element</i> | <i>X</i>  | <i>Y</i>  | <i>Z</i>  |
|----------------|-----------|-----------|-----------|
| C              | -3.445058 | -1.773201 | -0.000033 |
| C              | 0.648872  | 1.118002  | 0.000275  |
| C              | -0.621007 | -1.315378 | -0.000246 |
| C              | -0.786849 | 1.089984  | 0.000179  |
| C              | 0.830386  | -1.299402 | -0.000322 |
| C              | -3.537048 | 0.370880  | 1.263808  |
| C              | -3.537169 | 0.371070  | -1.263529 |
| C              | 3.488484  | 1.588164  | 0.000463  |
| C              | 3.568077  | -0.561210 | -1.262722 |
| C              | -1.437131 | -0.206588 | 0.000007  |
| C              | 1.478515  | 0.019771  | 0.000006  |
| C              | -2.968036 | -0.312140 | 0.000061  |
| C              | 3.003839  | 0.129612  | 0.000089  |
| C              | 3.567980  | -0.561823 | 1.262610  |
| H              | -3.159683 | -0.123073 | 2.171898  |
| H              | -3.252981 | 1.429722  | 1.297625  |
| H              | -3.253173 | 1.429939  | -1.297153 |
| H              | -4.636395 | 0.299022  | 1.268948  |

|    |           |           |           |
|----|-----------|-----------|-----------|
| H  | 4.667852  | -0.496388 | -1.266932 |
| H  | -3.099254 | -2.317660 | -0.891107 |
| H  | -4.636512 | 0.299153  | -1.268615 |
| H  | -4.545232 | -1.795484 | 0.000069  |
| H  | -3.099083 | -2.317818 | 0.890877  |
| H  | -3.159830 | -0.122692 | -2.171735 |
| H  | 1.100172  | 2.121058  | 0.000762  |
| H  | 3.150051  | 2.134036  | -0.895017 |
| H  | 3.149974  | 2.133620  | 0.896162  |
| H  | 4.667753  | -0.497002 | 1.266939  |
| H  | 3.192472  | -0.072100 | 2.174303  |
| H  | 3.273002  | -1.617357 | 1.283877  |
| H  | 3.273095  | -1.616731 | -1.284529 |
| H  | -1.041145 | -2.321687 | -0.000438 |
| H  | 3.192647  | -0.071041 | -2.174210 |
| H  | 4.588315  | 1.606224  | 0.000506  |
| O  | -1.457102 | 2.209892  | 0.000209  |
| O  | 1.476213  | -2.385627 | -0.000627 |
| Na | -0.538866 | 4.083384  | -0.003065 |

B3LYP/def2TZVP

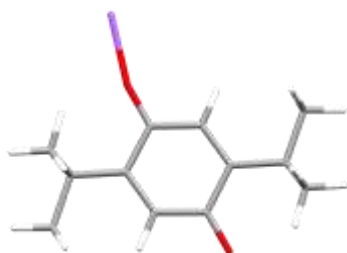

| <i>Element</i> | <i>X</i>  | <i>Y</i>  | <i>Z</i>  |
|----------------|-----------|-----------|-----------|
| C              | -3.429847 | -1.725819 | -0.000176 |
| C              | 0.704842  | 1.109746  | 0.000042  |
| C              | -0.601752 | -1.304098 | -0.000080 |
| C              | -0.722895 | 1.087573  | 0.000001  |
| C              | 0.845210  | -1.300993 | -0.000038 |
| C              | -3.492089 | 0.409738  | 1.263690  |
| C              | -3.492015 | 0.409828  | -1.263895 |
| C              | 3.541383  | 1.537107  | 0.000137  |
| C              | 3.592602  | -0.609790 | -1.261336 |
| C              | -1.395471 | -0.188670 | -0.000063 |
| C              | 1.509402  | 0.002912  | 0.000026  |
| C              | -2.928146 | -0.273189 | -0.000110 |
| C              | 3.036423  | 0.086187  | 0.000072  |
| C              | 3.592530  | -0.609878 | 1.261464  |

|    |           |           |           |
|----|-----------|-----------|-----------|
| H  | -3.132502 | -0.095653 | 2.162439  |
| H  | -3.184311 | 1.452147  | 1.315779  |
| H  | -3.184234 | 1.452240  | -1.315891 |
| H  | -4.584873 | 0.363897  | 1.263911  |
| H  | 4.684630  | -0.551889 | -1.268174 |
| H  | -3.093994 | -2.270526 | -0.884086 |
| H  | -4.584799 | 0.363987  | -1.264182 |
| H  | -4.522175 | -1.732620 | -0.000209 |
| H  | -3.094046 | -2.270588 | 0.883715  |
| H  | -3.132377 | -0.095499 | -2.162658 |
| H  | 1.131944  | 2.104644  | 0.000089  |
| H  | 3.209709  | 2.083203  | -0.886155 |
| H  | 3.209658  | 2.083142  | 0.886447  |
| H  | 4.684559  | -0.551977 | 1.268367  |
| H  | 3.222077  | -0.119062 | 2.164985  |
| H  | 3.296250  | -1.655575 | 1.287363  |
| H  | 3.296323  | -1.655486 | -1.287325 |
| H  | -1.024895 | -2.298339 | -0.000126 |
| H  | 3.222200  | -0.118911 | -2.164844 |
| H  | 4.633301  | 1.540042  | 0.000168  |
| O  | -1.363832 | 2.215508  | 0.000023  |
| O  | 1.467270  | -2.390238 | -0.000058 |
| Na | -1.809917 | 4.166028  | 0.000084  |

B3LYP/def2TZVP (CPCM – DME)

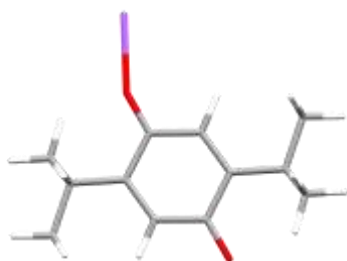

| <i>Element</i> | <i>X</i>  | <i>Y</i>  | <i>Z</i>  |
|----------------|-----------|-----------|-----------|
| C              | -3.434868 | -1.752235 | -0.001482 |
| C              | 0.690906  | 1.102745  | 0.000196  |
| C              | -0.605707 | -1.313952 | -0.000166 |
| C              | -0.745631 | 1.086492  | -0.000497 |
| C              | 0.838962  | -1.306884 | 0.000527  |
| C              | -3.504486 | 0.388306  | 1.260561  |
| C              | -3.503267 | 0.388027  | -1.264064 |
| C              | 3.519811  | 1.549660  | 0.001522  |
| C              | 3.591721  | -0.592840 | -1.260111 |
| C              | -1.408262 | -0.204849 | -0.000674 |
| C              | 1.497662  | -0.003370 | 0.000707  |

|    |           |           |           |
|----|-----------|-----------|-----------|
| C  | -2.939090 | -0.297854 | -0.001403 |
| C  | 3.026307  | 0.094528  | 0.001436  |
| C  | 3.590499  | -0.592575 | 1.263674  |
| H  | -3.138925 | -0.109339 | 2.162098  |
| H  | -3.211046 | 1.434833  | 1.299875  |
| H  | -3.209793 | 1.434547  | -1.303321 |
| H  | -4.596294 | 0.329057  | 1.262454  |
| H  | 4.683369  | -0.530896 | -1.262661 |
| H  | -3.098381 | -2.296817 | -0.885868 |
| H  | -4.595072 | 0.328773  | -1.267000 |
| H  | -4.526880 | -1.760802 | -0.002020 |
| H  | -3.099255 | -2.296616 | 0.883359  |
| H  | -3.136831 | -0.109812 | -2.165137 |
| H  | 1.117598  | 2.097268  | 0.000293  |
| H  | 3.184031  | 2.093700  | -0.883891 |
| H  | 3.183171  | 2.093886  | 0.886494  |
| H  | 4.682144  | -0.530626 | 1.267270  |
| H  | 3.221960  | -0.097634 | 2.165721  |
| H  | 3.298683  | -1.639454 | 1.298201  |
| H  | 3.299934  | -1.639724 | -1.294703 |
| H  | -1.031969 | -2.307866 | -0.000264 |
| H  | 3.224059  | -0.098085 | -2.162618 |
| H  | 4.611729  | 1.559783  | 0.002052  |
| O  | -1.384208 | 2.196058  | -0.000931 |
| O  | 1.466907  | -2.405076 | 0.000950  |
| Na | -1.453349 | 4.358770  | -0.001185 |

*Doubly Reduced*

PBE/def2TZVP

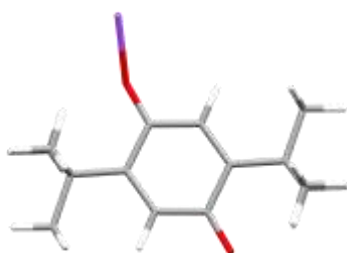

| <i>Element</i> | <i>X</i>  | <i>Y</i>  | <i>Z</i>  |
|----------------|-----------|-----------|-----------|
| C              | -3.434603 | -1.645531 | 0.023747  |
| C              | 0.674009  | 1.209451  | -0.089649 |
| C              | -0.598896 | -1.217698 | 0.001981  |
| C              | -0.755151 | 1.200101  | -0.099307 |
| C              | 0.845183  | -1.225391 | -0.006538 |
| C              | -3.478078 | 0.513607  | 1.255983  |
| C              | -3.529135 | 0.478500  | -1.267804 |

|    |           |           |           |
|----|-----------|-----------|-----------|
| C  | 3.521046  | 1.635201  | -0.066719 |
| C  | 3.583395  | -0.550632 | -1.267486 |
| C  | -1.404097 | -0.088771 | -0.028024 |
| C  | 1.485973  | 0.088336  | -0.044769 |
| C  | -2.938277 | -0.190582 | -0.006630 |
| C  | 3.015540  | 0.184817  | -0.031974 |
| C  | 3.562256  | -0.482620 | 1.250577  |
| H  | -3.101450 | 0.014859  | 2.162336  |
| H  | -3.154776 | 1.563419  | 1.276649  |
| H  | -3.208415 | 1.525915  | -1.326465 |
| H  | -4.580993 | 0.484808  | 1.278487  |
| H  | 4.687116  | -0.523654 | -1.258281 |
| H  | -3.105448 | -2.206205 | -0.863923 |
| H  | -4.632101 | 0.433320  | -1.246364 |
| H  | -4.536706 | -1.654416 | 0.042005  |
| H  | -3.076520 | -2.181082 | 0.915701  |
| H  | -3.181429 | -0.042854 | -2.173209 |
| H  | 1.113885  | 2.210762  | -0.117114 |
| H  | 3.189662  | 2.161974  | -0.974886 |
| H  | 3.174288  | 2.210207  | 0.806280  |
| H  | 4.665963  | -0.454903 | 1.258007  |
| H  | 3.198808  | 0.049827  | 2.143667  |
| H  | 3.223797  | -1.525758 | 1.297541  |
| H  | 3.244002  | -1.594678 | -1.262513 |
| H  | -1.036634 | -2.217533 | 0.028711  |
| H  | 3.234876  | -0.067737 | -2.194048 |
| H  | 4.623171  | 1.638927  | -0.056957 |
| O  | -1.410142 | 2.335427  | -0.186635 |
| O  | 1.490246  | -2.328869 | 0.027534  |
| Na | -1.628137 | 4.200543  | 0.799709  |

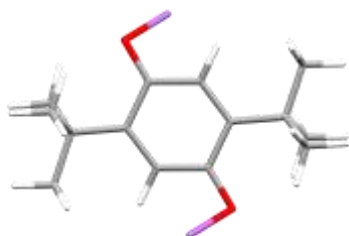

| <i>Element</i> | <i>X</i>  | <i>Y</i>  | <i>Z</i>  |
|----------------|-----------|-----------|-----------|
| C              | -3.456845 | -1.667884 | -0.136584 |
| C              | 0.605997  | 1.198640  | 0.166605  |
| C              | -0.605997 | -1.198640 | -0.166611 |
| C              | -0.827478 | 1.194696  | 0.167808  |

|    |           |           |           |
|----|-----------|-----------|-----------|
| C  | 0.827479  | -1.194696 | -0.167812 |
| C  | -3.535654 | 0.350858  | 1.324720  |
| C  | -3.556179 | 0.588844  | -1.183907 |
| C  | 3.456844  | 1.667885  | 0.136578  |
| C  | 3.535655  | -0.350859 | -1.324724 |
| C  | -1.446257 | -0.088080 | 0.007480  |
| C  | 1.446257  | 0.088079  | -0.007485 |
| C  | -2.975367 | -0.215366 | 0.001434  |
| C  | 2.975367  | 0.215366  | -0.001439 |
| C  | 3.556179  | -0.588842 | 1.183903  |
| H  | -3.179217 | -0.246264 | 2.179231  |
| H  | -3.204752 | 1.388742  | 1.459759  |
| H  | -3.271522 | 1.644935  | -1.084922 |
| H  | -4.637622 | 0.318314  | 1.322614  |
| H  | 4.637623  | -0.318314 | -1.322618 |
| H  | -3.132226 | -2.127449 | -1.082690 |
| H  | -4.656126 | 0.518830  | -1.198973 |
| H  | -4.556933 | -1.693209 | -0.113706 |
| H  | -3.097199 | -2.297515 | 0.693995  |
| H  | -3.176426 | 0.195062  | -2.140025 |
| H  | 1.062363  | 2.162990  | 0.432763  |
| H  | 3.097199  | 2.297514  | -0.694002 |
| H  | 3.132225  | 2.127451  | 1.082682  |
| H  | 4.656125  | -0.518827 | 1.198970  |
| H  | 3.176425  | -0.195060 | 2.140021  |
| H  | 3.271523  | -1.644934 | 1.084919  |
| H  | 3.204754  | -1.388743 | -1.459763 |
| H  | -1.062363 | -2.162991 | -0.432770 |
| H  | 3.179219  | 0.246262  | -2.179235 |
| H  | 4.556933  | 1.693210  | 0.113699  |
| O  | -1.499185 | 2.336767  | 0.254700  |
| O  | 1.499185  | -2.336767 | -0.254704 |
| Na | -0.306797 | 3.064623  | -1.350072 |
| Na | 0.306792  | -3.064627 | 1.350064  |

B3LYP/def2TZVP

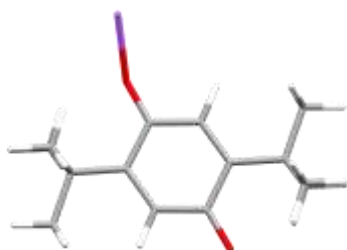

| <i>Element</i> | <i>X</i>  | <i>Y</i>  | <i>Z</i>  |
|----------------|-----------|-----------|-----------|
| C              | -3.433220 | -1.639764 | 0.015760  |
| C              | 0.671014  | 1.202045  | -0.085916 |
| C              | -0.598465 | -1.213818 | 0.006033  |
| C              | -0.750684 | 1.191362  | -0.094115 |
| C              | 0.840517  | -1.221028 | -0.000993 |
| C              | -3.472952 | 0.508547  | 1.258841  |
| C              | -3.523044 | 0.487209  | -1.262803 |
| C              | 3.516089  | 1.630229  | -0.070573 |
| C              | 3.578476  | -0.552167 | -1.266233 |
| C              | -1.398194 | -0.088869 | -0.025913 |
| C              | 1.479845  | 0.086563  | -0.041489 |
| C              | -2.931825 | -0.186842 | -0.006100 |
| C              | 3.008906  | 0.180709  | -0.031766 |
| C              | 3.561841  | -0.478856 | 1.250523  |
| H              | -3.099440 | 0.007292  | 2.155257  |
| H              | -3.155262 | 1.549556  | 1.289166  |
| H              | -3.213582 | 1.528350  | -1.317385 |
| H              | -4.567758 | 0.477343  | 1.280564  |
| H              | 4.673974  | -0.517809 | -1.259619 |
| H              | -3.106368 | -2.192205 | -0.867290 |
| H              | -4.617679 | 0.435211  | -1.244545 |
| H              | -4.527177 | -1.646142 | 0.031392  |
| H              | -3.082054 | -2.176606 | 0.899021  |
| H              | -3.173316 | -0.023439 | -2.163708 |
| H              | 1.103781  | 2.195344  | -0.111759 |
| H              | 3.185921  | 2.150977  | -0.972328 |
| H              | 3.174540  | 2.202387  | 0.795557  |
| H              | 4.657325  | -0.443968 | 1.255969  |
| H              | 3.200234  | 0.052283  | 2.135304  |
| H              | 3.235785  | -1.515471 | 1.307188  |
| H              | 3.251868  | -1.590304 | -1.265690 |
| H              | -1.029752 | -2.205374 | 0.033644  |
| H              | 3.228421  | -0.074009 | -2.185187 |
| H              | 4.609972  | 1.633881  | -0.063242 |
| O              | -1.401540 | 2.325275  | -0.172418 |
| O              | 1.481208  | -2.316175 | 0.034784  |
| Na             | -1.635172 | 4.179375  | 0.759690  |

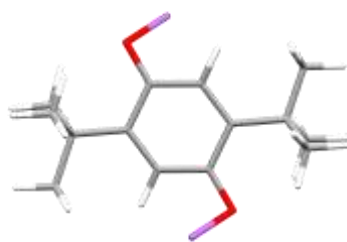

| <i>Element</i> | <i>X</i>  | <i>Y</i>  | <i>Z</i>  |
|----------------|-----------|-----------|-----------|
| C              | -3.451039 | -1.660087 | -0.137791 |
| C              | 0.605065  | 1.192088  | 0.167336  |
| C              | -0.605065 | -1.192088 | -0.167340 |
| C              | -0.818868 | 1.185849  | 0.167967  |
| C              | 0.818868  | -1.185849 | -0.167970 |
| C              | -3.531277 | 0.353147  | 1.323111  |
| C              | -3.551826 | 0.593248  | -1.183180 |
| C              | 3.451039  | 1.660087  | 0.137787  |
| C              | 3.531278  | -0.353145 | -1.323117 |
| C              | -1.439579 | -0.085103 | 0.005657  |
| C              | 1.439579  | 0.085103  | -0.005663 |
| C              | -2.968288 | -0.208203 | 0.000581  |
| C              | 2.968288  | 0.208203  | -0.000587 |
| C              | 3.551825  | -0.593250 | 1.183173  |
| H              | -3.173781 | -0.239061 | 2.170264  |
| H              | -3.213205 | 1.384433  | 1.462180  |
| H              | -3.287233 | 1.644495  | -1.084157 |
| H              | -4.624822 | 0.312023  | 1.320866  |
| H              | 4.624823  | -0.312019 | -1.320871 |
| H              | -3.130372 | -2.114211 | -1.077818 |
| H              | -4.642361 | 0.508209  | -1.205115 |
| H              | -4.542700 | -1.685598 | -0.113314 |
| H              | -3.092223 | -2.285540 | 0.684794  |
| H              | -3.164530 | 0.210259  | -2.131474 |
| H              | 1.052981  | 2.151734  | 0.418702  |
| H              | 3.092213  | 2.285542  | -0.684792 |
| H              | 3.130383  | 2.114207  | 1.077819  |
| H              | 4.642361  | -0.508214 | 1.205108  |
| H              | 3.164530  | -0.210261 | 2.131468  |
| H              | 3.287229  | -1.644496 | 1.084150  |
| H              | 3.213207  | -1.384431 | -1.462188 |
| H              | -1.052981 | -2.151735 | -0.418707 |
| H              | 3.173782  | 0.239064  | -2.170270 |
| H              | 4.542700  | 1.685599  | 0.113298  |
| O              | -1.482552 | 2.327168  | 0.252957  |
| O              | 1.482552  | -2.327169 | -0.252958 |
| Na             | -0.344773 | 3.065662  | -1.357672 |

Na | 0.344771 -3.065661 1.357672

B3LYP/def2TZVP (CPCM – DME)

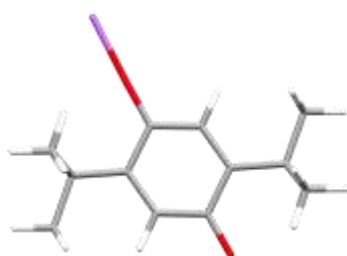

| <i>Element</i> | <i>X</i>  | <i>Y</i>  | <i>Z</i>  |
|----------------|-----------|-----------|-----------|
| C              | -3.418149 | -1.615851 | 0.021630  |
| C              | 0.682659  | 1.192541  | -0.000261 |
| C              | -0.567583 | -1.206104 | -0.002222 |
| C              | -0.729155 | 1.211159  | 0.012795  |
| C              | 0.854747  | -1.238181 | -0.015450 |
| C              | -3.465411 | 0.511575  | 1.294444  |
| C              | -3.488547 | 0.525708  | -1.226168 |
| C              | 3.536259  | 1.604872  | -0.024128 |
| C              | 3.577861  | -0.529742 | -1.294189 |
| C              | -1.371862 | -0.060331 | 0.011572  |
| C              | 1.490249  | 0.051106  | -0.014060 |
| C              | -2.907444 | -0.165683 | 0.025074  |
| C              | 3.023573  | 0.156230  | -0.027536 |
| C              | 3.600931  | -0.543825 | 1.220975  |
| H              | -3.123767 | -0.019077 | 2.187327  |
| H              | -3.120682 | 1.542114  | 1.353050  |
| H              | -3.144847 | 1.556876  | -1.279531 |
| H              | -4.560847 | 0.498588  | 1.293707  |
| H              | 4.673456  | -0.517215 | -1.296164 |
| H              | -3.093088 | -2.159527 | -0.867651 |
| H              | -4.583786 | 0.512599  | -1.205470 |
| H              | -4.511876 | -1.616484 | 0.031663  |
| H              | -3.076880 | -2.169430 | 0.898645  |
| H              | -3.163403 | 0.005138  | -2.131065 |
| H              | 1.142499  | 2.174540  | 0.001019  |
| H              | 3.196317  | 2.159614  | -0.901721 |
| H              | 3.212529  | 2.149718  | 0.865710  |
| H              | 4.696380  | -0.531210 | 1.202993  |
| H              | 3.273307  | -0.030488 | 2.129668  |
| H              | 3.253560  | -1.574935 | 1.255379  |
| H              | 3.229813  | -1.560438 | -1.333758 |
| H              | -1.029570 | -2.186319 | -0.003472 |
| H              | 3.233675  | -0.006297 | -2.190915 |

|    |           |           |           |
|----|-----------|-----------|-----------|
| H  | 4.629952  | 1.604330  | -0.034163 |
| O  | -1.379295 | 2.373294  | 0.025267  |
| O  | 1.498585  | -2.375407 | -0.027725 |
| Na | -2.327928 | 4.217632  | 0.044355  |

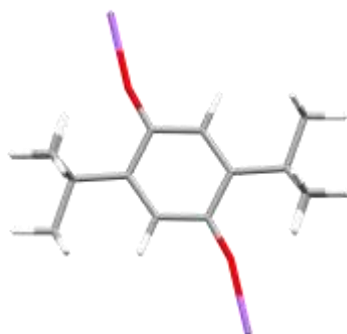

| <i>Element</i> | <i>X</i>  | <i>Y</i>  | <i>Z</i>  |
|----------------|-----------|-----------|-----------|
| C              | -3.482905 | -1.594083 | -0.023988 |
| C              | 0.631521  | 1.196275  | -0.018491 |
| C              | -0.631521 | -1.196276 | 0.018487  |
| C              | -0.781188 | 1.218602  | -0.045058 |
| C              | 0.781189  | -1.218602 | 0.045053  |
| C              | -3.554058 | 0.574441  | 1.180705  |
| C              | -3.507696 | 0.511041  | -1.338020 |
| C              | 3.482905  | 1.594083  | 0.023986  |
| C              | 3.554058  | -0.574438 | -1.180711 |
| C              | -1.432130 | -0.050367 | -0.025097 |
| C              | 1.432130  | 0.050366  | 0.025092  |
| C              | -2.966616 | -0.146505 | -0.050922 |
| C              | 2.966616  | 0.146505  | 0.050917  |
| C              | 3.507698  | -0.511043 | 1.338013  |
| H              | -3.234829 | 0.076004  | 2.100082  |
| H              | -3.212142 | 1.607217  | 1.209699  |
| H              | -3.163991 | 1.541368  | -1.406324 |
| H              | -4.648647 | 0.559745  | 1.152545  |
| H              | 4.648647  | -0.559740 | -1.152553 |
| H              | -3.136713 | -2.166008 | -0.887564 |
| H              | -4.602594 | 0.496764  | -1.349433 |
| H              | -4.575993 | -1.590716 | -0.044193 |
| H              | -3.169238 | -2.121532 | 0.879408  |
| H              | -3.155331 | -0.032707 | -2.218802 |
| H              | 1.095406  | 2.175277  | -0.034596 |
| H              | 3.169238  | 2.121534  | -0.879409 |
| H              | 3.136713  | 2.166007  | 0.887564  |
| H              | 4.602595  | -0.496766 | 1.349426  |
| H              | 3.155332  | 0.032702  | 2.218797  |
| H              | 3.163993  | -1.541371 | 1.406315  |
| H              | 3.212143  | -1.607214 | -1.209708 |

|    |           |           |           |
|----|-----------|-----------|-----------|
| H  | -1.095406 | -2.175277 | 0.034591  |
| H  | 3.234828  | -0.076000 | -2.100088 |
| H  | 4.575993  | 1.590717  | 0.044191  |
| O  | -1.425629 | 2.373705  | -0.085999 |
| O  | 1.425629  | -2.373706 | 0.085991  |
| Na | -1.906926 | 4.406067  | -0.146021 |
| Na | 1.906917  | -4.406070 | 0.146021  |

## Potassium

*Singly Reduced*

PBE/def2TZVP

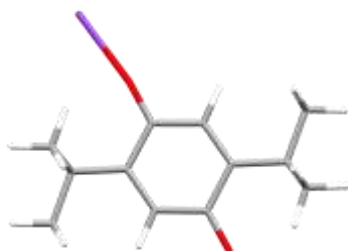

| <i>Element</i> | <i>X</i>  | <i>Y</i>  | <i>Z</i>  |
|----------------|-----------|-----------|-----------|
| C              | -3.426959 | -1.658219 | -0.000955 |
| C              | 0.758235  | 1.125685  | 0.000115  |
| C              | -0.586167 | -1.282443 | -0.000133 |
| C              | -0.676162 | 1.129760  | -0.000313 |
| C              | 0.865143  | -1.303494 | 0.000301  |
| C              | -3.455281 | 0.475628  | 1.266358  |
| C              | -3.454524 | 0.475466  | -1.268559 |
| C              | 3.601001  | 1.504785  | 0.000937  |
| C              | 3.620171  | -0.647841 | -1.260824 |
| C              | -1.366183 | -0.147180 | -0.000437 |
| C              | 1.547210  | -0.002424 | 0.000422  |
| C              | -2.901313 | -0.213440 | -0.000891 |
| C              | 3.075893  | 0.060716  | 0.000873  |
| C              | 3.619420  | -0.647681 | 1.262984  |
| H              | -3.138274 | -0.068150 | 2.168200  |
| H              | -3.072889 | 1.502080  | 1.351335  |
| H              | -3.072080 | 1.501906  | -1.353440 |
| H              | -4.557604 | 0.493595  | 1.248664  |
| H              | 4.721573  | -0.613693 | -1.265039 |
| H              | -3.094899 | -2.212048 | -0.890811 |
| H              | -4.556858 | 0.493437  | -1.251525 |
| H              | -4.527986 | -1.649067 | -0.001290 |
| H              | -3.095440 | -2.211931 | 0.889175  |

|   |           |           |           |
|---|-----------|-----------|-----------|
| H | -3.136980 | -0.068428 | -2.170142 |
| H | 1.206169  | 2.121718  | 0.000186  |
| H | 3.274385  | 2.060482  | -0.891565 |
| H | 3.273855  | 2.060595  | 0.893175  |
| H | 4.720819  | -0.613530 | 1.267851  |
| H | 3.258296  | -0.146100 | 2.174091  |
| H | 3.294987  | -1.694757 | 1.285053  |
| H | 3.295751  | -1.694919 | -1.282954 |
| H | -1.032089 | -2.277988 | -0.000204 |
| H | 3.259591  | -0.146376 | -2.172210 |
| H | 4.701374  | 1.490998  | 0.001265  |
| O | -1.303171 | 2.270338  | -0.000573 |
| O | 1.475019  | -2.412082 | 0.000552  |
| K | -2.692490 | 4.139092  | -0.001108 |

B3LYP/def2TZVP

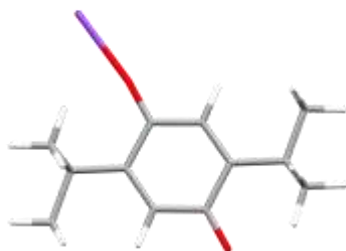

| <i>Element</i> | <i>X</i>  | <i>Y</i>  | <i>Z</i>  |
|----------------|-----------|-----------|-----------|
| C              | -3.425366 | -1.654014 | -0.000955 |
| C              | 0.757059  | 1.119527  | 0.000113  |
| C              | -0.586515 | -1.277735 | -0.000134 |
| C              | -0.672718 | 1.121926  | -0.000313 |
| C              | 0.860076  | -1.295829 | 0.000296  |
| C              | -3.450556 | 0.475848  | 1.265278  |
| C              | -3.449803 | 0.475687  | -1.267473 |
| C              | 3.598176  | 1.500916  | 0.000935  |
| C              | 3.616512  | -0.646688 | -1.260084 |
| C              | -1.361315 | -0.148957 | -0.000437 |
| C              | 1.542010  | -0.001114 | 0.000419  |
| C              | -2.895774 | -0.211173 | -0.000889 |
| C              | 3.070696  | 0.058152  | 0.000871  |
| C              | 3.615760  | -0.646526 | 1.262241  |
| H              | -3.134428 | -0.064178 | 2.159695  |
| H              | -3.078618 | 1.495485  | 1.353232  |
| H              | -3.077812 | 1.495313  | -1.355336 |
| H              | -4.544647 | 0.489563  | 1.247777  |
| H              | 4.709442  | -0.605938 | -1.266610 |
| H              | -3.097902 | -2.204321 | -0.884198 |

|   |           |           |           |
|---|-----------|-----------|-----------|
| H | -4.543903 | 0.489404  | -1.250626 |
| H | -4.518063 | -1.642063 | -0.001282 |
| H | -3.098429 | -2.204208 | 0.882554  |
| H | -3.133142 | -0.064452 | -2.161634 |
| H | 1.196053  | 2.108356  | 0.000182  |
| H | 3.274587  | 2.052290  | -0.884820 |
| H | 3.274058  | 2.052404  | 0.886427  |
| H | 4.708686  | -0.605774 | 1.269414  |
| H | 3.253031  | -0.149349 | 2.165449  |
| H | 3.302875  | -1.687439 | 1.288316  |
| H | 3.303642  | -1.687604 | -1.286212 |
| H | -1.024187 | -2.265985 | -0.000202 |
| H | 3.254322  | -0.149626 | -2.163572 |
| H | 4.690166  | 1.486521  | 0.001263  |
| O | -1.295560 | 2.255201  | -0.000570 |
| O | 1.465129  | -2.395615 | 0.000548  |
| K | -2.681999 | 4.126485  | -0.001102 |

B3LYP/def2TZVP (CPCM – DME)

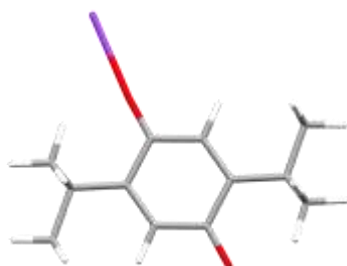

| <i>Element</i> | <i>X</i>  | <i>Y</i>  | <i>Z</i>  |
|----------------|-----------|-----------|-----------|
| C              | -3.424863 | -1.691131 | -0.000957 |
| C              | 0.742001  | 1.105892  | 0.000105  |
| C              | -0.590554 | -1.291390 | -0.000133 |
| C              | -0.695820 | 1.113344  | -0.000331 |
| C              | 0.853847  | -1.306154 | 0.000303  |
| C              | -3.465752 | 0.447693  | 1.261943  |
| C              | -3.464996 | 0.447522  | -1.264171 |
| C              | 3.577725  | 1.508781  | 0.000939  |
| C              | 3.616083  | -0.634586 | -1.260676 |
| C              | -1.376699 | -0.170221 | -0.000447 |
| C              | 1.531389  | -0.012647 | 0.000420  |
| C              | -2.908904 | -0.243573 | -0.000901 |
| C              | 3.061577  | 0.061590  | 0.000878  |
| C              | 3.615320  | -0.634420 | 1.262858  |
| H              | -3.114029 | -0.062018 | 2.162139  |
| H              | -3.149953 | 1.486981  | 1.310534  |
| H              | -3.149169 | 1.486805  | -1.312712 |

|   |           |           |           |
|---|-----------|-----------|-----------|
| H | -4.558627 | 0.411696  | 1.259687  |
| H | 4.708668  | -0.590791 | -1.263024 |
| H | -3.095967 | -2.240181 | -0.885371 |
| H | -4.557872 | 0.411524  | -1.262565 |
| H | -4.516989 | -1.684863 | -0.001284 |
| H | -3.096496 | -2.240062 | 0.883728  |
| H | -3.112733 | -0.062310 | -2.164087 |
| H | 1.182567  | 2.094171  | 0.000171  |
| H | 3.250031  | 2.058060  | -0.884211 |
| H | 3.249491  | 2.058178  | 0.885815  |
| H | 4.707904  | -0.590620 | 1.265863  |
| H | 3.255607  | -0.133138 | 2.164978  |
| H | 3.305938  | -1.676276 | 1.297722  |
| H | 3.306717  | -1.676445 | -1.295592 |
| H | -1.031649 | -2.278974 | -0.000198 |
| H | 3.256918  | -0.133421 | -2.163079 |
| H | 4.669751  | 1.502011  | 0.001272  |
| O | -1.312257 | 2.233260  | -0.000593 |
| O | 1.465833  | -2.414004 | 0.000561  |
| K | -2.312495 | 4.534208  | -0.001026 |

*Doubly Reduced*

PBE/def2TZVP

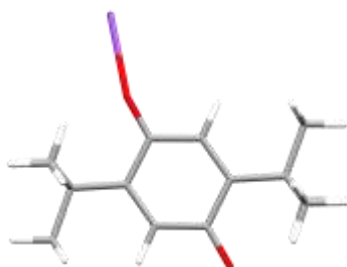

| <i>Element</i> | <i>X</i>  | <i>Y</i>  | <i>Z</i>  |
|----------------|-----------|-----------|-----------|
| C              | -3.435686 | -1.610847 | -0.005382 |
| C              | 0.700498  | 1.205703  | 0.073151  |
| C              | -0.592921 | -1.211273 | -0.009390 |
| C              | -0.729705 | 1.210610  | 0.087010  |
| C              | 0.850813  | -1.231500 | -0.011223 |
| C              | -3.496944 | 0.516926  | 1.281728  |
| C              | -3.464270 | 0.546402  | -1.242920 |
| C              | 3.551692  | 1.604555  | 0.040867  |
| C              | 3.570519  | -0.514116 | -1.275536 |
| C              | -1.388143 | -0.074914 | 0.028280  |
| C              | 1.501875  | 0.076177  | 0.024148  |
| C              | -2.923139 | -0.161712 | 0.017433  |
| C              | 3.032541  | 0.158948  | 0.007748  |

|   |           |           |           |
|---|-----------|-----------|-----------|
| C | 3.596167  | -0.581424 | 1.242216  |
| H | -3.154779 | -0.010956 | 2.185422  |
| H | -3.154239 | 1.557610  | 1.338867  |
| H | -3.114190 | 1.587221  | -1.271765 |
| H | -4.600891 | 0.493832  | 1.265669  |
| H | 4.674587  | -0.498209 | -1.285000 |
| H | -3.090753 | -2.151714 | -0.899289 |
| H | -4.567869 | 0.540453  | -1.253341 |
| H | -4.538074 | -1.608630 | -0.013881 |
| H | -3.103874 | -2.173159 | 0.880294  |
| H | -3.108022 | 0.034657  | -2.150350 |
| H | 1.149205  | 2.203077  | 0.095771  |
| H | 3.206595  | 2.182666  | -0.830801 |
| H | 3.228350  | 2.134115  | 0.950324  |
| H | 4.700187  | -0.565168 | 1.231229  |
| H | 3.253744  | -0.095199 | 2.169380  |
| H | 3.246263  | -1.622116 | 1.237562  |
| H | 3.220385  | -1.553523 | -1.321149 |
| H | -1.039626 | -2.207383 | -0.034650 |
| H | 3.210952  | 0.022020  | -2.168036 |
| H | 4.653855  | 1.598252  | 0.027009  |
| O | -1.371791 | 2.352367  | 0.154194  |
| O | 1.486464  | -2.341846 | -0.047636 |
| K | -1.826692 | 4.623281  | -0.518378 |

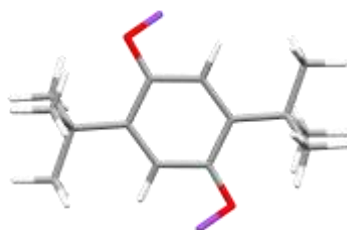

| <i>Element</i> | <i>X</i>  | <i>Y</i>  | <i>Z</i>  |
|----------------|-----------|-----------|-----------|
| C              | -3.479669 | -1.611277 | -0.225304 |
| C              | 0.622412  | 1.185973  | 0.232508  |
| C              | -0.622412 | -1.185973 | -0.232514 |
| C              | -0.809015 | 1.196000  | 0.250121  |
| C              | 0.809015  | -1.196000 | -0.250125 |
| C              | -3.525877 | 0.319288  | 1.355259  |
| C              | -3.550947 | 0.705773  | -1.130345 |
| C              | 3.479669  | 1.611277  | 0.225295  |
| C              | 3.525876  | -0.319289 | -1.355266 |
| C              | -1.442716 | -0.072175 | 0.007683  |
| C              | 1.442716  | 0.072175  | -0.007689 |

|   |           |           |           |
|---|-----------|-----------|-----------|
| C | -2.975042 | -0.178004 | 0.000729  |
| C | 2.975042  | 0.178004  | -0.000736 |
| C | 3.550949  | -0.705771 | 1.130339  |
| H | -3.183806 | -0.338029 | 2.170808  |
| H | -3.168573 | 1.338874  | 1.551721  |
| H | -3.266714 | 1.752069  | -0.947761 |
| H | -4.628685 | 0.312058  | 1.353810  |
| H | 4.628684  | -0.312060 | -1.353818 |
| H | -3.158810 | -2.017273 | -1.196603 |
| H | -4.651176 | 0.641467  | -1.158952 |
| H | -4.580435 | -1.621688 | -0.203024 |
| H | -3.127048 | -2.295951 | 0.562660  |
| H | -3.168086 | 0.374333  | -2.109864 |
| H | 1.082210  | 2.147092  | 0.492137  |
| H | 3.127047  | 2.295950  | -0.562669 |
| H | 3.158812  | 2.017274  | 1.196594  |
| H | 4.651177  | -0.641467 | 1.158944  |
| H | 3.168089  | -0.374330 | 2.109857  |
| H | 3.266714  | -1.752068 | 0.947757  |
| H | 3.168572  | -1.338876 | -1.551727 |
| H | -1.082209 | -2.147092 | -0.492143 |
| H | 3.183805  | 0.338026  | -2.170815 |
| H | 4.580435  | 1.621689  | 0.203013  |
| O | -1.462657 | 2.337619  | 0.384608  |
| O | 1.462656  | -2.337620 | -0.384610 |
| K | -0.555312 | 2.967996  | -1.797207 |
| K | 0.555309  | -2.967994 | 1.797204  |

B3LYP/def2TZVP

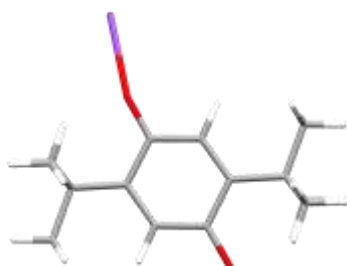

| <i>Element</i> | <i>X</i>  | <i>Y</i>  | <i>Z</i>  |
|----------------|-----------|-----------|-----------|
| C              | -3.433910 | -1.605084 | -0.002008 |
| C              | 0.697293  | 1.198312  | 0.065653  |
| C              | -0.592037 | -1.207891 | -0.008427 |
| C              | -0.725292 | 1.201811  | 0.079523  |
| C              | 0.846346  | -1.227616 | -0.009955 |
| C              | -3.492856 | 0.524031  | 1.274059  |

|   |           |           |           |
|---|-----------|-----------|-----------|
| C | -3.457555 | 0.542283  | -1.248454 |
| C | 3.546563  | 1.599519  | 0.035840  |
| C | 3.568979  | -0.517063 | -1.273722 |
| C | -1.381983 | -0.075210 | 0.026091  |
| C | 1.495680  | 0.073965  | 0.021593  |
| C | -2.916392 | -0.158023 | 0.014413  |
| C | 3.025812  | 0.154555  | 0.006492  |
| C | 3.592529  | -0.576893 | 1.243099  |
| H | -3.149308 | 0.006401  | 2.173306  |
| H | -3.162797 | 1.558909  | 1.328630  |
| H | -3.113622 | 1.574572  | -1.286929 |
| H | -4.588569 | 0.492843  | 1.259574  |
| H | 4.664918  | -0.493820 | -1.282315 |
| H | -3.093033 | -2.146659 | -0.886382 |
| H | -4.553141 | 0.533561  | -1.259100 |
| H | -4.528105 | -1.600282 | -0.011366 |
| H | -3.107252 | -2.159714 | 0.879787  |
| H | -3.103781 | 0.028205  | -2.145688 |
| H | 1.138706  | 2.187922  | 0.082631  |
| H | 3.205637  | 2.170429  | -0.831399 |
| H | 3.225295  | 2.127462  | 0.936641  |
| H | 4.688421  | -0.553227 | 1.233367  |
| H | 3.249580  | -0.090573 | 2.160534  |
| H | 3.255414  | -1.611745 | 1.248618  |
| H | 3.231326  | -1.550370 | -1.323680 |
| H | -1.032388 | -2.195802 | -0.031594 |
| H | 3.210407  | 0.013354  | -2.160211 |
| H | 4.640499  | 1.593239  | 0.023315  |
| O | -1.363821 | 2.341630  | 0.138681  |
| O | 1.478062  | -2.330049 | -0.042401 |
| K | -1.832540 | 4.612203  | -0.428642 |

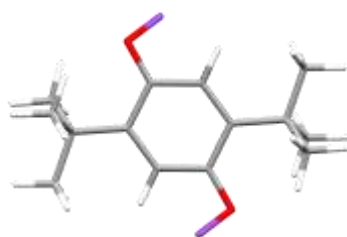

| <i>Element</i> | <i>X</i>  | <i>Y</i>  | <i>Z</i>  |
|----------------|-----------|-----------|-----------|
| C              | -3.472872 | -1.606179 | -0.221464 |
| C              | 0.620943  | 1.179153  | 0.230750  |
| C              | -0.620943 | -1.179153 | -0.230756 |
| C              | -0.801613 | 1.189334  | 0.238676  |

|   |           |           |           |
|---|-----------|-----------|-----------|
| C | 0.801613  | -1.189334 | -0.238682 |
| C | -3.518843 | 0.323050  | 1.352299  |
| C | -3.553329 | 0.703501  | -1.132448 |
| C | 3.472872  | 1.606178  | 0.221459  |
| C | 3.518842  | -0.323050 | -1.352305 |
| C | -1.436543 | -0.068359 | 0.001726  |
| C | 1.436543  | 0.068359  | -0.001733 |
| C | -2.968382 | -0.171866 | -0.001789 |
| C | 2.968382  | 0.171866  | 0.001783  |
| C | 3.553329  | -0.703501 | 1.132442  |
| H | -3.171780 | -0.326018 | 2.161535  |
| H | -3.176292 | 1.337301  | 1.549126  |
| H | -3.291544 | 1.746269  | -0.957353 |
| H | -4.613416 | 0.305022  | 1.353204  |
| H | 4.613415  | -0.305022 | -1.353211 |
| H | -3.159647 | -2.009722 | -1.186558 |
| H | -4.643960 | 0.620784  | -1.164057 |
| H | -4.565113 | -1.618434 | -0.193231 |
| H | -3.117408 | -2.283122 | 0.559941  |
| H | -3.165210 | 0.380739  | -2.103617 |
| H | 1.073466  | 2.132828  | 0.485719  |
| H | 3.117408  | 2.283122  | -0.559947 |
| H | 3.159648  | 2.009721  | 1.186552  |
| H | 4.643960  | -0.620784 | 1.164051  |
| H | 3.165210  | -0.380741 | 2.103610  |
| H | 3.291544  | -1.746270 | 0.957346  |
| H | 3.176292  | -1.337301 | -1.549133 |
| H | -1.073466 | -2.132828 | -0.485725 |
| H | 3.171780  | 0.326019  | -2.161541 |
| H | 4.565113  | 1.618434  | 0.193225  |
| O | -1.449097 | 2.329351  | 0.367691  |
| O | 1.449097  | -2.329351 | -0.367699 |
| K | -0.550200 | 3.032489  | -1.787562 |
| K | 0.550200  | -3.032489 | 1.787555  |

B3LYP/def2TZVP (CPCM – DME)

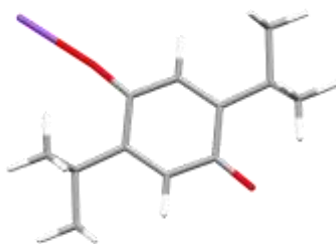

| <i>Element</i> | <i>X</i> | <i>Y</i> | <i>Z</i> |
|----------------|----------|----------|----------|
|----------------|----------|----------|----------|

|   |           |           |           |
|---|-----------|-----------|-----------|
| C | -2.109561 | -3.182026 | 0.001885  |
| C | 0.712902  | 0.911024  | -0.002775 |
| C | 0.407811  | -1.779194 | 0.001147  |
| C | -0.612957 | 0.422395  | -0.002767 |
| C | 1.746471  | -1.297823 | 0.001156  |
| C | -2.925507 | -1.208665 | 1.260189  |
| C | -2.924111 | -1.212502 | -1.263316 |
| C | 3.229967  | 2.317191  | -0.003517 |
| C | 4.047490  | 0.335590  | -1.258212 |
| C | -0.753656 | -0.996759 | -0.000687 |
| C | 1.875934  | 0.133682  | -0.000948 |
| C | -2.149704 | -1.645195 | -0.000474 |
| C | 3.270180  | 0.781005  | -0.001160 |
| C | 4.046095  | 0.339415  | 1.258102  |
| H | -2.435024 | -1.595003 | 2.157747  |
| H | -2.953223 | -0.122944 | 1.326734  |
| H | -2.951751 | -0.126989 | -1.333192 |
| H | -3.950258 | -1.595680 | 1.243190  |
| H | 5.065857  | 0.739917  | -1.250060 |
| H | -1.601996 | -3.576820 | -0.880480 |
| H | -3.948880 | -1.599466 | -1.246274 |
| H | -3.131256 | -3.572798 | 0.001914  |
| H | -1.602974 | -3.574135 | 0.886008  |
| H | -2.432634 | -1.601566 | -2.159152 |
| H | 0.792292  | 1.992702  | -0.004375 |
| H | 2.723581  | 2.710159  | -0.888160 |
| H | 2.722601  | 2.712846  | 0.879365  |
| H | 5.064471  | 0.743716  | 1.249849  |
| H | 3.546066  | 0.705448  | 2.159546  |
| H | 4.091100  | -0.747487 | 1.298682  |
| H | 4.092538  | -0.751430 | -1.295438 |
| H | 0.326174  | -2.860158 | 0.002745  |
| H | 3.548461  | 0.698880  | -2.161318 |
| H | 4.251424  | 2.708298  | -0.003545 |
| O | -1.639073 | 1.270209  | -0.004625 |
| O | 2.757627  | -2.126521 | 0.002976  |
| K | -3.671057 | 2.575341  | -0.007749 |

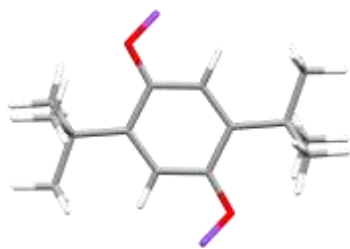

| <i>Element</i> | <i>X</i>  | <i>Y</i>  | <i>Z</i>  |
|----------------|-----------|-----------|-----------|
| C              | -3.472010 | -1.598634 | -0.242963 |
| C              | 0.626129  | 1.179204  | 0.207955  |
| C              | -0.626129 | -1.179204 | -0.207962 |
| C              | -0.793628 | 1.202205  | 0.211674  |
| C              | 0.793628  | -1.202205 | -0.211680 |
| C              | -3.518869 | 0.306235  | 1.352827  |
| C              | -3.561693 | 0.719910  | -1.126659 |
| C              | 3.472011  | 1.598633  | 0.242957  |
| C              | 3.518869  | -0.306234 | -1.352834 |
| C              | -1.435217 | -0.056439 | -0.007040 |
| C              | 1.435216  | 0.056440  | 0.007034  |
| C              | -2.968781 | -0.165217 | -0.009756 |
| C              | 2.968781  | 0.165217  | 0.009749  |
| C              | 3.561693  | -0.719911 | 1.126652  |
| H              | -3.167583 | -0.351369 | 2.152909  |
| H              | -3.181301 | 1.320095  | 1.559958  |
| H              | -3.284684 | 1.759348  | -0.962154 |
| H              | -4.613504 | 0.285099  | 1.356427  |
| H              | 4.613503  | -0.285099 | -1.356434 |
| H              | -3.158449 | -1.989188 | -1.213568 |
| H              | -4.653637 | 0.644451  | -1.140570 |
| H              | -4.564687 | -1.608781 | -0.218405 |
| H              | -3.117015 | -2.285238 | 0.528770  |
| H              | -3.190429 | 0.402243  | -2.105116 |
| H              | 1.089108  | 2.140023  | 0.405337  |
| H              | 3.117018  | 2.285238  | -0.528776 |
| H              | 3.158449  | 1.989188  | 1.213561  |
| H              | 4.653637  | -0.644451 | 1.140564  |
| H              | 3.190427  | -0.402246 | 2.105109  |
| H              | 3.284685  | -1.759349 | 0.962144  |
| H              | 3.181300  | -1.320094 | -1.559965 |
| H              | -1.089108 | -2.140023 | -0.405343 |
| H              | 3.167583  | 0.351370  | -2.152915 |
| H              | 4.564688  | 1.608780  | 0.218401  |
| O              | -1.435587 | 2.347457  | 0.362246  |
| O              | 1.435587  | -2.347457 | -0.362252 |
| K              | -0.651221 | 3.177986  | -1.956077 |
| K              | 0.651220  | -3.177985 | 1.956070  |

# Tetramethylammonium

*Singly Reduced*

PBE/def2TZVP

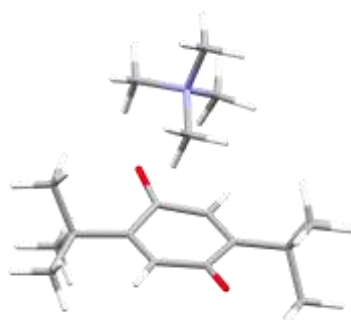

| <i>Element</i> | <i>X</i>  | <i>Y</i>  | <i>Z</i>  |
|----------------|-----------|-----------|-----------|
| C              | -3.448762 | -0.451584 | 0.707190  |
| C              | 0.892706  | 1.148675  | -1.187028 |
| C              | -0.598552 | -0.183682 | 0.704054  |
| C              | -0.528127 | 1.409067  | -1.118548 |
| C              | 0.848942  | -0.280365 | 0.779322  |
| C              | -3.403874 | 1.974117  | 0.145195  |
| C              | -3.292858 | 0.252926  | -1.682777 |
| C              | 3.729237  | 0.931585  | -1.588854 |
| C              | 3.493702  | -1.273910 | -0.448655 |
| C              | -1.305522 | 0.585588  | -0.196216 |
| C              | 1.603690  | 0.377010  | -0.294839 |
| C              | -2.840107 | 0.590249  | -0.244614 |
| C              | 3.125297  | 0.224498  | -0.366074 |
| C              | 3.755780  | 0.836916  | 0.905716  |
| H              | -3.051634 | 2.272020  | 1.146430  |
| H              | -3.097994 | 2.728833  | -0.588777 |
| H              | -2.893840 | 0.984609  | -2.396727 |
| H              | -4.504789 | 1.940807  | 0.173693  |
| H              | 4.588314  | -1.392988 | -0.489187 |
| H              | -3.086476 | -1.465743 | 0.484737  |
| H              | -4.392802 | 0.258780  | -1.745999 |
| H              | -4.543557 | -0.451734 | 0.595044  |
| H              | -3.221755 | -0.231875 | 1.761398  |
| H              | -2.939887 | -0.747959 | -1.972286 |
| H              | 1.400956  | 1.674442  | -1.998901 |
| H              | 3.320479  | 0.539689  | -2.532112 |
| H              | 3.554006  | 2.019334  | -1.568059 |
| H              | 4.850085  | 0.709175  | 0.890678  |
| H              | 3.548512  | 1.920203  | 0.956001  |
| H              | 3.350024  | 0.354051  | 1.803282  |
| H              | 3.107464  | -1.812055 | 0.425046  |

|   |           |           |           |
|---|-----------|-----------|-----------|
| H | -1.111499 | -0.784352 | 1.457058  |
| H | 3.067188  | -1.724321 | -1.357544 |
| H | 4.818119  | 0.773180  | -1.602201 |
| O | -1.023901 | 2.384936  | -1.799312 |
| O | 1.394523  | -0.920350 | 1.727588  |
| N | 0.302716  | 4.599614  | 0.619509  |
| C | -1.115232 | 4.851401  | 0.180724  |
| H | -1.756335 | 4.898787  | 1.068328  |
| H | -1.144996 | 5.803912  | -0.361975 |
| H | -1.407599 | 4.021691  | -0.483564 |
| C | 1.150208  | 4.433202  | -0.615584 |
| H | 1.202337  | 5.403343  | -1.124744 |
| H | 2.150702  | 4.102325  | -0.315399 |
| H | 0.660966  | 3.687434  | -1.261441 |
| C | 0.351211  | 3.345608  | 1.456150  |
| H | 1.393502  | 3.135662  | 1.719922  |
| H | -0.248042 | 3.512784  | 2.358594  |
| H | -0.056938 | 2.509491  | 0.878012  |
| C | 0.808041  | 5.748781  | 1.432991  |
| H | 1.842527  | 5.543833  | 1.732440  |
| H | 0.767353  | 6.661669  | 0.827740  |
| H | 0.177645  | 5.860813  | 2.322875  |

B3LYP/def2TZVP

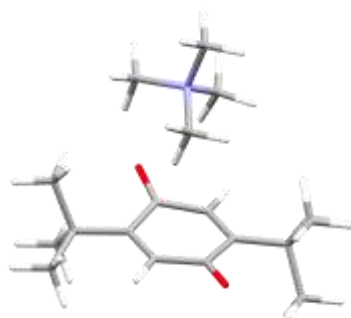

| <i>Element</i> | <i>X</i>  | <i>Y</i>  | <i>Z</i>  |
|----------------|-----------|-----------|-----------|
| C              | -3.456071 | -0.426103 | 0.716872  |
| C              | 0.885068  | 1.137816  | -1.196501 |
| C              | -0.604741 | -0.178726 | 0.693274  |
| C              | -0.532519 | 1.390613  | -1.133405 |
| C              | 0.838259  | -0.271137 | 0.767177  |
| C              | -3.392149 | 1.986034  | 0.114872  |
| C              | -3.301700 | 0.233460  | -1.681642 |
| C              | 3.721067  | 0.937200  | -1.587902 |
| C              | 3.494908  | -1.259605 | -0.439703 |
| C              | -1.306869 | 0.578871  | -0.206646 |
| C              | 1.592094  | 0.380092  | -0.302968 |

|   |           |           |           |
|---|-----------|-----------|-----------|
| C | -2.840449 | 0.593185  | -0.253471 |
| C | 3.114522  | 0.234334  | -0.364431 |
| C | 3.738573  | 0.859911  | 0.902093  |
| H | -3.030255 | 2.297450  | 1.099434  |
| H | -3.092657 | 2.720671  | -0.628000 |
| H | -2.906145 | 0.942165  | -2.406791 |
| H | -4.484479 | 1.960249  | 0.155239  |
| H | 4.582222  | -1.368989 | -0.482735 |
| H | -3.107308 | -1.439433 | 0.511489  |
| H | -4.393730 | 0.245009  | -1.739459 |
| H | -4.542986 | -0.418281 | 0.610032  |
| H | -3.224388 | -0.191798 | 1.758036  |
| H | -2.959400 | -0.767837 | -1.951368 |
| H | 1.384687  | 1.658836  | -2.002751 |
| H | 3.322954  | 0.539162  | -2.523138 |
| H | 3.539795  | 2.015301  | -1.574590 |
| H | 4.826019  | 0.745949  | 0.885952  |
| H | 3.520498  | 1.932953  | 0.945222  |
| H | 3.346253  | 0.384742  | 1.798390  |
| H | 3.120809  | -1.796615 | 0.428405  |
| H | -1.108178 | -0.770086 | 1.445578  |
| H | 3.073359  | -1.713540 | -1.339444 |
| H | 4.802740  | 0.787196  | -1.594485 |
| O | -1.027372 | 2.348563  | -1.818408 |
| O | 1.380120  | -0.898386 | 1.713268  |
| N | 0.313097  | 4.583817  | 0.627819  |
| C | -1.108473 | 4.823630  | 0.197667  |
| H | -1.739871 | 4.863220  | 1.082035  |
| H | -1.150448 | 5.770085  | -0.337631 |
| H | -1.400531 | 4.004531  | -0.459966 |
| C | 1.160090  | 4.435978  | -0.608733 |
| H | 1.199638  | 5.401744  | -1.108751 |
| H | 2.157536  | 4.119634  | -0.314763 |
| H | 0.690421  | 3.697180  | -1.255275 |
| C | 0.378435  | 3.326974  | 1.457548  |
| H | 1.415695  | 3.124514  | 1.709879  |
| H | -0.208781 | 3.483240  | 2.359394  |
| H | -0.026187 | 2.499715  | 0.886265  |
| C | 0.808237  | 5.732283  | 1.444990  |
| H | 1.837781  | 5.539150  | 1.738293  |
| H | 0.756932  | 6.642031  | 0.851289  |
| H | 0.185033  | 5.833167  | 2.330745  |

B3LYP/def2TZVP (CPCM – DME)

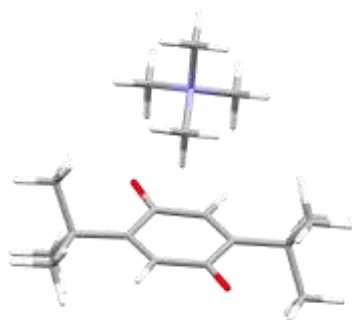

| <i>Element</i> | <i>X</i>  | <i>Y</i>  | <i>Z</i>  |
|----------------|-----------|-----------|-----------|
| C              | -3.453653 | -0.278344 | 0.949870  |
| C              | 0.807090  | 1.080898  | -1.322970 |
| C              | -0.608043 | -0.177254 | 0.659103  |
| C              | -0.627428 | 1.231758  | -1.299490 |
| C              | 0.832658  | -0.281887 | 0.670891  |
| C              | -3.363805 | 2.019874  | 0.006814  |
| C              | -3.463091 | 0.017402  | -1.520277 |
| C              | 3.646427  | 1.030078  | -1.716971 |
| C              | 3.492434  | -1.201258 | -0.630539 |
| C              | -1.352460 | 0.519798  | -0.254577 |
| C              | 1.553005  | 0.380357  | -0.411828 |
| C              | -2.884257 | 0.567580  | -0.199294 |
| C              | 3.079539  | 0.280782  | -0.501353 |
| C              | 3.720243  | 0.886690  | 0.765888  |
| H              | -2.985461 | 2.417875  | 0.951777  |
| H              | -3.024528 | 2.658607  | -0.804713 |
| H              | -3.116647 | 0.602722  | -2.368990 |
| H              | -4.455942 | 2.051697  | 0.045069  |
| H              | 4.581032  | -1.283301 | -0.691482 |
| H              | -3.175339 | -1.329917 | 0.857008  |
| H              | -4.555669 | 0.049611  | -1.493328 |
| H              | -4.544022 | -0.220293 | 0.934255  |
| H              | -3.116914 | 0.079270  | 1.925125  |
| H              | -3.159981 | -1.022168 | -1.666423 |
| H              | 1.280539  | 1.595106  | -2.149374 |
| H              | 3.255835  | 0.635481  | -2.656953 |
| H              | 3.427775  | 2.099403  | -1.679412 |
| H              | 4.808429  | 0.792649  | 0.716786  |
| H              | 3.481595  | 1.949748  | 0.847879  |
| H              | 3.363490  | 0.381005  | 1.659826  |
| H              | 3.144661  | -1.775786 | 0.224686  |
| H              | -1.084252 | -0.712049 | 1.469776  |
| H              | 3.070032  | -1.637246 | -1.539159 |
| H              | 4.732456  | 0.918003  | -1.735119 |
| O              | -1.189151 | 1.987524  | -2.153837 |
| O              | 1.404239  | -0.932545 | 1.595224  |

|   |           |          |           |
|---|-----------|----------|-----------|
| N | 0.394876  | 4.584747 | 0.732731  |
| C | -0.789555 | 4.716228 | -0.185106 |
| H | -1.691038 | 4.777086 | 0.418049  |
| H | -0.671039 | 5.623447 | -0.771838 |
| H | -0.833923 | 3.847861 | -0.838601 |
| C | 1.641623  | 4.444223 | -0.091463 |
| H | 1.737166  | 5.316297 | -0.732525 |
| H | 2.496739  | 4.373393 | 0.574970  |
| H | 1.556870  | 3.541248 | -0.688603 |
| C | 0.229887  | 3.366291 | 1.597845  |
| H | 1.097468  | 3.279406 | 2.246043  |
| H | -0.671342 | 3.483141 | 2.192937  |
| H | 0.148657  | 2.490901 | 0.962098  |
| C | 0.500052  | 5.802629 | 1.601572  |
| H | 1.351663  | 5.686374 | 2.266550  |
| H | 0.636541  | 6.675570 | 0.969145  |
| H | -0.414324 | 5.899411 | 2.180604  |

*Doubly Reduced*

PBE/def2TZVP

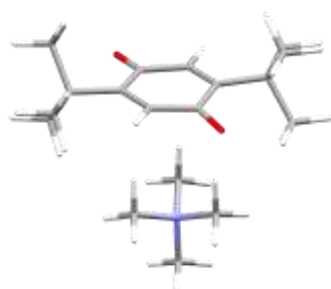

| <i>Element</i> | <i>X</i>  | <i>Y</i>  | <i>Z</i>  |
|----------------|-----------|-----------|-----------|
| C              | -3.491541 | 0.210282  | 1.675216  |
| C              | 0.512433  | 1.604613  | -0.956133 |
| C              | -0.632975 | 0.369914  | 1.190955  |
| C              | -0.924788 | 1.512426  | -0.971392 |
| C              | 0.797706  | 0.365460  | 1.141196  |
| C              | -3.571211 | 2.301037  | 0.318180  |
| C              | -3.626535 | 0.062694  | -0.816952 |
| C              | 3.325462  | 2.168526  | -1.230180 |
| C              | 3.620601  | -0.055271 | -0.147022 |
| C              | -1.493564 | 0.903491  | 0.216511  |
| C              | 1.366685  | 1.091383  | 0.030169  |
| C              | -3.021823 | 0.857086  | 0.363741  |
| C              | 2.890451  | 1.301532  | -0.038793 |
| C              | 3.349316  | 2.001827  | 1.260089  |
| H              | -3.193559 | 2.876750  | 1.177880  |

|   |           |           |           |
|---|-----------|-----------|-----------|
| H | -3.229696 | 2.778341  | -0.611982 |
| H | -3.259228 | 0.504661  | -1.755875 |
| H | -4.676152 | 2.304797  | 0.354335  |
| H | 4.716204  | 0.088273  | -0.172349 |
| H | -3.175991 | -0.843330 | 1.756216  |
| H | -4.731155 | 0.094370  | -0.792806 |
| H | -4.593467 | 0.231679  | 1.723425  |
| H | -3.100679 | 0.743989  | 2.555042  |
| H | -3.320749 | -0.997104 | -0.768492 |
| H | 0.922653  | 2.130140  | -1.822813 |
| H | 3.068349  | 1.700480  | -2.193256 |
| H | 2.850663  | 3.160562  | -1.202621 |
| H | 4.447568  | 2.126013  | 1.272760  |
| H | 2.887482  | 2.998598  | 1.334735  |
| H | 3.036900  | 1.399276  | 2.125165  |
| H | 3.352644  | -0.670465 | 0.723070  |
| H | -1.040522 | -0.071843 | 2.108340  |
| H | 3.326894  | -0.576548 | -1.074279 |
| H | 4.419278  | 2.309976  | -1.201899 |
| O | -1.621443 | 1.964499  | -1.964269 |
| O | 1.506638  | -0.294762 | 2.043242  |
| N | 0.173891  | -2.893433 | -0.373885 |
| C | 0.220371  | -4.202854 | -1.097992 |
| H | 0.159284  | -5.016399 | -0.364020 |
| H | -0.621963 | -4.262505 | -1.797704 |
| H | 1.168419  | -4.260124 | -1.647817 |
| C | 1.344380  | -2.780067 | 0.579012  |
| H | 1.310788  | -1.827289 | 1.195764  |
| H | 1.315976  | -3.664658 | 1.231663  |
| H | 2.260955  | -2.788745 | -0.024689 |
| C | -1.099047 | -2.790396 | 0.411475  |
| H | -1.111473 | -1.782185 | 0.861292  |
| H | -1.946668 | -2.912524 | -0.274995 |
| H | -1.102250 | -3.573780 | 1.179643  |
| C | 0.215072  | -1.759787 | -1.373595 |
| H | 1.122753  | -1.872177 | -1.978214 |
| H | -0.684074 | -1.819893 | -1.999619 |
| H | 0.248914  | -0.807915 | -0.825491 |

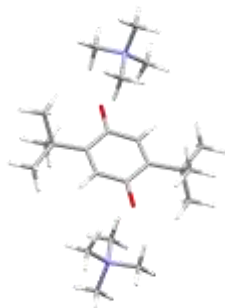

| <i>Element</i> | <i>X</i>  | <i>Y</i>  | <i>Z</i>  |
|----------------|-----------|-----------|-----------|
| C              | -3.763958 | -0.470950 | 0.256888  |
| C              | 0.945414  | 0.778135  | -0.724958 |
| C              | -0.919951 | -0.705130 | 0.566301  |
| C              | -0.412481 | 1.172114  | -0.899157 |
| C              | 0.438417  | -1.086612 | 0.755729  |
| C              | -3.281398 | 1.965407  | 0.194006  |
| C              | -3.223342 | 0.606758  | -1.921954 |
| C              | 3.792921  | 0.487314  | -0.485103 |
| C              | 3.256937  | -1.936165 | -0.379001 |
| C              | -1.383314 | 0.350588  | -0.231973 |
| C              | 1.408038  | -0.279617 | 0.070023  |
| C              | -2.889626 | 0.601640  | -0.413722 |
| C              | 2.912827  | -0.556298 | 0.222051  |
| C              | 3.284096  | -0.548096 | 1.721402  |
| H              | -3.039840 | 1.993656  | 1.268673  |
| H              | -2.731725 | 2.762513  | -0.318347 |
| H              | -2.598274 | 1.347000  | -2.439272 |
| H              | -4.362614 | 2.152886  | 0.079385  |
| H              | 4.333662  | -2.154556 | -0.277426 |
| H              | -3.544758 | -1.475115 | -0.139710 |
| H              | -4.288491 | 0.843956  | -2.085940 |
| H              | -4.825892 | -0.256002 | 0.057704  |
| H              | -3.625570 | -0.498231 | 1.348535  |
| H              | -3.023148 | -0.385030 | -2.357846 |
| H              | 1.669085  | 1.377995  | -1.280969 |
| H              | 3.623233  | 0.506718  | -1.572302 |
| H              | 3.610193  | 1.500844  | -0.094092 |
| H              | 4.347617  | -0.806494 | 1.862471  |
| H              | 3.117770  | 0.454537  | 2.147213  |
| H              | 2.655571  | -1.265920 | 2.265268  |
| H              | 2.690131  | -2.713296 | 0.145787  |
| H              | -1.645737 | -1.310186 | 1.113936  |
| H              | 2.999079  | -1.964790 | -1.449631 |
| H              | 4.854724  | 0.248737  | -0.313967 |
| O              | -0.704577 | 2.266489  | -1.594455 |

|   |           |           |           |
|---|-----------|-----------|-----------|
| O | 0.734195  | -2.160872 | 1.482628  |
| N | 0.363826  | 4.669800  | 0.274473  |
| N | -0.388644 | -4.721302 | -0.071143 |
| C | -0.961173 | 4.939822  | -0.390865 |
| H | -1.695066 | 5.197282  | 0.382287  |
| H | -0.829841 | 5.777347  | -1.087354 |
| H | -1.217577 | 3.996913  | -0.923899 |
| C | 0.195146  | 3.547849  | 1.266046  |
| H | 1.163437  | 3.360056  | 1.744758  |
| H | -0.549024 | 3.853782  | 2.011037  |
| H | -0.131664 | 2.648262  | 0.726756  |
| C | 1.332790  | 4.237574  | -0.797718 |
| H | 1.516702  | 5.097165  | -1.454849 |
| H | 2.263954  | 3.914235  | -0.317498 |
| H | 0.820978  | 3.403825  | -1.339815 |
| C | 0.859935  | 5.889305  | 0.976755  |
| H | 1.830564  | 5.665794  | 1.435995  |
| H | 0.970751  | 6.701735  | 0.249220  |
| H | 0.137308  | 6.177321  | 1.750397  |
| C | -0.906185 | -5.996328 | -0.647874 |
| H | -0.971083 | -6.748693 | 0.146723  |
| H | -1.901116 | -5.816986 | -1.073150 |
| H | -0.220456 | -6.340113 | -1.432272 |
| C | 0.972332  | -4.928049 | 0.542682  |
| H | 1.251847  | -3.940725 | 0.971838  |
| H | 0.884783  | -5.700116 | 1.317277  |
| H | 1.664489  | -5.252866 | -0.243603 |
| C | -1.307156 | -4.210132 | 1.010998  |
| H | -0.784021 | -3.318744 | 1.440466  |
| H | -2.270787 | -3.950481 | 0.556322  |
| H | -1.434962 | -5.008465 | 1.753213  |
| C | -0.282488 | -3.678257 | -1.153677 |
| H | 0.428257  | -4.034050 | -1.909151 |
| H | -1.275304 | -3.537445 | -1.597081 |
| H | 0.060212  | -2.739222 | -0.698569 |

B3LYP/def2TZVP

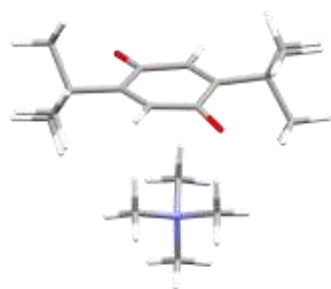

| <i>Element</i> | <i>X</i>  | <i>Y</i>  | <i>Z</i>  |
|----------------|-----------|-----------|-----------|
| C              | -3.491538 | 0.222279  | 1.665936  |
| C              | 0.509825  | 1.617689  | -0.941486 |
| C              | -0.638055 | 0.400570  | 1.196336  |
| C              | -0.918051 | 1.522163  | -0.962656 |
| C              | 0.780595  | 0.384402  | 1.144846  |
| C              | -3.590741 | 2.295923  | 0.294400  |
| C              | -3.611357 | 0.045024  | -0.817564 |
| C              | 3.323451  | 2.166327  | -1.209855 |
| C              | 3.596488  | -0.066177 | -0.151480 |
| C              | -1.490899 | 0.922234  | 0.216524  |
| C              | 1.355116  | 1.101937  | 0.044856  |
| C              | -3.019097 | 0.862714  | 0.352028  |
| C              | 2.880511  | 1.295095  | -0.024584 |
| C              | 3.356998  | 1.981590  | 1.273400  |
| H              | -3.225765 | 2.878403  | 1.144730  |
| H              | -3.264601 | 2.774801  | -0.628495 |
| H              | -3.264551 | 0.471342  | -1.759154 |
| H              | -4.687505 | 2.281729  | 0.332853  |
| H              | 4.683851  | 0.068348  | -0.204892 |
| H              | -3.167563 | -0.818692 | 1.757358  |
| H              | -4.708127 | 0.054144  | -0.788250 |
| H              | -4.585635 | 0.231409  | 1.706278  |
| H              | -3.116282 | 0.764088  | 2.536639  |
| H              | -3.287174 | -1.000034 | -0.755614 |
| H              | 0.918141  | 2.137348  | -1.799730 |
| H              | 3.065078  | 1.710457  | -2.168566 |
| H              | 2.861196  | 3.154481  | -1.175279 |
| H              | 4.448371  | 2.095874  | 1.275224  |
| H              | 2.909358  | 2.975288  | 1.356281  |
| H              | 3.053293  | 1.386918  | 2.134580  |
| H              | 3.352580  | -0.680411 | 0.713146  |
| H              | -1.044190 | -0.044483 | 2.100045  |
| H              | 3.278154  | -0.579399 | -1.065393 |
| H              | 4.410200  | 2.297913  | -1.181524 |
| O              | -1.607894 | 1.960566  | -1.960364 |
| O              | 1.479683  | -0.298743 | 2.033615  |

|   |           |           |           |
|---|-----------|-----------|-----------|
| N | 0.182614  | -2.886438 | -0.374973 |
| C | 0.201195  | -4.192725 | -1.092122 |
| H | 0.142069  | -5.000696 | -0.365059 |
| H | -0.646663 | -4.244693 | -1.772721 |
| H | 1.129429  | -4.270222 | -1.654787 |
| C | 1.376114  | -2.782066 | 0.547754  |
| H | 1.345201  | -1.844323 | 1.163210  |
| H | 1.365721  | -3.661840 | 1.192196  |
| H | 2.271493  | -2.784184 | -0.070652 |
| C | -1.069712 | -2.774068 | 0.439253  |
| H | -1.076884 | -1.779421 | 0.887079  |
| H | -1.928376 | -2.893823 | -0.218333 |
| H | -1.059012 | -3.549552 | 1.203130  |
| C | 0.213975  | -1.760715 | -1.381505 |
| H | 1.096485  | -1.889335 | -2.004268 |
| H | -0.692910 | -1.806195 | -1.980303 |
| H | 0.273575  | -0.814202 | -0.852103 |

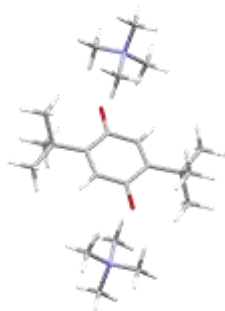

| <i>Element</i> | <i>X</i>  | <i>Y</i>  | <i>Z</i>  |
|----------------|-----------|-----------|-----------|
| C              | -3.775314 | -0.412610 | 0.431561  |
| C              | 0.930327  | 0.736789  | -0.644058 |
| C              | -0.930268 | -0.736728 | 0.643809  |
| C              | -0.418651 | 1.134912  | -0.806681 |
| C              | 0.418711  | -1.134841 | 0.806444  |
| C              | -3.216903 | 2.002589  | 0.346129  |
| C              | -3.274038 | 0.637085  | -1.764974 |
| C              | 3.775373  | 0.412617  | -0.431877 |
| C              | 3.216923  | -2.002571 | -0.346368 |
| C              | -1.386102 | 0.332045  | -0.130766 |
| C              | 1.386160  | -0.331986 | 0.130514  |
| C              | -2.888011 | 0.627690  | -0.270799 |
| C              | 2.888067  | -0.627649 | 0.270528  |
| C              | 3.274121  | -0.637011 | 1.764697  |
| H              | -2.956056 | 2.016157  | 1.408146  |
| H              | -2.653591 | 2.776214  | -0.167211 |
| H              | -2.658791 | 1.353047  | -2.306912 |
| H              | -4.284756 | 2.227786  | 0.255024  |

|   |           |           |           |
|---|-----------|-----------|-----------|
| H | 4.284777  | -2.227774 | -0.255296 |
| H | -3.606824 | -1.416301 | 0.033546  |
| H | -4.331087 | 0.896293  | -1.890131 |
| H | -4.827810 | -0.163723 | 0.270961  |
| H | -3.600245 | -0.442186 | 1.509016  |
| H | -3.115696 | -0.353924 | -2.199532 |
| H | 1.645767  | 1.335490  | -1.191950 |
| H | 3.600281  | 0.442167  | -1.509329 |
| H | 3.606909  | 1.416322  | -0.033886 |
| H | 4.331167  | -0.896234 | 1.889842  |
| H | 3.115804  | 0.354012  | 2.199232  |
| H | 2.658871  | -1.352949 | 2.306664  |
| H | 2.653623  | -2.776174 | 0.167018  |
| H | -1.645710 | -1.335433 | 1.191694  |
| H | 2.956036  | -2.016170 | -1.408376 |
| H | 4.827868  | 0.163716  | -0.271292 |
| O | -0.708315 | 2.225029  | -1.497548 |
| O | 0.708378  | -2.224944 | 1.497336  |
| N | 0.322963  | 4.744485  | 0.169362  |
| N | -0.323025 | -4.744530 | -0.169259 |
| C | -0.961794 | 5.003712  | -0.573124 |
| H | -1.713983 | 5.332802  | 0.141115  |
| H | -0.776821 | 5.782671  | -1.310777 |
| H | -1.231746 | 4.051387  | -1.047689 |
| C | 0.083638  | 3.687367  | 1.215378  |
| H | 1.017208  | 3.509182  | 1.744154  |
| H | -0.678049 | 4.050512  | 1.902137  |
| H | -0.242782 | 2.777939  | 0.719440  |
| C | 1.338801  | 4.236781  | -0.822198 |
| H | 1.567567  | 5.044856  | -1.515336 |
| H | 2.232849  | 3.937199  | -0.279908 |
| H | 0.860190  | 3.385412  | -1.331010 |
| C | 0.808896  | 5.992149  | 0.822475  |
| H | 1.744835  | 5.782888  | 1.336591  |
| H | 0.968991  | 6.754384  | 0.063097  |
| H | 0.063744  | 6.335490  | 1.537654  |
| C | -0.809038 | -5.992228 | -0.822246 |
| H | -0.969080 | -6.754410 | -0.062803 |
| H | -1.745018 | -5.782985 | -1.336293 |
| H | -0.063955 | -6.335631 | -1.537468 |
| C | 0.961795  | -5.003727 | 0.573125  |
| H | 1.231817  | -4.051373 | 1.047587  |
| H | 0.776877  | -5.782623 | 1.310858  |
| H | 1.713909  | -5.332889 | -0.141160 |
| C | -1.338766 | -4.236744 | 0.822361  |
| H | -0.860097 | -3.385336 | 1.331059  |
| H | -2.232864 | -3.937198 | 0.280133  |
| H | -1.567471 | -5.044767 | 1.515580  |

|   |           |           |           |
|---|-----------|-----------|-----------|
| C | -0.083774 | -3.687482 | -1.215364 |
| H | 0.677834  | -4.050693 | -1.902176 |
| H | -1.017391 | -3.509301 | -1.744058 |
| H | 0.242722  | -2.778037 | -0.719509 |

B3LYP/def2TZVP (CPCM – DME)

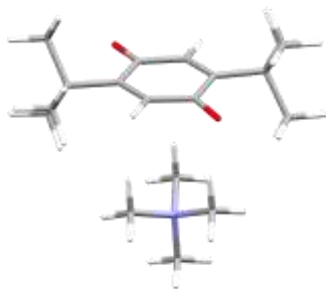

| <i>Element</i> | <i>X</i>  | <i>Y</i>  | <i>Z</i>  |
|----------------|-----------|-----------|-----------|
| C              | -3.476782 | 0.217062  | 1.680515  |
| C              | 0.513311  | 1.690790  | -0.895917 |
| C              | -0.636649 | 0.480231  | 1.229968  |
| C              | -0.908566 | 1.617804  | -0.908850 |
| C              | 0.782855  | 0.506397  | 1.213492  |
| C              | -3.627076 | 2.313489  | 0.359897  |
| C              | -3.592739 | 0.080325  | -0.798625 |
| C              | 3.336201  | 2.115132  | -1.266735 |
| C              | 3.559539  | -0.054023 | -0.080951 |
| C              | -1.489967 | 0.993674  | 0.245439  |
| C              | 1.364038  | 1.181766  | 0.091071  |
| C              | -3.018267 | 0.895201  | 0.379753  |
| C              | 2.891185  | 1.334842  | -0.019749 |
| C              | 3.419260  | 2.093344  | 1.215930  |
| H              | -3.282608 | 2.885007  | 1.226472  |
| H              | -3.320588 | 2.832258  | -0.546825 |
| H              | -3.270102 | 0.521276  | -1.740147 |
| H              | -4.721089 | 2.268478  | 0.398744  |
| H              | 4.649879  | 0.041857  | -0.124610 |
| H              | -3.124665 | -0.814288 | 1.755065  |
| H              | -4.687524 | 0.061563  | -0.762642 |
| H              | -4.569695 | 0.193937  | 1.713112  |
| H              | -3.128415 | 0.755067  | 2.564743  |
| H              | -3.240302 | -0.953618 | -0.755568 |
| H              | 0.935381  | 2.189061  | -1.760932 |
| H              | 3.035515  | 1.614743  | -2.189889 |
| H              | 2.924652  | 3.126454  | -1.282269 |
| H              | 4.511817  | 2.169545  | 1.188403  |
| H              | 3.011333  | 3.107628  | 1.241087  |
| H              | 3.119142  | 1.572342  | 2.123383  |

|   |           |           |           |
|---|-----------|-----------|-----------|
| H | 3.285421  | -0.632870 | 0.798178  |
| H | -1.058857 | 0.003530  | 2.108013  |
| H | 3.235291  | -0.594018 | -0.975016 |
| H | 4.426699  | 2.198350  | -1.273531 |
| O | -1.596139 | 2.102896  | -1.911345 |
| O | 1.474552  | -0.088106 | 2.165338  |
| N | 0.173006  | -2.967355 | -0.416306 |
| C | 0.273058  | -4.279113 | -1.129881 |
| H | 0.215373  | -5.083229 | -0.400765 |
| H | -0.547473 | -4.359517 | -1.838276 |
| H | 1.223469  | -4.320368 | -1.655545 |
| C | 1.308058  | -2.832326 | 0.563813  |
| H | 1.227983  | -1.887675 | 1.110564  |
| H | 1.261852  | -3.676114 | 1.248927  |
| H | 2.240834  | -2.858300 | 0.006871  |
| C | -1.127322 | -2.894441 | 0.326153  |
| H | -1.189964 | -1.914500 | 0.791853  |
| H | -1.941469 | -3.028437 | -0.381275 |
| H | -1.147345 | -3.682440 | 1.074658  |
| C | 0.231430  | -1.843168 | -1.414604 |
| H | 1.173852  | -1.910896 | -1.951497 |
| H | -0.601441 | -1.953456 | -2.104415 |
| H | 0.168234  | -0.897172 | -0.885292 |

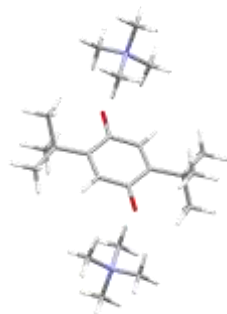

| <i>Element</i> | <i>X</i>  | <i>Y</i>  | <i>Z</i>  |
|----------------|-----------|-----------|-----------|
| C              | -3.767904 | -0.345795 | 0.563374  |
| C              | 0.922859  | 0.714452  | -0.677784 |
| C              | -0.922859 | -0.714449 | 0.677691  |
| C              | -0.428091 | 1.111901  | -0.843291 |
| C              | 0.428091  | -1.111899 | 0.843198  |
| C              | -3.197231 | 2.051739  | 0.276707  |
| C              | -3.323366 | 0.526964  | -1.718005 |
| C              | 3.767904  | 0.345796  | -0.563468 |
| C              | 3.197229  | -2.051738 | -0.276800 |
| C              | -1.388307 | 0.335177  | -0.121312 |
| C              | 1.388307  | -0.335174 | 0.121219  |
| C              | -2.893402 | 0.630950  | -0.239480 |

|   |           |           |           |
|---|-----------|-----------|-----------|
| C | 2.893402  | -0.630948 | 0.239386  |
| C | 3.323366  | -0.526962 | 1.717911  |
| H | -2.924157 | 2.142735  | 1.331506  |
| H | -2.630296 | 2.781766  | -0.293626 |
| H | -2.727520 | 1.203524  | -2.327788 |
| H | -4.264213 | 2.279305  | 0.182959  |
| H | 4.264212  | -2.279304 | -0.183053 |
| H | -3.629717 | -1.378481 | 0.235740  |
| H | -4.383080 | 0.778650  | -1.832584 |
| H | -4.821547 | -0.090137 | 0.422586  |
| H | -3.555794 | -0.299839 | 1.633737  |
| H | -3.178711 | -0.493577 | -2.083673 |
| H | 1.634710  | 1.306936  | -1.238117 |
| H | 3.555793  | 0.299840  | -1.633831 |
| H | 3.629717  | 1.378482  | -0.235835 |
| H | 4.383080  | -0.778647 | 1.832489  |
| H | 3.178712  | 0.493579  | 2.083579  |
| H | 2.727521  | -1.203521 | 2.327695  |
| H | 2.630295  | -2.781764 | 0.293534  |
| H | -1.634711 | -1.306933 | 1.238024  |
| H | 2.924155  | -2.142734 | -1.331598 |
| H | 4.821547  | 0.090137  | -0.422681 |
| O | -0.722795 | 2.161440  | -1.589167 |
| O | 0.722794  | -2.161437 | 1.589075  |
| N | 0.320907  | 4.845724  | 0.213356  |
| N | -0.320908 | -4.845725 | -0.213439 |
| C | -0.910782 | 5.119317  | -0.605262 |
| H | -1.698744 | 5.465645  | 0.058910  |
| H | -0.673570 | 5.889321  | -1.335551 |
| H | -1.178444 | 4.180078  | -1.091689 |
| C | 0.005349  | 3.794454  | 1.240799  |
| H | 0.900716  | 3.606748  | 1.827933  |
| H | -0.791228 | 4.164005  | 1.881456  |
| H | -0.303752 | 2.892816  | 0.720971  |
| C | 1.393751  | 4.324928  | -0.703084 |
| H | 1.656053  | 5.111838  | -1.406436 |
| H | 2.259731  | 4.053795  | -0.104560 |
| H | 0.973780  | 3.458894  | -1.218137 |
| C | 0.779307  | 6.096567  | 0.892323  |
| H | 1.674769  | 5.877376  | 1.468406  |
| H | 0.998288  | 6.848111  | 0.138173  |
| H | -0.009844 | 6.450516  | 1.551068  |
| C | -0.779308 | -6.096569 | -0.892403 |
| H | -0.998289 | -6.848112 | -0.138252 |
| H | -1.674771 | -5.877379 | -1.468486 |
| H | 0.009843  | -6.450519 | -1.551148 |
| C | 0.910782  | -5.119317 | 0.605179  |
| H | 1.178444  | -4.180076 | 1.091603  |

|   |           |           |           |
|---|-----------|-----------|-----------|
| H | 0.673570  | -5.889319 | 1.335470  |
| H | 1.698743  | -5.465646 | -0.058993 |
| C | -1.393751 | -4.324927 | 0.703001  |
| H | -0.973780 | -3.458892 | 1.218051  |
| H | -2.259732 | -4.053795 | 0.104476  |
| H | -1.656053 | -5.111835 | 1.406355  |
| C | -0.005351 | -3.794458 | -1.240884 |
| H | 0.791226  | -4.164010 | -1.881541 |
| H | -0.900717 | -3.606752 | -1.828018 |
| H | 0.303752  | -2.892818 | -0.721059 |

## Hydrogen

*Singly Reduced*

PBE/def2TZVP

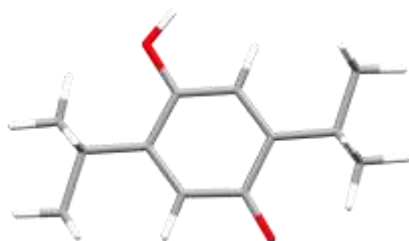

| <i>Element</i> | <i>X</i>  | <i>Y</i>  | <i>Z</i>  |
|----------------|-----------|-----------|-----------|
| C              | -3.447480 | -1.765114 | -0.000164 |
| C              | 0.654166  | 1.128520  | 0.000152  |
| C              | -0.628683 | -1.316083 | -0.000123 |
| C              | -0.755648 | 1.045286  | 0.000144  |
| C              | 0.824396  | -1.291287 | -0.000127 |
| C              | -3.548568 | 0.375301  | 1.267190  |
| C              | -3.548576 | 0.375588  | -1.267034 |
| C              | 3.478177  | 1.598979  | 0.000209  |
| C              | 3.567339  | -0.553788 | -1.264146 |
| C              | -1.445346 | -0.205434 | 0.000006  |
| C              | 1.482686  | 0.025217  | 0.000022  |
| C              | -2.977909 | -0.301085 | 0.000000  |
| C              | 3.003549  | 0.137390  | 0.000032  |
| C              | 3.567345  | -0.554097 | 1.264038  |
| H              | -3.158406 | -0.110255 | 2.173901  |
| H              | -3.300744 | 1.442231  | 1.312111  |
| H              | -3.300752 | 1.442528  | -1.311714 |
| H              | -4.644887 | 0.278605  | 1.275778  |
| H              | 4.665138  | -0.472350 | -1.269446 |
| H              | -3.102393 | -2.308205 | -0.892129 |

|   |           |           |           |
|---|-----------|-----------|-----------|
| H | -4.644895 | 0.278894  | -1.275636 |
| H | -4.546736 | -1.789321 | -0.000161 |
| H | -3.102382 | -2.308408 | 0.891672  |
| H | -3.158420 | -0.109763 | -2.173857 |
| H | 1.086212  | 2.134221  | 0.000270  |
| H | 3.138509  | 2.144264  | -0.893972 |
| H | 3.138516  | 2.144046  | 0.894526  |
| H | 4.665144  | -0.472662 | 1.269352  |
| H | 3.185784  | -0.070820 | 2.176153  |
| H | 3.291006  | -1.614398 | 1.284416  |
| H | 3.291001  | -1.614084 | -1.284780 |
| H | -1.048982 | -2.321075 | -0.000237 |
| H | 3.185772  | -0.070289 | -2.176141 |
| H | 4.577356  | 1.621609  | 0.000208  |
| O | -1.483629 | 2.198108  | 0.000281  |
| O | 1.462610  | -2.377286 | -0.000254 |
| H | -0.864827 | 2.951924  | 0.000310  |

B3LYP/def2TZVP

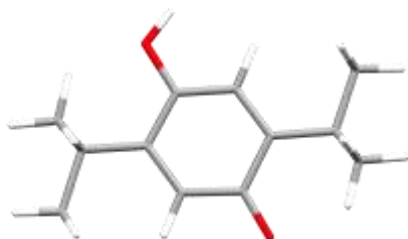

| <i>Element</i> | <i>X</i>  | <i>Y</i>  | <i>Z</i>  |
|----------------|-----------|-----------|-----------|
| C              | -3.446282 | -1.762175 | -0.000169 |
| C              | 0.651494  | 1.122800  | 0.000152  |
| C              | -0.628251 | -1.312649 | -0.000125 |
| C              | -0.752884 | 1.038071  | 0.000147  |
| C              | 0.819914  | -1.283358 | -0.000127 |
| C              | -3.540774 | 0.375837  | 1.265631  |
| C              | -3.540780 | 0.376129  | -1.265477 |
| C              | 3.475598  | 1.594644  | 0.000197  |
| C              | 3.563152  | -0.553260 | -1.263269 |
| C              | -1.439220 | -0.207871 | 0.000005  |
| C              | 1.476915  | 0.026258  | 0.000022  |
| C              | -2.971756 | -0.300612 | -0.000002 |
| C              | 2.998622  | 0.134379  | 0.000030  |
| C              | 3.563159  | -0.553551 | 1.263168  |
| H              | -3.153611 | -0.107310 | 2.165188  |
| H              | -3.292021 | 1.433509  | 1.309632  |

|   |           |           |           |
|---|-----------|-----------|-----------|
| H | -3.292025 | 1.433810  | -1.309235 |
| H | -4.629076 | 0.282557  | 1.275189  |
| H | 4.652261  | -0.466959 | -1.271495 |
| H | -3.105403 | -2.301719 | -0.885503 |
| H | -4.629082 | 0.282853  | -1.275050 |
| H | -4.537240 | -1.783658 | -0.000168 |
| H | -3.105397 | -2.301923 | 0.885039  |
| H | -3.153622 | -0.106812 | -2.165147 |
| H | 1.074074  | 2.120868  | 0.000266  |
| H | 3.138316  | 2.135522  | -0.887061 |
| H | 3.138322  | 2.135318  | 0.887581  |
| H | 4.652268  | -0.467251 | 1.271409  |
| H | 3.180129  | -0.074593 | 2.167307  |
| H | 3.296622  | -1.607021 | 1.286878  |
| H | 3.296613  | -1.606725 | -1.287221 |
| H | -1.039164 | -2.310785 | -0.000240 |
| H | 3.180118  | -0.074093 | -2.167296 |
| H | 4.566379  | 1.616372  | 0.000195  |
| O | -1.479309 | 2.184963  | 0.000282  |
| O | 1.453513  | -2.360637 | -0.000252 |
| H | -0.886129 | 2.945978  | 0.000368  |

B3LYP/def2TZVP (CPCM – DME)

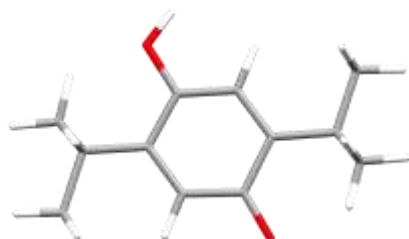

| <i>Element</i> | <i>X</i>  | <i>Y</i>  | <i>Z</i>  |
|----------------|-----------|-----------|-----------|
| C              | -3.448295 | -1.761537 | -0.000166 |
| C              | 0.655386  | 1.119820  | 0.000151  |
| C              | -0.630671 | -1.313293 | -0.000124 |
| C              | -0.751135 | 1.039745  | 0.000146  |
| C              | 0.816492  | -1.286020 | -0.000125 |
| C              | -3.540484 | 0.376214  | 1.266022  |
| C              | -3.540490 | 0.376502  | -1.265868 |
| C              | 3.472880  | 1.593921  | 0.000202  |
| C              | 3.566765  | -0.551090 | -1.263872 |
| C              | -1.439611 | -0.208090 | 0.000005  |
| C              | 1.476429  | 0.020916  | 0.000023  |
| C              | -2.971867 | -0.300451 | -0.000002 |
| C              | 2.999057  | 0.132380  | 0.000031  |

|   |           |           |           |
|---|-----------|-----------|-----------|
| C | 3.566775  | -0.551389 | 1.263768  |
| H | -3.154846 | -0.109012 | 2.165211  |
| H | -3.289598 | 1.433362  | 1.311046  |
| H | -3.289604 | 1.433660  | -1.310654 |
| H | -4.628756 | 0.283806  | 1.273043  |
| H | 4.655550  | -0.461993 | -1.270433 |
| H | -3.108195 | -2.301072 | -0.885906 |
| H | -4.628762 | 0.284095  | -1.272906 |
| H | -4.539193 | -1.780011 | -0.000165 |
| H | -3.108190 | -2.301273 | 0.885449  |
| H | -3.154857 | -0.108521 | -2.165169 |
| H | 1.077740  | 2.116455  | 0.000264  |
| H | 3.132775  | 2.133553  | -0.886153 |
| H | 3.132782  | 2.133343  | 0.886686  |
| H | 4.655560  | -0.462291 | 1.270342  |
| H | 3.183205  | -0.070414 | 2.166451  |
| H | 3.303318  | -1.605762 | 1.292001  |
| H | 3.303306  | -1.605456 | -1.292354 |
| H | -1.048231 | -2.308902 | -0.000237 |
| H | 3.183190  | -0.069901 | -2.166439 |
| H | 4.563740  | 1.616124  | 0.000200  |
| O | -1.474214 | 2.179590  | 0.000276  |
| O | 1.448065  | -2.370355 | -0.000253 |
| H | -0.890573 | 2.950250  | 0.000358  |

*Doubly Reduced*

PBE/def2TZVP

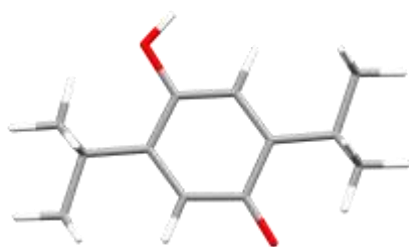

| <i>Element</i> | <i>X</i>  | <i>Y</i>  | <i>Z</i>  |
|----------------|-----------|-----------|-----------|
| C              | -3.446962 | -1.672377 | -0.000041 |
| C              | 0.608016  | 1.223780  | -0.000067 |
| C              | -0.605615 | -1.225237 | 0.000070  |
| C              | -0.787095 | 1.154152  | -0.000121 |
| C              | 0.835295  | -1.220222 | 0.000131  |
| C              | -3.547719 | 0.466113  | 1.262939  |
| C              | -3.547613 | 0.465960  | -1.263287 |
| C              | 3.457270  | 1.687004  | 0.000026  |
| C              | 3.536784  | -0.467066 | -1.258132 |

|   |           |           |           |
|---|-----------|-----------|-----------|
| C | -1.433798 | -0.097400 | -0.000052 |
| C | 1.443731  | 0.103483  | 0.000054  |
| C | -2.969205 | -0.210781 | -0.000109 |
| C | 2.970707  | 0.229908  | 0.000108  |
| C | 3.536682  | -0.466891 | 1.258491  |
| H | -3.165464 | -0.032718 | 2.166699  |
| H | -3.264106 | 1.524954  | 1.309881  |
| H | -3.263995 | 1.524795  | -1.310333 |
| H | -4.649582 | 0.394957  | 1.269465  |
| H | 4.641508  | -0.451707 | -1.249673 |
| H | -3.093140 | -2.214455 | -0.889149 |
| H | -4.649476 | 0.394805  | -1.269897 |
| H | -4.549238 | -1.696511 | -0.000086 |
| H | -3.093215 | -2.214348 | 0.889163  |
| H | -3.165283 | -0.032980 | -2.166956 |
| H | 1.051240  | 2.228689  | -0.000124 |
| H | 3.112283  | 2.233584  | -0.892551 |
| H | 3.112209  | 2.233709  | 0.892499  |
| H | 4.641406  | -0.451533 | 1.250120  |
| H | 3.190223  | 0.048234  | 2.168851  |
| H | 3.182324  | -1.507102 | 1.278937  |
| H | 3.182428  | -1.507280 | -1.278462 |
| H | -1.041353 | -2.225799 | 0.000130  |
| H | 3.190399  | 0.047931  | -2.168591 |
| H | 4.559634  | 1.706751  | 0.000070  |
| O | -1.541599 | 2.351391  | -0.000246 |
| O | 1.506028  | -2.314542 | 0.000244  |
| H | -0.883923 | 3.067121  | -0.000300 |

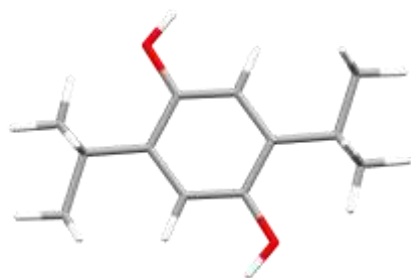

| <i>Element</i> | <i>X</i>  | <i>Y</i>  | <i>Z</i>  |
|----------------|-----------|-----------|-----------|
| C              | -3.445246 | -1.669035 | -0.000030 |
| C              | 0.618211  | 1.214046  | -0.000058 |
| C              | -0.618211 | -1.214047 | 0.000058  |
| C              | -0.777943 | 1.152550  | -0.000113 |
| C              | 0.777943  | -1.152550 | 0.000113  |
| C              | -3.555653 | 0.470163  | 1.265768  |

|   |           |           |           |
|---|-----------|-----------|-----------|
| C | -3.555547 | 0.469990  | -1.266129 |
| C | 3.445245  | 1.669035  | 0.000025  |
| C | 3.555651  | -0.470166 | -1.265769 |
| C | -1.448374 | -0.086569 | -0.000054 |
| C | 1.448374  | 0.086568  | 0.000055  |
| C | -2.979539 | -0.203412 | -0.000110 |
| C | 2.979539  | 0.203412  | 0.000109  |
| C | 3.555549  | -0.469988 | 1.266128  |
| H | -3.172032 | -0.020897 | 2.172550  |
| H | -3.294429 | 1.533713  | 1.312903  |
| H | -3.294318 | 1.533535  | -1.313387 |
| H | -4.653314 | 0.383112  | 1.269305  |
| H | 4.653312  | -0.383115 | -1.269307 |
| H | -3.101174 | -2.211525 | -0.893603 |
| H | -4.653208 | 0.382939  | -1.269745 |
| H | -4.544575 | -1.697734 | -0.000077 |
| H | -3.101254 | -2.211403 | 0.893647  |
| H | -3.171850 | -0.021193 | -2.172812 |
| H | 1.075190  | 2.206559  | -0.000109 |
| H | 3.101250  | 2.211401  | -0.893652 |
| H | 3.101177  | 2.211527  | 0.893598  |
| H | 4.653210  | -0.382936 | 1.269743  |
| H | 3.171854  | 0.021197  | 2.172811  |
| H | 3.294322  | -1.533532 | 1.313389  |
| H | 3.294427  | -1.533716 | -1.312901 |
| H | -1.075190 | -2.206559 | 0.000107  |
| H | 3.172028  | 0.020892  | -2.172551 |
| H | 4.544575  | 1.697734  | 0.000068  |
| O | -1.517120 | 2.321728  | -0.000226 |
| O | 1.517120  | -2.321729 | 0.000222  |
| H | -0.892260 | 3.067297  | -0.000261 |
| H | 0.892260  | -3.067298 | 0.000247  |

B3LYP/def2TZVP

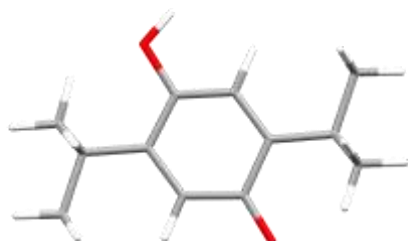

| <i>Element</i> | <i>X</i>  | <i>Y</i>  | <i>Z</i>  |
|----------------|-----------|-----------|-----------|
| C              | -3.446962 | -1.672377 | -0.000041 |

|   |           |           |           |
|---|-----------|-----------|-----------|
| C | 0.608016  | 1.223780  | -0.000067 |
| C | -0.605615 | -1.225237 | 0.000070  |
| C | -0.787095 | 1.154152  | -0.000121 |
| C | 0.835295  | -1.220222 | 0.000131  |
| C | -3.547719 | 0.466113  | 1.262939  |
| C | -3.547613 | 0.465960  | -1.263287 |
| C | 3.457270  | 1.687004  | 0.000026  |
| C | 3.536784  | -0.467066 | -1.258132 |
| C | -1.433798 | -0.097400 | -0.000052 |
| C | 1.443731  | 0.103483  | 0.000054  |
| C | -2.969205 | -0.210781 | -0.000109 |
| C | 2.970707  | 0.229908  | 0.000108  |
| C | 3.536682  | -0.466891 | 1.258491  |
| H | -3.165464 | -0.032718 | 2.166699  |
| H | -3.264106 | 1.524954  | 1.309881  |
| H | -3.263995 | 1.524795  | -1.310333 |
| H | -4.649582 | 0.394957  | 1.269465  |
| H | 4.641508  | -0.451707 | -1.249673 |
| H | -3.093140 | -2.214455 | -0.889149 |
| H | -4.649476 | 0.394805  | -1.269897 |
| H | -4.549238 | -1.696511 | -0.000086 |
| H | -3.093215 | -2.214348 | 0.889163  |
| H | -3.165283 | -0.032980 | -2.166956 |
| H | 1.051240  | 2.228689  | -0.000124 |
| H | 3.112283  | 2.233584  | -0.892551 |
| H | 3.112209  | 2.233709  | 0.892499  |
| H | 4.641406  | -0.451533 | 1.250120  |
| H | 3.190223  | 0.048234  | 2.168851  |
| H | 3.182324  | -1.507102 | 1.278937  |
| H | 3.182428  | -1.507280 | -1.278462 |
| H | -1.041353 | -2.225799 | 0.000130  |
| H | 3.190399  | 0.047931  | -2.168591 |
| H | 4.559634  | 1.706751  | 0.000070  |
| O | -1.541599 | 2.351391  | -0.000246 |
| O | 1.506028  | -2.314542 | 0.000244  |
| H | -0.883923 | 3.067121  | -0.000300 |

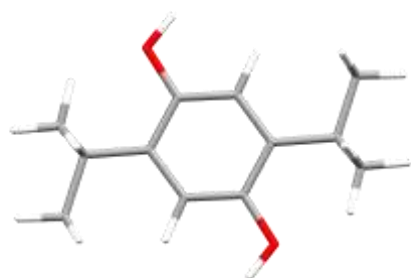

| <i>Element</i> | <i>X</i>  | <i>Y</i>  | <i>Z</i>  |
|----------------|-----------|-----------|-----------|
| C              | -3.441466 | -1.665142 | -0.000025 |
| C              | 0.614473  | 1.209423  | -0.000055 |
| C              | -0.614472 | -1.209424 | 0.000053  |
| C              | -0.774557 | 1.145110  | -0.000109 |
| C              | 0.774557  | -1.145111 | 0.000107  |
| C              | -3.548084 | 0.471489  | 1.264282  |
| C              | -3.547982 | 0.471305  | -1.264651 |
| C              | 3.441464  | 1.665142  | 0.000025  |
| C              | 3.548086  | -0.471486 | -1.264286 |
| C              | -1.441388 | -0.086988 | -0.000057 |
| C              | 1.441388  | 0.086987  | 0.000054  |
| C              | -2.972489 | -0.201380 | -0.000112 |
| C              | 2.972489  | 0.201380  | 0.000109  |
| C              | 3.547982  | -0.471307 | 1.264647  |
| H              | -3.164739 | -0.014670 | 2.164091  |
| H              | -3.291382 | 1.527037  | 1.309621  |
| H              | -3.291278 | 1.526847  | -1.310122 |
| H              | -4.637321 | 0.382694  | 1.269835  |
| H              | 4.637322  | -0.382689 | -1.269839 |
| H              | -3.100400 | -2.203683 | -0.886681 |
| H              | -4.637218 | 0.382509  | -1.270279 |
| H              | -4.532442 | -1.692423 | -0.000070 |
| H              | -3.100475 | -2.203554 | 0.886738  |
| H              | -3.164564 | -0.014985 | -2.164357 |
| H              | 1.060951  | 2.195362  | -0.000101 |
| H              | 3.100472  | 2.203556  | -0.886736 |
| H              | 3.100398  | 2.203681  | 0.886682  |
| H              | 4.637218  | -0.382509 | 1.270276  |
| H              | 3.164563  | 0.014981  | 2.164354  |
| H              | 3.291279  | -1.526849 | 1.310117  |
| H              | 3.291386  | -1.527035 | -1.309627 |
| H              | -1.060951 | -2.195364 | 0.000099  |
| H              | 3.164739  | 0.014674  | -2.164094 |
| H              | 4.532440  | 1.692424  | 0.000069  |
| O              | -1.511777 | 2.309966  | -0.000214 |
| O              | 1.511777  | -2.309967 | 0.000213  |
| H              | -0.910329 | 3.061890  | -0.000239 |
| H              | 0.910329  | -3.061891 | 0.000237  |

B3LYP/def2TZVP (CPCM – DME)

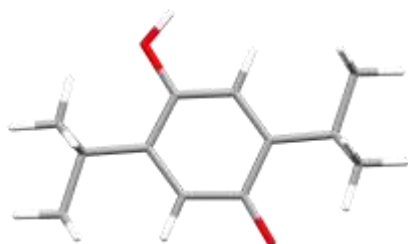

| <i>Element</i> | <i>X</i>  | <i>Y</i>  | <i>Z</i>  |
|----------------|-----------|-----------|-----------|
| C              | -3.450398 | -1.665586 | -0.000038 |
| C              | 0.612190  | 1.204066  | -0.000054 |
| C              | -0.610315 | -1.219864 | 0.000050  |
| C              | -0.778000 | 1.145846  | -0.000107 |
| C              | 0.818366  | -1.219340 | 0.000110  |
| C              | -3.546486 | 0.468396  | 1.262395  |
| C              | -3.546383 | 0.468235  | -1.262751 |
| C              | 3.445086  | 1.677847  | 0.000013  |
| C              | 3.547148  | -0.461455 | -1.259858 |
| C              | -1.433363 | -0.093087 | -0.000056 |
| C              | 1.440132  | 0.082791  | 0.000051  |
| C              | -2.968157 | -0.205818 | -0.000111 |
| C              | 2.968437  | 0.216869  | 0.000106  |
| C              | 3.547038  | -0.461256 | 1.260229  |
| H              | -3.172178 | -0.027139 | 2.161586  |
| H              | -3.273474 | 1.520191  | 1.313089  |
| H              | -3.273362 | 1.520022  | -1.313560 |
| H              | -4.637914 | 0.393615  | 1.265624  |
| H              | 4.641143  | -0.420891 | -1.250446 |
| H              | -3.108181 | -2.206684 | -0.883949 |
| H              | -4.637811 | 0.393458  | -1.266057 |
| H              | -4.542856 | -1.684009 | -0.000080 |
| H              | -3.108252 | -2.206572 | 0.883970  |
| H              | -3.172006 | -0.027419 | -2.161847 |
| H              | 1.054402  | 2.194836  | -0.000098 |
| H              | 3.102491  | 2.219237  | -0.885047 |
| H              | 3.102418  | 2.219375  | 0.884959  |
| H              | 4.641034  | -0.420707 | 1.250900  |
| H              | 3.198476  | 0.051236  | 2.161157  |
| H              | 3.228847  | -1.500810 | 1.304541  |
| H              | 3.228973  | -1.501020 | -1.304027 |
| H              | -1.054036 | -2.206182 | 0.000095  |
| H              | 3.198654  | 0.050887  | -2.160899 |
| H              | 4.537695  | 1.703123  | 0.000056  |
| O              | -1.518296 | 2.335349  | -0.000210 |
| O              | 1.475174  | -2.330258 | 0.000213  |

H    -0.896448    3.071092    -0.000246

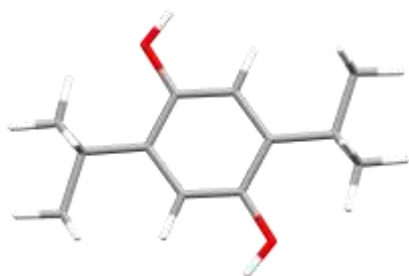

| Element | X         | Y         | Z         |
|---------|-----------|-----------|-----------|
| C       | -3.441532 | -1.665331 | -0.000026 |
| C       | 0.616625  | 1.210305  | -0.000058 |
| C       | -0.616625 | -1.210305 | 0.000056  |
| C       | -0.773431 | 1.147827  | -0.000110 |
| C       | 0.773431  | -1.147827 | 0.000108  |
| C       | -3.549897 | 0.470552  | 1.264267  |
| C       | -3.549789 | 0.470373  | -1.264631 |
| C       | 3.441532  | 1.665331  | 0.000025  |
| C       | 3.549897  | -0.470551 | -1.264269 |
| C       | -1.441268 | -0.085194 | -0.000054 |
| C       | 1.441268  | 0.085194  | 0.000052  |
| C       | -2.972865 | -0.201302 | -0.000110 |
| C       | 2.972865  | 0.201302  | 0.000108  |
| C       | 3.549790  | -0.470374 | 1.264628  |
| H       | -3.169644 | -0.019135 | 2.163666  |
| H       | -3.291169 | 1.525728  | 1.312520  |
| H       | -3.291050 | 1.525541  | -1.313015 |
| H       | -4.639187 | 0.383122  | 1.267165  |
| H       | 4.639187  | -0.383122 | -1.267168 |
| H       | -3.099220 | -2.203848 | -0.885948 |
| H       | -4.639080 | 0.382951  | -1.267606 |
| H       | -4.532617 | -1.691343 | -0.000072 |
| H       | -3.099296 | -2.203722 | 0.886002  |
| H       | -3.169466 | -0.019446 | -2.163929 |
| H       | 1.062683  | 2.195734  | -0.000107 |
| H       | 3.099296  | 2.203723  | -0.886003 |
| H       | 3.099220  | 2.203847  | 0.885947  |
| H       | 4.639080  | -0.382951 | 1.267603  |
| H       | 3.169466  | 0.019445  | 2.163926  |
| H       | 3.291051  | -1.525542 | 1.313012  |
| H       | 3.291169  | -1.525728 | -1.312523 |
| H       | -1.062683 | -2.195734 | 0.000105  |
| H       | 3.169644  | 0.019136  | -2.163669 |
| H       | 4.532617  | 1.691343  | 0.000070  |

|   |           |           |           |
|---|-----------|-----------|-----------|
| O | -1.507586 | 2.313862  | -0.000219 |
| O | 1.507586  | -2.313862 | 0.000216  |
| H | -0.906950 | 3.068193  | -0.000242 |
| H | 0.906950  | -3.068193 | 0.000239  |

## DPQ

### Cation-Free

*Oxidised*

PBE/def2TZVP

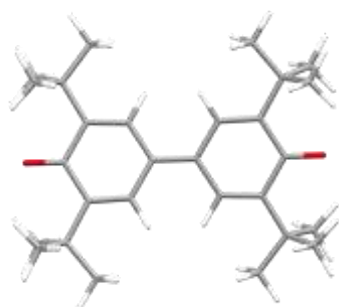

| <i>Element</i> | <i>X</i>  | <i>Y</i>  | <i>Z</i>  |
|----------------|-----------|-----------|-----------|
| C              | 1.418158  | -4.082099 | 2.264601  |
| C              | 1.901102  | -2.852272 | 3.051613  |
| C              | 1.252431  | -2.906793 | 4.455521  |
| C              | 3.440039  | -2.948550 | 3.179547  |
| C              | 1.519396  | -1.543204 | 2.356382  |
| C              | 0.831566  | -1.527393 | 1.178719  |
| C              | 0.467919  | -0.321799 | 0.482404  |
| C              | -0.241169 | -0.359255 | -0.743409 |
| C              | -0.743391 | -1.594169 | -1.284991 |
| C              | -1.437029 | -1.680458 | -2.456175 |
| C              | -1.968857 | -3.015184 | -2.983782 |
| C              | -1.622016 | -4.182698 | -2.044787 |
| C              | -3.509714 | -2.952679 | -3.109548 |
| C              | -1.340546 | -3.318786 | -4.364997 |
| C              | -1.683299 | -0.435429 | -3.236408 |
| O              | -2.305224 | -0.468277 | -4.311503 |
| C              | -1.163220 | 0.850077  | -2.691886 |
| C              | -1.390258 | 2.144718  | -3.476146 |
| C              | -0.780760 | 3.362741  | -2.761982 |
| C              | -0.728844 | 2.035745  | -4.870642 |
| C              | -2.908243 | 2.401346  | -3.632889 |
| C              | -0.492442 | 0.835858  | -1.504407 |
| C              | 0.857768  | 0.923596  | 1.088670  |
| C              | 1.534337  | 1.011478  | 2.269679  |

|   |           |           |           |
|---|-----------|-----------|-----------|
| C | 1.911496  | 2.360631  | 2.886315  |
| C | 1.438148  | 3.539944  | 2.020140  |
| C | 3.449816  | 2.462140  | 3.020375  |
| C | 1.251976  | 2.503368  | 4.278660  |
| C | 1.910027  | -0.245623 | 2.975416  |
| O | 2.531930  | -0.212772 | 4.050523  |
| H | 1.866241  | -4.134738 | 1.260422  |
| H | 0.322391  | -4.104659 | 2.160725  |
| H | 1.715457  | -4.992089 | 2.804913  |
| H | 1.606880  | -2.087374 | 5.090033  |
| H | 0.156108  | -2.847814 | 4.380139  |
| H | 1.507491  | -3.861948 | 4.939328  |
| H | 3.841203  | -2.129675 | 3.786373  |
| H | 3.708688  | -3.903454 | 3.656407  |
| H | 3.915389  | -2.920206 | 2.187421  |
| H | 0.563737  | -2.478033 | 0.726090  |
| H | -0.581215 | -2.504350 | -0.714386 |
| H | -0.535062 | -4.315391 | -1.931082 |
| H | -2.065977 | -4.057654 | -1.045194 |
| H | -2.023869 | -5.114100 | -2.468353 |
| H | -3.820338 | -2.176742 | -3.817475 |
| H | -3.887717 | -3.923590 | -3.464309 |
| H | -3.971717 | -2.746258 | -2.132296 |
| H | -1.604892 | -2.551068 | -5.100128 |
| H | -1.705123 | -4.292352 | -4.726519 |
| H | -0.244051 | -3.374768 | -4.289826 |
| H | -1.228042 | 3.529240  | -1.769902 |
| H | 0.309944  | 3.271838  | -2.643553 |
| H | -0.971833 | 4.262821  | -3.363439 |
| H | -1.166602 | 1.220282  | -5.456400 |
| H | 0.353662  | 1.862087  | -4.775245 |
| H | -0.873269 | 2.979060  | -5.419011 |
| H | -3.065291 | 3.347359  | -4.173113 |
| H | -3.391628 | 2.489724  | -2.648200 |
| H | -3.392872 | 1.594071  | -4.192468 |
| H | -0.103147 | 1.775167  | -1.121695 |
| H | 0.574139  | 1.845106  | 0.587975  |
| H | 1.733783  | 4.481254  | 2.504846  |
| H | 1.894260  | 3.528712  | 1.018221  |
| H | 0.343333  | 3.558426  | 1.906290  |
| H | 3.844308  | 1.682285  | 3.680594  |
| H | 3.716383  | 3.444850  | 3.438310  |
| H | 3.933047  | 2.370769  | 2.035884  |
| H | 1.505755  | 3.485866  | 4.704927  |
| H | 0.156140  | 2.442256  | 4.198130  |
| H | 1.599161  | 1.724021  | 4.965542  |

B3LYP/def2TZVP

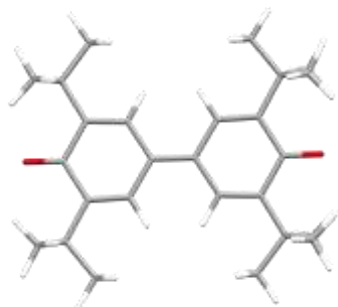

| <i>Element</i> | <i>X</i>  | <i>Y</i>  | <i>Z</i>  |
|----------------|-----------|-----------|-----------|
| C              | 1.274005  | -4.076577 | 2.344637  |
| C              | 1.798477  | -2.845625 | 3.101632  |
| C              | 1.143388  | -2.843486 | 4.501220  |
| C              | 3.330269  | -2.997594 | 3.237003  |
| C              | 1.467013  | -1.541756 | 2.369861  |
| C              | 0.791311  | -1.525081 | 1.199593  |
| C              | 0.463631  | -0.322026 | 0.474967  |
| C              | -0.236890 | -0.359027 | -0.735967 |
| C              | -0.703315 | -1.599056 | -1.305680 |
| C              | -1.384938 | -1.686638 | -2.469338 |
| C              | -1.866542 | -3.026504 | -3.033473 |
| C              | -1.478825 | -4.203579 | -2.123788 |
| C              | -3.406629 | -3.020597 | -3.159583 |
| C              | -1.225414 | -3.274484 | -4.417472 |
| C              | -1.675761 | -0.435026 | -3.223229 |
| O              | -2.290160 | -0.467478 | -4.285295 |
| C              | -1.200893 | 0.857029  | -2.653530 |
| C              | -1.484801 | 2.156461  | -3.412676 |
| C              | -0.921337 | 3.383776  | -2.678127 |
| C              | -0.825599 | 2.104028  | -4.809282 |
| C              | -3.010126 | 2.357738  | -3.557119 |
| C              | -0.530561 | 0.840855  | -1.480170 |
| C              | 0.896047  | 0.921175  | 1.064257  |
| C              | 1.572300  | 1.009259  | 2.231006  |
| C              | 2.006349  | 2.353561  | 2.822516  |
| C              | 1.579639  | 3.534274  | 1.935278  |
| C              | 3.545636  | 2.398125  | 2.951370  |
| C              | 1.355442  | 2.552057  | 4.209861  |
| C              | 1.902502  | -0.246027 | 2.962229  |
| O              | 2.516903  | -0.213575 | 4.024294  |
| H              | 1.719983  | -4.169159 | 1.351824  |
| H              | 0.187039  | -4.060874 | 2.237800  |
| H              | 1.533577  | -4.976554 | 2.903775  |
| H              | 1.521090  | -2.031729 | 5.116539  |

|   |           |           |           |
|---|-----------|-----------|-----------|
| H | 0.058515  | -2.744939 | 4.418056  |
| H | 1.356795  | -3.788805 | 5.005321  |
| H | 3.760526  | -2.189663 | 3.822129  |
| H | 3.560789  | -3.944167 | 3.731106  |
| H | 3.804216  | -3.008642 | 2.252712  |
| H | 0.484459  | -2.464033 | 0.774950  |
| H | -0.501272 | -2.505637 | -0.764015 |
| H | -0.396286 | -4.297223 | -2.012008 |
| H | -1.925288 | -4.119536 | -1.130433 |
| H | -1.842221 | -5.131735 | -2.567005 |
| H | -3.747207 | -2.249441 | -3.844835 |
| H | -3.745947 | -3.989766 | -3.532213 |
| H | -3.871750 | -2.854116 | -2.185147 |
| H | -1.513557 | -2.509284 | -5.132783 |
| H | -1.547660 | -4.245604 | -4.800055 |
| H | -0.135782 | -3.289222 | -4.339621 |
| H | -1.367022 | 3.511058  | -1.689027 |
| H | 0.164132  | 3.333486  | -2.566885 |
| H | -1.148571 | 4.280736  | -3.255881 |
| H | -1.228904 | 1.293581  | -5.409922 |
| H | 0.254969  | 1.970053  | -4.719841 |
| H | -1.004780 | 3.045811  | -5.332941 |
| H | -3.206498 | 3.301467  | -4.071028 |
| H | -3.486654 | 2.404859  | -2.575142 |
| H | -3.465785 | 1.553252  | -4.127561 |
| H | -0.186116 | 1.776301  | -1.077167 |
| H | 0.656413  | 1.831263  | 0.544231  |
| H | 1.910694  | 4.465447  | 2.397112  |
| H | 2.029751  | 3.484934  | 0.941235  |
| H | 0.494655  | 3.593103  | 1.823493  |
| H | 3.911738  | 1.625652  | 3.621804  |
| H | 3.850844  | 3.370835  | 3.343761  |
| H | 4.017403  | 2.267197  | 1.974707  |
| H | 1.643422  | 3.526015  | 4.612045  |
| H | 0.266047  | 2.530600  | 4.130276  |
| H | 1.669069  | 1.783415  | 4.910628  |

B3LYP/def2TZVP (CPCM – DME)

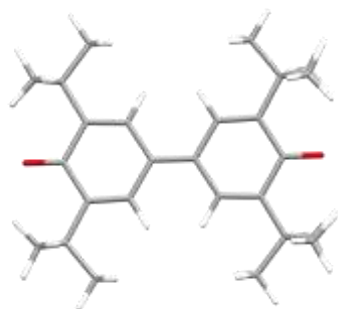

| <i>Element</i> | <i>X</i>  | <i>Y</i>  | <i>Z</i>  |
|----------------|-----------|-----------|-----------|
| C              | 1.300552  | -4.079086 | 2.318692  |
| C              | 1.817397  | -2.850158 | 3.084734  |
| C              | 1.162619  | -2.866026 | 4.484241  |
| C              | 3.350174  | -2.994844 | 3.215495  |
| C              | 1.476102  | -1.542161 | 2.363473  |
| C              | 0.798374  | -1.526101 | 1.193973  |
| C              | 0.463689  | -0.322023 | 0.475070  |
| C              | -0.236950 | -0.359030 | -0.736070 |
| C              | -0.710409 | -1.598557 | -1.300028 |
| C              | -1.393969 | -1.685208 | -2.463015 |
| C              | -1.885732 | -3.026710 | -3.016274 |
| C              | -1.505301 | -4.199790 | -2.097922 |
| C              | -3.425943 | -3.012934 | -3.138738 |
| C              | -1.246940 | -3.292393 | -4.397927 |
| C              | -1.674491 | -0.434958 | -3.221037 |
| O              | -2.290432 | -0.467491 | -4.285766 |
| C              | -1.190871 | 0.855652  | -2.658143 |
| C              | -1.460333 | 2.156947  | -3.420753 |
| C              | -0.885620 | 3.380477  | -2.688024 |
| C              | -0.797703 | 2.096817  | -4.815293 |
| C              | -2.982929 | 2.375948  | -3.566862 |
| C              | -0.522111 | 0.840427  | -1.483480 |
| C              | 0.887626  | 0.922123  | 1.067535  |
| C              | 1.562220  | 1.009612  | 2.235684  |
| C              | 1.982151  | 2.357815  | 2.830293  |
| C              | 1.543848  | 3.536295  | 1.945256  |
| C              | 3.520736  | 2.420366  | 2.958547  |
| C              | 1.326957  | 2.548851  | 4.216533  |
| C              | 1.901233  | -0.246094 | 2.960036  |
| O              | 2.517176  | -0.213561 | 4.024764  |
| H              | 1.745536  | -4.159642 | 1.324714  |
| H              | 0.213776  | -4.068807 | 2.212347  |
| H              | 1.567773  | -4.980508 | 2.872038  |
| H              | 1.530454  | -2.054878 | 5.106641  |
| H              | 0.076993  | -2.777886 | 4.400450  |
| H              | 1.385986  | -3.813264 | 4.980273  |
| H              | 3.779262  | -2.186866 | 3.801831  |
| H              | 3.586415  | -3.942420 | 3.704850  |
| H              | 3.820131  | -2.999001 | 2.229336  |
| H              | 0.498991  | -2.465087 | 0.764785  |
| H              | -0.515760 | -2.503756 | -0.753901 |
| H              | -0.423566 | -4.298820 | -1.985946 |
| H              | -1.949415 | -4.103860 | -1.104920 |
| H              | -1.876416 | -5.127779 | -2.535267 |
| H              | -3.765362 | -2.242018 | -3.825191 |

|   |           |           |           |
|---|-----------|-----------|-----------|
| H | -3.771023 | -3.981849 | -3.506570 |
| H | -3.886310 | -2.839872 | -2.163289 |
| H | -1.525400 | -2.529802 | -5.120118 |
| H | -1.579238 | -4.263269 | -4.772333 |
| H | -0.157728 | -3.317393 | -4.318138 |
| H | -1.330876 | 3.513125  | -1.699769 |
| H | 0.198686  | 3.318362  | -2.574377 |
| H | -1.103911 | 4.277334  | -3.269537 |
| H | -1.202632 | 1.286584  | -5.415535 |
| H | 0.281546  | 1.956445  | -4.720930 |
| H | -0.969847 | 3.038413  | -5.341547 |
| H | -3.167197 | 3.319538  | -4.085402 |
| H | -3.457838 | 2.433394  | -2.584755 |
| H | -3.449448 | 1.574007  | -4.132456 |
| H | -0.170078 | 1.774502  | -1.084599 |
| H | 0.640327  | 1.832234  | 0.551716  |
| H | 1.866033  | 4.468848  | 2.410767  |
| H | 1.994142  | 3.492399  | 0.951372  |
| H | 0.458669  | 3.583036  | 1.832586  |
| H | 3.897882  | 1.648567  | 3.623929  |
| H | 3.813936  | 3.394889  | 3.355461  |
| H | 3.992058  | 2.299781  | 1.980442  |
| H | 1.607941  | 3.523746  | 4.621264  |
| H | 0.238115  | 2.520318  | 4.132881  |
| H | 1.642220  | 1.780187  | 4.916890  |

*Singly Reduced*

PBE/def2TZVP

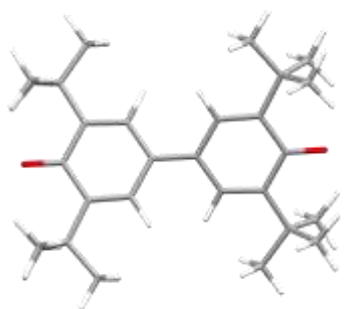

| <i>Element</i> | <i>X</i> | <i>Y</i>  | <i>Z</i> |
|----------------|----------|-----------|----------|
| C              | 1.722975 | -4.060290 | 2.124366 |
| C              | 2.111378 | -2.828409 | 2.959044 |
| C              | 1.479897 | -2.995547 | 4.360499 |
| C              | 3.652118 | -2.814972 | 3.084940 |
| C              | 1.628204 | -1.514581 | 2.326672 |
| C              | 0.930836 | -1.506555 | 1.136273 |

|   |           |           |           |
|---|-----------|-----------|-----------|
| C | 0.476301  | -0.321356 | 0.496903  |
| C | -0.249560 | -0.359697 | -0.757903 |
| C | -0.839385 | -1.557090 | -1.246212 |
| C | -1.541703 | -1.636234 | -2.431085 |
| C | -2.174438 | -2.956297 | -2.896465 |
| C | -1.921445 | -4.109174 | -1.910592 |
| C | -3.704699 | -2.785184 | -3.034056 |
| C | -1.575867 | -3.368657 | -4.261181 |
| C | -1.698659 | -0.436240 | -3.262982 |
| O | -2.334241 | -0.469812 | -4.361720 |
| C | -1.088093 | 0.804297  | -2.768052 |
| C | -1.210496 | 2.084473  | -3.608090 |
| C | -0.513215 | 3.287543  | -2.951205 |
| C | -0.561700 | 1.866803  | -4.994306 |
| C | -2.702228 | 2.449657  | -3.787400 |
| C | -0.409986 | 0.798068  | -1.566566 |
| C | 0.772019  | 0.903470  | 1.154505  |
| C | 1.455075  | 0.984411  | 2.350465  |
| C | 1.727038  | 2.338126  | 3.023510  |
| C | 1.165165  | 3.519813  | 2.215432  |
| C | 3.251676  | 2.552440  | 3.166071  |
| C | 1.067770  | 2.371248  | 4.421430  |
| C | 1.925401  | -0.244814 | 3.001982  |
| O | 2.560981  | -0.211243 | 4.100721  |
| H | 2.167370  | -4.033745 | 1.117543  |
| H | 0.631790  | -4.157847 | 2.015453  |
| H | 2.090783  | -4.968024 | 2.627821  |
| H | 1.755757  | -2.153316 | 5.005942  |
| H | 0.382304  | -3.038540 | 4.283530  |
| H | 1.827761  | -3.934674 | 4.822790  |
| H | 3.977433  | -1.968228 | 3.700833  |
| H | 4.002596  | -3.753219 | 3.546988  |
| H | 4.117077  | -2.729333 | 2.090478  |
| H | 0.743247  | -2.453906 | 0.632969  |
| H | -0.756213 | -2.448603 | -0.626320 |
| H | -0.847467 | -4.314650 | -1.782473 |
| H | -2.352800 | -3.906157 | -0.918322 |
| H | -2.392848 | -5.025760 | -2.298382 |
| H | -3.936865 | -1.991476 | -3.753957 |
| H | -4.162024 | -3.728587 | -3.376803 |
| H | -4.149913 | -2.523157 | -2.061636 |
| H | -1.759616 | -2.588692 | -5.009471 |
| H | -2.030696 | -4.313252 | -4.604041 |
| H | -0.489598 | -3.525095 | -4.171571 |
| H | -0.943482 | 3.527017  | -1.966529 |
| H | 0.566921  | 3.118795  | -2.821917 |

|   |           |          |           |
|---|-----------|----------|-----------|
| H | -0.638215 | 4.172629 | -3.594423 |
| H | -1.048476 | 1.035119 | -5.517259 |
| H | 0.509717  | 1.637855 | -4.884198 |
| H | -0.655415 | 2.781099 | -5.604149 |
| H | -2.797317 | 3.365206 | -4.395193 |
| H | -3.170689 | 2.638729 | -2.808993 |
| H | -3.238120 | 1.631681 | -4.283165 |
| H | 0.061905  | 1.718900 | -1.226910 |
| H | 0.404544  | 1.821503 | 0.698263  |
| H | 1.393759  | 4.459049 | 2.742984  |
| H | 1.612633  | 3.583369 | 1.211540  |
| H | 0.071994  | 3.459000 | 2.100705  |
| H | 3.695459  | 1.748221 | 3.764684  |
| H | 3.453730  | 3.520614 | 3.654432  |
| H | 3.731457  | 2.562801 | 2.175018  |
| H | 1.268333  | 3.338601 | 4.911973  |
| H | -0.023388 | 2.252533 | 4.333370  |
| H | 1.461401  | 1.562479 | 5.048388  |

B3LYP/def2TZVP

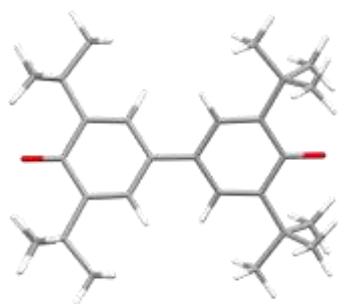

| <i>Element</i> | <i>X</i>  | <i>Y</i>  | <i>Z</i>  |
|----------------|-----------|-----------|-----------|
| C              | 1.712578  | -4.058210 | 2.122428  |
| C              | 2.101745  | -2.824858 | 2.953965  |
| C              | 1.469886  | -2.993036 | 4.353376  |
| C              | 3.641072  | -2.817507 | 3.078513  |
| C              | 1.619688  | -1.512589 | 2.317518  |
| C              | 0.926991  | -1.502945 | 1.134905  |
| C              | 0.474595  | -0.321447 | 0.493951  |
| C              | -0.247851 | -0.359607 | -0.754953 |
| C              | -0.835146 | -1.553793 | -1.245285 |
| C              | -1.532950 | -1.634078 | -2.422195 |
| C              | -2.164430 | -2.953241 | -2.891804 |
| C              | -1.910865 | -4.108050 | -1.908857 |
| C              | -3.693965 | -2.788117 | -3.027279 |
| C              | -1.565589 | -3.366414 | -4.254360 |
| C              | -1.690767 | -0.435823 | -3.249351 |

|   |           |           |           |
|---|-----------|-----------|-----------|
| O | -2.320371 | -0.469077 | -4.337746 |
| C | -1.084698 | 0.802783  | -2.755950 |
| C | -1.211368 | 2.081902  | -3.596963 |
| C | -0.516953 | 3.286782  | -2.941129 |
| C | -0.561268 | 1.870327  | -4.981773 |
| C | -2.701387 | 2.448003  | -3.774993 |
| C | -0.411207 | 0.794930  | -1.562282 |
| C | 0.772850  | 0.899700  | 1.150658  |
| C | 1.451447  | 0.981777  | 2.338625  |
| C | 1.727537  | 2.334091  | 3.012801  |
| C | 1.168729  | 3.517371  | 2.205555  |
| C | 3.250565  | 2.549341  | 3.153975  |
| C | 1.067641  | 2.373192  | 4.408546  |
| C | 1.917515  | -0.245231 | 2.988347  |
| O | 2.547112  | -0.211976 | 4.076745  |
| H | 2.153700  | -4.033785 | 1.123509  |
| H | 0.629768  | -4.154026 | 2.015322  |
| H | 2.076520  | -4.959045 | 2.622782  |
| H | 1.744561  | -2.164158 | 5.000799  |
| H | 0.380210  | -3.030690 | 4.275382  |
| H | 1.809442  | -3.928750 | 4.809241  |
| H | 3.972930  | -1.983765 | 3.692107  |
| H | 3.986332  | -3.752333 | 3.531867  |
| H | 4.101019  | -2.730631 | 2.090694  |
| H | 0.738165  | -2.440633 | 0.637282  |
| H | -0.749698 | -2.436637 | -0.632236 |
| H | -0.845024 | -4.311092 | -1.782810 |
| H | -2.339261 | -3.908485 | -0.924136 |
| H | -2.377627 | -5.017882 | -2.294410 |
| H | -3.934085 | -2.006197 | -3.743306 |
| H | -4.145657 | -3.727642 | -3.361794 |
| H | -4.134105 | -2.526276 | -2.061567 |
| H | -1.749682 | -2.599992 | -5.002925 |
| H | -2.011734 | -4.307772 | -4.591216 |
| H | -0.486578 | -3.516569 | -4.164464 |
| H | -0.944886 | 3.523515  | -1.964420 |
| H | 0.555075  | 3.121213  | -2.813201 |
| H | -0.642157 | 4.165348  | -3.578905 |
| H | -1.041038 | 1.050382  | -5.510227 |
| H | 0.501802  | 1.641389  | -4.870623 |
| H | -0.650562 | 2.781277  | -5.582465 |
| H | -2.795523 | 3.360826  | -4.372125 |
| H | -3.165807 | 2.630619  | -2.802440 |
| H | -3.237706 | 1.643531  | -4.271811 |
| H | 0.053849  | 1.706852  | -1.223661 |
| H | 0.411168  | 1.808311  | 0.696613  |
| H | 1.396745  | 4.449473  | 2.728534  |
| H | 1.613634  | 3.579494  | 1.209899  |

|   |           |          |          |
|---|-----------|----------|----------|
| H | 0.083982  | 3.458948 | 2.091824 |
| H | 3.696299  | 1.758514 | 3.751936 |
| H | 3.451287  | 3.513592 | 3.632099 |
| H | 3.725652  | 2.554533 | 2.169515 |
| H | 1.263365  | 3.336593 | 4.890401 |
| H | -0.015229 | 2.253413 | 4.319504 |
| H | 1.455670  | 1.577475 | 5.039436 |

B3LYP/def2TZVP (CPCM – DME)

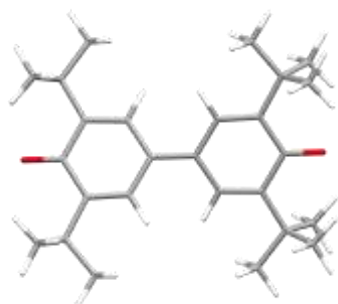

| <i>Element</i> | <i>X</i>  | <i>Y</i>  | <i>Z</i>  |
|----------------|-----------|-----------|-----------|
| C              | 1.657398  | -4.063555 | 2.135593  |
| C              | 2.063501  | -2.835065 | 2.966992  |
| C              | 1.420920  | -2.993532 | 4.362415  |
| C              | 3.602201  | -2.856694 | 3.095521  |
| C              | 1.604946  | -1.515372 | 2.326613  |
| C              | 0.912954  | -1.504427 | 1.142669  |
| C              | 0.474779  | -0.321437 | 0.494272  |
| C              | -0.248036 | -0.359617 | -0.755273 |
| C              | -0.821423 | -1.557814 | -1.252699 |
| C              | -1.518683 | -1.639627 | -2.430761 |
| C              | -2.127675 | -2.969254 | -2.903169 |
| C              | -1.856740 | -4.121196 | -1.920848 |
| C              | -3.659881 | -2.833265 | -3.038948 |
| C              | -1.517050 | -3.373563 | -4.262912 |
| C              | -1.689942 | -0.435778 | -3.247920 |
| O              | -2.320838 | -0.469101 | -4.338552 |
| C              | -1.099382 | 0.808311  | -2.748107 |
| C              | -1.239973 | 2.098344  | -3.571510 |
| C              | -0.554690 | 3.300793  | -2.900811 |
| C              | -0.589573 | 1.915778  | -4.960119 |
| C              | -2.733199 | 2.456037  | -3.737529 |
| C              | -0.424583 | 0.798969  | -1.554267 |
| C              | 0.786536  | 0.901164  | 1.142295  |
| C              | 1.466602  | 0.984582  | 2.330255  |
| C              | 1.757629  | 2.343867  | 2.985687  |
| C              | 1.207516  | 3.521850  | 2.164064  |

|   |           |           |           |
|---|-----------|-----------|-----------|
| C | 3.282811  | 2.548954  | 3.116026  |
| C | 1.100735  | 2.412074  | 4.381546  |
| C | 1.916682  | -0.245276 | 2.986921  |
| O | 2.547578  | -0.211951 | 4.077552  |
| H | 2.103300  | -4.049396 | 1.138733  |
| H | 0.573836  | -4.143791 | 2.024990  |
| H | 2.005292  | -4.967800 | 2.639452  |
| H | 1.700490  | -2.170115 | 5.014432  |
| H | 0.331393  | -3.019234 | 4.279044  |
| H | 1.745613  | -3.932278 | 4.820124  |
| H | 3.952917  | -2.031711 | 3.710202  |
| H | 3.927071  | -3.797352 | 3.549135  |
| H | 4.067734  | -2.780653 | 2.109503  |
| H | 0.711441  | -2.444473 | 0.655539  |
| H | -0.723707 | -2.445734 | -0.649673 |
| H | -0.788370 | -4.308522 | -1.793278 |
| H | -2.291068 | -3.931472 | -0.936915 |
| H | -2.307957 | -5.036642 | -2.309338 |
| H | -3.919730 | -2.057987 | -3.755086 |
| H | -4.091972 | -3.780869 | -3.372844 |
| H | -4.106811 | -2.581701 | -2.073699 |
| H | -1.706654 | -2.612552 | -5.015385 |
| H | -1.948779 | -4.319819 | -4.601108 |
| H | -0.436801 | -3.511241 | -4.169183 |
| H | -0.982153 | 3.521974  | -1.920437 |
| H | 0.519354  | 3.144857  | -2.778857 |
| H | -0.690336 | 4.185241  | -3.526843 |
| H | -1.059775 | 1.101941  | -5.506023 |
| H | 0.476209  | 1.696900  | -4.855550 |
| H | -0.688322 | 2.835345  | -5.543892 |
| H | -2.835818 | 3.374068  | -4.323067 |
| H | -3.194587 | 2.626404  | -2.761427 |
| H | -3.270296 | 1.656641  | -4.241310 |
| H | 0.025537  | 1.715826  | -1.210238 |
| H | 0.440214  | 1.812273  | 0.682370  |
| H | 1.446492  | 4.457094  | 2.674723  |
| H | 1.650170  | 3.568230  | 1.166725  |
| H | 0.121895  | 3.473904  | 2.055039  |
| H | 3.729940  | 1.763923  | 3.720264  |
| H | 3.492466  | 3.515925  | 3.582050  |
| H | 3.753477  | 2.541966  | 2.129566  |
| H | 1.306705  | 3.380771  | 4.845600  |
| H | 0.016350  | 2.303347  | 4.297747  |
| H | 1.480066  | 1.625651  | 5.028908  |

Doubly Reduced

PBE/def2TZVP

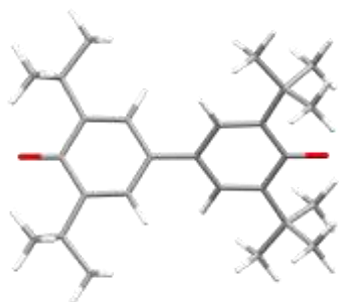

| Element | X         | Y         | Z         |
|---------|-----------|-----------|-----------|
| C       | 2.144733  | -3.989698 | 1.927898  |
| C       | 2.397077  | -2.769459 | 2.828367  |
| C       | 1.795146  | -3.079608 | 4.218477  |
| C       | 3.926932  | -2.594797 | 2.966928  |
| C       | 1.774700  | -1.474193 | 2.276822  |
| C       | 1.073547  | -1.471340 | 1.068808  |
| C       | 0.484242  | -0.320934 | 0.510628  |
| C       | -0.257501 | -0.360119 | -0.771628 |
| C       | -0.976726 | -1.497812 | -1.184729 |
| C       | -1.682348 | -1.573662 | -2.387753 |
| C       | -2.450717 | -2.849566 | -2.776271 |
| C       | -2.331125 | -3.967334 | -1.727559 |
| C       | -3.952077 | -2.522378 | -2.946652 |
| C       | -1.897544 | -3.398131 | -4.111935 |
| C       | -1.716973 | -0.437223 | -3.294628 |
| O       | -2.365805 | -0.471502 | -4.416273 |
| C       | -0.978748 | 0.740045  | -2.865469 |
| C       | -0.965741 | 1.976044  | -3.782752 |
| C       | -0.146549 | 3.143410  | -3.208570 |
| C       | -0.355638 | 1.601772  | -5.153101 |
| C       | -2.413267 | 2.477358  | -3.993168 |
| C       | -0.286649 | 0.738037  | -1.652244 |
| C       | 0.643310  | 0.869010  | 1.246165  |
| C       | 1.339877  | 0.945703  | 2.454400  |
| C       | 1.472863  | 2.280874  | 3.208656  |
| C       | 0.786418  | 3.451517  | 2.486235  |
| C       | 2.969147  | 2.638271  | 3.364617  |
| C       | 0.834272  | 2.153297  | 4.610829  |
| C       | 1.943714  | -0.243830 | 3.033628  |
| O       | 2.592549  | -0.209553 | 4.155271  |
| H       | 2.579546  | -3.856210 | 0.925085  |
| H       | 1.069387  | -4.192205 | 1.804871  |
| H       | 2.609086  | -4.881368 | 2.383575  |

|   |           |           |           |
|---|-----------|-----------|-----------|
| H | 1.957145  | -2.216951 | 4.879568  |
| H | 0.712748  | -3.265817 | 4.129090  |
| H | 2.266560  | -3.979147 | 4.657111  |
| H | 4.132128  | -1.723861 | 3.604705  |
| H | 4.385428  | -3.498144 | 3.411374  |
| H | 4.380137  | -2.429277 | 1.976236  |
| H | 0.987545  | -2.399137 | 0.498559  |
| H | -0.991802 | -2.350165 | -0.501608 |
| H | -1.284615 | -4.272678 | -1.572332 |
| H | -2.740936 | -3.660490 | -0.752667 |
| H | -2.896293 | -4.851194 | -2.070658 |
| H | -4.062325 | -1.721132 | -3.690454 |
| H | -4.512661 | -3.416994 | -3.277098 |
| H | -4.376637 | -2.183416 | -1.987947 |
| H | -1.965973 | -2.612850 | -4.877514 |
| H | -2.470493 | -4.286806 | -4.437184 |
| H | -0.842430 | -3.692442 | -3.992080 |
| H | -0.542276 | 3.483136  | -2.238776 |
| H | 0.910534  | 2.870763  | -3.064511 |
| H | -0.185193 | 3.995370  | -3.909292 |
| H | -0.923744 | 0.764688  | -5.581982 |
| H | 0.695631  | 1.295920  | -5.028405 |
| H | -0.385894 | 2.465174  | -5.844049 |
| H | -2.432697 | 3.334737  | -4.691970 |
| H | -2.843635 | 2.804674  | -3.033013 |
| H | -3.021523 | 1.656326  | -4.397386 |
| H | 0.290065  | 1.620061  | -1.364457 |
| H | 0.167673  | 1.767135  | 0.845506  |
| H | 0.925881  | 4.375087  | 3.074376  |
| H | 1.210973  | 3.619644  | 1.484236  |
| H | -0.295668 | 3.283834  | 2.370103  |
| H | 3.483836  | 1.811364  | 3.873321  |
| H | 3.090114  | 3.569105  | 3.950036  |
| H | 3.426793  | 2.791475  | 2.373991  |
| H | 0.966620  | 3.087858  | 5.187775  |
| H | -0.245642 | 1.954669  | 4.518125  |
| H | 1.307435  | 1.318199  | 5.145732  |

B3LYP/def2TZVP

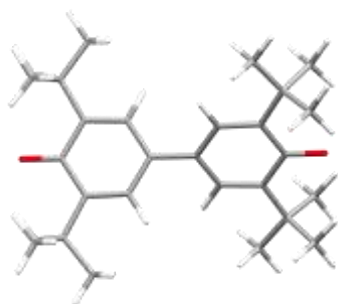

| <i>Element</i> | <i>X</i>  | <i>Y</i>  | <i>Z</i>  |
|----------------|-----------|-----------|-----------|
| C              | 2.251548  | -3.956922 | 1.852117  |
| C              | 2.467522  | -2.746247 | 2.774810  |
| C              | 1.876919  | -3.107336 | 4.155975  |
| C              | 3.991569  | -2.535780 | 2.913369  |
| C              | 1.805770  | -1.461443 | 2.245842  |
| C              | 1.106274  | -1.457064 | 1.043821  |
| C              | 0.484677  | -0.320912 | 0.511377  |
| C              | -0.257934 | -0.360143 | -0.772380 |
| C              | -1.007453 | -1.476906 | -1.161976 |
| C              | -1.711557 | -1.553692 | -2.358850 |
| C              | -2.517709 | -2.812003 | -2.726568 |
| C              | -2.433013 | -3.913445 | -1.657273 |
| C              | -4.009262 | -2.450181 | -2.901407 |
| C              | -1.981476 | -3.408373 | -4.047027 |
| C              | -1.708289 | -0.436765 | -3.279618 |
| O              | -2.352739 | -0.470809 | -4.393675 |
| C              | -0.938607 | 0.720652  | -2.875481 |
| C              | -0.888268 | 1.939035  | -3.814338 |
| C              | -0.033395 | 3.090111  | -3.259399 |
| C              | -0.286013 | 1.530235  | -5.176830 |
| C              | -2.315436 | 2.488340  | -4.034039 |
| C              | -0.251053 | 0.717386  | -1.666586 |
| C              | 0.605717  | 0.854474  | 1.262736  |
| C              | 1.297879  | 0.932374  | 2.466484  |
| C              | 1.391938  | 2.257108  | 3.244094  |
| C              | 0.668350  | 3.418143  | 2.542555  |
| C              | 2.873471  | 2.665267  | 3.403090  |
| C              | 0.757186  | 2.093624  | 4.642871  |
| C              | 1.935031  | -0.244290 | 3.018616  |
| O              | 2.579476  | -0.210246 | 4.132675  |
| H              | 2.678023  | -3.793026 | 0.859761  |
| H              | 1.191235  | -4.188650 | 1.727833  |
| H              | 2.739495  | -4.836271 | 2.286373  |
| H              | 2.013577  | -2.271972 | 4.840652  |
| H              | 0.807524  | -3.317821 | 4.062685  |
| H              | 2.366870  | -4.000777 | 4.565246  |

|   |           |           |           |
|---|-----------|-----------|-----------|
| H | 4.184769  | -1.686641 | 3.566760  |
| H | 4.470630  | -3.433019 | 3.327206  |
| H | 4.432763  | -2.335581 | 1.932607  |
| H | 1.044518  | -2.366536 | 0.460619  |
| H | -1.044461 | -2.306833 | -0.468486 |
| H | -1.404724 | -4.245736 | -1.497231 |
| H | -2.831181 | -3.578888 | -0.696521 |
| H | -3.020083 | -4.779806 | -1.980839 |
| H | -4.110165 | -1.673738 | -3.657870 |
| H | -4.589374 | -3.332606 | -3.202399 |
| H | -4.418046 | -2.079641 | -1.956831 |
| H | -2.027977 | -2.655819 | -4.832387 |
| H | -2.571947 | -4.285252 | -4.344045 |
| H | -0.941990 | -3.724651 | -3.920341 |
| H | -0.416564 | 3.456482  | -2.304223 |
| H | 1.006364  | 2.789446  | -3.111032 |
| H | -0.043732 | 3.924913  | -3.968572 |
| H | -0.870411 | 0.717590  | -5.605047 |
| H | 0.745982  | 1.192616  | -5.044059 |
| H | -0.280691 | 2.382295  | -5.869480 |
| H | -2.301358 | 3.334771  | -4.733431 |
| H | -2.732663 | 2.837489  | -3.085025 |
| H | -2.952639 | 1.699669  | -4.430600 |
| H | 0.346178  | 1.576910  | -1.391613 |
| H | 0.107250  | 1.734350  | 0.877475  |
| H | 0.777808  | 4.329055  | 3.141041  |
| H | 1.083546  | 3.615788  | 1.551618  |
| H | -0.399712 | 3.220351  | 2.425791  |
| H | 3.420511  | 1.866026  | 3.900333  |
| H | 2.959912  | 3.589162  | 3.990235  |
| H | 3.320609  | 2.842875  | 2.420677  |
| H | 0.852915  | 3.021232  | 5.222681  |
| H | -0.307215 | 1.860499  | 4.546287  |
| H | 1.249282  | 1.280692  | 5.174159  |

B3LYP/def2TZVP (CPCM – DME)

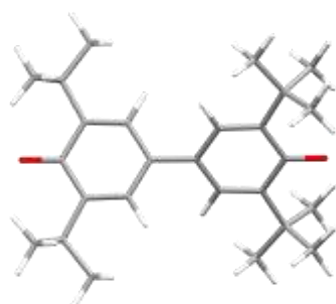

| <i>Element</i> | <i>X</i> | <i>Y</i> | <i>Z</i> |
|----------------|----------|----------|----------|
|----------------|----------|----------|----------|

|   |           |           |           |
|---|-----------|-----------|-----------|
| C | 2.138410  | -3.985647 | 1.885004  |
| C | 2.396275  | -2.775915 | 2.799222  |
| C | 1.794410  | -3.114556 | 4.180210  |
| C | 3.926640  | -2.620108 | 2.928219  |
| C | 1.775517  | -1.472573 | 2.262835  |
| C | 1.077455  | -1.465188 | 1.059616  |
| C | 0.484430  | -0.320924 | 0.510952  |
| C | -0.257688 | -0.360130 | -0.771952 |
| C | -0.979848 | -1.490150 | -1.176413 |
| C | -1.682875 | -1.570212 | -2.374089 |
| C | -2.450437 | -2.852351 | -2.746540 |
| C | -2.324078 | -3.958655 | -1.685473 |
| C | -3.954361 | -2.542486 | -2.905064 |
| C | -1.900478 | -3.427843 | -4.069567 |
| C | -1.706535 | -0.436672 | -3.276582 |
| O | -2.351771 | -0.470760 | -4.392008 |
| C | -0.966558 | 0.737212  | -2.858970 |
| C | -0.940201 | 1.980193  | -3.767846 |
| C | -0.113377 | 3.136854  | -3.181130 |
| C | -0.319009 | 1.623694  | -5.135311 |
| C | -2.375890 | 2.508892  | -3.975989 |
| C | -0.277686 | 0.730683  | -1.650460 |
| C | 0.633561  | 0.862548  | 1.245257  |
| C | 1.327399  | 0.943467  | 2.448222  |
| C | 1.447847  | 2.285967  | 3.193164  |
| C | 0.752528  | 3.445343  | 2.459598  |
| C | 2.935440  | 2.671399  | 3.343346  |
| C | 0.800213  | 2.176795  | 4.590155  |
| C | 1.933277  | -0.244381 | 3.015581  |
| O | 2.578513  | -0.210294 | 4.131008  |
| H | 2.570886  | -3.848341 | 0.891391  |
| H | 1.071633  | -4.187655 | 1.765168  |
| H | 2.597012  | -4.875036 | 2.325429  |
| H | 1.953543  | -2.289061 | 4.870307  |
| H | 0.719611  | -3.295870 | 4.090255  |
| H | 2.255255  | -4.019917 | 4.589470  |
| H | 4.163707  | -1.777885 | 3.574273  |
| H | 4.372819  | -3.529548 | 3.344623  |
| H | 4.373504  | -2.446260 | 1.945267  |
| H | 0.993981  | -2.383725 | 0.495047  |
| H | -0.996432 | -2.333808 | -0.500111 |
| H | -1.286049 | -4.262943 | -1.533535 |
| H | -2.731202 | -3.649470 | -0.720171 |
| H | -2.883166 | -4.838995 | -2.013687 |
| H | -4.099574 | -1.766988 | -3.653690 |
| H | -4.503195 | -3.440965 | -3.206836 |
| H | -4.371738 | -2.197005 | -1.955040 |
| H | -1.970455 | -2.683164 | -4.859223 |

|   |           |           |           |
|---|-----------|-----------|-----------|
| H | -2.463372 | -4.319748 | -4.364871 |
| H | -0.852358 | -3.716400 | -3.949820 |
| H | -0.507691 | 3.475149  | -2.220269 |
| H | 0.934121  | 2.861501  | -3.039412 |
| H | -0.142069 | 3.986142  | -3.869018 |
| H | -0.874532 | 0.811175  | -5.598056 |
| H | 0.721329  | 1.311124  | -5.008414 |
| H | -0.330391 | 2.492576  | -5.801991 |
| H | -2.374480 | 3.371134  | -4.651329 |
| H | -2.802706 | 2.830272  | -3.021682 |
| H | -3.005306 | 1.727263  | -4.395383 |
| H | 0.294105  | 1.603672  | -1.366975 |
| H | 0.161829  | 1.751754  | 0.850038  |
| H | 0.881707  | 4.365784  | 3.035276  |
| H | 1.175590  | 3.613344  | 1.466636  |
| H | -0.320321 | 3.274208  | 2.346189  |
| H | 3.475700  | 1.882852  | 3.862299  |
| H | 3.036080  | 3.606422  | 3.904730  |
| H | 3.388936  | 2.819889  | 2.359247  |
| H | 0.914249  | 3.115830  | 5.142203  |
| H | -0.269613 | 1.970036  | 4.496186  |
| H | 1.263881  | 1.371591  | 5.155473  |

## Lithium

*Oxidised*

PBE/def2TZVP

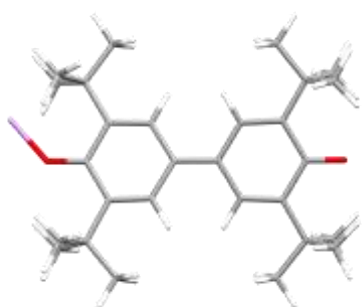

| <i>Element</i> | <i>X</i>  | <i>Y</i>  | <i>Z</i>  |
|----------------|-----------|-----------|-----------|
| C              | 2.623541  | 3.796514  | 0.373640  |
| C              | 3.580620  | 2.599773  | 0.246045  |
| C              | 4.458220  | 2.825438  | -1.011636 |
| C              | 4.472480  | 2.566342  | 1.512881  |
| C              | 2.825377  | 1.282576  | 0.113309  |
| C              | 1.463498  | 1.221801  | 0.114667  |
| C              | 0.723872  | -0.008383 | 0.017381  |
| C              | -0.700317 | -0.014294 | 0.037720  |
| C              | -1.452887 | 1.200090  | -0.057142 |

|   |           |           |           |
|---|-----------|-----------|-----------|
| C | -2.822174 | 1.224757  | -0.055870 |
| C | -3.603865 | 2.540965  | -0.186763 |
| C | -2.686343 | 3.769681  | -0.314531 |
| C | -4.469925 | 2.520805  | -1.481587 |
| C | -4.458866 | 2.780773  | 1.093763  |
| C | -3.556808 | -0.038751 | 0.069406  |
| C | -2.816066 | -1.292385 | 0.181686  |
| C | -3.556415 | -2.627564 | 0.331544  |
| C | -2.579749 | -3.811147 | 0.438093  |
| C | -4.413802 | -2.613232 | 1.618649  |
| C | -4.451703 | -2.873107 | -0.905931 |
| C | -1.445015 | -1.231177 | 0.151556  |
| C | 1.466447  | -1.234170 | -0.100700 |
| C | 2.828598  | -1.288176 | -0.133067 |
| C | 3.585365  | -2.601857 | -0.285103 |
| C | 2.630336  | -3.802035 | -0.393229 |
| C | 4.491955  | -2.825175 | 0.952580  |
| C | 4.448921  | -2.562217 | -1.571465 |
| C | 3.591735  | -0.001083 | -0.018383 |
| O | 4.824470  | 0.002441  | -0.032264 |
| H | 1.988240  | 3.727214  | 1.270240  |
| H | 1.978565  | 3.909114  | -0.511755 |
| H | 3.214861  | 4.717667  | 0.464406  |
| H | 5.219590  | 2.045933  | -1.117917 |
| H | 3.841390  | 2.847028  | -1.922375 |
| H | 4.964717  | 3.797552  | -0.924104 |
| H | 5.232505  | 1.780681  | 1.451221  |
| H | 4.981782  | 3.535245  | 1.617715  |
| H | 3.865626  | 2.404629  | 2.416147  |
| H | 0.907731  | 2.147867  | 0.233724  |
| H | -0.914821 | 2.137340  | -0.170208 |
| H | -2.042240 | 3.891273  | 0.567950  |
| H | -2.050923 | 3.713041  | -1.209701 |
| H | -3.298032 | 4.679165  | -0.402630 |
| H | -4.966971 | 1.557945  | -1.693571 |
| H | -5.204767 | 3.342796  | -1.482373 |
| H | -3.829407 | 2.674768  | -2.360347 |
| H | -4.947964 | 1.878858  | 1.501385  |
| H | -5.198192 | 3.583261  | 0.934809  |
| H | -3.811875 | 3.112491  | 1.916872  |
| H | -1.952951 | -3.916504 | -0.460573 |
| H | -1.924586 | -3.732843 | 1.319011  |
| H | -3.155630 | -4.740705 | 0.543124  |
| H | -5.179148 | -1.829843 | 1.589999  |
| H | -3.783564 | -2.457019 | 2.506564  |
| H | -4.919613 | -3.583025 | 1.732220  |

|    |           |           |           |
|----|-----------|-----------|-----------|
| H  | -4.953950 | -3.846287 | -0.806130 |
| H  | -3.849013 | -2.898769 | -1.825778 |
| H  | -5.220778 | -2.100319 | -1.012523 |
| H  | -0.893853 | -2.161129 | 0.254645  |
| H  | 0.911292  | -2.162066 | -0.205485 |
| H  | 3.223242  | -4.720515 | -0.499146 |
| H  | 2.005664  | -3.919490 | 0.505734  |
| H  | 1.974239  | -3.734211 | -1.274664 |
| H  | 5.252318  | -2.042662 | 1.043410  |
| H  | 5.000132  | -3.795051 | 0.851602  |
| H  | 3.895420  | -2.851760 | 1.876534  |
| H  | 4.958240  | -3.529541 | -1.689432 |
| H  | 3.821398  | -2.401178 | -2.460596 |
| H  | 5.208014  | -1.774545 | -1.525313 |
| O  | -4.834964 | -0.034683 | 0.079502  |
| Li | -6.002097 | 1.291686  | -0.046572 |

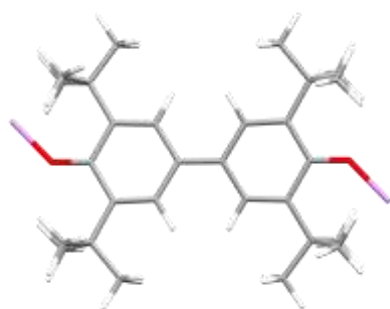

| Element | X         | Y         | Z         |
|---------|-----------|-----------|-----------|
| C       | -2.582502 | -3.819757 | 0.279337  |
| C       | -3.559847 | -2.635082 | 0.197500  |
| C       | -4.446916 | -2.845600 | -1.055269 |
| C       | -4.427893 | -2.653047 | 1.480241  |
| C       | -2.819771 | -1.301512 | 0.089654  |
| C       | -1.452509 | -1.232462 | 0.074998  |
| C       | -0.710316 | -0.005544 | -0.003796 |
| C       | 0.710322  | 0.007627  | -0.002788 |
| C       | 1.466264  | -1.217591 | -0.078180 |
| C       | 2.829808  | -1.246767 | -0.084652 |
| C       | 3.615752  | -2.560323 | -0.185778 |
| C       | 2.697318  | -3.791568 | -0.278980 |
| C       | 4.477752  | -2.569134 | -1.483037 |
| C       | 4.478007  | -2.764461 | 1.095729  |
| C       | 3.565118  | 0.034435  | 0.006390  |
| C       | 2.819641  | 1.303778  | 0.091163  |
| C       | 3.559564  | 2.637557  | 0.197469  |
| C       | 2.582104  | 3.822388  | 0.275586  |

|   |           |           |           |
|---|-----------|-----------|-----------|
| C | 4.425764  | 2.658029  | 1.481420  |
| C | 4.448434  | 2.845629  | -1.054432 |
| C | 1.452402  | 1.234698  | 0.074677  |
| C | -1.466148 | 1.219524  | -0.082664 |
| C | -2.829681 | 1.248684  | -0.091151 |
| C | -3.615477 | 2.562040  | -0.195966 |
| C | -2.696909 | 3.793103  | -0.290245 |
| C | -4.479570 | 2.768672  | 1.083903  |
| C | -4.475615 | 2.568323  | -1.494475 |
| C | -3.565123 | -0.032339 | 0.001331  |
| H | -1.936767 | -3.767175 | 1.169466  |
| H | -1.950694 | -3.901821 | -0.618617 |
| H | -3.158287 | -4.751557 | 0.354050  |
| H | -5.226980 | -2.081869 | -1.141715 |
| H | -3.841776 | -2.838152 | -1.973514 |
| H | -4.937844 | -3.826347 | -0.985679 |
| H | -5.204673 | -1.881120 | 1.463595  |
| H | -4.922643 | -3.630649 | 1.564996  |
| H | -3.808580 | -2.511932 | 2.377972  |
| H | -0.902590 | -2.164896 | 0.157781  |
| H | 0.928084  | -2.157527 | -0.161167 |
| H | 2.059537  | -3.895182 | 0.610601  |
| H | 2.059591  | -3.760252 | -1.174031 |
| H | 3.309463  | -4.701652 | -0.347623 |
| H | 5.001479  | -1.623874 | -1.708147 |
| H | 5.192569  | -3.406900 | -1.469611 |
| H | 3.836137  | -2.720204 | -2.361727 |
| H | 4.992305  | -1.860932 | 1.466510  |
| H | 5.199976  | -3.584012 | 0.952945  |
| H | 3.838001  | -3.056560 | 1.939294  |
| H | 1.951588  | 3.902698  | -0.623434 |
| H | 1.935089  | 3.771545  | 1.164887  |
| H | 3.157783  | 4.754333  | 0.349307  |
| H | 5.202564  | 1.886069  | 1.467401  |
| H | 3.805159  | 2.518669  | 2.378533  |
| H | 4.920395  | 3.635794  | 1.564975  |
| H | 4.939266  | 3.826509  | -0.986049 |
| H | 3.844614  | 2.836392  | -1.973529 |
| H | 5.228618  | 2.081728  | -1.138266 |
| H | 0.902365  | 2.167291  | 0.154849  |
| H | -0.927848 | 2.159297  | -0.166709 |
| H | -3.308954 | 4.703050  | -0.361545 |
| H | -2.060409 | 3.898454  | 0.600049  |
| H | -2.057894 | 3.760042  | -1.184314 |
| H | -4.994418 | 1.865872  | 1.455694  |
| H | -5.201319 | 3.587956  | 0.938493  |

|    |           |           |           |
|----|-----------|-----------|-----------|
| H  | -3.840772 | 3.062395  | 1.927820  |
| H  | -5.190477 | 3.406090  | -1.483691 |
| H  | -3.832744 | 2.717725  | -2.372533 |
| H  | -4.998986 | 1.622612  | -1.718515 |
| O  | 4.827879  | 0.034143  | 0.010458  |
| Li | 6.086487  | -1.263549 | -0.079840 |
| O  | -4.827889 | -0.032041 | 0.003579  |
| Li | -6.086356 | 1.265480  | -0.091078 |

B3LYP/def2TZVP

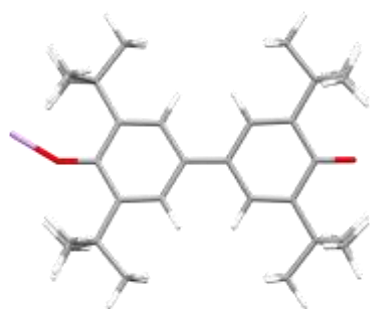

| <i>Element</i> | <i>X</i>  | <i>Y</i>  | <i>Z</i>  |
|----------------|-----------|-----------|-----------|
| C              | 2.616345  | 3.807929  | 0.272836  |
| C              | 3.570107  | 2.606239  | 0.178305  |
| C              | 4.445714  | 2.796770  | -1.083363 |
| C              | 4.458363  | 2.606916  | 1.445163  |
| C              | 2.809584  | 1.287248  | 0.081890  |
| C              | 1.460293  | 1.224657  | 0.085552  |
| C              | 0.716559  | -0.007769 | 0.015562  |
| C              | -0.693795 | -0.013700 | 0.034128  |
| C              | -1.450712 | 1.198286  | -0.033003 |
| C              | -2.811128 | 1.233602  | -0.027918 |
| C              | -3.577284 | 2.564878  | -0.123292 |
| C              | -2.631861 | 3.775698  | -0.220599 |
| C              | -4.449452 | 2.598024  | -1.400305 |
| C              | -4.431389 | 2.789351  | 1.146832  |
| C              | -3.537866 | -0.030825 | 0.067900  |
| C              | -2.802416 | -1.285998 | 0.148058  |
| C              | -3.549396 | -2.623890 | 0.262848  |
| C              | -2.577781 | -3.813834 | 0.338027  |
| C              | -4.401776 | -2.646873 | 1.550350  |
| C              | -4.441904 | -2.840560 | -0.978922 |
| C              | -1.441756 | -1.229911 | 0.120441  |
| C              | 1.465787  | -1.235106 | -0.074106 |
| C              | 2.815423  | -1.289355 | -0.100681 |
| C              | 3.580940  | -2.603621 | -0.216839 |
| C              | 2.632027  | -3.809946 | -0.299252 |
| C              | 4.480582  | -2.794185 | 1.027930  |

|    |           |           |           |
|----|-----------|-----------|-----------|
| C  | 4.446011  | -2.593640 | -1.499706 |
| C  | 3.577448  | 0.001038  | -0.015747 |
| O  | 4.795071  | 0.004973  | -0.025651 |
| H  | 1.985982  | 3.763882  | 1.163991  |
| H  | 1.976431  | 3.895408  | -0.608339 |
| H  | 3.204178  | 4.723444  | 0.337641  |
| H  | 5.201567  | 2.021840  | -1.170711 |
| H  | 3.831518  | 2.793251  | -1.986511 |
| H  | 4.949644  | 3.762981  | -1.025461 |
| H  | 5.213915  | 1.827596  | 1.408483  |
| H  | 4.963406  | 3.570808  | 1.526909  |
| H  | 3.853097  | 2.468929  | 2.343771  |
| H  | 0.907291  | 2.142511  | 0.174190  |
| H  | -0.915984 | 2.126870  | -0.118714 |
| H  | -1.990018 | 3.863329  | 0.657283  |
| H  | -2.002572 | 3.731016  | -1.110683 |
| H  | -3.221239 | 4.691209  | -0.284871 |
| H  | -5.106114 | 1.731608  | -1.509855 |
| H  | -5.054040 | 3.506626  | -1.426209 |
| H  | -3.821286 | 2.592694  | -2.291795 |
| H  | -5.084940 | 1.949454  | 1.394214  |
| H  | -5.036752 | 3.692083  | 1.044927  |
| H  | -3.790738 | 2.917061  | 2.020120  |
| H  | -1.956436 | -3.895476 | -0.556260 |
| H  | -1.927557 | -3.760086 | 1.213646  |
| H  | -3.151343 | -4.737430 | 0.418020  |
| H  | -5.156788 | -1.865236 | 1.552823  |
| H  | -3.771865 | -2.519726 | 2.433003  |
| H  | -4.908620 | -3.609478 | 1.637661  |
| H  | -4.946297 | -3.805492 | -0.903837 |
| H  | -3.840804 | -2.847827 | -1.890330 |
| H  | -5.200431 | -2.068412 | -1.075043 |
| H  | -0.897752 | -2.153790 | 0.194478  |
| H  | 0.915814  | -2.155659 | -0.151637 |
| H  | 3.223558  | -4.721778 | -0.380101 |
| H  | 2.009507  | -3.905912 | 0.593261  |
| H  | 1.984171  | -3.765030 | -1.177607 |
| H  | 5.233485  | -2.015257 | 1.105060  |
| H  | 4.988720  | -3.757238 | 0.956314  |
| H  | 3.882770  | -2.798648 | 1.941957  |
| H  | 4.953730  | -3.554815 | -1.595181 |
| H  | 3.823707  | -2.454695 | -2.386442 |
| H  | 5.198702  | -1.811090 | -1.473266 |
| O  | -4.805075 | -0.035062 | 0.081309  |
| Li | -6.275151 | 0.839756  | 0.028223  |

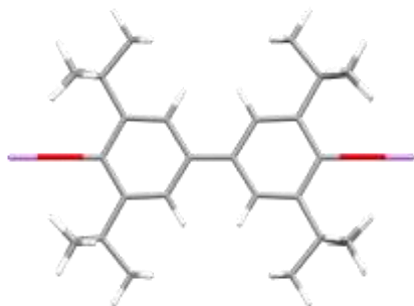

| <i>Element</i> | <i>X</i>  | <i>Y</i>  | <i>Z</i>  |
|----------------|-----------|-----------|-----------|
| C              | -2.594868 | -3.811055 | -0.124174 |
| C              | -3.563020 | -2.615306 | -0.087929 |
| C              | -4.425430 | -2.697233 | -1.367682 |
| C              | -4.433726 | -2.781813 | 1.178087  |
| C              | -2.810666 | -1.278219 | -0.040756 |
| C              | -1.456488 | -1.224849 | -0.034319 |
| C              | -0.702032 | 0.000885  | -0.000541 |
| C              | 0.702038  | 0.001271  | 0.000505  |
| C              | 1.457159  | -1.223981 | 0.036806  |
| C              | 2.811366  | -1.276608 | 0.043354  |
| C              | 3.564433  | -2.613192 | 0.093286  |
| C              | 2.596934  | -3.809387 | 0.131971  |
| C              | 4.435249  | -2.781831 | -1.172373 |
| C              | 4.426869  | -2.692030 | 1.373214  |
| C              | 3.546668  | 0.002005  | 0.002592  |
| C              | 2.810761  | 1.280241  | -0.039223 |
| C              | 3.563215  | 2.617213  | -0.088004 |
| C              | 2.595149  | 3.812909  | -0.128057 |
| C              | 4.432091  | 2.786252  | 1.178934  |
| C              | 4.427478  | 2.696550  | -1.366670 |
| C              | 1.456575  | 1.226916  | -0.034666 |
| C              | -1.457236 | 1.226191  | 0.032119  |
| C              | -2.811454 | 1.278795  | 0.036570  |
| C              | -3.564628 | 2.615457  | 0.082636  |
| C              | -2.597218 | 3.811759  | 0.120220  |
| C              | -4.428907 | 2.696934  | 1.361153  |
| C              | -4.433623 | 2.781431  | -1.184627 |
| C              | -3.546664 | 0.000082  | -0.002619 |
| H              | -1.964043 | -3.856726 | 0.765768  |
| H              | -1.958106 | -3.798086 | -1.010941 |
| H              | -3.171246 | -4.735202 | -0.156630 |
| H              | -5.170522 | -1.906597 | -1.424394 |
| H              | -3.803276 | -2.627930 | -2.261320 |
| H              | -4.946179 | -3.654957 | -1.397294 |
| H              | -5.180060 | -1.997194 | 1.281800  |
| H              | -4.953522 | -3.739796 | 1.141020  |
| H              | -3.817616 | -2.771069 | 2.078505  |

|    |           |           |           |
|----|-----------|-----------|-----------|
| H  | -0.915677 | -2.152396 | -0.070445 |
| H  | 0.916849  | -2.151743 | 0.074844  |
| H  | 1.960142  | -3.794942 | 1.018695  |
| H  | 1.966151  | -3.857236 | -0.757886 |
| H  | 3.173809  | -4.733155 | 0.166340  |
| H  | 5.181104  | -1.996977 | -1.277732 |
| H  | 4.955632  | -3.739413 | -1.133287 |
| H  | 3.819139  | -2.773350 | -2.072815 |
| H  | 5.171532  | -1.900876 | 1.428319  |
| H  | 4.948146  | -3.649402 | 1.404787  |
| H  | 3.804667  | -2.621230 | 2.266700  |
| H  | 1.959702  | 3.798195  | -1.015740 |
| H  | 1.963005  | 3.860357  | 0.760855  |
| H  | 3.171595  | 4.736977  | -0.161493 |
| H  | 5.178253  | 2.001828  | 1.285310  |
| H  | 3.814676  | 2.777338  | 2.078477  |
| H  | 4.951963  | 3.744148  | 1.140690  |
| H  | 4.948296  | 3.654199  | -1.397451 |
| H  | 3.806617  | 2.625469  | -2.261066 |
| H  | 5.172629  | 1.905784  | -1.420720 |
| H  | 0.915848  | 2.154402  | -0.073474 |
| H  | -0.917011 | 2.154047  | 0.069032  |
| H  | -3.174166 | 4.735579  | 0.151837  |
| H  | -1.961702 | 3.799178  | 1.007888  |
| H  | -1.965157 | 3.857772  | -0.768826 |
| H  | -5.173602 | 1.905851  | 1.416855  |
| H  | -4.950284 | 3.654340  | 1.389964  |
| H  | -3.807985 | 2.628052  | 2.255679  |
| H  | -4.954069 | 3.739088  | -1.148300 |
| H  | -3.816218 | 2.771064  | -2.084161 |
| H  | -5.179322 | 1.996349  | -1.289415 |
| O  | 4.797391  | 0.002336  | 0.003493  |
| Li | 6.522499  | 0.002683  | 0.004748  |
| O  | -4.797389 | -0.000285 | -0.003498 |
| Li | -6.522496 | -0.000623 | -0.004618 |

B3LYP/def2TZVP (CPCM – DME)

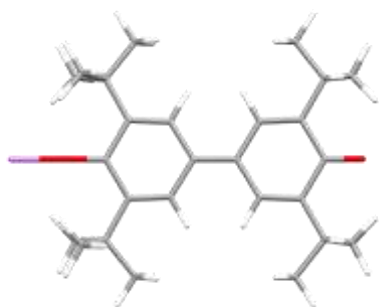

| <i>Element</i> | <i>X</i>  | <i>Y</i>  | <i>Z</i>  |
|----------------|-----------|-----------|-----------|
| C              | 2.620753  | 3.818846  | -0.008756 |
| C              | 3.575358  | 2.613650  | 0.005537  |
| C              | 4.471847  | 2.713473  | -1.249622 |
| C              | 4.438237  | 2.717041  | 1.283847  |
| C              | 2.815224  | 1.285702  | -0.002251 |
| C              | 1.465984  | 1.231304  | -0.015651 |
| C              | 0.712579  | 0.001148  | -0.019676 |
| C              | -0.689331 | 0.000324  | -0.015195 |
| C              | -1.447028 | 1.221360  | -0.012217 |
| C              | -2.800544 | 1.270703  | 0.040637  |
| C              | -3.552761 | 2.608691  | 0.036282  |
| C              | -2.594749 | 3.804130  | -0.106440 |
| C              | -4.526912 | 2.666601  | -1.161068 |
| C              | -4.312595 | 2.792184  | 1.368114  |
| C              | -3.544330 | -0.001305 | 0.117785  |
| C              | -2.799064 | -1.272481 | 0.041229  |
| C              | -3.549740 | -2.611340 | 0.037515  |
| C              | -2.590333 | -3.805730 | -0.104624 |
| C              | -4.309393 | -2.795083 | 1.369418  |
| C              | -4.523824 | -2.670957 | -1.159808 |
| C              | -1.445605 | -1.221593 | -0.011662 |
| C              | 1.467436  | -1.228117 | -0.015355 |
| C              | 2.816741  | -1.280914 | -0.001960 |
| C              | 3.578449  | -2.607957 | 0.006099  |
| C              | 2.625273  | -3.814287 | -0.007928 |
| C              | 4.441464  | -2.710055 | 1.284422  |
| C              | 4.475042  | -2.706982 | -1.249049 |
| C              | 3.579439  | 0.002847  | 0.008026  |
| O              | 4.805310  | 0.003574  | 0.024562  |
| H              | 1.973185  | 3.839635  | 0.870273  |
| H              | 1.994394  | 3.835258  | -0.903106 |
| H              | 3.209574  | 4.736892  | -0.003806 |
| H              | 5.220283  | 1.926194  | -1.271842 |
| H              | 3.869050  | 2.649357  | -2.158229 |
| H              | 4.983537  | 3.678146  | -1.252522 |
| H              | 5.186072  | 1.930103  | 1.328026  |
| H              | 4.949289  | 3.681964  | 1.297851  |
| H              | 3.811500  | 2.654991  | 2.176272  |
| H              | 0.917595  | 2.155554  | -0.020096 |
| H              | -0.906829 | 2.149107  | -0.053732 |
| H              | -1.894337 | 3.872664  | 0.728052  |
| H              | -2.024699 | 3.763181  | -1.036705 |
| H              | -3.178409 | 4.725533  | -0.118511 |
| H              | -5.271687 | 1.876621  | -1.125956 |
| H              | -5.046301 | 3.626998  | -1.163950 |
| H              | -3.979734 | 2.577551  | -2.101940 |
| H              | -5.028706 | 1.994864  | 1.544012  |

|    |           |           |           |
|----|-----------|-----------|-----------|
| H  | -4.850527 | 3.742446  | 1.356347  |
| H  | -3.612363 | 2.811596  | 2.205757  |
| H  | -2.020318 | -3.764562 | -1.034900 |
| H  | -1.889852 | -3.873045 | 0.729911  |
| H  | -3.172915 | -4.727819 | -0.116261 |
| H  | -5.026556 | -1.998602 | 1.544836  |
| H  | -3.609179 | -2.813135 | 2.207105  |
| H  | -4.846090 | -3.746050 | 1.358139  |
| H  | -5.042015 | -3.632002 | -1.162280 |
| H  | -3.976767 | -2.581625 | -2.100724 |
| H  | -5.269588 | -1.881894 | -1.125008 |
| H  | -0.904323 | -2.148730 | -0.052716 |
| H  | 0.920139  | -2.153015 | -0.019616 |
| H  | 3.215183  | -4.731634 | -0.002787 |
| H  | 1.977737  | -3.835656 | 0.871110  |
| H  | 1.998928  | -3.831633 | -0.902271 |
| H  | 5.188367  | -1.922223 | 1.328425  |
| H  | 4.953659  | -3.674369 | 1.298624  |
| H  | 3.814664  | -2.648559 | 2.176841  |
| H  | 4.987876  | -3.671048 | -1.251751 |
| H  | 3.872159  | -2.643772 | -2.157662 |
| H  | 5.222544  | -1.918821 | -1.271444 |
| O  | -4.784002 | -0.002022 | 0.246785  |
| Li | -6.622337 | -0.002603 | 0.438107  |

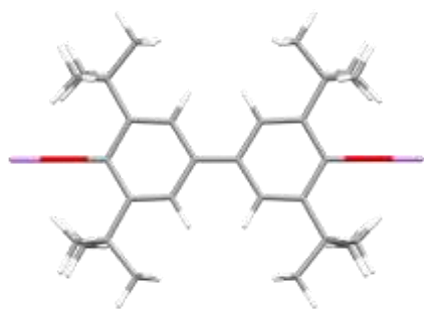

| <i>Element</i> | <i>X</i>  | <i>Y</i>  | <i>Z</i>  |
|----------------|-----------|-----------|-----------|
| C              | -2.596869 | -3.812509 | 0.157841  |
| C              | -3.554660 | -2.617830 | 0.009944  |
| C              | -4.294830 | -2.789356 | -1.335201 |
| C              | -4.546962 | -2.683319 | 1.192249  |
| C              | -2.803951 | -1.281265 | 0.023586  |
| C              | -1.453805 | -1.227017 | 0.090982  |
| C              | -0.700401 | -0.000020 | 0.099244  |
| C              | 0.700269  | 0.002357  | 0.100177  |
| C              | 1.457845  | -1.222074 | 0.092910  |
| C              | 2.808256  | -1.271736 | 0.027319  |
| C              | 3.563517  | -2.605744 | 0.014669  |

|   |           |           |           |
|---|-----------|-----------|-----------|
| C | 2.609590  | -3.803669 | 0.161273  |
| C | 4.306065  | -2.774737 | -1.329486 |
| C | 4.554452  | -2.667881 | 1.198301  |
| C | 3.552097  | 0.007008  | -0.053176 |
| C | 2.803923  | 1.283413  | 0.024222  |
| C | 3.554654  | 2.619942  | 0.008335  |
| C | 2.596667  | 3.814974  | 0.152042  |
| C | 4.545371  | 2.688310  | 1.191807  |
| C | 4.296624  | 2.788197  | -1.336231 |
| C | 1.453688  | 1.229330  | 0.089940  |
| C | -1.457967 | 1.224387  | 0.087988  |
| C | -2.808290 | 1.273884  | 0.020466  |
| C | -3.563533 | 2.607855  | 0.003561  |
| C | -2.609805 | 3.806136  | 0.148535  |
| C | -4.556056 | 2.672864  | 1.185709  |
| C | -4.304275 | 2.773579  | -1.341996 |
| C | -3.552022 | -0.005055 | -0.057916 |
| H | -2.040740 | -3.777379 | 1.096732  |
| H | -1.885037 | -3.874625 | -0.667445 |
| H | -3.179481 | -4.734362 | 0.155098  |
| H | -5.009070 | -1.991162 | -1.515427 |
| H | -3.582816 | -2.802632 | -2.162810 |
| H | -4.832512 | -3.739477 | -1.337441 |
| H | -5.298574 | -1.900781 | 1.144695  |
| H | -5.057087 | -3.648302 | 1.185037  |
| H | -4.016330 | -2.590536 | 2.142041  |
| H | -0.909674 | -2.152215 | 0.135569  |
| H | 0.916800  | -2.149115 | 0.136756  |
| H | 2.052089  | -3.770439 | 1.099419  |
| H | 1.899077  | -3.868189 | -0.664965 |
| H | 3.195330  | -4.723539 | 0.159301  |
| H | 5.017835  | -1.974124 | -1.508746 |
| H | 4.846966  | -3.723031 | -1.331018 |
| H | 3.595208  | -2.790412 | -2.158047 |
| H | 5.303468  | -1.882797 | 1.151761  |
| H | 5.067858  | -3.631127 | 1.191763  |
| H | 4.022237  | -2.576913 | 2.147382  |
| H | 1.885942  | 3.875081  | -0.674346 |
| H | 2.039280  | 3.782125  | 1.090270  |
| H | 3.179283  | 4.736819  | 0.147839  |
| H | 5.297048  | 1.905663  | 1.147164  |
| H | 4.013466  | 2.597835  | 2.141109  |
| H | 5.055503  | 3.653275  | 1.182931  |
| H | 4.834307  | 3.738313  | -1.340063 |
| H | 3.585719  | 2.799455  | -2.164822 |
| H | 5.011106  | 1.989571  | -1.513558 |

|    |           |           |           |
|----|-----------|-----------|-----------|
| H  | 0.909503  | 2.154634  | 0.131546  |
| H  | -0.916983 | 2.151534  | 0.130308  |
| H  | -3.195543 | 4.725996  | 0.143546  |
| H  | -2.053560 | 3.775186  | 1.087505  |
| H  | -1.898187 | 3.868654  | -0.676906 |
| H  | -5.305009 | 1.887666  | 1.140072  |
| H  | -5.069453 | 3.636090  | 1.176140  |
| H  | -4.025116 | 2.584206  | 2.135721  |
| H  | -4.845178 | 3.721862  | -1.346556 |
| H  | -3.592307 | 2.787248  | -2.169637 |
| H  | -5.015801 | 1.972528  | -1.520268 |
| O  | 4.785065  | 0.008938  | -0.185794 |
| Li | 6.646103  | 0.011786  | -0.443996 |
| O  | -4.784810 | -0.007312 | -0.192183 |
| Li | -6.645496 | -0.010784 | -0.452866 |

*Singly Reduced*

PBE/def2TZVP

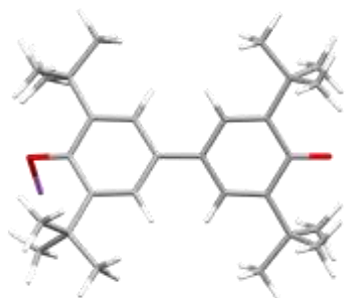

| <i>Element</i> | <i>X</i>  | <i>Y</i>  | <i>Z</i>  |
|----------------|-----------|-----------|-----------|
| C              | 2.623087  | -3.718829 | -0.859787 |
| C              | 3.580056  | -2.544664 | -0.592484 |
| C              | 4.458249  | -2.923446 | 0.623539  |
| C              | 4.470299  | -2.368962 | -1.844974 |
| C              | 2.828610  | -1.241899 | -0.300603 |
| C              | 1.453197  | -1.186801 | -0.296989 |
| C              | 0.721514  | 0.005385  | -0.048401 |
| C              | -0.734931 | 0.008864  | -0.064042 |
| C              | -1.474063 | -1.174754 | 0.135522  |
| C              | -2.866657 | -1.213352 | 0.108813  |
| C              | -3.624356 | -2.490611 | 0.558146  |
| C              | -2.656369 | -3.623728 | 0.940112  |
| C              | -4.478073 | -2.145349 | 1.798183  |
| C              | -4.563778 | -3.073590 | -0.533128 |
| C              | -3.594210 | 0.005939  | -0.200506 |
| C              | -2.857004 | 1.245063  | -0.318604 |
| C              | -3.605068 | 2.570545  | -0.535737 |

|   |           |           |           |
|---|-----------|-----------|-----------|
| C | -2.651009 | 3.777131  | -0.540302 |
| C | -4.342748 | 2.556077  | -1.894329 |
| C | -4.623189 | 2.781510  | 0.607411  |
| C | -1.474329 | 1.202068  | -0.251334 |
| C | 1.459388  | 1.190349  | 0.212986  |
| C | 2.835398  | 1.231702  | 0.240750  |
| C | 3.593050  | 2.527104  | 0.548438  |
| C | 2.641887  | 3.708689  | 0.803161  |
| C | 4.494996  | 2.901036  | -0.651700 |
| C | 4.460583  | 2.339544  | 1.815191  |
| C | 3.592287  | -0.008301 | -0.024338 |
| O | 4.850465  | -0.014472 | -0.015471 |
| H | 1.985491  | -3.541406 | -1.739656 |
| H | 1.974208  | -3.928658 | 0.004682  |
| H | 3.213602  | -4.625449 | -1.057220 |
| H | 5.198559  | -2.142639 | 0.829483  |
| H | 3.836802  | -3.066991 | 1.520645  |
| H | 4.985421  | -3.868742 | 0.420064  |
| H | 5.210266  | -1.575864 | -1.690935 |
| H | 4.998827  | -3.310967 | -2.059847 |
| H | 3.857339  | -2.115084 | -2.723350 |
| H | 0.888354  | -2.087647 | -0.533137 |
| H | -0.923623 | -2.081048 | 0.379497  |
| H | -2.039592 | -3.952844 | 0.089748  |
| H | -1.984665 | -3.323487 | 1.755812  |
| H | -3.233821 | -4.491832 | 1.290334  |
| H | -5.192483 | -1.344360 | 1.569515  |
| H | -5.035224 | -3.031362 | 2.141301  |
| H | -3.829422 | -1.811229 | 2.619965  |
| H | -5.479613 | -2.467986 | -0.653968 |
| H | -4.919839 | -4.072597 | -0.243762 |
| H | -4.032342 | -3.224111 | -1.495348 |
| H | -2.086164 | 3.857912  | 0.400513  |
| H | -1.932958 | 3.738628  | -1.373517 |
| H | -3.238578 | 4.699738  | -0.654921 |
| H | -5.115935 | 1.778374  | -1.910441 |
| H | -3.633908 | 2.383899  | -2.719667 |
| H | -4.830100 | 3.527953  | -2.068863 |
| H | -5.165832 | 3.727602  | 0.455840  |
| H | -4.106230 | 2.839192  | 1.576986  |
| H | -5.350382 | 1.962022  | 0.645023  |
| H | -0.918002 | 2.126613  | -0.393396 |
| H | 0.900582  | 2.096863  | 0.439488  |
| H | 3.237002  | 4.609262  | 1.013779  |
| H | 2.009731  | 3.927630  | -0.071231 |
| H | 1.987450  | 3.534863  | 1.671035  |
| H | 5.232423  | 2.114870  | -0.847548 |
| H | 5.026207  | 3.841403  | -0.436485 |

|    |           |           |           |
|----|-----------|-----------|-----------|
| H  | 3.889869  | 3.052828  | -1.558581 |
| H  | 4.992718  | 3.276674  | 2.041802  |
| H  | 3.830654  | 2.088619  | 2.682209  |
| H  | 5.196902  | 1.541084  | 1.671471  |
| O  | -4.888079 | -0.047951 | -0.430985 |
| Li | -4.522875 | -1.169678 | -1.742062 |

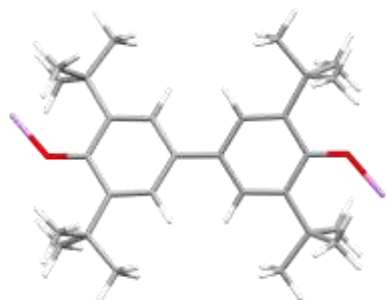

| <i>Element</i> | <i>X</i>  | <i>Y</i>  | <i>Z</i>  |
|----------------|-----------|-----------|-----------|
| C              | 2.723152  | -3.738422 | -0.573351 |
| C              | 3.635000  | -2.518096 | -0.356320 |
| C              | 4.481189  | -2.842514 | 0.911255  |
| C              | 4.511163  | -2.409374 | -1.639708 |
| C              | 2.853042  | -1.212492 | -0.141321 |
| C              | 1.474309  | -1.193146 | -0.155190 |
| C              | 0.724433  | -0.000922 | 0.021182  |
| C              | -0.724785 | -0.011151 | -0.008216 |
| C              | -1.463736 | -1.212165 | 0.155889  |
| C              | -2.843111 | -1.274612 | 0.138888  |
| C              | -3.584017 | -2.603397 | 0.344629  |
| C              | -2.613219 | -3.777673 | 0.557561  |
| C              | -4.487089 | -2.516162 | 1.596552  |
| C              | -4.435555 | -2.927680 | -0.904859 |
| C              | -3.581374 | -0.042095 | -0.071978 |
| C              | -2.845291 | 1.202232  | -0.245785 |
| C              | -3.618142 | 2.509875  | -0.480428 |
| C              | -2.698477 | 3.731950  | -0.649290 |
| C              | -4.441601 | 2.412949  | -1.799173 |
| C              | -4.515020 | 2.822948  | 0.754734  |
| C              | -1.467123 | 1.182760  | -0.203993 |
| C              | 1.455914  | 1.198420  | 0.225948  |
| C              | 2.834835  | 1.260765  | 0.265379  |
| C              | 3.566560  | 2.587495  | 0.512983  |
| C              | 2.587720  | 3.759972  | 0.697065  |
| C              | 4.467932  | 2.922931  | -0.698011 |
| C              | 4.418215  | 2.488753  | 1.799603  |
| C              | 3.581256  | 0.030073  | 0.073417  |
| H              | 2.094392  | -3.622788 | -1.467396 |

|    |           |           |           |
|----|-----------|-----------|-----------|
| H  | 2.070532  | -3.917319 | 0.292846  |
| H  | 3.338428  | -4.639117 | -0.715777 |
| H  | 5.229847  | -3.626650 | 0.706422  |
| H  | 4.956059  | -1.963605 | 1.381356  |
| H  | 3.827951  | -3.234344 | 1.702380  |
| H  | 4.994993  | -1.427052 | -1.780660 |
| H  | 5.257054  | -3.220790 | -1.689164 |
| H  | 3.877499  | -2.513422 | -2.530663 |
| H  | 0.935059  | -2.118820 | -0.345093 |
| H  | -0.910566 | -2.129384 | 0.343874  |
| H  | -1.953598 | -3.933106 | -0.309940 |
| H  | -1.989768 | -3.643728 | 1.454609  |
| H  | -3.193186 | -4.700771 | 0.696864  |
| H  | -5.242509 | -1.729504 | 1.493046  |
| H  | -5.003760 | -3.475629 | 1.748273  |
| H  | -3.886799 | -2.310203 | 2.495247  |
| H  | -5.190196 | -2.154961 | -1.087904 |
| H  | -4.950229 | -3.889664 | -0.762417 |
| H  | -3.798575 | -3.014391 | -1.797774 |
| H  | -2.081498 | 3.902868  | 0.244207  |
| H  | -2.034012 | 3.624309  | -1.518155 |
| H  | -3.307648 | 4.634012  | -0.808342 |
| H  | -5.185030 | 3.224915  | -1.871434 |
| H  | -4.919144 | 1.432033  | -1.968500 |
| H  | -3.772401 | 2.524956  | -2.662759 |
| H  | -5.254914 | 3.609046  | 0.526870  |
| H  | -3.894422 | 3.207471  | 1.575177  |
| H  | -5.008374 | 1.939902  | 1.197237  |
| H  | -0.920797 | 2.110018  | -0.363510 |
| H  | 0.895418  | 2.113999  | 0.399684  |
| H  | 3.161402  | 4.681663  | 0.868096  |
| H  | 1.963738  | 3.923380  | -0.194989 |
| H  | 1.928483  | 3.618018  | 1.566883  |
| H  | 5.229507  | 2.151763  | -0.857345 |
| H  | 4.976240  | 3.883490  | -0.526135 |
| H  | 3.867613  | 3.017846  | -1.615163 |
| H  | 4.928144  | 3.446710  | 1.980809  |
| H  | 3.782067  | 2.274769  | 2.671352  |
| H  | 5.177351  | 1.702926  | 1.719646  |
| O  | -4.874646 | -0.043582 | -0.105932 |
| Li | -6.002971 | 1.271121  | -0.346763 |
| O  | 4.874842  | 0.031631  | 0.091873  |
| Li | 6.012237  | -1.281040 | -0.114979 |

B3LYP/def2TZVP

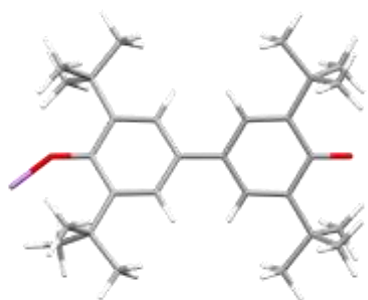

| <i>Element</i> | <i>X</i>  | <i>Y</i>  | <i>Z</i>  |
|----------------|-----------|-----------|-----------|
| C              | 2.657020  | -3.716928 | -0.801923 |
| C              | 3.606164  | -2.537238 | -0.533707 |
| C              | 4.476101  | -2.909407 | 0.687866  |
| C              | 4.501332  | -2.366711 | -1.781124 |
| C              | 2.845225  | -1.236844 | -0.253385 |
| C              | 1.478071  | -1.184774 | -0.259074 |
| C              | 0.742693  | 0.002723  | -0.023236 |
| C              | -0.712207 | 0.003757  | -0.044738 |
| C              | -1.450744 | -1.169701 | 0.181632  |
| C              | -2.831469 | -1.197918 | 0.168481  |
| C              | -3.601585 | -2.487390 | 0.504915  |
| C              | -2.672007 | -3.701644 | 0.674296  |
| C              | -4.343067 | -2.295758 | 1.847069  |
| C              | -4.616029 | -2.852075 | -0.630500 |
| C              | -3.554307 | 0.008825  | -0.110961 |
| C              | -2.826940 | 1.222611  | -0.330424 |
| C              | -3.568453 | 2.540408  | -0.617418 |
| C              | -2.604769 | 3.726774  | -0.790220 |
| C              | -4.379252 | 2.420764  | -1.925107 |
| C              | -4.507204 | 2.884655  | 0.558678  |
| C              | -1.446418 | 1.179059  | -0.286835 |
| C              | 1.474057  | 1.187995  | 0.233768  |
| C              | 2.841145  | 1.235458  | 0.269156  |
| C              | 3.596986  | 2.533839  | 0.571404  |
| C              | 2.643519  | 3.716423  | 0.809426  |
| C              | 4.504895  | 2.901909  | -0.623574 |
| C              | 4.453314  | 2.361465  | 1.845594  |
| C              | 3.599221  | -0.001886 | 0.019646  |
| O              | 4.846192  | -0.004442 | 0.038791  |
| H              | 2.028807  | -3.546577 | -1.679052 |
| H              | 2.009075  | -3.923443 | 0.052992  |
| H              | 3.247412  | -4.615382 | -0.990603 |
| H              | 5.211269  | -2.136926 | 0.895691  |
| H              | 3.852566  | -3.046712 | 1.574706  |
| H              | 4.999775  | -3.849435 | 0.495298  |
| H              | 5.237328  | -1.581561 | -1.631458 |

|    |           |           |           |
|----|-----------|-----------|-----------|
| H  | 5.025449  | -3.302889 | -1.990440 |
| H  | 3.895823  | -2.116781 | -2.655736 |
| H  | 0.919632  | -2.077763 | -0.490463 |
| H  | -0.907594 | -2.072062 | 0.411824  |
| H  | -2.100546 | -3.904271 | -0.233451 |
| H  | -1.970654 | -3.562192 | 1.497132  |
| H  | -3.268676 | -4.587947 | 0.901008  |
| H  | -4.998968 | -1.425643 | 1.820650  |
| H  | -4.934345 | -3.182238 | 2.094797  |
| H  | -3.623048 | -2.136490 | 2.650593  |
| H  | -5.648322 | -2.912405 | -0.246503 |
| H  | -4.425677 | -3.845740 | -1.036515 |
| H  | -4.555689 | -2.161169 | -1.474413 |
| H  | -2.003200 | 3.897679  | 0.104677  |
| H  | -1.930167 | 3.588803  | -1.637486 |
| H  | -3.182491 | 4.634350  | -0.975801 |
| H  | -5.117495 | 1.625661  | -1.858051 |
| H  | -3.716955 | 2.207330  | -2.767130 |
| H  | -4.899119 | 3.359544  | -2.133979 |
| H  | -5.037180 | 3.819005  | 0.354684  |
| H  | -3.931413 | 3.018394  | 1.477162  |
| H  | -5.238237 | 2.097692  | 0.724564  |
| H  | -0.893359 | 2.082699  | -0.483872 |
| H  | 0.911746  | 2.082935  | 0.446711  |
| H  | 3.230576  | 4.613341  | 1.014890  |
| H  | 2.022070  | 3.924031  | -0.064512 |
| H  | 1.988579  | 3.549321  | 1.667306  |
| H  | 5.244201  | 2.127443  | -0.808211 |
| H  | 5.024789  | 3.840777  | -0.415955 |
| H  | 3.908987  | 3.040258  | -1.529008 |
| H  | 4.973274  | 3.296421  | 2.069959  |
| H  | 3.820655  | 2.114375  | 2.701579  |
| H  | 5.191466  | 1.574202  | 1.719223  |
| O  | -4.859607 | -0.013220 | -0.170552 |
| Li | -6.142200 | -0.991022 | -0.566954 |

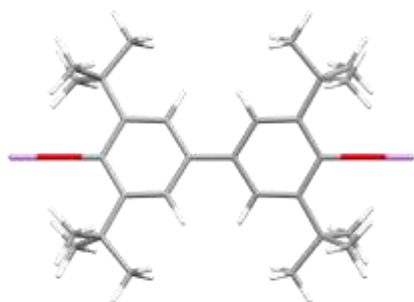

| <i>Element</i> | <i>X</i> | <i>Y</i> | <i>Z</i> |
|----------------|----------|----------|----------|
|----------------|----------|----------|----------|

|   |           |           |           |
|---|-----------|-----------|-----------|
| C | 2.622452  | -3.748471 | -0.582934 |
| C | 3.585102  | -2.567132 | -0.365613 |
| C | 4.432788  | -2.911931 | 0.878154  |
| C | 4.471531  | -2.481372 | -1.626732 |
| C | 2.836523  | -1.240516 | -0.147396 |
| C | 1.465397  | -1.196626 | -0.160622 |
| C | 0.721079  | -0.005766 | 0.012426  |
| C | -0.721088 | -0.006208 | -0.016793 |
| C | -1.464461 | -1.199170 | 0.145495  |
| C | -2.835548 | -1.244037 | 0.131857  |
| C | -3.583055 | -2.573173 | 0.338064  |
| C | -2.619445 | -3.755633 | 0.544766  |
| C | -4.469612 | -2.499531 | 1.599857  |
| C | -4.430423 | -2.907403 | -0.908794 |
| C | -3.559419 | -0.007074 | -0.074294 |
| C | -2.828546 | 1.230331  | -0.250972 |
| C | -3.567903 | 2.559016  | -0.487277 |
| C | -2.597443 | 3.742069  | -0.654827 |
| C | -4.402638 | 2.484863  | -1.783915 |
| C | -4.465227 | 2.892699  | 0.724280  |
| C | -1.458004 | 1.186303  | -0.209069 |
| C | 1.457049  | 1.185547  | 0.215465  |
| C | 2.827558  | 1.230289  | 0.257790  |
| C | 3.565861  | 2.557363  | 0.506131  |
| C | 2.594449  | 3.738078  | 0.684317  |
| C | 4.462992  | 2.902691  | -0.702297 |
| C | 4.400589  | 2.472124  | 1.802081  |
| C | 3.559410  | -0.004890 | 0.069943  |
| H | 1.999670  | -3.612291 | -1.468846 |
| H | 1.972321  | -3.911081 | 0.278687  |
| H | 3.202302  | -4.660720 | -0.729747 |
| H | 4.973036  | -3.847065 | 0.716427  |
| H | 5.154314  | -2.132493 | 1.112126  |
| H | 3.793690  | -3.040212 | 1.753574  |
| H | 5.193761  | -1.670366 | -1.566596 |
| H | 5.013953  | -3.418434 | -1.768826 |
| H | 3.859306  | -2.309942 | -2.513880 |
| H | 0.922158  | -2.106592 | -0.348749 |
| H | -0.920495 | -2.110360 | 0.325406  |
| H | -1.969103 | -3.909898 | -0.318227 |
| H | -1.996855 | -3.626969 | 1.431938  |
| H | -3.198551 | -4.669654 | 0.683251  |
| H | -5.192862 | -1.688949 | 1.546786  |
| H | -5.010903 | -3.438459 | 1.733698  |
| H | -3.857620 | -2.335156 | 2.488497  |
| H | -5.152451 | -2.126381 | -1.135781 |

|    |           |           |           |
|----|-----------|-----------|-----------|
| H  | -4.970038 | -3.844319 | -0.755485 |
| H  | -3.791187 | -3.027405 | -1.785284 |
| H  | -1.982666 | 3.896734  | 0.233783  |
| H  | -1.939368 | 3.613789  | -1.516063 |
| H  | -3.171031 | 4.655733  | -0.816665 |
| H  | -4.938787 | 3.423397  | -1.939456 |
| H  | -5.126815 | 1.673714  | -1.760249 |
| H  | -3.755062 | 2.321069  | -2.647080 |
| H  | -4.998759 | 3.829295  | 0.549269  |
| H  | -3.862046 | 3.013057  | 1.625917  |
| H  | -5.195374 | 2.111234  | 0.921879  |
| H  | -0.907756 | 2.097829  | -0.366810 |
| H  | 0.906076  | 2.095175  | 0.381424  |
| H  | 3.167303  | 4.650701  | 0.854416  |
| H  | 1.979575  | 3.900267  | -0.202885 |
| H  | 1.936451  | 3.601504  | 1.544337  |
| H  | 5.193801  | 2.123640  | -0.906844 |
| H  | 4.995747  | 3.838106  | -0.518799 |
| H  | 3.859775  | 3.030692  | -1.602858 |
| H  | 4.935810  | 3.409718  | 1.966258  |
| H  | 3.753134  | 2.299780  | 2.663672  |
| H  | 5.125579  | 1.661956  | 1.770971  |
| O  | -4.844902 | -0.007461 | -0.100345 |
| Li | -6.501423 | -0.007921 | -0.133922 |
| O  | 4.844900  | -0.004501 | 0.096007  |
| Li | 6.501417  | -0.005006 | 0.129409  |

B3LYP/def2TZVP (CPCM – DME)

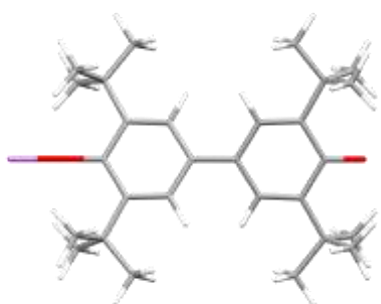

| <i>Element</i> | <i>X</i> | <i>Y</i>  | <i>Z</i>  |
|----------------|----------|-----------|-----------|
| C              | 2.643143 | -3.765133 | -0.567667 |
| C              | 3.598415 | -2.575599 | -0.373563 |
| C              | 4.465582 | -2.879896 | 0.868093  |
| C              | 4.492790 | -2.493189 | -1.630048 |
| C              | 2.846697 | -1.252191 | -0.173776 |
| C              | 1.478681 | -1.201827 | -0.178846 |
| C              | 0.735389 | -0.004414 | -0.015007 |

|   |           |           |           |
|---|-----------|-----------|-----------|
| C | -0.711657 | -0.002425 | -0.032562 |
| C | -1.459973 | -1.187717 | 0.139578  |
| C | -2.835929 | -1.229276 | 0.134461  |
| C | -3.579218 | -2.561080 | 0.343999  |
| C | -2.617165 | -3.744273 | 0.551943  |
| C | -4.470836 | -2.484979 | 1.601838  |
| C | -4.430898 | -2.892264 | -0.900407 |
| C | -3.574118 | 0.001517  | -0.067286 |
| C | -2.827866 | 1.230264  | -0.251036 |
| C | -3.562181 | 2.564101  | -0.478526 |
| C | -2.592107 | 3.744630  | -0.663042 |
| C | -4.423221 | 2.490407  | -1.757630 |
| C | -4.442880 | 2.897694  | 0.744859  |
| C | -1.452310 | 1.184917  | -0.222772 |
| C | 1.477773  | 1.190958  | 0.166856  |
| C | 2.845643  | 1.237569  | 0.194966  |
| C | 3.595923  | 2.558914  | 0.412976  |
| C | 2.639494  | 3.751078  | 0.583858  |
| C | 4.493812  | 2.860770  | -0.807255 |
| C | 4.459300  | 2.474104  | 1.690802  |
| C | 3.604455  | -0.008350 | 0.019782  |
| O | 4.858474  | -0.010077 | 0.035024  |
| H | 2.014970  | -3.646123 | -1.453015 |
| H | 1.993543  | -3.914606 | 0.297396  |
| H | 3.229788  | -4.676138 | -0.700373 |
| H | 5.198633  | -2.095416 | 1.036021  |
| H | 3.838758  | -2.969078 | 1.758821  |
| H | 4.991322  | -3.828404 | 0.730263  |
| H | 5.228738  | -1.699003 | -1.536515 |
| H | 5.016548  | -3.441600 | -1.775772 |
| H | 3.885760  | -2.304313 | -2.518946 |
| H | 0.927147  | -2.112197 | -0.347248 |
| H | -0.918115 | -2.102014 | 0.315171  |
| H | -1.964075 | -3.898666 | -0.309244 |
| H | -1.992636 | -3.614348 | 1.438015  |
| H | -3.199557 | -4.657303 | 0.690920  |
| H | -5.194848 | -1.677933 | 1.531534  |
| H | -5.009697 | -3.426333 | 1.738343  |
| H | -3.857862 | -2.316946 | 2.490545  |
| H | -4.978058 | -3.825844 | -0.744665 |
| H | -3.788666 | -3.020986 | -1.774865 |
| H | -5.145320 | -2.103128 | -1.117721 |
| H | -1.959723 | 3.897304  | 0.213764  |
| H | -1.946579 | 3.612912  | -1.533665 |
| H | -3.168432 | 4.659248  | -0.816153 |
| H | -5.150906 | 1.685324  | -1.704965 |
| H | -3.789319 | 2.320708  | -2.631210 |
| H | -4.956059 | 3.433216  | -1.907116 |

|    |           |          |           |
|----|-----------|----------|-----------|
| H  | -4.983529 | 3.832768 | 0.575897  |
| H  | -3.821691 | 3.024689 | 1.634635  |
| H  | -5.164537 | 2.110546 | 0.944774  |
| H  | -0.903837 | 2.097710 | -0.385144 |
| H  | 0.924816  | 2.102842 | 0.321875  |
| H  | 3.225245  | 4.660464 | 0.730851  |
| H  | 2.011543  | 3.902335 | -0.296741 |
| H  | 1.989646  | 3.633805 | 1.453657  |
| H  | 5.228558  | 2.074267 | -0.957359 |
| H  | 5.018660  | 3.807833 | -0.656678 |
| H  | 3.889043  | 2.951641 | -1.712935 |
| H  | 4.981961  | 3.421084 | 1.849226  |
| H  | 3.830354  | 2.286925 | 2.564695  |
| H  | 5.195128  | 1.677905 | 1.615141  |
| O  | -4.856642 | 0.003277 | -0.082846 |
| Li | -6.615261 | 0.005688 | -0.104183 |

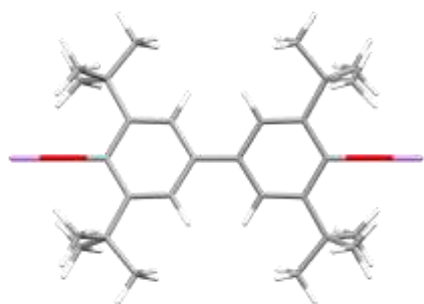

| <i>Element</i> | <i>X</i>  | <i>Y</i>  | <i>Z</i>  |
|----------------|-----------|-----------|-----------|
| C              | 2.623680  | -3.755783 | -0.540632 |
| C              | 3.585805  | -2.573303 | -0.329808 |
| C              | 4.426641  | -2.898231 | 0.923908  |
| C              | 4.487058  | -2.500906 | -1.581346 |
| C              | 2.839975  | -1.242993 | -0.132136 |
| C              | 1.468922  | -1.197789 | -0.147161 |
| C              | 0.721460  | -0.005773 | 0.012428  |
| C              | -0.721462 | -0.006216 | -0.016790 |
| C              | -1.467974 | -1.200214 | 0.132063  |
| C              | -2.838991 | -1.246371 | 0.116632  |
| C              | -3.583760 | -2.578999 | 0.302325  |
| C              | -2.620691 | -3.762561 | 0.502501  |
| C              | -4.485062 | -2.518586 | 1.554464  |
| C              | -4.424345 | -2.893301 | -0.954264 |
| C              | -3.578774 | -0.007094 | -0.074643 |
| C              | -2.832616 | 1.232640  | -0.235833 |
| C              | -3.570078 | 2.564812  | -0.451541 |
| C              | -2.600424 | 3.748967  | -0.612591 |
| C              | -4.419923 | 2.503855  | -1.739134 |

|   |           |           |           |
|---|-----------|-----------|-----------|
| C | -4.461028 | 2.878587  | 0.769990  |
| C | -1.462070 | 1.187325  | -0.195755 |
| C | 1.461120  | 1.186697  | 0.202134  |
| C | 2.831629  | 1.232740  | 0.242626  |
| C | 3.568031  | 2.563501  | 0.470325  |
| C | 2.597436  | 3.745389  | 0.642015  |
| C | 4.458739  | 2.888966  | -0.748321 |
| C | 4.417917  | 2.491631  | 1.757327  |
| C | 3.578772  | -0.004899 | 0.070287  |
| H | 2.006855  | -3.628696 | -1.432456 |
| H | 1.964337  | -3.906503 | 0.316395  |
| H | 3.206273  | -4.669444 | -0.671469 |
| H | 4.968309  | -3.835978 | 0.777510  |
| H | 5.145943  | -2.113858 | 1.141586  |
| H | 3.778069  | -3.016942 | 1.794878  |
| H | 5.217645  | -1.700282 | -1.507708 |
| H | 5.019746  | -3.446005 | -1.712400 |
| H | 3.882242  | -2.329410 | -2.474755 |
| H | 0.925255  | -2.110761 | -0.321661 |
| H | -0.923580 | -2.114287 | 0.298341  |
| H | -1.961241 | -3.905044 | -0.355852 |
| H | -2.003954 | -3.643008 | 1.395426  |
| H | -3.202555 | -4.677825 | 0.625121  |
| H | -5.216293 | -1.717919 | 1.488029  |
| H | -5.016987 | -3.465253 | 1.677014  |
| H | -3.880377 | -2.354645 | 2.449379  |
| H | -5.144282 | -2.107581 | -1.164868 |
| H | -4.965254 | -3.832766 | -0.816317 |
| H | -3.775685 | -3.003639 | -1.826270 |
| H | -1.976339 | 3.891845  | 0.271745  |
| H | -1.947982 | 3.629804  | -1.479824 |
| H | -3.177411 | 4.663875  | -0.758671 |
| H | -4.947042 | 3.450193  | -1.883123 |
| H | -5.152745 | 1.702732  | -1.702341 |
| H | -3.779410 | 2.340303  | -2.608838 |
| H | -4.996492 | 3.817718  | 0.610244  |
| H | -3.848263 | 2.989322  | 1.667534  |
| H | -5.188414 | 2.092421  | 0.951297  |
| H | -0.911954 | 2.101735  | -0.339873 |
| H | 0.910277  | 2.099334  | 0.354478  |
| H | 3.173697  | 4.659409  | 0.796288  |
| H | 1.973214  | 3.895700  | -0.240990 |
| H | 1.945114  | 3.617926  | 1.508157  |
| H | 5.186757  | 2.105047  | -0.936680 |
| H | 4.993446  | 3.827052  | -0.580128 |
| H | 3.845892  | 3.007275  | -1.644842 |
| H | 4.944286  | 3.437052  | 1.909834  |
| H | 3.777530  | 2.319751  | 2.625517  |

|    |           |           |           |
|----|-----------|-----------|-----------|
| H  | 5.151374  | 1.691452  | 1.713334  |
| O  | -4.851450 | -0.007484 | -0.100407 |
| Li | -6.631085 | -0.008028 | -0.136437 |
| O  | 4.851448  | -0.004511 | 0.096061  |
| Li | 6.631084  | -0.003969 | 0.132101  |

*Doubly Reduced*

PBE/def2TZVP

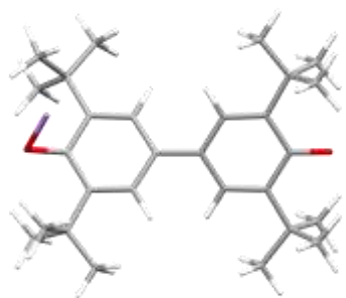

| <i>Element</i> | <i>X</i>  | <i>Y</i>  | <i>Z</i>  |
|----------------|-----------|-----------|-----------|
| C              | 2.686847  | -3.664756 | -0.959481 |
| C              | 3.621499  | -2.485602 | -0.642769 |
| C              | 4.514523  | -2.903649 | 0.547916  |
| C              | 4.507482  | -2.242581 | -1.885750 |
| C              | 2.858947  | -1.198322 | -0.288195 |
| C              | 1.469918  | -1.166674 | -0.279279 |
| C              | 0.721415  | -0.010094 | 0.020739  |
| C              | -0.747534 | -0.010335 | 0.021702  |
| C              | -1.498432 | -1.182067 | 0.271780  |
| C              | -2.888827 | -1.215511 | 0.346535  |
| C              | -3.639435 | -2.528322 | 0.634256  |
| C              | -2.699049 | -3.744598 | 0.672026  |
| C              | -4.352961 | -2.447302 | 2.003178  |
| C              | -4.685451 | -2.777140 | -0.475006 |
| C              | -3.629137 | 0.006050  | 0.171966  |
| C              | -2.893394 | 1.199809  | -0.179918 |
| C              | -3.651268 | 2.466476  | -0.669594 |
| C              | -2.687920 | 3.565745  | -1.148038 |
| C              | -4.561142 | 2.072037  | -1.852723 |
| C              | -4.537715 | 3.117307  | 0.427679  |
| C              | -1.489865 | 1.153323  | -0.236844 |
| C              | 1.455537  | 1.154284  | 0.326797  |
| C              | 2.843747  | 1.203035  | 0.343931  |
| C              | 3.589403  | 2.498066  | 0.705728  |
| C              | 2.639673  | 3.666762  | 1.017012  |
| C              | 4.485908  | 2.927526  | -0.478203 |
| C              | 4.469487  | 2.263571  | 1.954469  |
| C              | 3.621808  | 0.006779  | 0.029758  |

|    |           |           |           |
|----|-----------|-----------|-----------|
| O  | 4.902939  | 0.014517  | 0.035070  |
| H  | 2.039414  | -3.455992 | -1.825586 |
| H  | 2.041711  | -3.919261 | -0.103765 |
| H  | 3.292286  | -4.553914 | -1.199584 |
| H  | 5.201352  | -2.085262 | 0.798799  |
| H  | 3.893206  | -3.130864 | 1.428839  |
| H  | 5.096924  | -3.807108 | 0.294859  |
| H  | 5.195739  | -1.410143 | -1.691390 |
| H  | 5.088781  | -3.149442 | -2.128878 |
| H  | 3.881402  | -1.991785 | -2.756754 |
| H  | 0.919141  | -2.068935 | -0.553198 |
| H  | -0.938953 | -2.099590 | 0.453138  |
| H  | -2.148101 | -3.863902 | -0.272653 |
| H  | -1.964043 | -3.676217 | 1.487973  |
| H  | -3.294168 | -4.657131 | 0.834127  |
| H  | -5.095043 | -1.638385 | 1.995960  |
| H  | -4.869330 | -3.396535 | 2.224396  |
| H  | -3.621383 | -2.265543 | 2.806845  |
| H  | -5.390447 | -1.938288 | -0.531893 |
| H  | -5.245329 | -3.705172 | -0.270324 |
| H  | -4.187084 | -2.887411 | -1.450246 |
| H  | -2.033391 | 3.927454  | -0.340545 |
| H  | -2.048118 | 3.210155  | -1.966856 |
| H  | -3.270183 | 4.422795  | -1.521779 |
| H  | -5.262585 | 1.285344  | -1.544202 |
| H  | -3.947983 | 1.691812  | -2.682184 |
| H  | -5.130426 | 2.944410  | -2.216112 |
| H  | -4.940953 | 4.082520  | 0.084768  |
| H  | -3.947831 | 3.346626  | 1.338146  |
| H  | -5.418247 | 2.491750  | 0.659301  |
| H  | -0.934762 | 2.043760  | -0.528246 |
| H  | 0.890824  | 2.049007  | 0.598628  |
| H  | 3.233494  | 4.562769  | 1.260922  |
| H  | 1.997024  | 3.913511  | 0.157007  |
| H  | 1.989465  | 3.449975  | 1.879383  |
| H  | 5.182015  | 2.115816  | -0.725240 |
| H  | 5.057962  | 3.836228  | -0.220101 |
| H  | 3.868352  | 3.149380  | -1.363098 |
| H  | 5.040634  | 3.175742  | 2.202083  |
| H  | 3.840334  | 2.005548  | 2.821285  |
| H  | 5.166627  | 1.437713  | 1.763327  |
| O  | -4.940719 | 0.092523  | 0.437134  |
| Li | -4.294862 | 1.210886  | 1.645790  |

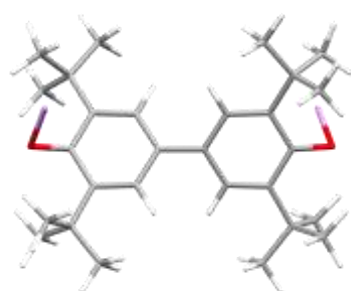

| <i>Element</i> | <i>X</i>  | <i>Y</i>  | <i>Z</i>  |
|----------------|-----------|-----------|-----------|
| C              | 2.639516  | -3.669586 | -0.961591 |
| C              | 3.596240  | -2.475250 | -0.807124 |
| C              | 4.611717  | -2.827974 | 0.302624  |
| C              | 4.339078  | -2.297751 | -2.151110 |
| C              | 2.854995  | -1.180814 | -0.431939 |
| C              | 1.466256  | -1.141448 | -0.356446 |
| C              | 0.738787  | 0.015148  | -0.015277 |
| C              | -0.738789 | 0.015158  | 0.015296  |
| C              | -1.466273 | -1.141427 | 0.356475  |
| C              | -2.855012 | -1.180774 | 0.431979  |
| C              | -3.596274 | -2.475205 | 0.807146  |
| C              | -2.639559 | -3.669548 | 0.961612  |
| C              | -4.339144 | -2.297728 | 2.151117  |
| C              | -4.611734 | -2.827903 | -0.302627 |
| C              | -3.598880 | 0.024423  | 0.161194  |
| C              | -2.874839 | 1.201095  | -0.272038 |
| C              | -3.638474 | 2.419067  | -0.859827 |
| C              | -2.678223 | 3.506457  | -1.371425 |
| C              | -4.497600 | 1.934946  | -2.048247 |
| C              | -4.575004 | 3.118080  | 0.163236  |
| C              | -1.472613 | 1.159065  | -0.314323 |
| C              | 1.472627  | 1.159050  | 0.314327  |
| C              | 2.874852  | 1.201060  | 0.272054  |
| C              | 3.638499  | 2.419043  | 0.859798  |
| C              | 2.678265  | 3.506479  | 1.371330  |
| C              | 4.575053  | 3.117982  | -0.163292 |
| C              | 4.497602  | 1.934964  | 2.048252  |
| C              | 3.598879  | 0.024369  | -0.161140 |
| H              | 1.921969  | -3.525635 | -1.783696 |
| H              | 2.072316  | -3.862604 | -0.038612 |
| H              | 3.224719  | -4.573334 | -1.188170 |
| H              | 5.332728  | -2.014051 | 0.443886  |
| H              | 4.090956  | -3.008162 | 1.255244  |
| H              | 5.159163  | -3.745973 | 0.035559  |
| H              | 5.106800  | -1.518638 | -2.066972 |

|    |           |           |           |
|----|-----------|-----------|-----------|
| H  | 4.832338  | -3.239453 | -2.440207 |
| H  | 3.631588  | -2.029597 | -2.951967 |
| H  | 0.899501  | -2.038295 | -0.606171 |
| H  | -0.899529 | -2.038280 | 0.606198  |
| H  | -2.072337 | -3.862553 | 0.038644  |
| H  | -1.922032 | -3.525615 | 1.783737  |
| H  | -3.224772 | -4.573298 | 1.188161  |
| H  | -5.106966 | -1.518719 | 2.066945  |
| H  | -4.832284 | -3.239481 | 2.440253  |
| H  | -3.631694 | -2.029452 | 2.951969  |
| H  | -5.332729 | -2.013966 | -0.443894 |
| H  | -5.159203 | -3.745893 | -0.035579 |
| H  | -4.090958 | -3.008093 | -1.255238 |
| H  | -2.055771 | 3.926399  | -0.566133 |
| H  | -2.011152 | 3.119047  | -2.153656 |
| H  | -3.261484 | 4.330261  | -1.809542 |
| H  | -5.198461 | 1.155727  | -1.722022 |
| H  | -3.850490 | 1.518552  | -2.833158 |
| H  | -5.068324 | 2.772081  | -2.481853 |
| H  | -4.959133 | 4.065031  | -0.243534 |
| H  | -4.032138 | 3.395076  | 1.089963  |
| H  | -5.470795 | 2.509039  | 0.377821  |
| H  | -0.918808 | 2.031876  | -0.659716 |
| H  | 0.918830  | 2.031876  | 0.659699  |
| H  | 3.261537  | 4.330293  | 1.809411  |
| H  | 2.055829  | 3.926392  | 0.566011  |
| H  | 2.011178  | 3.119123  | 2.153576  |
| H  | 5.470851  | 2.508926  | -0.377805 |
| H  | 4.959171  | 4.064965  | 0.243415  |
| H  | 4.032209  | 3.394905  | -1.090054 |
| H  | 5.068336  | 2.772111  | 2.481822  |
| H  | 3.850474  | 1.518624  | 2.833177  |
| H  | 5.198449  | 1.155715  | 1.722074  |
| O  | -4.905576 | 0.101321  | 0.375061  |
| Li | -4.437031 | 1.328533  | 1.548569  |
| O  | 4.905590  | 0.101230  | -0.374952 |
| Li | 4.437193  | 1.328356  | -1.548577 |

B3LYP/def2TZVP

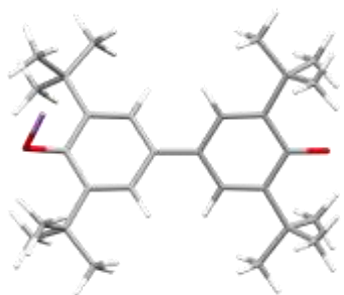

| <i>Element</i> | <i>X</i>  | <i>Y</i>  | <i>Z</i>  |
|----------------|-----------|-----------|-----------|
| C              | 2.677202  | -3.632520 | -1.062283 |
| C              | 3.611669  | -2.462784 | -0.712158 |
| C              | 4.500763  | -2.919531 | 0.465337  |
| C              | 4.497250  | -2.192800 | -1.948143 |
| C              | 2.848249  | -1.185913 | -0.324088 |
| C              | 1.465500  | -1.152126 | -0.314851 |
| C              | 0.722493  | -0.009247 | 0.015910  |
| C              | -0.748347 | -0.009303 | 0.016171  |
| C              | -1.492404 | -1.165936 | 0.309933  |
| C              | -2.876997 | -1.197617 | 0.379913  |
| C              | -3.629150 | -2.500118 | 0.707781  |
| C              | -2.687201 | -3.711771 | 0.801925  |
| C              | -4.357779 | -2.376984 | 2.063879  |
| C              | -4.659078 | -2.797705 | -0.402516 |
| C              | -3.610053 | 0.011655  | 0.157229  |
| C              | -2.882633 | 1.187210  | -0.226290 |
| C              | -3.639182 | 2.443775  | -0.736085 |
| C              | -2.678455 | 3.542039  | -1.220127 |
| C              | -4.539491 | 2.039863  | -1.921352 |
| C              | -4.529095 | 3.100199  | 0.351981  |
| C              | -1.484783 | 1.138324  | -0.280148 |
| C              | 1.452300  | 1.140352  | 0.353086  |
| C              | 2.834363  | 1.189121  | 0.372148  |
| C              | 3.581927  | 2.473057  | 0.767376  |
| C              | 2.633297  | 3.634193  | 1.108806  |
| C              | 4.477087  | 2.938631  | -0.402000 |
| C              | 4.458989  | 2.211797  | 2.011201  |
| C              | 3.606235  | 0.005409  | 0.026917  |
| O              | 4.878410  | 0.011808  | 0.033501  |
| H              | 2.035878  | -3.401037 | -1.916175 |
| H              | 2.036776  | -3.908317 | -0.220821 |
| H              | 3.276724  | -4.508950 | -1.324834 |
| H              | 5.191352  | -2.125429 | 0.740594  |
| H              | 3.881223  | -3.164245 | 1.332794  |
| H              | 5.070216  | -3.814946 | 0.190290  |
| H              | 5.189319  | -1.379615 | -1.740576 |

|    |           |           |           |
|----|-----------|-----------|-----------|
| H  | 5.065490  | -3.091175 | -2.215902 |
| H  | 3.875468  | -1.916442 | -2.804315 |
| H  | 0.915310  | -2.036211 | -0.608104 |
| H  | -0.934221 | -2.064185 | 0.526118  |
| H  | -2.130526 | -3.864230 | -0.124406 |
| H  | -1.967529 | -3.611091 | 1.616661  |
| H  | -3.276655 | -4.612767 | 0.990263  |
| H  | -5.114411 | -1.596021 | 2.019933  |
| H  | -4.849631 | -3.320760 | 2.319855  |
| H  | -3.643739 | -2.145584 | 2.859611  |
| H  | -5.365054 | -1.976179 | -0.502149 |
| H  | -5.210447 | -3.714888 | -0.171352 |
| H  | -4.150972 | -2.941253 | -1.359143 |
| H  | -2.035683 | 3.910106  | -0.417771 |
| H  | -2.038610 | 3.186111  | -2.027228 |
| H  | -3.256712 | 4.387566  | -1.601617 |
| H  | -5.240579 | 1.263760  | -1.619010 |
| H  | -3.924966 | 1.656472  | -2.737612 |
| H  | -5.100027 | 2.904080  | -2.293146 |
| H  | -4.923968 | 4.058887  | 0.008802  |
| H  | -3.946535 | 3.321826  | 1.258427  |
| H  | -5.404327 | 2.482958  | 0.578637  |
| H  | -0.932088 | 2.010830  | -0.591189 |
| H  | 0.889868  | 2.018117  | 0.643130  |
| H  | 3.222025  | 4.516896  | 1.374975  |
| H  | 1.996847  | 3.902078  | 0.261659  |
| H  | 1.987722  | 3.396961  | 1.958226  |
| H  | 5.176411  | 2.150170  | -0.671326 |
| H  | 5.036792  | 3.838651  | -0.121750 |
| H  | 3.863138  | 3.178077  | -1.274855 |
| H  | 5.017363  | 3.115006  | 2.283730  |
| H  | 3.832371  | 1.929668  | 2.862093  |
| H  | 5.159439  | 1.404378  | 1.809239  |
| O  | -4.920807 | 0.096054  | 0.399100  |
| Li | -4.363584 | 1.194772  | 1.630914  |

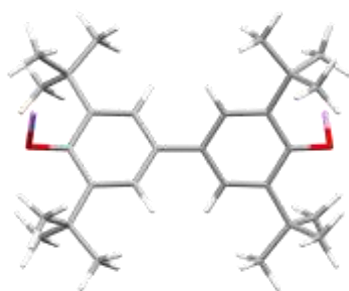

| <i>Element</i> | <i>X</i> | <i>Y</i> | <i>Z</i> |
|----------------|----------|----------|----------|
|----------------|----------|----------|----------|

|   |           |           |           |
|---|-----------|-----------|-----------|
| C | 2.624752  | -3.630232 | -1.092403 |
| C | 3.587807  | -2.457849 | -0.840306 |
| C | 4.547500  | -2.880656 | 0.292037  |
| C | 4.389228  | -2.240992 | -2.142918 |
| C | 2.846386  | -1.170245 | -0.438037 |
| C | 1.461141  | -1.129648 | -0.385183 |
| C | 0.739629  | 0.009344  | -0.011221 |
| C | -0.739627 | 0.009352  | 0.011205  |
| C | -1.461151 | -1.129624 | 0.385189  |
| C | -2.846397 | -1.170205 | 0.438041  |
| C | -3.587832 | -2.457794 | 0.840334  |
| C | -2.624789 | -3.630181 | 1.092463  |
| C | -4.389258 | -2.240903 | 2.142937  |
| C | -4.547523 | -2.880617 | -0.292005 |
| C | -3.583513 | 0.014250  | 0.107752  |
| C | -2.863557 | 1.178469  | -0.321877 |
| C | -3.623507 | 2.415535  | -0.855058 |
| C | -2.670085 | 3.543471  | -1.283616 |
| C | -4.461647 | 2.005396  | -2.083656 |
| C | -4.573914 | 3.031613  | 0.205218  |
| C | -1.469470 | 1.138807  | -0.348452 |
| C | 1.469485  | 1.138796  | 0.348415  |
| C | 2.863573  | 1.178444  | 0.321839  |
| C | 3.623536  | 2.415505  | 0.855014  |
| C | 2.670125  | 3.543449  | 1.283573  |
| C | 4.573946  | 3.031575  | -0.205263 |
| C | 4.461675  | 2.005361  | 2.083611  |
| C | 3.583516  | 0.014209  | -0.107775 |
| H | 1.946743  | -3.435355 | -1.926118 |
| H | 2.025022  | -3.859569 | -0.209670 |
| H | 3.202233  | -4.523411 | -1.339566 |
| H | 5.265314  | -2.092892 | 0.507103  |
| H | 3.984653  | -3.098867 | 1.202456  |
| H | 5.090808  | -3.786032 | 0.006662  |
| H | 5.186744  | -1.516733 | -1.987787 |
| H | 4.846756  | -3.178852 | -2.468908 |
| H | 3.731329  | -1.895315 | -2.945636 |
| H | 0.896147  | -2.004159 | -0.670494 |
| H | -0.896167 | -2.004135 | 0.670519  |
| H | -2.025057 | -3.859543 | 0.209737  |
| H | -1.946783 | -3.435291 | 1.926176  |
| H | -3.202280 | -4.523348 | 1.339643  |
| H | -5.186768 | -1.516641 | 1.987784  |
| H | -4.846796 | -3.178751 | 2.468944  |
| H | -3.731362 | -1.895212 | 2.945651  |
| H | -5.265326 | -2.092850 | -0.507096 |
| H | -5.090843 | -3.785980 | -0.006613 |
| H | -3.984671 | -3.098857 | -1.202415 |

|    |           |          |           |
|----|-----------|----------|-----------|
| H  | -2.069299 | 3.913119 | -0.449382 |
| H  | -1.993024 | 3.217830 | -2.073494 |
| H  | -3.250870 | 4.381460 | -1.674781 |
| H  | -5.150614 | 1.203128 | -1.826420 |
| H  | -3.804955 | 1.657377 | -2.882719 |
| H  | -5.033940 | 2.857806 | -2.461809 |
| H  | -4.915675 | 4.021907 | -0.101411 |
| H  | -4.056286 | 3.176166 | 1.164981  |
| H  | -5.480867 | 2.430659 | 0.318599  |
| H  | -0.916922 | 2.000817 | -0.690706 |
| H  | 0.916946  | 2.000818 | 0.690657  |
| H  | 3.250918  | 4.381433 | 1.674737  |
| H  | 2.069341  | 3.913103 | 0.449340  |
| H  | 1.993061  | 3.217814 | 2.073451  |
| H  | 5.480889  | 2.430607 | -0.318658 |
| H  | 4.915727  | 4.021860 | 0.101373  |
| H  | 4.056313  | 3.176148 | -1.165021 |
| H  | 5.033974  | 2.857766 | 2.461764  |
| H  | 3.804982  | 1.657346 | 2.882675  |
| H  | 5.150637  | 1.203088 | 1.826374  |
| O  | -4.900510 | 0.059605 | 0.242848  |
| Li | -4.744161 | 1.126565 | 1.585324  |
| O  | 4.900510  | 0.059554 | -0.242887 |
| Li | 4.744107  | 1.126531 | -1.585348 |

B3LYP/def2TZVP (CPCM – DME)

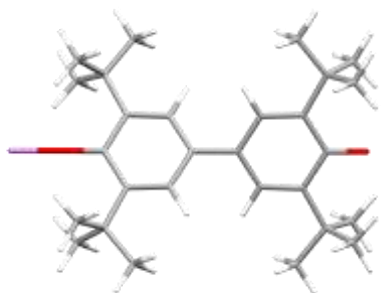

| <i>Element</i> | <i>X</i>  | <i>Y</i>  | <i>Z</i>  |
|----------------|-----------|-----------|-----------|
| C              | 2.640665  | -3.654018 | -1.027927 |
| C              | 3.600883  | -2.493620 | -0.716147 |
| C              | 4.497341  | -2.948610 | 0.455769  |
| C              | 4.468904  | -2.269696 | -1.972843 |
| C              | 2.868255  | -1.192568 | -0.340539 |
| C              | 1.480070  | -1.144162 | -0.316596 |
| C              | 0.749465  | 0.004037  | 0.014414  |
| C              | -0.731380 | 0.008986  | 0.031826  |
| C              | -1.469656 | -1.129187 | 0.371392  |
| C              | -2.861747 | -1.167230 | 0.390482  |

|   |           |           |           |
|---|-----------|-----------|-----------|
| C | -3.594829 | -2.470604 | 0.766645  |
| C | -2.630399 | -3.626545 | 1.088007  |
| C | -4.462977 | -2.255023 | 2.024328  |
| C | -4.472268 | -2.941930 | -0.412827 |
| C | -3.601064 | 0.018574  | 0.065560  |
| C | -2.861683 | 1.199441  | -0.276736 |
| C | -3.594681 | 2.507718  | -0.635649 |
| C | -2.630372 | 3.657220  | -0.979671 |
| C | -4.493578 | 2.298056  | -1.872559 |
| C | -4.440977 | 2.984788  | 0.564095  |
| C | -1.469813 | 1.152096  | -0.290375 |
| C | 1.495308  | 1.147301  | 0.328064  |
| C | 2.883964  | 1.186429  | 0.319355  |
| C | 3.633899  | 2.482526  | 0.677531  |
| C | 2.689053  | 3.649291  | 1.011707  |
| C | 4.505577  | 2.931605  | -0.515174 |
| C | 4.529711  | 2.252709  | 1.913489  |
| C | 3.638408  | -0.005617 | -0.019554 |
| O | 4.923300  | -0.009911 | -0.034661 |
| H | 1.991791  | -3.432233 | -1.878278 |
| H | 2.007290  | -3.901837 | -0.173072 |
| H | 3.221525  | -4.545270 | -1.279111 |
| H | 5.204015  | -2.163632 | 0.714872  |
| H | 3.886346  | -3.175579 | 1.333969  |
| H | 5.049983  | -3.854922 | 0.187091  |
| H | 5.176654  | -1.462012 | -1.801331 |
| H | 5.019638  | -3.181365 | -2.226907 |
| H | 3.838176  | -2.008970 | -2.827373 |
| H | 0.919057  | -2.028564 | -0.585668 |
| H | -0.916259 | -2.014329 | 0.647801  |
| H | -1.991407 | -3.874984 | 0.238387  |
| H | -1.988826 | -3.399802 | 1.941810  |
| H | -3.210209 | -4.518443 | 1.338033  |
| H | -5.174122 | -1.446809 | 1.874872  |
| H | -5.012245 | -3.168607 | 2.271853  |
| H | -3.831113 | -2.001314 | 2.879345  |
| H | -5.175528 | -2.168808 | -0.711353 |
| H | -5.031254 | -3.842097 | -0.139138 |
| H | -3.845460 | -3.185337 | -1.274527 |
| H | -1.969941 | 3.901312  | -0.145324 |
| H | -2.010573 | 3.426270  | -1.848302 |
| H | -3.209928 | 4.552992  | -1.216063 |
| H | -5.206395 | 1.494597  | -1.706372 |
| H | -3.883699 | 2.040211  | -2.742179 |
| H | -5.042400 | 3.215311  | -2.107162 |
| H | -5.000209 | 3.888701  | 0.303568  |
| H | -3.792470 | 3.223915  | 1.410806  |
| H | -5.142182 | 2.216360  | 0.879121  |

|    |           |          |           |
|----|-----------|----------|-----------|
| H  | -0.917165 | 2.033543 | -0.579784 |
| H  | 0.946699  | 2.035412 | 0.610182  |
| H  | 3.281601  | 4.536620 | 1.249101  |
| H  | 2.037429  | 3.901408 | 0.171958  |
| H  | 2.058878  | 3.431778 | 1.877093  |
| H  | 5.200699  | 2.141940 | -0.790760 |
| H  | 5.070430  | 3.834180 | -0.259636 |
| H  | 3.875633  | 3.162723 | -1.378784 |
| H  | 5.092347  | 3.160658 | 2.154461  |
| H  | 3.917520  | 1.996137 | 2.782632  |
| H  | 5.227819  | 1.440326 | 1.725448  |
| O  | -4.911057 | 0.022949 | 0.080958  |
| Li | -6.630718 | 0.028688 | 0.101177  |

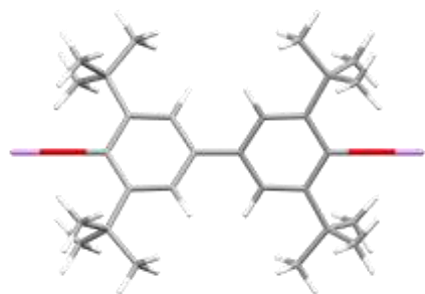

| <i>Element</i> | <i>X</i>  | <i>Y</i>  | <i>Z</i>  |
|----------------|-----------|-----------|-----------|
| C              | 2.607501  | -3.626811 | -1.108196 |
| C              | 3.580730  | -2.475373 | -0.797470 |
| C              | 4.471732  | -2.951949 | 0.369677  |
| C              | 4.432671  | -2.260066 | -2.066178 |
| C              | 2.856779  | -1.170924 | -0.409108 |
| C              | 1.466387  | -1.128170 | -0.369353 |
| C              | 0.740602  | 0.013412  | -0.018707 |
| C              | -0.740600 | 0.013400  | 0.018709  |
| C              | -1.466375 | -1.128289 | 0.369030  |
| C              | -2.856767 | -1.171068 | 0.408768  |
| C              | -3.580706 | -2.475634 | 0.796757  |
| C              | -2.607467 | -3.627150 | 1.107163  |
| C              | -4.432657 | -2.260693 | 2.065521  |
| C              | -4.471698 | -2.951888 | -0.370529 |
| C              | -3.604189 | 0.013377  | 0.091038  |
| C              | -2.873779 | 1.197834  | -0.264017 |
| C              | -3.616405 | 2.502388  | -0.614961 |
| C              | -2.660097 | 3.653922  | -0.974102 |
| C              | -4.531317 | 2.287433  | -1.839098 |
| C              | -4.447340 | 2.978624  | 0.595818  |
| C              | -1.483154 | 1.155077  | -0.294523 |
| C              | 1.483145  | 1.155007  | 0.294848  |

|    |           |           |           |
|----|-----------|-----------|-----------|
| C  | 2.873770  | 1.197787  | 0.264349  |
| C  | 3.616382  | 2.502250  | 0.615660  |
| C  | 2.660061  | 3.653670  | 0.975130  |
| C  | 4.447306  | 2.978841  | -0.594987 |
| C  | 4.531304  | 2.286961  | 1.839730  |
| C  | 3.604191  | 0.013438  | -0.091046 |
| H  | 1.955353  | -3.395791 | -1.952896 |
| H  | 1.979646  | -3.875374 | -0.250238 |
| H  | 3.180360  | -4.520085 | -1.368246 |
| H  | 5.182896  | -2.183191 | 0.660265  |
| H  | 3.855706  | -3.194073 | 1.239435  |
| H  | 5.022733  | -3.853924 | 0.086792  |
| H  | 5.150343  | -1.456336 | -1.924852 |
| H  | 4.973728  | -3.175663 | -2.323181 |
| H  | 3.790815  | -2.000903 | -2.912025 |
| H  | 0.905572  | -2.010899 | -0.638588 |
| H  | -0.905551 | -2.011088 | 0.638016  |
| H  | -1.979607 | -3.875466 | 0.249137  |
| H  | -1.955325 | -3.396361 | 1.951930  |
| H  | -3.180319 | -4.520503 | 1.366960  |
| H  | -5.150338 | -1.456933 | 1.924416  |
| H  | -4.973705 | -3.176369 | 2.322264  |
| H  | -3.790809 | -2.001760 | 2.911444  |
| H  | -5.182869 | -2.183055 | -0.660901 |
| H  | -5.022690 | -3.853950 | -0.087903 |
| H  | -3.855665 | -3.193758 | -1.240354 |
| H  | -1.989723 | 3.902245  | -0.148868 |
| H  | -2.051432 | 3.423146  | -1.850717 |
| H  | -3.245350 | 4.547265  | -1.204642 |
| H  | -5.240945 | 1.483659  | -1.661944 |
| H  | -3.932987 | 2.028513  | -2.716346 |
| H  | -5.084653 | 3.203099  | -2.068198 |
| H  | -5.011930 | 3.880664  | 0.341365  |
| H  | -3.788182 | 3.220525  | 1.433427  |
| H  | -5.142916 | 2.209769  | 0.921734  |
| H  | -0.936639 | 2.037885  | -0.591480 |
| H  | 0.936623  | 2.037726  | 0.592055  |
| H  | 3.245303  | 4.546956  | 1.205920  |
| H  | 1.989680  | 3.902217  | 0.149969  |
| H  | 2.051403  | 3.422639  | 1.851683  |
| H  | 5.142926  | 2.210106  | -0.921092 |
| H  | 5.011844  | 3.880847  | -0.340296 |
| H  | 3.788147  | 3.220919  | -1.432544 |
| H  | 5.084634  | 3.202567  | 2.069083  |
| H  | 3.932982  | 2.027791  | 2.716910  |
| H  | 5.240937  | 1.483242  | 1.662347  |
| O  | -4.910003 | 0.013366  | 0.124020  |
| Li | -6.634711 | 0.013361  | 0.167581  |

|    |          |          |           |
|----|----------|----------|-----------|
| O  | 4.910004 | 0.013451 | -0.124035 |
| Li | 6.634712 | 0.013459 | -0.167615 |

## Sodium

*Singly Reduced*

PBE/def2TZVP

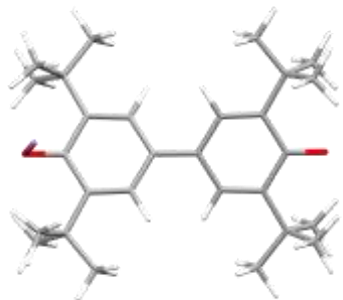

| <i>Element</i> | <i>X</i>  | <i>Y</i>  | <i>Z</i>  |
|----------------|-----------|-----------|-----------|
| C              | 4.219373  | -1.978801 | -1.481562 |
| C              | 3.739145  | -0.520918 | -1.269151 |
| C              | 4.388318  | -0.020536 | 0.032289  |
| C              | 4.260007  | 0.356123  | -2.429320 |
| C              | 2.201317  | -0.449741 | -1.220104 |
| C              | 1.546528  | 0.022947  | -0.092413 |
| C              | 0.138811  | 0.112262  | 0.012129  |
| C              | -0.508377 | 0.586434  | 1.225687  |
| C              | -1.872424 | 0.293375  | 1.496111  |
| C              | -2.523464 | 0.705999  | 2.636854  |
| C              | -3.991131 | 0.349283  | 2.896723  |
| C              | -4.108480 | -0.481397 | 4.195934  |
| C              | -4.826706 | 1.644516  | 3.028246  |
| C              | -4.598152 | -0.482178 | 1.754012  |
| C              | -1.782816 | 1.502231  | 3.634633  |
| O              | -2.339387 | 1.897756  | 4.692684  |
| C              | -0.369461 | 1.820029  | 3.352786  |
| C              | 0.426995  | 2.664659  | 4.353280  |
| C              | 0.483640  | 1.939928  | 5.718792  |
| C              | 1.874672  | 2.901316  | 3.890683  |
| C              | -0.243944 | 4.047586  | 4.524175  |
| C              | 0.199577  | 1.355222  | 2.188500  |
| C              | -0.607801 | -0.288290 | -1.120475 |
| C              | -0.029451 | -0.763332 | -2.288417 |
| C              | -0.897935 | -1.143108 | -3.502864 |
| C              | -0.707378 | -2.636311 | -3.871415 |
| C              | -2.398291 | -0.936945 | -3.234378 |
| C              | -0.505124 | -0.270692 | -4.715424 |

|    |           |           |           |
|----|-----------|-----------|-----------|
| C  | 1.418114  | -0.880639 | -2.366757 |
| H  | 5.311815  | -2.049682 | -1.367165 |
| H  | 3.978308  | -2.315046 | -2.500901 |
| H  | 3.778063  | -2.649912 | -0.720781 |
| H  | 5.482864  | -0.066748 | -0.067015 |
| H  | 4.105956  | -0.631956 | 0.903101  |
| H  | 4.120449  | 1.024374  | 0.245117  |
| H  | 3.988794  | 1.408109  | -2.259262 |
| H  | 3.829567  | 0.032957  | -3.384793 |
| H  | 5.358101  | 0.294293  | -2.492063 |
| H  | 2.138124  | 0.308840  | 0.775157  |
| H  | -2.411751 | -0.320731 | 0.776444  |
| H  | -3.733555 | 0.083927  | 5.056297  |
| H  | -3.534683 | -1.417014 | 4.110031  |
| H  | -5.162904 | -0.744400 | 4.375484  |
| H  | -4.766766 | 2.239103  | 2.103870  |
| H  | -5.884114 | 1.388675  | 3.200375  |
| H  | -4.469613 | 2.256236  | 3.864040  |
| H  | -4.581350 | 0.058067  | 0.794836  |
| H  | -5.649283 | -0.703971 | 1.990233  |
| H  | -4.078994 | -1.443997 | 1.620940  |
| H  | 1.067830  | 2.540420  | 6.433852  |
| H  | -0.523477 | 1.788637  | 6.122753  |
| H  | 0.975036  | 0.960099  | 5.616814  |
| H  | 2.432606  | 1.958733  | 3.778193  |
| H  | 2.398221  | 3.506969  | 4.644951  |
| H  | 1.920748  | 3.448836  | 2.936811  |
| H  | 0.336431  | 4.656968  | 5.234727  |
| H  | -0.275444 | 4.583630  | 3.563346  |
| H  | -1.266836 | 3.941686  | 4.902292  |
| H  | 1.232855  | 1.618043  | 1.967609  |
| H  | -1.690039 | -0.182144 | -1.077171 |
| H  | -1.433935 | -2.943638 | -4.639014 |
| H  | 0.296170  | -2.799985 | -4.291307 |
| H  | -0.887032 | -3.282106 | -2.991095 |
| H  | -2.765687 | -1.565412 | -2.408437 |
| H  | -2.629261 | 0.111353  | -2.997024 |
| H  | -2.968547 | -1.204242 | -4.136277 |
| H  | 0.559228  | -0.389564 | -4.951675 |
| H  | -1.101053 | -0.551793 | -5.598240 |
| H  | -0.700806 | 0.789209  | -4.497652 |
| O  | 1.991957  | -1.420808 | -3.406867 |
| Na | 1.779315  | -3.355742 | -2.452504 |

B3LYP/def2TZVP

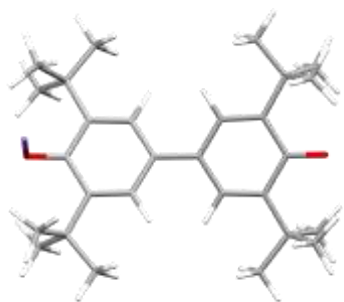

| <i>Element</i> | <i>X</i>  | <i>Y</i>  | <i>Z</i>  |
|----------------|-----------|-----------|-----------|
| C              | 4.211078  | -2.014523 | -1.451252 |
| C              | 3.726931  | -0.558594 | -1.247774 |
| C              | 4.378698  | -0.053183 | 0.050124  |
| C              | 4.250277  | 0.314151  | -2.407814 |
| C              | 2.189210  | -0.482918 | -1.197266 |
| C              | 1.538595  | -0.006735 | -0.076705 |
| C              | 0.138362  | 0.098838  | 0.021721  |
| C              | -0.508005 | 0.576479  | 1.231991  |
| C              | -1.863201 | 0.269654  | 1.510774  |
| C              | -2.512712 | 0.684009  | 2.641317  |
| C              | -3.974559 | 0.313375  | 2.915284  |
| C              | -4.076426 | -0.503368 | 4.222542  |
| C              | -4.827299 | 1.596567  | 3.032452  |
| C              | -4.577165 | -0.540289 | 1.787311  |
| C              | -1.777924 | 1.498829  | 3.622692  |
| O              | -2.330533 | 1.896665  | 4.667792  |
| C              | -0.372760 | 1.830481  | 3.335560  |
| C              | 0.413637  | 2.696117  | 4.326332  |
| C              | 0.485007  | 1.989177  | 5.698434  |
| C              | 1.857142  | 2.945404  | 3.858935  |
| C              | -0.269805 | 4.072697  | 4.482173  |
| C              | 0.192158  | 1.362290  | 2.180871  |
| C              | -0.604266 | -0.280049 | -1.112662 |
| C              | -0.029586 | -0.756040 | -2.274062 |
| C              | -0.893527 | -1.098165 | -3.502977 |
| C              | -0.749059 | -2.589825 | -3.890747 |
| C              | -2.390235 | -0.851093 | -3.250464 |
| C              | -0.465941 | -0.222799 | -4.699364 |
| C              | 1.406653  | -0.906649 | -2.335625 |
| H              | 5.293288  | -2.083673 | -1.321346 |
| H              | 3.989944  | -2.350765 | -2.464887 |
| H              | 3.757015  | -2.681077 | -0.707525 |
| H              | 5.464937  | -0.095954 | -0.049934 |
| H              | 4.101817  | -0.659998 | 0.915172  |
| H              | 4.110449  | 0.983263  | 0.259463  |
| H              | 3.985508  | 1.359703  | -2.239547 |

|    |           |           |           |
|----|-----------|-----------|-----------|
| H  | 3.823192  | -0.003705 | -3.356178 |
| H  | 5.340109  | 0.248372  | -2.470608 |
| H  | 2.122946  | 0.269942  | 0.785705  |
| H  | -2.388120 | -0.353425 | 0.804363  |
| H  | -3.715974 | 0.069962  | 5.072201  |
| H  | -3.490057 | -1.422475 | 4.146349  |
| H  | -5.117729 | -0.782185 | 4.404244  |
| H  | -4.775684 | 2.176302  | 2.107657  |
| H  | -5.873375 | 1.330420  | 3.205461  |
| H  | -4.485700 | 2.220400  | 3.853757  |
| H  | -4.571851 | -0.015879 | 0.829121  |
| H  | -5.616173 | -0.771279 | 2.029207  |
| H  | -4.049833 | -1.489161 | 1.665143  |
| H  | 1.065091  | 2.597488  | 6.397336  |
| H  | -0.507740 | 1.834047  | 6.111801  |
| H  | 0.980636  | 1.019725  | 5.604399  |
| H  | 2.421016  | 2.015375  | 3.756674  |
| H  | 2.371638  | 3.561025  | 4.598984  |
| H  | 1.893684  | 3.478298  | 2.906292  |
| H  | 0.305050  | 4.694439  | 5.173478  |
| H  | -0.312864 | 4.589733  | 3.520524  |
| H  | -1.280632 | 3.967532  | 4.866601  |
| H  | 1.211190  | 1.629421  | 1.951495  |
| H  | -1.674052 | -0.153883 | -1.074480 |
| H  | -1.484326 | -2.864538 | -4.650154 |
| H  | 0.236290  | -2.777708 | -4.318662 |
| H  | -0.931729 | -3.235356 | -3.022429 |
| H  | -2.782464 | -1.478943 | -2.447135 |
| H  | -2.590885 | 0.191122  | -2.998882 |
| H  | -2.953229 | -1.082958 | -4.156590 |
| H  | 0.588604  | -0.363096 | -4.925736 |
| H  | -1.054627 | -0.476389 | -5.585426 |
| H  | -0.636277 | 0.831270  | -4.472528 |
| O  | 1.974570  | -1.452837 | -3.367735 |
| Na | 1.845087  | -3.446006 | -2.655975 |

B3LYP/def2TZVP (CPCM – DME)

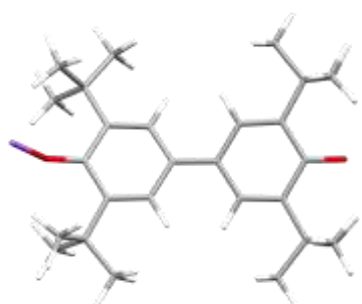

| <i>Element</i> | <i>X</i>  | <i>Y</i>  | <i>Z</i>  |
|----------------|-----------|-----------|-----------|
| C              | 4.340204  | -1.833626 | -1.353951 |
| C              | 3.725819  | -0.419865 | -1.290191 |
| C              | 4.362254  | 0.292370  | -0.083569 |
| C              | 4.128938  | 0.368900  | -2.554802 |
| C              | 2.189858  | -0.469952 | -1.190810 |
| C              | 1.542551  | 0.034026  | -0.086897 |
| C              | 0.135202  | 0.078273  | 0.045389  |
| C              | -0.507307 | 0.559345  | 1.247243  |
| C              | -1.880802 | 0.310370  | 1.503072  |
| C              | -2.533711 | 0.734391  | 2.629654  |
| C              | -4.018583 | 0.417087  | 2.858630  |
| C              | -4.190480 | -0.414014 | 4.148901  |
| C              | -4.825736 | 1.729355  | 2.969855  |
| C              | -4.626455 | -0.397403 | 1.704366  |
| C              | -1.791431 | 1.499911  | 3.638918  |
| O              | -2.352995 | 1.912477  | 4.683352  |
| C              | -0.369776 | 1.765874  | 3.385252  |
| C              | 0.445312  | 2.571108  | 4.407611  |
| C              | 0.456674  | 1.837277  | 5.766770  |
| C              | 1.909704  | 2.753298  | 3.974333  |
| C              | -0.162775 | 3.980481  | 4.577913  |
| C              | 0.200853  | 1.294008  | 2.233341  |
| C              | -0.610946 | -0.348481 | -1.078439 |
| C              | -0.043513 | -0.857568 | -2.222548 |
| C              | -0.915594 | -1.207988 | -3.442330 |
| C              | -0.868239 | -2.718708 | -3.750921 |
| C              | -2.393842 | -0.840138 | -3.224675 |
| C              | -0.421682 | -0.418174 | -4.673351 |
| C              | 1.399175  | -1.039532 | -2.270478 |
| H              | 5.428161  | -1.775130 | -1.268999 |
| H              | 4.107647  | -2.309408 | -2.302162 |
| H              | 3.970315  | -2.460273 | -0.539410 |
| H              | 5.442654  | 0.347849  | -0.229744 |
| H              | 4.184246  | -0.244224 | 0.850794  |
| H              | 3.991676  | 1.312726  | 0.030671  |
| H              | 3.766904  | 1.397830  | -2.494691 |
| H              | 3.716518  | -0.092757 | -3.449330 |
| H              | 5.217907  | 0.399809  | -2.647875 |
| H              | 2.135574  | 0.394004  | 0.737221  |
| H              | -2.424561 | -0.273563 | 0.778546  |
| H              | -3.821677 | 0.128153  | 5.015628  |
| H              | -3.646360 | -1.358553 | 4.069757  |
| H              | -5.247428 | -0.646762 | 4.303739  |
| H              | -4.736157 | 2.311464  | 2.049270  |
| H              | -5.884330 | 1.503167  | 3.123270  |
| H              | -4.473816 | 2.335708  | 3.800225  |
| H              | -4.576262 | 0.138140  | 0.753912  |

|    |           |           |           |
|----|-----------|-----------|-----------|
| H  | -5.679439 | -0.590103 | 1.918786  |
| H  | -4.133250 | -1.363947 | 1.580772  |
| H  | 1.043919  | 2.406658  | 6.492193  |
| H  | -0.551517 | 1.713535  | 6.153033  |
| H  | 0.914921  | 0.850460  | 5.663568  |
| H  | 2.425922  | 1.797398  | 3.862320  |
| H  | 2.439443  | 3.326348  | 4.737795  |
| H  | 1.993901  | 3.301597  | 3.033636  |
| H  | 0.423562  | 4.554122  | 5.300695  |
| H  | -0.146364 | 4.520141  | 3.627718  |
| H  | -1.190198 | 3.924209  | 4.927701  |
| H  | 1.238584  | 1.513807  | 2.043811  |
| H  | -1.681340 | -0.231725 | -1.040612 |
| H  | -1.591793 | -2.966074 | -4.531882 |
| H  | 0.116833  | -3.006019 | -4.105558 |
| H  | -1.112528 | -3.307607 | -2.864036 |
| H  | -2.844058 | -1.412096 | -2.410582 |
| H  | -2.523252 | 0.222385  | -3.010372 |
| H  | -2.955635 | -1.064702 | -4.133375 |
| H  | 0.618833  | -0.647617 | -4.892067 |
| H  | -1.026414 | -0.669533 | -5.548862 |
| H  | -0.512546 | 0.656474  | -4.498956 |
| O  | 1.953410  | -1.678034 | -3.229358 |
| Na | 2.458801  | -3.823908 | -3.389561 |

*Doubly Reduced*

PBE/def2TZVP

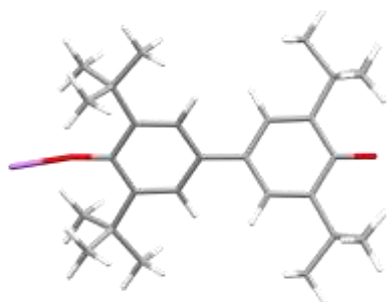

| <i>Element</i> | <i>X</i>  | <i>Y</i>  | <i>Z</i>  |
|----------------|-----------|-----------|-----------|
| C              | 1.961802  | -0.873133 | -4.808100 |
| C              | 1.205314  | -1.846943 | -3.875829 |
| C              | 2.253955  | -2.616443 | -3.055329 |
| C              | 0.431292  | -2.878038 | -4.729244 |
| C              | 0.221040  | -1.064266 | -2.992915 |
| C              | 0.324564  | -1.083552 | -1.610587 |
| C              | -0.544077 | -0.370989 | -0.753556 |

|    |           |           |           |
|----|-----------|-----------|-----------|
| C  | -0.394893 | -0.416371 | 0.704956  |
| C  | -0.867816 | 0.619851  | 1.534446  |
| C  | -0.745295 | 0.612776  | 2.921564  |
| C  | -1.275373 | 1.798955  | 3.750725  |
| C  | -1.969685 | 2.868338  | 2.887763  |
| C  | -0.100286 | 2.498711  | 4.467129  |
| C  | -2.320120 | 1.309422  | 4.779478  |
| C  | -0.105100 | -0.505138 | 3.574279  |
| O  | 0.000020  | -0.559377 | 4.882487  |
| Na | 0.827253  | -0.272465 | 6.760438  |
| C  | 0.391969  | -1.573598 | 2.739247  |
| C  | 1.086885  | -2.796031 | 3.370826  |
| C  | 0.142825  | -3.494960 | 4.375189  |
| C  | 2.384362  | -2.344663 | 4.075705  |
| C  | 1.493667  | -3.854978 | 2.329961  |
| C  | 0.230349  | -1.497162 | 1.358386  |
| C  | -1.562025 | 0.389220  | -1.372248 |
| C  | -1.736712 | 0.459618  | -2.745723 |
| C  | -2.873630 | 1.289509  | -3.361934 |
| C  | -2.280637 | 2.379798  | -4.284043 |
| C  | -3.805652 | 0.371668  | -4.185630 |
| C  | -3.733535 | 1.995884  | -2.300529 |
| C  | -0.834548 | -0.276946 | -3.632377 |
| O  | -0.962398 | -0.235310 | -4.902608 |
| H  | 1.247825  | -0.316376 | -5.427420 |
| H  | 2.654577  | -1.430164 | -5.462278 |
| H  | 2.551687  | -0.156970 | -4.214664 |
| H  | 2.923392  | -3.159585 | -3.741472 |
| H  | 2.875005  | -1.942832 | -2.444695 |
| H  | 1.789785  | -3.356121 | -2.384530 |
| H  | -0.317473 | -2.366591 | -5.346450 |
| H  | -0.080404 | -3.604935 | -4.079007 |
| H  | 1.126637  | -3.431934 | -5.383384 |
| H  | 1.135891  | -1.647036 | -1.147959 |
| H  | -1.328451 | 1.479040  | 1.048461  |
| H  | -2.333500 | 3.678927  | 3.539341  |
| H  | -1.285532 | 3.313736  | 2.150448  |
| H  | -2.835203 | 2.458090  | 2.346609  |
| H  | 0.474581  | 1.780781  | 5.068179  |
| H  | 0.585133  | 2.941614  | 3.728954  |
| H  | -0.463800 | 3.304146  | 5.127330  |
| H  | -2.665195 | 2.148925  | 5.407268  |
| H  | -1.897213 | 0.523474  | 5.416401  |
| H  | -3.194763 | 0.890252  | 4.259025  |
| H  | 0.656909  | -4.340901 | 4.862966  |
| H  | -0.741098 | -3.889095 | 3.850836  |

|   |           |           |           |
|---|-----------|-----------|-----------|
| H | -0.203777 | -2.787115 | 5.137604  |
| H | 2.176593  | -1.550204 | 4.805725  |
| H | 2.864010  | -3.189824 | 4.597490  |
| H | 3.097729  | -1.945221 | 3.339150  |
| H | 0.622344  | -4.253089 | 1.789146  |
| H | 2.202563  | -3.455786 | 1.589432  |
| H | 1.984304  | -4.697332 | 2.843487  |
| H | 0.570691  | -2.326258 | 0.739340  |
| H | -2.261502 | 0.915838  | -0.721749 |
| H | -1.672971 | 1.915477  | -5.070392 |
| H | -1.645601 | 3.067270  | -3.703383 |
| H | -3.089942 | 2.969223  | -4.748610 |
| H | -3.232321 | -0.137692 | -4.969955 |
| H | -4.612636 | 0.963856  | -4.650651 |
| H | -4.268240 | -0.386447 | -3.534283 |
| H | -4.223112 | 1.279255  | -1.623025 |
| H | -4.524051 | 2.576398  | -2.802554 |
| H | -3.141197 | 2.694745  | -1.689552 |

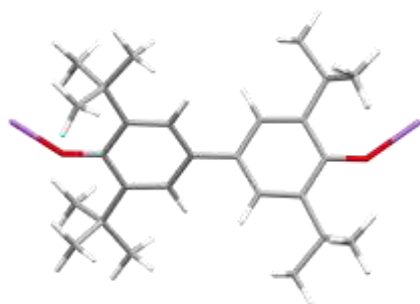

| <i>Element</i> | <i>X</i>  | <i>Y</i>  | <i>Z</i>  |
|----------------|-----------|-----------|-----------|
| C              | 2.015071  | -0.702720 | -4.821103 |
| C              | 1.317288  | -1.718786 | -3.889507 |
| C              | 2.414759  | -2.406056 | -3.058784 |
| C              | 0.626822  | -2.815621 | -4.731063 |
| C              | 0.274737  | -0.999916 | -3.013437 |
| C              | 0.385673  | -1.009637 | -1.622902 |
| C              | -0.528054 | -0.372758 | -0.766316 |
| C              | -0.370758 | -0.416463 | 0.702621  |
| C              | -0.759530 | 0.656187  | 1.516505  |
| C              | -0.623679 | 0.638171  | 2.906401  |
| C              | -1.059946 | 1.850287  | 3.748086  |
| C              | -1.645535 | 3.001860  | 2.911783  |
| C              | 0.171887  | 2.437022  | 4.487988  |
| C              | -2.181672 | 1.418678  | 4.730171  |
| C              | -0.055178 | -0.514613 | 3.558249  |
| O              | 0.092145  | -0.559531 | 4.869466  |

|    |           |           |           |
|----|-----------|-----------|-----------|
| Na | -0.176945 | 0.514900  | 6.596065  |
| C  | 0.350347  | -1.620041 | 2.732092  |
| C  | 0.956808  | -2.882216 | 3.372645  |
| C  | -0.057432 | -3.518111 | 4.349434  |
| C  | 2.254024  | -2.514305 | 4.127547  |
| C  | 1.324226  | -3.954784 | 2.332701  |
| C  | 0.177724  | -1.536212 | 1.350368  |
| C  | -1.595370 | 0.303868  | -1.372236 |
| C  | -1.764519 | 0.361884  | -2.757377 |
| C  | -2.962135 | 1.112644  | -3.365704 |
| C  | -2.443961 | 2.269336  | -4.261592 |
| C  | -3.851975 | 0.115052  | -4.154449 |
| C  | -3.878049 | 1.764912  | -2.314950 |
| C  | -0.822819 | -0.299619 | -3.624918 |
| O  | -0.958773 | -0.268370 | -4.937758 |
| Na | -2.156083 | 0.419114  | -6.454917 |
| H  | 1.276151  | -0.186587 | -5.446232 |
| H  | 2.743475  | -1.215136 | -5.471407 |
| H  | 2.557408  | 0.049279  | -4.227833 |
| H  | 3.123349  | -2.905358 | -3.737739 |
| H  | 2.984762  | -1.686240 | -2.452384 |
| H  | 2.002164  | -3.171914 | -2.384865 |
| H  | -0.165182 | -2.379680 | -5.352175 |
| H  | 0.177243  | -3.575225 | -4.073447 |
| H  | 1.360878  | -3.318765 | -5.382248 |
| H  | 1.235382  | -1.513733 | -1.162244 |
| H  | -1.156794 | 1.546210  | 1.026476  |
| H  | -1.940845 | 3.829479  | 3.577059  |
| H  | -0.913498 | 3.394739  | 2.191925  |
| H  | -2.538136 | 2.684291  | 2.353931  |
| H  | 0.835405  | 1.642792  | 4.863458  |
| H  | 0.782967  | 3.024436  | 3.787909  |
| H  | -0.127418 | 3.122526  | 5.303988  |
| H  | -2.341215 | 2.171386  | 5.525854  |
| H  | -1.983368 | 0.425288  | 5.161117  |
| H  | -3.133861 | 1.321128  | 4.189267  |
| H  | 0.380628  | -4.407025 | 4.833142  |
| H  | -0.961676 | -3.835332 | 3.807848  |
| H  | -0.349264 | -2.795958 | 5.121774  |
| H  | 2.049927  | -1.753589 | 4.890928  |
| H  | 2.682079  | -3.407264 | 4.612753  |
| H  | 3.003201  | -2.114616 | 3.427146  |
| H  | 0.444638  | -4.302676 | 1.770514  |
| H  | 2.070653  | -3.589971 | 1.611107  |
| H  | 1.756544  | -4.826117 | 2.848707  |
| H  | 0.456029  | -2.387258 | 0.728603  |

|   |           |           |           |
|---|-----------|-----------|-----------|
| H | -2.331797 | 0.775809  | -0.720289 |
| H | -1.562362 | 1.965487  | -4.846676 |
| H | -2.107018 | 3.105935  | -3.632841 |
| H | -3.240248 | 2.664883  | -4.920838 |
| H | -3.245800 | -0.616013 | -4.711342 |
| H | -4.558866 | 0.638280  | -4.826677 |
| H | -4.458616 | -0.477669 | -3.454985 |
| H | -4.315529 | 1.018145  | -1.637176 |
| H | -4.706743 | 2.287652  | -2.819690 |
| H | -3.335665 | 2.503209  | -1.707066 |

B3LYP/def2TZVP

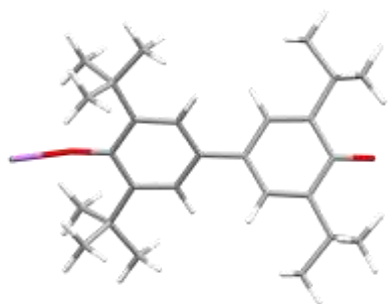

| <i>Element</i> | <i>X</i>  | <i>Y</i>  | <i>Z</i>  |
|----------------|-----------|-----------|-----------|
| C              | 1.977533  | -0.791981 | -4.798329 |
| C              | 1.243623  | -1.785311 | -3.871081 |
| C              | 2.313108  | -2.528970 | -3.054005 |
| C              | 0.503934  | -2.836824 | -4.727382 |
| C              | 0.238094  | -1.033089 | -2.985449 |
| C              | 0.339865  | -1.051837 | -1.608647 |
| C              | -0.544688 | -0.370511 | -0.754750 |
| C              | -0.394989 | -0.415510 | 0.705337  |
| C              | -0.832715 | 0.631753  | 1.527429  |
| C              | -0.709337 | 0.624901  | 2.909979  |
| C              | -1.206067 | 1.825164  | 3.739357  |
| C              | -1.872947 | 2.912370  | 2.877568  |
| C              | -0.015935 | 2.497616  | 4.454267  |
| C              | -2.263839 | 1.368247  | 4.767737  |
| C              | -0.100418 | -0.500493 | 3.556775  |
| O              | 0.018631  | -0.546837 | 4.862704  |
| Na             | 0.795745  | -0.305646 | 6.719903  |
| C              | 0.358912  | -1.581286 | 2.734007  |
| C              | 1.020114  | -2.819031 | 3.371588  |
| C              | 0.059753  | -3.489457 | 4.377773  |
| C              | 2.330794  | -2.405957 | 4.072736  |
| C              | 1.396408  | -3.894793 | 2.336992  |
| C              | 0.194573  | -1.506996 | 1.357902  |
| C              | -1.577970 | 0.357838  | -1.369376 |

|   |           |           |           |
|---|-----------|-----------|-----------|
| C | -1.753320 | 0.427874  | -2.737083 |
| C | -2.911900 | 1.226954  | -3.353932 |
| C | -2.353220 | 2.337774  | -4.270498 |
| C | -3.820356 | 0.289150  | -4.178740 |
| C | -3.793674 | 1.907128  | -2.293655 |
| C | -0.833854 | -0.277320 | -3.620671 |
| O | -0.960591 | -0.235714 | -4.882690 |
| H | 1.261433  | -0.255482 | -5.416534 |
| H | 2.683453  | -1.324854 | -5.445361 |
| H | 2.541665  | -0.067540 | -4.204518 |
| H | 2.993174  | -3.047416 | -3.735750 |
| H | 2.910157  | -1.845782 | -2.445371 |
| H | 1.872107  | -3.277686 | -2.391646 |
| H | -0.252786 | -2.355537 | -5.342567 |
| H | 0.016717  | -3.573643 | -4.082867 |
| H | 1.211512  | -3.366569 | -5.375184 |
| H | 1.157357  | -1.588432 | -1.148309 |
| H | -1.264384 | 1.492599  | 1.040743  |
| H | -2.211878 | 3.727478  | 3.523116  |
| H | -1.183597 | 3.334916  | 2.144692  |
| H | -2.742652 | 2.527483  | 2.342309  |
| H | 0.536688  | 1.776299  | 5.054469  |
| H | 0.676098  | 2.916382  | 3.720437  |
| H | -0.357664 | 3.310237  | 5.103911  |
| H | -2.585463 | 2.212515  | 5.387545  |
| H | -1.872245 | 0.579543  | 5.404914  |
| H | -3.142230 | 0.975198  | 4.250559  |
| H | 0.545993  | -4.344016 | 4.861076  |
| H | -0.828915 | -3.855813 | 3.858530  |
| H | -0.265532 | -2.781913 | 5.136133  |
| H | 2.152829  | -1.610622 | 4.795027  |
| H | 2.783287  | -3.258422 | 4.590059  |
| H | 3.048711  | -2.032799 | 3.339096  |
| H | 0.520514  | -4.268134 | 1.803612  |
| H | 2.109096  | -3.521885 | 1.599473  |
| H | 1.860865  | -4.741896 | 2.849551  |
| H | 0.504916  | -2.338294 | 0.744075  |
| H | -2.284045 | 0.857974  | -0.721744 |
| H | -1.736807 | 1.903730  | -5.054320 |
| H | -1.743709 | 3.035533  | -3.689675 |
| H | -3.173458 | 2.902278  | -4.728204 |
| H | -3.244402 | -0.200008 | -4.960931 |
| H | -4.638917 | 0.856437  | -4.635965 |
| H | -4.257721 | -0.477026 | -3.532744 |
| H | -4.259717 | 1.181024  | -1.623467 |
| H | -4.594179 | 2.461932  | -2.791074 |
| H | -3.226349 | 2.615928  | -1.685759 |

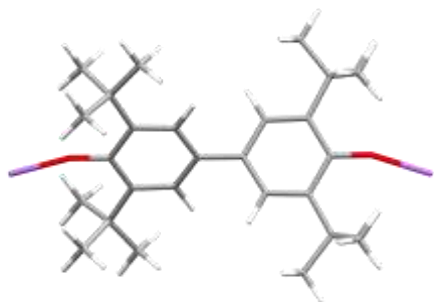

| <i>Element</i> | <i>X</i>  | <i>Y</i>  | <i>Z</i>  |
|----------------|-----------|-----------|-----------|
| C              | 2.017730  | -0.606530 | -4.809620 |
| C              | 1.343940  | -1.643398 | -3.885773 |
| C              | 2.463671  | -2.302387 | -3.061705 |
| C              | 0.692704  | -2.760781 | -4.728790 |
| C              | 0.281728  | -0.960182 | -3.003907 |
| C              | 0.397315  | -0.973419 | -1.618915 |
| C              | -0.530784 | -0.371543 | -0.766791 |
| C              | -0.371348 | -0.413666 | 0.703570  |
| C              | -0.724104 | 0.670338  | 1.506760  |
| C              | -0.591321 | 0.662274  | 2.891491  |
| C              | -0.997313 | 1.896612  | 3.719218  |
| C              | -1.542757 | 3.048951  | 2.856802  |
| C              | 0.228578  | 2.462582  | 4.470764  |
| C              | -2.127292 | 1.525154  | 4.705969  |
| C              | -0.061746 | -0.500207 | 3.537372  |
| O              | 0.081309  | -0.540397 | 4.843428  |
| Na             | 0.069430  | -0.014862 | 6.767550  |
| C              | 0.309263  | -1.618765 | 2.727395  |
| C              | 0.877960  | -2.894810 | 3.376286  |
| C              | -0.152921 | -3.502702 | 4.351138  |
| C              | 2.188011  | -2.568886 | 4.125198  |
| C              | 1.214377  | -3.985126 | 2.344209  |
| C              | 0.139810  | -1.540812 | 1.350098  |
| C              | -1.614738 | 0.270412  | -1.364748 |
| C              | -1.792448 | 0.332442  | -2.743061 |
| C              | -3.015847 | 1.055530  | -3.338031 |
| C              | -2.555377 | 2.231275  | -4.229155 |
| C              | -3.885660 | 0.061786  | -4.140434 |
| C              | -3.937025 | 1.665096  | -2.266109 |
| C              | -0.833279 | -0.293551 | -3.601609 |
| O              | -0.972467 | -0.258016 | -4.908216 |
| Na             | -1.705882 | 0.111783  | -6.725885 |
| H              | 1.278198  | -0.099286 | -5.424792 |
| H              | 2.752024  | -1.092550 | -5.460045 |
| H              | 2.539511  | 0.146494  | -4.214611 |
| H              | 3.181018  | -2.773383 | -3.738426 |
| H              | 3.007973  | -1.574353 | -2.457343 |

|   |           |           |           |
|---|-----------|-----------|-----------|
| H | 2.077844  | -3.077358 | -2.396726 |
| H | -0.115607 | -2.363412 | -5.338138 |
| H | 0.278919  | -3.533340 | -4.076648 |
| H | 1.435525  | -3.230792 | -5.381277 |
| H | 1.252628  | -1.448599 | -1.161951 |
| H | -1.092857 | 1.556299  | 1.010895  |
| H | -1.816773 | 3.888252  | 3.501787  |
| H | -0.800266 | 3.408006  | 2.142620  |
| H | -2.433774 | 2.752359  | 2.301285  |
| H | 0.755540  | 1.680161  | 5.016531  |
| H | 0.943355  | 2.881880  | 3.760312  |
| H | -0.066820 | 3.261040  | 5.160205  |
| H | -2.342101 | 2.355087  | 5.388021  |
| H | -1.876644 | 0.632261  | 5.278215  |
| H | -3.043588 | 1.297050  | 4.158299  |
| H | 0.258326  | -4.392855 | 4.837922  |
| H | -1.054506 | -3.799454 | 3.810379  |
| H | -0.437117 | -2.780119 | 5.112548  |
| H | 2.023239  | -1.797271 | 4.873551  |
| H | 2.582279  | -3.464896 | 4.615251  |
| H | 2.943700  | -2.207060 | 3.424220  |
| H | 0.331841  | -4.306829 | 1.788161  |
| H | 1.965668  | -3.649192 | 1.627025  |
| H | 1.617212  | -4.859836 | 2.860911  |
| H | 0.389292  | -2.392853 | 0.735315  |
| H | -2.351888 | 0.713005  | -0.710906 |
| H | -1.798104 | 1.913313  | -4.945385 |
| H | -2.096973 | 3.009466  | -3.616082 |
| H | -3.403458 | 2.678214  | -4.759372 |
| H | -3.285049 | -0.510381 | -4.847274 |
| H | -4.688736 | 0.582949  | -4.672958 |
| H | -4.346697 | -0.662328 | -3.466222 |
| H | -4.344095 | 0.903096  | -1.599836 |
| H | -4.778800 | 2.166222  | -2.751704 |
| H | -3.415675 | 2.405785  | -1.657791 |

B3LYP/def2TZVP (CPCM – DME)

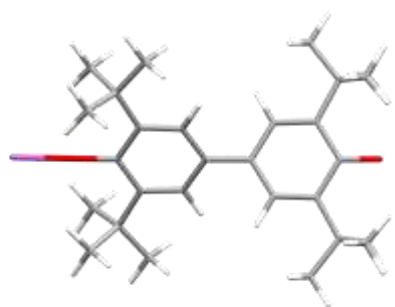

| <i>Element</i> | <i>X</i>  | <i>Y</i>  | <i>Z</i>  |
|----------------|-----------|-----------|-----------|
| C              | 1.992625  | -0.714393 | -4.814257 |
| C              | 1.284039  | -1.723978 | -3.886050 |
| C              | 2.376089  | -2.428557 | -3.063366 |
| C              | 0.587485  | -2.807363 | -4.737516 |
| C              | 0.246297  | -0.998094 | -3.010305 |
| C              | 0.357518  | -1.010489 | -1.625110 |
| C              | -0.546585 | -0.370685 | -0.767939 |
| C              | -0.388077 | -0.411117 | 0.704502  |
| C              | -0.778453 | 0.656974  | 1.519507  |
| C              | -0.645690 | 0.657498  | 2.905520  |
| C              | -1.107027 | 1.875207  | 3.729992  |
| C              | -1.713368 | 2.991597  | 2.861344  |
| C              | 0.090049  | 2.495309  | 4.481592  |
| C              | -2.200764 | 1.450579  | 4.733600  |
| C              | -0.061275 | -0.481587 | 3.562343  |
| O              | 0.094499  | -0.510153 | 4.856132  |
| Na             | 0.410497  | -0.515309 | 6.932950  |
| C              | 0.344901  | -1.587975 | 2.736862  |
| C              | 0.968012  | -2.844124 | 3.376495  |
| C              | -0.025095 | -3.488865 | 4.366962  |
| C              | 2.276699  | -2.470535 | 4.105370  |
| C              | 1.329965  | -3.925639 | 2.343171  |
| C              | 0.163844  | -1.518235 | 1.358154  |
| C              | -1.605231 | 0.312325  | -1.379685 |
| C              | -1.783699 | 0.381937  | -2.756233 |
| C              | -2.973930 | 1.154506  | -3.354023 |
| C              | -2.458376 | 2.292522  | -4.261332 |
| C              | -3.865216 | 0.201387  | -4.178694 |
| C              | -3.869048 | 1.800328  | -2.282863 |
| C              | -0.848155 | -0.285454 | -3.641243 |
| O              | -0.981876 | -0.246837 | -4.919662 |
| H              | 1.262142  | -0.191493 | -5.427164 |
| H              | 2.707112  | -1.227341 | -5.466552 |
| H              | 2.545513  | 0.020563  | -4.222466 |
| H              | 3.072949  | -2.927836 | -3.741620 |
| H              | 2.951687  | -1.724795 | -2.457810 |
| H              | 1.960415  | -3.188299 | -2.397519 |
| H              | -0.194953 | -2.360594 | -5.346540 |
| H              | 0.139137  | -3.566822 | -4.090747 |
| H              | 1.310716  | -3.306374 | -5.390990 |
| H              | 1.194849  | -1.521309 | -1.169748 |
| H              | -1.186647 | 1.529412  | 1.030109  |
| H              | -2.028194 | 3.817212  | 3.504625  |
| H              | -0.993603 | 3.388981  | 2.142915  |
| H              | -2.590745 | 2.648735  | 2.309204  |
| H              | 0.579593  | 1.753728  | 5.107676  |
| H              | 0.823840  | 2.880696  | 3.768922  |

|   |           |           |           |
|---|-----------|-----------|-----------|
| H | -0.239538 | 3.329637  | 5.108855  |
| H | -2.500235 | 2.298933  | 5.357159  |
| H | -1.847357 | 0.646966  | 5.374655  |
| H | -3.086625 | 1.098653  | 4.198452  |
| H | 0.430176  | -4.354378 | 4.858734  |
| H | -0.915422 | -3.835222 | 3.835616  |
| H | -0.335995 | -2.774105 | 5.124695  |
| H | 2.100006  | -1.690203 | 4.841128  |
| H | 2.700536  | -3.345558 | 4.608270  |
| H | 3.016137  | -2.104813 | 3.388150  |
| H | 0.453026  | -4.281719 | 1.798745  |
| H | 2.060052  | -3.567527 | 1.614579  |
| H | 1.769871  | -4.783075 | 2.858781  |
| H | 0.445501  | -2.363749 | 0.747353  |
| H | -2.326057 | 0.791524  | -0.731394 |
| H | -1.820730 | 1.888509  | -5.044278 |
| H | -1.881364 | 3.012749  | -3.674454 |
| H | -3.296298 | 2.827292  | -4.720701 |
| H | -3.280515 | -0.275317 | -4.962000 |
| H | -4.696018 | 0.750108  | -4.634516 |
| H | -4.288271 | -0.574267 | -3.534151 |
| H | -4.312353 | 1.056919  | -1.616419 |
| H | -4.687154 | 2.335952  | -2.771455 |
| H | -3.320647 | 2.520368  | -1.671210 |

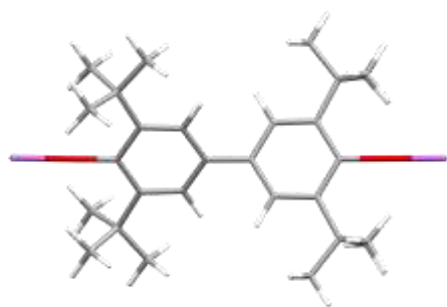

| <i>Element</i> | <i>X</i>  | <i>Y</i>  | <i>Z</i>  |
|----------------|-----------|-----------|-----------|
| C              | 4.442478  | 2.261023  | -1.999891 |
| C              | 3.592074  | 2.488718  | -0.732088 |
| C              | 2.626967  | 3.645798  | -1.045542 |
| C              | 4.489889  | 2.962352  | 0.431224  |
| C              | 2.861799  | 1.189648  | -0.340227 |
| C              | 1.471289  | 1.144341  | -0.319367 |
| C              | 0.741091  | 0.003014  | 0.026746  |
| C              | -0.740573 | -0.002746 | 0.028575  |
| C              | -1.471624 | -1.143977 | -0.316053 |
| C              | -2.862181 | -1.189278 | -0.333492 |
| C              | -3.593423 | -2.488239 | -0.723911 |

|    |           |           |           |
|----|-----------|-----------|-----------|
| C  | -2.629094 | -3.645232 | -1.040069 |
| C  | -4.446954 | -2.260190 | -1.989547 |
| C  | -4.488363 | -2.962197 | 0.441481  |
| C  | -3.613714 | -0.007706 | 0.002661  |
| O  | -4.914031 | -0.006902 | -0.019015 |
| Na | -7.017882 | 0.009315  | -0.120709 |
| C  | -2.872386 | 1.173187  | 0.363282  |
| C  | -3.615529 | 2.467418  | 0.746743  |
| C  | -4.513795 | 2.223859  | 1.978342  |
| C  | -4.467885 | 2.957992  | -0.443311 |
| C  | -2.661898 | 3.618334  | 1.113227  |
| C  | -1.481544 | 1.133679  | 0.367950  |
| C  | 1.482897  | -1.133506 | 0.363974  |
| C  | 2.873724  | -1.173011 | 0.355861  |
| C  | 3.617811  | -2.467348 | 0.737125  |
| C  | 4.467226  | -2.957591 | -0.455166 |
| C  | 4.519116  | -2.224131 | 1.966570  |
| C  | 2.665088  | -3.618367 | 1.105643  |
| C  | 3.614160  | 0.007983  | -0.006260 |
| O  | 4.914419  | 0.007185  | -0.031147 |
| Na | 7.018012  | -0.009001 | -0.138035 |
| H  | 5.142499  | 1.442311  | -1.855007 |
| H  | 5.001839  | 3.166388  | -2.255266 |
| H  | 3.797574  | 2.014711  | -2.847403 |
| H  | 3.205067  | 4.536148  | -1.304929 |
| H  | 1.974701  | 3.418354  | -1.891169 |
| H  | 1.998476  | 3.897308  | -0.188738 |
| H  | 5.192303  | 2.185056  | 0.720793  |
| H  | 3.877797  | 3.213403  | 1.301427  |
| H  | 5.048686  | 3.858500  | 0.144056  |
| H  | 0.911785  | 2.024071  | -0.602995 |
| H  | -0.912822 | -2.023627 | -0.601307 |
| H  | -3.207833 | -4.535509 | -1.298276 |
| H  | -1.978917 | -3.417552 | -1.887240 |
| H  | -1.998489 | -3.896980 | -0.184889 |
| H  | -5.146613 | -1.441518 | -1.842707 |
| H  | -3.804143 | -2.013644 | -2.838580 |
| H  | -5.006945 | -3.165484 | -2.243793 |
| H  | -5.047869 | -3.858264 | 0.155444  |
| H  | -5.190059 | -2.184981 | 0.733001  |
| H  | -3.874125 | -3.213491 | 1.310101  |
| H  | -5.077601 | 3.128450  | 2.226619  |
| H  | -3.901681 | 1.961921  | 2.845305  |
| H  | -5.212166 | 1.411229  | 1.795594  |
| H  | -5.155277 | 2.183143  | -0.772478 |
| H  | -5.041022 | 3.847773  | -0.164723 |

|   |           |           |           |
|---|-----------|-----------|-----------|
| H | -3.822761 | 3.224155  | -1.284652 |
| H | -2.037902 | 3.374286  | 1.975459  |
| H | -2.005502 | 3.886361  | 0.282821  |
| H | -3.248699 | 4.503747  | 1.369962  |
| H | -0.930849 | 2.015180  | 0.663282  |
| H | 0.932933  | -2.015089 | 0.660419  |
| H | 5.153802  | -2.182649 | -0.785815 |
| H | 3.820026  | -3.223522 | -1.294985 |
| H | 5.041050  | -3.847448 | -0.178242 |
| H | 5.217033  | -1.411450 | 1.782325  |
| H | 5.083535  | -3.128791 | 2.213202  |
| H | 3.909145  | -1.962437 | 2.835116  |
| H | 2.043223  | -3.374560 | 1.969481  |
| H | 3.252522  | -4.503851 | 1.360682  |
| H | 2.006643  | -3.886164 | 0.276786  |

## Potassium

*Singly Reduced*

PBE/def2TZVP

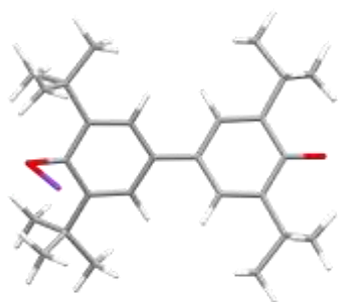

| <i>Element</i> | <i>X</i>  | <i>Y</i>  | <i>Z</i>  |
|----------------|-----------|-----------|-----------|
| C              | -1.849143 | -4.619370 | -1.992670 |
| C              | -0.441296 | -3.983641 | -1.970725 |
| C              | 0.598685  | -5.075954 | -1.624848 |
| C              | -0.124463 | -3.487061 | -3.391115 |
| C              | -0.414032 | -2.843594 | -0.935026 |
| C              | -0.037111 | -1.558330 | -1.295448 |
| C              | -0.059781 | -0.457546 | -0.403422 |
| C              | 0.401579  | 0.861225  | -0.804515 |
| C              | 1.246831  | 1.032026  | -1.934757 |
| C              | 1.730690  | 2.254909  | -2.342022 |
| C              | 2.654793  | 2.387705  | -3.557826 |
| C              | 1.993965  | 3.301591  | -4.616647 |
| C              | 4.011838  | 2.989227  | -3.124307 |
| C              | 2.936388  | 1.031017  | -4.225415 |
| C              | 1.355701  | 3.462418  | -1.581854 |

|   |           |           |           |
|---|-----------|-----------|-----------|
| O | 1.781202  | 4.599766  | -1.916796 |
| C | 0.466205  | 3.293502  | -0.417021 |
| C | 0.031631  | 4.526549  | 0.383318  |
| C | -0.899560 | 4.162572  | 1.552110  |
| C | -0.731245 | 5.507611  | -0.537117 |
| C | 1.275912  | 5.228586  | 0.976343  |
| C | 0.039074  | 2.028855  | -0.079529 |
| C | -0.566843 | -0.709082 | 0.894983  |
| C | -0.954659 | -1.965734 | 1.336299  |
| C | -1.533250 | -2.166660 | 2.749546  |
| C | -1.724342 | -0.834813 | 3.494283  |
| C | -2.914335 | -2.850663 | 2.639478  |
| C | -0.602606 | -3.047913 | 3.616033  |
| C | -0.805036 | -3.108908 | 0.444589  |
| H | -2.599153 | -3.871533 | -2.288883 |
| H | -2.115966 | -5.011624 | -1.003953 |
| H | -1.882999 | -5.443057 | -2.723111 |
| H | 0.606644  | -5.858802 | -2.399036 |
| H | 0.346386  | -5.553311 | -0.667695 |
| H | 1.617870  | -4.648498 | -1.596113 |
| H | -0.200878 | -4.329073 | -4.094908 |
| H | 0.894205  | -3.077725 | -3.475012 |
| H | -0.833321 | -2.713288 | -3.719660 |
| H | 0.257218  | -1.368971 | -2.326351 |
| H | 1.550709  | 0.139761  | -2.480286 |
| H | 1.034193  | 2.877260  | -4.948838 |
| H | 1.814120  | 4.302785  | -4.209686 |
| H | 2.651078  | 3.387291  | -5.496507 |
| H | 4.504989  | 2.338629  | -2.385511 |
| H | 4.676950  | 3.076868  | -3.997966 |
| H | 3.874604  | 3.982521  | -2.682658 |
| H | 3.445024  | 0.331790  | -3.543492 |
| H | 2.015879  | 0.551336  | -4.592375 |
| H | 3.596398  | 1.186585  | -5.091526 |
| H | -1.176327 | 5.081040  | 2.090375  |
| H | -1.830981 | 3.687666  | 1.207583  |
| H | -0.412945 | 3.489596  | 2.275161  |
| H | -1.630990 | 5.028167  | -0.951997 |
| H | -1.051329 | 6.388297  | 0.041767  |
| H | -0.095637 | 5.840469  | -1.365209 |
| H | 1.955647  | 5.554856  | 0.181399  |
| H | 0.963169  | 6.108000  | 1.561244  |
| H | 1.819478  | 4.548334  | 1.650080  |
| H | -0.641342 | 1.913865  | 0.762622  |
| H | -0.624354 | 0.127688  | 1.588956  |
| H | -2.187288 | -1.029765 | 4.472974  |

|   |           |           |          |
|---|-----------|-----------|----------|
| H | -0.770891 | -0.315751 | 3.677565 |
| H | -2.386530 | -0.151541 | 2.942900 |
| H | -3.608865 | -2.215492 | 2.070501 |
| H | -3.341246 | -3.007998 | 3.642557 |
| H | -2.830363 | -3.819967 | 2.133512 |
| H | -0.531799 | -4.059157 | 3.191588 |
| H | 0.398093  | -2.586777 | 3.705863 |
| H | -1.000950 | -3.139977 | 4.638329 |
| O | -0.914652 | -4.320138 | 0.886125 |
| K | 1.616182  | -4.033078 | 1.350362 |

B3LYP/def2TZVP

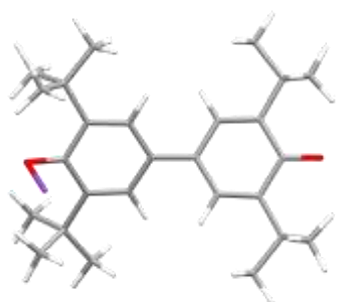

| <i>Element</i> | <i>X</i>  | <i>Y</i>  | <i>Z</i>  |
|----------------|-----------|-----------|-----------|
| C              | -1.887532 | -4.564217 | -1.979672 |
| C              | -0.467101 | -3.960208 | -1.974293 |
| C              | 0.552553  | -5.080029 | -1.666310 |
| C              | -0.166762 | -3.458375 | -3.396264 |
| C              | -0.397978 | -2.829067 | -0.930295 |
| C              | -0.025121 | -1.549760 | -1.287805 |
| C              | -0.033651 | -0.457444 | -0.395379 |
| C              | 0.418553  | 0.860682  | -0.798884 |
| C              | 1.271185  | 1.032726  | -1.918623 |
| C              | 1.742362  | 2.249471  | -2.329591 |
| C              | 2.677824  | 2.387955  | -3.536297 |
| C              | 2.019326  | 3.283517  | -4.609500 |
| C              | 4.022981  | 3.005379  | -3.094312 |
| C              | 2.983654  | 1.031279  | -4.192134 |
| C              | 1.345409  | 3.453615  | -1.582672 |
| O              | 1.756537  | 4.582595  | -1.919280 |
| C              | 0.449613  | 3.286141  | -0.427185 |
| C              | -0.004576 | 4.522736  | 0.357055  |
| C              | -0.942094 | 4.159633  | 1.520439  |
| C              | -0.771673 | 5.486255  | -0.575370 |
| C              | 1.223307  | 5.243221  | 0.957431  |
| C              | 0.037168  | 2.026668  | -0.088179 |
| C              | -0.522268 | -0.712071 | 0.902349  |
| C              | -0.904037 | -1.963088 | 1.342327  |

|   |           |           |           |
|---|-----------|-----------|-----------|
| C | -1.487537 | -2.166461 | 2.753605  |
| C | -1.665453 | -0.837346 | 3.506131  |
| C | -2.877060 | -2.829153 | 2.638666  |
| C | -0.575787 | -3.060362 | 3.623875  |
| C | -0.760347 | -3.096048 | 0.448940  |
| H | -2.619378 | -3.802663 | -2.255854 |
| H | -2.147658 | -4.956550 | -0.999141 |
| H | -1.951376 | -5.374554 | -2.711019 |
| H | 0.546504  | -5.831998 | -2.458896 |
| H | 0.295711  | -5.580810 | -0.733616 |
| H | 1.570247  | -4.673249 | -1.620601 |
| H | -0.272161 | -4.285271 | -4.101276 |
| H | 0.850619  | -3.072286 | -3.492731 |
| H | -0.860258 | -2.673816 | -3.702621 |
| H | 0.250673  | -1.355683 | -2.311906 |
| H | 1.585505  | 0.146136  | -2.445816 |
| H | 1.073619  | 2.849122  | -4.942574 |
| H | 1.827201  | 4.280585  | -4.223024 |
| H | 2.677722  | 3.364576  | -5.478487 |
| H | 4.507981  | 2.371545  | -2.347531 |
| H | 4.693565  | 3.086755  | -3.953925 |
| H | 3.878652  | 3.995077  | -2.669735 |
| H | 3.488932  | 0.348588  | -3.504919 |
| H | 2.079850  | 0.542427  | -4.562622 |
| H | 3.646110  | 1.187159  | -5.045586 |
| H | -1.232102 | 5.072057  | 2.044696  |
| H | -1.857512 | 3.675229  | 1.173714  |
| H | -0.458007 | 3.503352  | 2.247350  |
| H | -1.652482 | 4.993298  | -0.993866 |
| H | -1.110537 | 6.357672  | -0.008916 |
| H | -0.141229 | 5.825616  | -1.392689 |
| H | 1.902393  | 5.575968  | 0.177271  |
| H | 0.896461  | 6.113189  | 1.533181  |
| H | 1.765494  | 4.576848  | 1.633067  |
| H | -0.642695 | 1.906464  | 0.739765  |
| H | -0.571487 | 0.115853  | 1.591040  |
| H | -2.128382 | -1.030020 | 4.475917  |
| H | -0.713069 | -0.335290 | 3.691087  |
| H | -2.314328 | -0.149214 | 2.962106  |
| H | -3.556810 | -2.183977 | 2.078686  |
| H | -3.304021 | -2.986961 | 3.632859  |
| H | -2.810135 | -3.788047 | 2.129814  |
| H | -0.538015 | -4.070950 | 3.218840  |
| H | 0.431751  | -2.632409 | 3.692703  |
| H | -0.963692 | -3.126315 | 4.643127  |
| O | -0.883450 | -4.302645 | 0.880695  |
| K | 1.585121  | -4.377480 | 1.429267  |

B3LYP/def2TZVP (CPCM – DME)

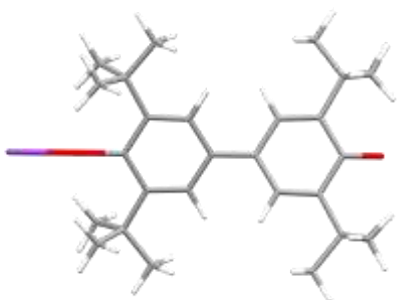

| <i>Element</i> | <i>X</i>  | <i>Y</i>  | <i>Z</i>  |
|----------------|-----------|-----------|-----------|
| C              | -1.586010 | -4.585325 | -2.182253 |
| C              | -0.190500 | -3.983640 | -1.910674 |
| C              | 0.760188  | -5.066809 | -1.356463 |
| C              | 0.378486  | -3.541090 | -3.269873 |
| C              | -0.298918 | -2.820352 | -0.909865 |
| C              | 0.094237  | -1.551217 | -1.260753 |
| C              | 0.013418  | -0.434588 | -0.394866 |
| C              | 0.436105  | 0.884250  | -0.808144 |
| C              | 1.224414  | 1.085136  | -1.971026 |
| C              | 1.650195  | 2.314389  | -2.399226 |
| C              | 2.513276  | 2.464545  | -3.660626 |
| C              | 1.778302  | 3.340798  | -4.698857 |
| C              | 3.871221  | 3.106408  | -3.301380 |
| C              | 2.808979  | 1.112421  | -4.331138 |
| C              | 1.276852  | 3.507510  | -1.630185 |
| O              | 1.644222  | 4.653766  | -1.989384 |
| C              | 0.459174  | 3.314233  | -0.426692 |
| C              | 0.034867  | 4.533116  | 0.405699  |
| C              | -0.819798 | 4.141179  | 1.622743  |
| C              | -0.808273 | 5.497533  | -0.456900 |
| C              | 1.285471  | 5.265707  | 0.939769  |
| C              | 0.084378  | 2.045565  | -0.072128 |
| C              | -0.504756 | -0.682563 | 0.898638  |
| C              | -0.914966 | -1.920006 | 1.333220  |
| C              | -1.458355 | -2.113885 | 2.759318  |
| C              | -1.466428 | -0.806387 | 3.570120  |
| C              | -2.917264 | -2.616388 | 2.702006  |
| C              | -0.577318 | -3.117395 | 3.533894  |
| C              | -0.826810 | -3.056179 | 0.426645  |
| H              | -2.238141 | -3.837885 | -2.640513 |
| H              | -2.054384 | -4.927605 | -1.263862 |
| H              | -1.505061 | -5.429417 | -2.872506 |
| H              | 0.813075  | -5.912350 | -2.047720 |
| H              | 0.426731  | -5.426635 | -0.387180 |
| H              | 1.768829  | -4.662491 | -1.242188 |
| H              | 0.434780  | -4.406821 | -3.933037 |

|   |           |           |           |
|---|-----------|-----------|-----------|
| H | 1.385911  | -3.130114 | -3.178643 |
| H | -0.253776 | -2.794942 | -3.755360 |
| H | 0.459952  | -1.384867 | -2.260406 |
| H | 1.524527  | 0.212863  | -2.527949 |
| H | 0.830090  | 2.878690  | -4.984840 |
| H | 1.576001  | 4.331602  | -4.300827 |
| H | 2.388851  | 3.441573  | -5.600241 |
| H | 4.413494  | 2.478483  | -2.589957 |
| H | 4.486181  | 3.204645  | -4.200036 |
| H | 3.734701  | 4.091102  | -2.862138 |
| H | 3.364047  | 0.440967  | -3.672541 |
| H | 1.896113  | 0.604339  | -4.649382 |
| H | 3.419638  | 1.280473  | -5.220422 |
| H | -1.087551 | 5.043039  | 2.176754  |
| H | -1.748461 | 3.646958  | 1.329433  |
| H | -0.281051 | 3.481943  | 2.306784  |
| H | -1.711932 | 4.997877  | -0.814974 |
| H | -1.115289 | 6.360126  | 0.140665  |
| H | -0.242994 | 5.850644  | -1.315366 |
| H | 1.915432  | 5.609281  | 0.123587  |
| H | 0.983923  | 6.129057  | 1.539028  |
| H | 1.872660  | 4.601360  | 1.578743  |
| H | -0.536823 | 1.915992  | 0.798740  |
| H | -0.551910 | 0.145021  | 1.586830  |
| H | -1.864261 | -1.006303 | 4.567221  |
| H | -0.462855 | -0.394031 | 3.692567  |
| H | -2.097402 | -0.042803 | 3.110836  |
| H | -3.556653 | -1.868614 | 2.226712  |
| H | -3.296800 | -2.790025 | 3.712638  |
| H | -2.995048 | -3.539642 | 2.134792  |
| H | -0.525396 | -4.074430 | 3.022661  |
| H | 0.438863  | -2.728998 | 3.636211  |
| H | -0.979504 | -3.275608 | 4.538239  |
| O | -1.199251 | -4.218215 | 0.790782  |
| K | -1.936824 | -6.519399 | 1.511858  |

*Doubly Reduced*

PBE/def2TZVP

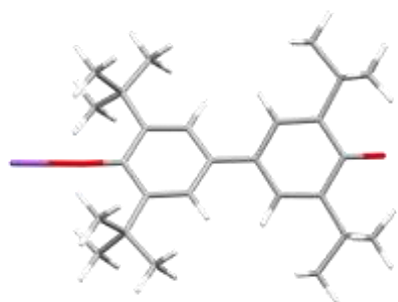

| <i>Element</i> | <i>X</i>  | <i>Y</i>  | <i>Z</i>  |
|----------------|-----------|-----------|-----------|
| C              | 1.222334  | -5.914137 | -1.557155 |
| C              | 1.601560  | -4.945202 | -0.413491 |
| C              | 3.003725  | -4.400381 | -0.737770 |
| C              | 1.714116  | -5.710945 | 0.923469  |
| C              | 0.539833  | -3.835486 | -0.288415 |
| C              | 0.900579  | -2.496424 | -0.430972 |
| C              | -0.011141 | -1.429540 | -0.315054 |
| C              | 0.407519  | -0.029735 | -0.476189 |
| C              | -0.289483 | 1.028756  | 0.145508  |
| C              | 0.074668  | 2.362242  | 0.021357  |
| C              | -0.714355 | 3.471952  | 0.733905  |
| C              | -1.900110 | 2.927892  | 1.548099  |
| C              | 0.214208  | 4.232180  | 1.708287  |
| C              | -1.279962 | 4.460426  | -0.311808 |
| C              | 1.235832  | 2.727617  | -0.789442 |
| O              | 1.601691  | 3.945906  | -0.927740 |
| C              | 1.957593  | 1.631372  | -1.434463 |
| C              | 3.176809  | 1.957268  | -2.311469 |
| C              | 2.752362  | 2.880058  | -3.476718 |
| C              | 4.253827  | 2.668608  | -1.460251 |
| C              | 3.821407  | 0.701491  | -2.921735 |
| C              | 1.528485  | 0.323313  | -1.258292 |
| C              | -1.345532 | -1.781316 | -0.033993 |
| C              | -1.777626 | -3.096863 | 0.126715  |
| C              | -3.257525 | -3.399149 | 0.432280  |
| C              | -4.123775 | -2.129755 | 0.511320  |
| C              | -3.369170 | -4.105550 | 1.801698  |
| C              | -3.860769 | -4.288173 | -0.679028 |
| C              | -0.832334 | -4.178259 | -0.005121 |
| O              | -1.209115 | -5.432922 | 0.121372  |
| K              | -1.743475 | -7.654240 | 0.674180  |
| H              | 1.246600  | -5.387514 | -2.523265 |
| H              | 1.935473  | -6.755558 | -1.607445 |
| H              | 0.205211  | -6.298482 | -1.409140 |
| H              | 3.375221  | -3.726334 | 0.048110  |
| H              | 3.710688  | -5.241764 | -0.820677 |
| H              | 3.019122  | -3.852628 | -1.691669 |
| H              | 0.726210  | -6.069711 | 1.242723  |
| H              | 2.403098  | -6.568228 | 0.830924  |
| H              | 2.099864  | -5.044997 | 1.710057  |
| H              | 1.944485  | -2.244314 | -0.616123 |
| H              | -1.137058 | 0.766768  | 0.780745  |
| H              | -1.572902 | 2.239990  | 2.343172  |
| H              | -2.426824 | 3.768761  | 2.027529  |
| H              | -2.625448 | 2.395939  | 0.912852  |
| H              | 1.067075  | 4.651339  | 1.160018  |
| H              | 0.591865  | 3.549873  | 2.486104  |

|   |           |           |           |
|---|-----------|-----------|-----------|
| H | -0.337418 | 5.049001  | 2.205459  |
| H | -0.460454 | 4.883903  | -0.905639 |
| H | -1.978541 | 3.942528  | -0.987795 |
| H | -1.828132 | 5.276990  | 0.189622  |
| H | 2.016001  | 2.370649  | -4.118141 |
| H | 3.626974  | 3.141411  | -4.097532 |
| H | 2.301602  | 3.798236  | -3.079920 |
| H | 3.836310  | 3.581708  | -1.018098 |
| H | 5.125338  | 2.930411  | -2.085267 |
| H | 4.598788  | 2.006647  | -0.650296 |
| H | 3.123123  | 0.156358  | -3.575640 |
| H | 4.689350  | 0.999565  | -3.531792 |
| H | 4.178883  | 0.005137  | -2.147156 |
| H | 2.055444  | -0.482045 | -1.772356 |
| H | -2.073012 | -0.972358 | 0.027758  |
| H | -4.126087 | -1.575248 | -0.438782 |
| H | -3.781489 | -1.447276 | 1.303339  |
| H | -5.164321 | -2.413307 | 0.738028  |
| H | -3.040271 | -3.429100 | 2.605089  |
| H | -4.412042 | -4.402102 | 2.007726  |
| H | -2.726445 | -4.995882 | 1.825525  |
| H | -4.901108 | -4.564962 | -0.434401 |
| H | -3.258340 | -5.196021 | -0.809378 |
| H | -3.867533 | -3.745179 | -1.636372 |

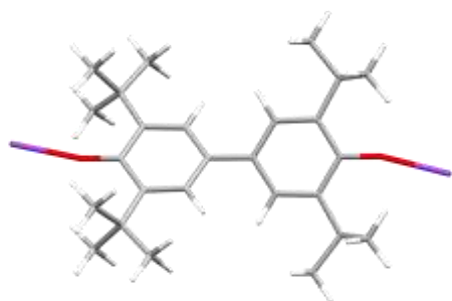

| <i>Element</i> | <i>X</i>  | <i>Y</i>  | <i>Z</i>  |
|----------------|-----------|-----------|-----------|
| C              | 1.291736  | -5.895349 | -1.437238 |
| C              | 1.607738  | -4.938946 | -0.263266 |
| C              | 3.030057  | -4.403409 | -0.503415 |
| C              | 1.644034  | -5.706614 | 1.078911  |
| C              | 0.543932  | -3.826630 | -0.201084 |
| C              | 0.912058  | -2.488098 | -0.350001 |
| C              | -0.009215 | -1.431494 | -0.299970 |
| C              | 0.414590  | -0.025402 | -0.468074 |
| C              | -0.234735 | 1.023148  | 0.200192  |
| C              | 0.136654  | 2.361582  | 0.058690  |
| C              | -0.617417 | 3.464726  | 0.825012  |

|   |           |           |           |
|---|-----------|-----------|-----------|
| C | -1.760764 | 2.920927  | 1.699370  |
| C | 0.354636  | 4.202525  | 1.775191  |
| C | -1.259916 | 4.449519  | -0.180050 |
| C | 1.239571  | 2.706634  | -0.800926 |
| O | 1.612960  | 3.963277  | -0.952240 |
| K | 1.830408  | 6.262548  | -0.851469 |
| C | 1.918605  | 1.640119  | -1.487457 |
| C | 3.100852  | 1.951579  | -2.424895 |
| C | 2.634814  | 2.871216  | -3.575726 |
| C | 4.235842  | 2.633277  | -1.627785 |
| C | 3.699054  | 0.688803  | -3.069091 |
| C | 1.486342  | 0.325589  | -1.304436 |
| C | -1.353293 | -1.774420 | -0.082701 |
| C | -1.792928 | -3.088732 | 0.083559  |
| C | -3.285795 | -3.390993 | 0.314846  |
| C | -4.152722 | -2.120259 | 0.348141  |
| C | -3.471881 | -4.100801 | 1.674936  |
| C | -3.827863 | -4.280767 | -0.826117 |
| C | -0.838290 | -4.163409 | 0.023572  |
| O | -1.214215 | -5.419978 | 0.169115  |
| K | -1.309014 | -7.722883 | 0.347232  |
| H | 1.445206  | -5.379743 | -2.396684 |
| H | 1.953661  | -6.779089 | -1.419061 |
| H | 0.238886  | -6.208867 | -1.405344 |
| H | 3.355021  | -3.729965 | 0.302985  |
| H | 3.737900  | -5.246980 | -0.541966 |
| H | 3.105945  | -3.858346 | -1.455648 |
| H | 0.629353  | -6.001030 | 1.381418  |
| H | 2.294629  | -6.596269 | 1.010464  |
| H | 2.042146  | -5.059139 | 1.874030  |
| H | 1.963611  | -2.233544 | -0.486702 |
| H | -1.048570 | 0.761553  | 0.877311  |
| H | -1.392513 | 2.226946  | 2.468910  |
| H | -2.259436 | 3.758301  | 2.213442  |
| H | -2.519100 | 2.396083  | 1.100148  |
| H | 1.266161  | 4.499958  | 1.238139  |
| H | 0.665351  | 3.534069  | 2.591617  |
| H | -0.126927 | 5.087201  | 2.227841  |
| H | -0.521880 | 4.772362  | -0.927632 |
| H | -2.075711 | 3.953531  | -0.726322 |
| H | -1.685367 | 5.326254  | 0.339372  |
| H | 1.884586  | 2.356373  | -4.194717 |
| H | 3.484978  | 3.143612  | -4.223922 |
| H | 2.177691  | 3.783573  | -3.171949 |
| H | 3.859747  | 3.532543  | -1.123677 |
| H | 5.068327  | 2.909461  | -2.297003 |

|   |           |           |           |
|---|-----------|-----------|-----------|
| H | 4.627316  | 1.948121  | -0.860658 |
| H | 2.963812  | 0.156558  | -3.690805 |
| H | 4.541115  | 0.975940  | -3.718452 |
| H | 4.082794  | -0.014059 | -2.314486 |
| H | 1.978921  | -0.478272 | -1.852131 |
| H | -2.082123 | -0.963562 | -0.072084 |
| H | -4.108948 | -1.567527 | -0.602104 |
| H | -3.849148 | -1.437759 | 1.156061  |
| H | -5.203138 | -2.401227 | 0.523831  |
| H | -3.164502 | -3.436337 | 2.496628  |
| H | -4.530351 | -4.370320 | 1.830385  |
| H | -2.854790 | -5.007190 | 1.718658  |
| H | -4.882761 | -4.547082 | -0.643355 |
| H | -3.230119 | -5.197298 | -0.910175 |
| H | -3.772103 | -3.745359 | -1.785953 |

B3LYP/def2TZVP

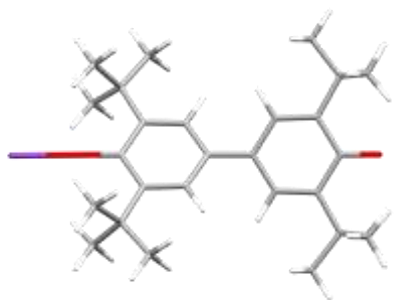

| <i>Element</i> | <i>X</i>  | <i>Y</i>  | <i>Z</i>  |
|----------------|-----------|-----------|-----------|
| C              | 1.273229  | -5.910973 | -1.469446 |
| C              | 1.607704  | -4.932853 | -0.321259 |
| C              | 3.019612  | -4.390748 | -0.603921 |
| C              | 1.683321  | -5.688062 | 1.023136  |
| C              | 0.541637  | -3.823085 | -0.240981 |
| C              | 0.902393  | -2.488035 | -0.383252 |
| C              | -0.011991 | -1.430172 | -0.312784 |
| C              | 0.407535  | -0.027804 | -0.475515 |
| C              | -0.259308 | 1.021482  | 0.175643  |
| C              | 0.103462  | 2.350286  | 0.051826  |
| C              | -0.656661 | 3.457709  | 0.799051  |
| C              | -1.817912 | 2.913549  | 1.647468  |
| C              | 0.301409  | 4.205698  | 1.751788  |
| C              | -1.255564 | 4.457579  | -0.214653 |
| C              | 1.232632  | 2.716995  | -0.789707 |
| O              | 1.596881  | 3.928262  | -0.928042 |
| C              | 1.924180  | 1.629436  | -1.465226 |
| C              | 3.115602  | 1.960274  | -2.378269 |

|   |           |           |           |
|---|-----------|-----------|-----------|
| C | 2.661235  | 2.892491  | -3.522637 |
| C | 4.225337  | 2.656552  | -1.559891 |
| C | 3.736607  | 0.709624  | -3.022180 |
| C | 1.496076  | 0.326445  | -1.287570 |
| C | -1.346897 | -1.781947 | -0.077260 |
| C | -1.777553 | -3.093375 | 0.086543  |
| C | -3.264869 | -3.401674 | 0.346893  |
| C | -4.139636 | -2.136767 | 0.389563  |
| C | -3.423448 | -4.098313 | 1.715403  |
| C | -3.831228 | -4.298019 | -0.775902 |
| C | -0.828423 | -4.161370 | 0.000323  |
| O | -1.202834 | -5.415476 | 0.135377  |
| K | -1.669295 | -7.632208 | 0.594881  |
| H | 1.336622  | -5.395906 | -2.430567 |
| H | 1.982073  | -6.747042 | -1.485831 |
| H | 0.259504  | -6.291951 | -1.366068 |
| H | 3.361285  | -3.714790 | 0.181563  |
| H | 3.725152  | -5.225254 | -0.655899 |
| H | 3.065148  | -3.855312 | -1.553679 |
| H | 0.697399  | -6.040939 | 1.321260  |
| H | 2.370815  | -6.538993 | 0.957022  |
| H | 2.045827  | -5.020655 | 1.807953  |
| H | 1.940424  | -2.232226 | -0.533645 |
| H | -1.079175 | 0.756398  | 0.828971  |
| H | -1.470514 | 2.222480  | 2.419167  |
| H | -2.321305 | 3.745772  | 2.148084  |
| H | -2.560369 | 2.394832  | 1.036253  |
| H | 1.132856  | 4.626695  | 1.190862  |
| H | 0.696915  | 3.518403  | 2.504851  |
| H | -0.228586 | 5.012233  | 2.271659  |
| H | -0.466188 | 4.883863  | -0.829704 |
| H | -1.973700 | 3.950529  | -0.865128 |
| H | -1.781213 | 5.264396  | 0.309184  |
| H | 1.908441  | 2.393404  | -4.139153 |
| H | 3.510667  | 3.151444  | -4.165344 |
| H | 2.230669  | 3.803790  | -3.113560 |
| H | 3.836380  | 3.560480  | -1.096481 |
| H | 5.071079  | 2.917145  | -2.206809 |
| H | 4.591091  | 1.988146  | -0.775391 |
| H | 3.020645  | 0.177281  | -3.652861 |
| H | 4.578860  | 1.007822  | -3.653296 |
| H | 4.114120  | 0.010508  | -2.272066 |
| H | 1.996535  | -0.471089 | -1.819351 |
| H | -2.069042 | -0.979966 | -0.050428 |
| H | -4.114499 | -1.593335 | -0.556537 |
| H | -3.827531 | -1.452776 | 1.180569  |
| H | -5.178070 | -2.420543 | 0.583952  |
| H | -3.120772 | -3.422035 | 2.518081  |

|   |           |           |           |
|---|-----------|-----------|-----------|
| H | -4.466889 | -4.384883 | 1.888120  |
| H | -2.793347 | -4.984157 | 1.769211  |
| H | -4.872944 | -4.567456 | -0.567311 |
| H | -3.236129 | -5.202438 | -0.880341 |
| H | -3.803991 | -3.766166 | -1.729732 |

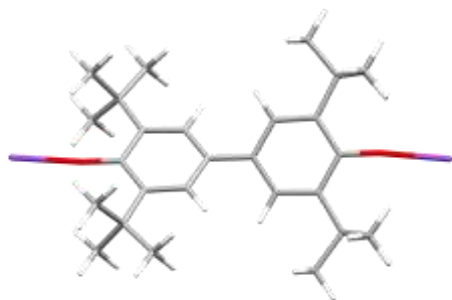

| <i>Element</i> | <i>X</i>  | <i>Y</i>  | <i>Z</i>  |
|----------------|-----------|-----------|-----------|
| C              | 1.355895  | -5.893033 | -1.352784 |
| C              | 1.625996  | -4.920217 | -0.183713 |
| C              | 3.050179  | -4.375092 | -0.387830 |
| C              | 1.633008  | -5.679428 | 1.161261  |
| C              | 0.555519  | -3.812592 | -0.162741 |
| C              | 0.916760  | -2.477988 | -0.311333 |
| C              | -0.007838 | -1.432659 | -0.299458 |
| C              | 0.414047  | -0.024262 | -0.466685 |
| C              | -0.209510 | 1.012149  | 0.229563  |
| C              | 0.156948  | 2.346599  | 0.092832  |
| C              | -0.571300 | 3.444087  | 0.891812  |
| C              | -1.689436 | 2.889898  | 1.791681  |
| C              | 0.422529  | 4.173652  | 1.822106  |
| C              | -1.241054 | 4.444744  | -0.075746 |
| C              | 1.228270  | 2.692367  | -0.792220 |
| O              | 1.600189  | 3.942670  | -0.940990 |
| K              | 2.063307  | 6.193835  | -1.033427 |
| C              | 1.881308  | 1.639819  | -1.509345 |
| C              | 3.034722  | 1.962334  | -2.478268 |
| C              | 2.538882  | 2.892968  | -3.605914 |
| C              | 4.198406  | 2.627566  | -1.711724 |
| C              | 3.611148  | 0.708192  | -3.157760 |
| C              | 1.454096  | 0.329152  | -1.328593 |
| C              | -1.349342 | -1.777144 | -0.122866 |
| C              | -1.783857 | -3.087595 | 0.041285  |
| C              | -3.280549 | -3.399943 | 0.229811  |
| C              | -4.158855 | -2.136860 | 0.223024  |
| C              | -3.508395 | -4.092898 | 1.590761  |
| C              | -3.785497 | -4.300931 | -0.917695 |
| C              | -0.824104 | -4.149227 | 0.021433  |

|   |           |           |           |
|---|-----------|-----------|-----------|
| O | -1.197100 | -5.399499 | 0.167751  |
| K | -1.599811 | -7.652455 | 0.397486  |
| H | 1.487328  | -5.379401 | -2.307369 |
| H | 2.052616  | -6.738014 | -1.325762 |
| H | 0.332050  | -6.261095 | -1.320003 |
| H | 3.345176  | -3.697931 | 0.415479  |
| H | 3.759811  | -5.206859 | -0.398709 |
| H | 3.148829  | -3.842235 | -1.335093 |
| H | 0.633801  | -6.031443 | 1.411280  |
| H | 2.324717  | -6.528233 | 1.126343  |
| H | 1.955752  | -5.015640 | 1.965941  |
| H | 1.959290  | -2.216376 | -0.419365 |
| H | -0.996186 | 0.742959  | 0.919243  |
| H | -1.303243 | 2.192555  | 2.536962  |
| H | -2.169034 | 3.714850  | 2.325508  |
| H | -2.459378 | 2.376929  | 1.212864  |
| H | 1.285442  | 4.529706  | 1.262244  |
| H | 0.791113  | 3.489384  | 2.589056  |
| H | -0.062512 | 5.016333  | 2.326855  |
| H | -0.521443 | 4.821819  | -0.800163 |
| H | -2.038359 | 3.950837  | -0.634929 |
| H | -1.683867 | 5.282204  | 0.474454  |
| H | 1.780851  | 2.385944  | -4.207002 |
| H | 3.365297  | 3.171939  | -4.268226 |
| H | 2.089725  | 3.792769  | -3.191203 |
| H | 3.851684  | 3.509446  | -1.177547 |
| H | 5.001534  | 2.912050  | -2.399830 |
| H | 4.612840  | 1.932311  | -0.978276 |
| H | 2.861367  | 0.189041  | -3.757467 |
| H | 4.426349  | 0.999650  | -3.825280 |
| H | 4.014573  | 0.001198  | -2.430503 |
| H | 1.921974  | -0.465443 | -1.891159 |
| H | -2.072528 | -0.974987 | -0.140706 |
| H | -4.089163 | -1.597560 | -0.723356 |
| H | -3.888700 | -1.449821 | 1.027070  |
| H | -5.204545 | -2.421491 | 0.366558  |
| H | -3.241226 | -3.417834 | 2.406844  |
| H | -4.561031 | -4.369993 | 1.711646  |
| H | -2.888848 | -4.982859 | 1.676810  |
| H | -4.834806 | -4.573299 | -0.762102 |
| H | -3.184946 | -5.205216 | -0.988234 |
| H | -3.711364 | -3.773647 | -1.871355 |

B3LYP/def2TZVP (CPCM – DME)

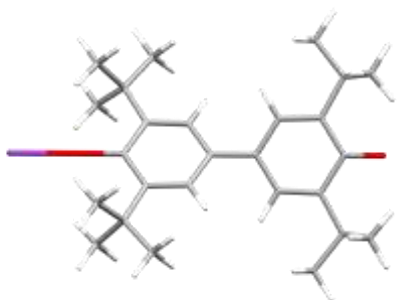

| <i>Element</i> | <i>X</i>  | <i>Y</i>  | <i>Z</i>  |
|----------------|-----------|-----------|-----------|
| C              | 1.309291  | -5.892299 | -1.451229 |
| C              | 1.627209  | -4.929501 | -0.286829 |
| C              | 3.040738  | -4.377174 | -0.540624 |
| C              | 1.683752  | -5.710197 | 1.043609  |
| C              | 0.555364  | -3.824876 | -0.210108 |
| C              | 0.911455  | -2.486805 | -0.354750 |
| C              | -0.005823 | -1.431123 | -0.302207 |
| C              | 0.414316  | -0.020201 | -0.469958 |
| C              | -0.237462 | 1.028675  | 0.190813  |
| C              | 0.121177  | 2.364817  | 0.056946  |
| C              | -0.645771 | 3.461840  | 0.818012  |
| C              | -1.793741 | 2.905685  | 1.677441  |
| C              | 0.310128  | 4.215949  | 1.766937  |
| C              | -1.269934 | 4.457398  | -0.183637 |
| C              | 1.234045  | 2.732630  | -0.797251 |
| O              | 1.598778  | 3.957485  | -0.942878 |
| C              | 1.914475  | 1.648227  | -1.478790 |
| C              | 3.101655  | 1.962438  | -2.407641 |
| C              | 2.645791  | 2.887563  | -3.556213 |
| C              | 4.227393  | 2.651285  | -1.606255 |
| C              | 3.709498  | 0.704725  | -3.051417 |
| C              | 1.485284  | 0.338659  | -1.298100 |
| C              | -1.342323 | -1.783289 | -0.082277 |
| C              | -1.775382 | -3.095372 | 0.088177  |
| C              | -3.266472 | -3.398670 | 0.332292  |
| C              | -4.138124 | -2.131245 | 0.369713  |
| C              | -3.444860 | -4.102562 | 1.694861  |
| C              | -3.820942 | -4.290158 | -0.799327 |
| C              | -0.822295 | -4.173027 | 0.023798  |
| O              | -1.191511 | -5.412943 | 0.171224  |
| K              | -1.884773 | -7.741100 | 0.448029  |
| H              | 1.364454  | -5.361221 | -2.405140 |
| H              | 2.033311  | -6.712826 | -1.481147 |
| H              | 0.308860  | -6.304488 | -1.346835 |
| H              | 3.370072  | -3.711056 | 0.259430  |
| H              | 3.748633  | -5.208472 | -0.591179 |

|   |           |           |           |
|---|-----------|-----------|-----------|
| H | 3.102996  | -3.831338 | -1.484265 |
| H | 0.705821  | -6.113379 | 1.294064  |
| H | 2.403748  | -6.532174 | 0.977817  |
| H | 2.001482  | -5.050004 | 1.854907  |
| H | 1.951616  | -2.232028 | -0.499096 |
| H | -1.050936 | 0.766918  | 0.853525  |
| H | -1.434339 | 2.218357  | 2.446668  |
| H | -2.299151 | 3.732635  | 2.183074  |
| H | -2.538769 | 2.381092  | 1.074893  |
| H | 1.139540  | 4.639212  | 1.205119  |
| H | 0.709222  | 3.533914  | 2.522992  |
| H | -0.219701 | 5.021289  | 2.286404  |
| H | -0.496916 | 4.887055  | -0.816587 |
| H | -2.000966 | 3.948050  | -0.817884 |
| H | -1.788365 | 5.262661  | 0.347327  |
| H | 1.894009  | 2.385196  | -4.171452 |
| H | 3.491977  | 3.144618  | -4.201990 |
| H | 2.214406  | 3.800959  | -3.153312 |
| H | 3.851350  | 3.554766  | -1.131805 |
| H | 5.063233  | 2.911957  | -2.263951 |
| H | 4.606526  | 1.978876  | -0.831506 |
| H | 2.987320  | 0.173774  | -3.675797 |
| H | 4.547747  | 0.995534  | -3.689947 |
| H | 4.090112  | 0.005521  | -2.303370 |
| H | 1.984035  | -0.456491 | -1.835154 |
| H | -2.068363 | -0.983169 | -0.063356 |
| H | -4.106136 | -1.583988 | -0.574610 |
| H | -3.835016 | -1.450080 | 1.167466  |
| H | -5.177866 | -2.414363 | 0.552764  |
| H | -3.143098 | -3.435022 | 2.506258  |
| H | -4.493642 | -4.372652 | 1.854453  |
| H | -2.834611 | -5.000680 | 1.746262  |
| H | -4.864828 | -4.555871 | -0.604217 |
| H | -3.234086 | -5.200290 | -0.893623 |
| H | -3.783138 | -3.756414 | -1.752584 |

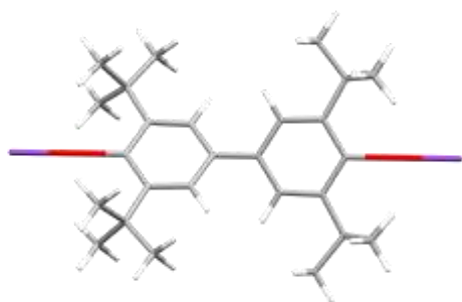

| <i>Element</i> | <i>X</i> | <i>Y</i> | <i>Z</i> |
|----------------|----------|----------|----------|
|----------------|----------|----------|----------|

|   |           |           |           |
|---|-----------|-----------|-----------|
| C | 1.318662  | -5.892050 | -1.441750 |
| C | 1.630562  | -4.928600 | -0.276279 |
| C | 3.044650  | -4.374885 | -0.523804 |
| C | 1.681540  | -5.708205 | 1.055001  |
| C | 0.558055  | -3.824638 | -0.205224 |
| C | 0.912887  | -2.487146 | -0.350020 |
| C | -0.006778 | -1.434117 | -0.299865 |
| C | 0.413048  | -0.022808 | -0.466146 |
| C | -0.235308 | 1.022183  | 0.200786  |
| C | 0.124050  | 2.359541  | 0.066280  |
| C | -0.642513 | 3.454439  | 0.832853  |
| C | -1.785901 | 2.892705  | 1.695774  |
| C | 0.311712  | 4.204261  | 1.786744  |
| C | -1.281458 | 4.446060  | -0.163277 |
| C | 1.227900  | 2.716444  | -0.788887 |
| O | 1.596043  | 3.954020  | -0.934700 |
| K | 2.290817  | 6.289858  | -1.209956 |
| C | 1.907537  | 1.647288  | -1.476033 |
| C | 3.093194  | 1.961259  | -2.408606 |
| C | 2.636172  | 2.882890  | -3.559438 |
| C | 4.228075  | 2.636818  | -1.608916 |
| C | 3.694986  | 0.702315  | -3.057004 |
| C | 1.478883  | 0.335621  | -1.298428 |
| C | -1.343921 | -1.784507 | -0.084359 |
| C | -1.777102 | -3.096040 | 0.082954  |
| C | -3.268711 | -3.400945 | 0.319997  |
| C | -4.141194 | -2.133982 | 0.353013  |
| C | -3.452754 | -4.104664 | 1.681888  |
| C | -3.816903 | -4.292804 | -0.814358 |
| C | -0.821631 | -4.173369 | 0.022875  |
| O | -1.189776 | -5.410944 | 0.168686  |
| K | -1.884612 | -7.746774 | 0.443854  |
| H | 1.377417  | -5.361437 | -2.395687 |
| H | 2.043784  | -6.711500 | -1.467895 |
| H | 0.318543  | -6.305912 | -1.342089 |
| H | 3.369571  | -3.707930 | 0.277447  |
| H | 3.753558  | -5.205364 | -0.570197 |
| H | 3.111000  | -3.830129 | -1.467870 |
| H | 0.703501  | -6.113398 | 1.301321  |
| H | 2.403156  | -6.528823 | 0.993003  |
| H | 1.994174  | -5.047160 | 1.867563  |
| H | 1.953232  | -2.231105 | -0.491198 |
| H | -1.044880 | 0.759304  | 0.866590  |
| H | -1.421346 | 2.205322  | 2.461940  |
| H | -2.291193 | 3.717152  | 2.205052  |
| H | -2.531774 | 2.368083  | 1.095052  |
| H | 1.158104  | 4.613355  | 1.241145  |
| H | 0.692964  | 3.522659  | 2.551625  |

|   |           |           |           |
|---|-----------|-----------|-----------|
| H | -0.213765 | 5.019068  | 2.294633  |
| H | -0.528153 | 4.867230  | -0.824033 |
| H | -2.029340 | 3.935865  | -0.775954 |
| H | -1.782889 | 5.258886  | 0.371388  |
| H | 1.899633  | 2.370130  | -4.183589 |
| H | 3.484732  | 3.154201  | -4.195301 |
| H | 2.181138  | 3.789424  | -3.168853 |
| H | 3.865029  | 3.527571  | -1.102746 |
| H | 5.053682  | 2.913756  | -2.271987 |
| H | 4.619499  | 1.948731  | -0.855045 |
| H | 2.969264  | 0.175562  | -3.680113 |
| H | 4.531718  | 0.992070  | -3.697565 |
| H | 4.076182  | 0.001006  | -2.311835 |
| H | 1.974271  | -0.457676 | -1.839794 |
| H | -2.070084 | -0.984373 | -0.067621 |
| H | -4.104942 | -1.586810 | -0.591283 |
| H | -3.842860 | -1.452799 | 1.152643  |
| H | -5.181548 | -2.417703 | 0.530675  |
| H | -3.155048 | -3.436986 | 2.494646  |
| H | -4.502056 | -4.374978 | 1.836425  |
| H | -2.842901 | -5.002725 | 1.736795  |
| H | -4.861612 | -4.558302 | -0.624400 |
| H | -3.230230 | -5.203239 | -0.905673 |
| H | -3.774246 | -3.759494 | -1.767635 |

## Tetramethylammonium

*Singly Reduced*

PBE/def2TZVP

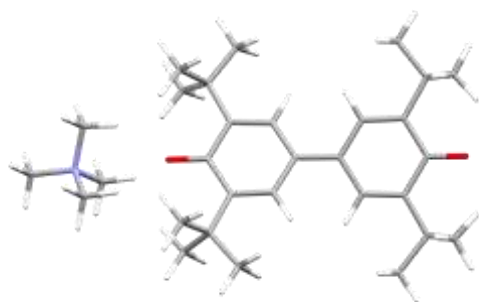

| <i>Element</i> | <i>X</i>  | <i>Y</i>  | <i>Z</i>  |
|----------------|-----------|-----------|-----------|
| C              | 0.770350  | -6.355537 | -2.173037 |
| C              | 1.334572  | -5.525180 | -0.996949 |
| C              | 2.693097  | -4.968624 | -1.458769 |
| C              | 1.616475  | -6.422544 | 0.228859  |
| C              | 0.330709  | -4.419452 | -0.624887 |
| C              | 0.707763  | -3.088957 | -0.693035 |
| C              | -0.156021 | -2.013082 | -0.381954 |

|   |           |           |           |
|---|-----------|-----------|-----------|
| C | 0.286028  | -0.630841 | -0.442577 |
| C | -0.434373 | 0.405140  | 0.212002  |
| C | -0.051601 | 1.727669  | 0.188502  |
| C | -0.851979 | 2.806832  | 0.927729  |
| C | -2.079177 | 2.227941  | 1.651893  |
| C | 0.041235  | 3.488849  | 1.989856  |
| C | -1.359433 | 3.863004  | -0.081871 |
| C | 1.161111  | 2.110669  | -0.556962 |
| O | 1.544659  | 3.311419  | -0.606757 |
| C | 1.910205  | 1.041682  | -1.241955 |
| C | 3.169082  | 1.399180  | -2.041444 |
| C | 2.809393  | 2.390404  | -3.172448 |
| C | 4.218861  | 2.038904  | -1.102869 |
| C | 3.816456  | 0.164344  | -2.690987 |
| C | 1.456983  | -0.255694 | -1.155799 |
| C | -1.479885 | -2.357687 | -0.021482 |
| C | -1.937359 | -3.661789 | 0.060582  |
| C | -3.410672 | -3.942109 | 0.407122  |
| C | -4.234836 | -2.656385 | 0.597702  |
| C | -3.501405 | -4.727028 | 1.735065  |
| C | -4.072114 | -4.730341 | -0.746646 |
| C | -1.019128 | -4.759774 | -0.201756 |
| O | -1.391962 | -5.997977 | -0.067232 |
| H | 0.725775  | -5.737290 | -3.081832 |
| H | 1.420744  | -7.220474 | -2.384390 |
| H | -0.246186 | -6.707494 | -1.961905 |
| H | 3.197114  | -4.395019 | -0.666841 |
| H | 3.352747  | -5.806709 | -1.731736 |
| H | 2.594092  | -4.322314 | -2.343243 |
| H | 0.685239  | -6.824965 | 0.639734  |
| H | 2.282040  | -7.257413 | -0.047187 |
| H | 2.112611  | -5.839653 | 1.019137  |
| H | 1.732727  | -2.851096 | -0.969862 |
| H | -1.312785 | 0.122769  | 0.790260  |
| H | -1.797057 | 1.489315  | 2.417965  |
| H | -2.615191 | 3.043840  | 2.159384  |
| H | -2.784578 | 1.751428  | 0.953615  |
| H | 0.392048  | 2.752671  | 2.729406  |
| H | -0.536282 | 4.260039  | 2.524366  |
| H | 0.912475  | 3.959705  | 1.520824  |
| H | -2.013980 | 3.395332  | -0.833384 |
| H | -1.943344 | 4.633824  | 0.446206  |
| H | -0.519807 | 4.343497  | -0.596448 |
| H | 2.078312  | 1.940691  | -3.861747 |
| H | 3.713076  | 2.641490  | -3.750557 |
| H | 2.384144  | 3.312467  | -2.760389 |

|   |           |            |           |
|---|-----------|------------|-----------|
| H | 4.500716  | 1.336697   | -0.303217 |
| H | 3.825030  | 2.953556   | -0.645717 |
| H | 5.127726  | 2.287545   | -1.673940 |
| H | 3.140847  | -0.329087  | -3.406546 |
| H | 4.713772  | 0.478311   | -3.244873 |
| H | 4.131849  | -0.579027  | -1.942512 |
| H | 1.997104  | -1.036226  | -1.689134 |
| H | -2.180444 | -1.545734  | 0.162451  |
| H | -4.244447 | -2.034719  | -0.309503 |
| H | -3.860512 | -2.044236  | 1.431715  |
| H | -5.277299 | -2.926364  | 0.826637  |
| H | -3.117534 | -4.114830  | 2.564725  |
| H | -4.549248 | -4.987043  | 1.959980  |
| H | -2.905049 | -5.643405  | 1.686348  |
| H | -5.095119 | -5.035990  | -0.471414 |
| H | -3.486260 | -5.618560  | -1.010822 |
| H | -4.139193 | -4.097511  | -1.643931 |
| N | -2.077164 | -8.974883  | 0.960235  |
| C | -1.087711 | -9.032894  | -0.173801 |
| H | -1.527336 | -9.618870  | -0.989513 |
| H | -0.894215 | -7.994664  | -0.483480 |
| H | -0.169327 | -9.511304  | 0.185902  |
| C | -3.326666 | -8.291451  | 0.469795  |
| H | -4.041126 | -8.229651  | 1.298908  |
| H | -3.030432 | -7.286966  | 0.131024  |
| H | -3.747497 | -8.883572  | -0.351372 |
| C | -2.395152 | -10.353502 | 1.442375  |
| H | -1.472750 | -10.831633 | 1.792170  |
| H | -3.116515 | -10.287039 | 2.265174  |
| H | -2.824460 | -10.930810 | 0.615155  |
| C | -1.484687 | -8.157279  | 2.078647  |
| H | -2.214658 | -8.102045  | 2.894615  |
| H | -0.566466 | -8.648664  | 2.420919  |
| H | -1.272504 | -7.158205  | 1.665166  |

B3LYP/def2TZVP

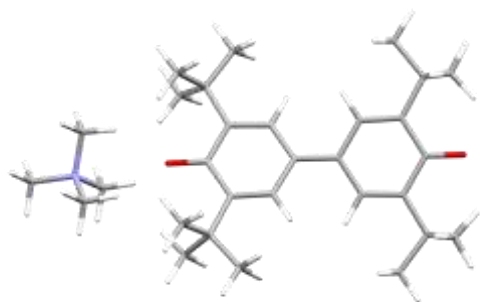

| <i>Element</i> | <i>X</i>  | <i>Y</i>  | <i>Z</i>  |
|----------------|-----------|-----------|-----------|
| C              | 0.786217  | -6.353234 | -2.161176 |
| C              | 1.335793  | -5.522407 | -0.980461 |
| C              | 2.700661  | -4.970809 | -1.427934 |
| C              | 1.604827  | -6.420350 | 0.245864  |
| C              | 0.331741  | -4.413468 | -0.619741 |
| C              | 0.706683  | -3.089532 | -0.684752 |
| C              | -0.156418 | -2.017330 | -0.384029 |
| C              | 0.284546  | -0.638516 | -0.442022 |
| C              | -0.426547 | 0.392769  | 0.222736  |
| C              | -0.047811 | 1.707155  | 0.202330  |
| C              | -0.837529 | 2.786123  | 0.953442  |
| C              | -2.057265 | 2.206972  | 1.688987  |
| C              | 0.064449  | 3.461995  | 2.009619  |
| C              | -1.357356 | 3.845418  | -0.043846 |
| C              | 1.154957  | 2.089784  | -0.552256 |
| O              | 1.534271  | 3.279145  | -0.600469 |
| C              | 1.897215  | 1.027946  | -1.248006 |
| C              | 3.147910  | 1.392716  | -2.057198 |
| C              | 2.778558  | 2.385340  | -3.181498 |
| C              | 4.207293  | 2.026706  | -1.128414 |
| C              | 3.790985  | 0.162509  | -2.718631 |
| C              | 1.445669  | -0.260538 | -1.163095 |
| C              | -1.478006 | -2.361421 | -0.036247 |
| C              | -1.934296 | -3.658692 | 0.041352  |
| C              | -3.409656 | -3.943843 | 0.373686  |
| C              | -4.239389 | -2.661363 | 0.558491  |
| C              | -3.514475 | -4.729439 | 1.698362  |
| C              | -4.061256 | -4.730726 | -0.784627 |
| C              | -1.016675 | -4.751605 | -0.211151 |
| O              | -1.387610 | -5.980103 | -0.080254 |
| H              | 0.749050  | -5.739076 | -3.063214 |
| H              | 1.437086  | -7.209182 | -2.365373 |
| H              | -0.221680 | -6.708240 | -1.964253 |
| H              | 3.193081  | -4.402156 | -0.636979 |
| H              | 3.356668  | -5.803994 | -1.691059 |
| H              | 2.613586  | -4.330213 | -2.307151 |
| H              | 0.681003  | -6.829491 | 0.639792  |
| H              | 2.275980  | -7.243184 | -0.020041 |
| H              | 2.081587  | -5.840156 | 1.038808  |
| H              | 1.723971  | -2.852335 | -0.949358 |
| H              | -1.290422 | 0.107406  | 0.801280  |
| H              | -1.769359 | 1.470970  | 2.442990  |
| H              | -2.583239 | 3.014704  | 2.201807  |
| H              | -2.764913 | 1.737807  | 1.001702  |
| H              | 0.423146  | 2.725591  | 2.733088  |
| H              | -0.505362 | 4.220040  | 2.554131  |
| H              | 0.922539  | 3.938341  | 1.543166  |

|   |           |            |           |
|---|-----------|------------|-----------|
| H | -2.012231 | 3.382316   | -0.786126 |
| H | -1.935906 | 4.604705   | 0.489619  |
| H | -0.534637 | 4.331754   | -0.560805 |
| H | 2.043100  | 1.941130   | -3.856799 |
| H | 3.668861  | 2.631227   | -3.766864 |
| H | 2.365365  | 3.303103   | -2.771876 |
| H | 4.490992  | 1.326653   | -0.338591 |
| H | 3.829394  | 2.935750   | -0.668514 |
| H | 5.105767  | 2.269869   | -1.702370 |
| H | 3.114061  | -0.324278  | -3.424197 |
| H | 4.675905  | 0.476716   | -3.275625 |
| H | 4.111591  | -0.577591  | -1.981921 |
| H | 1.972692  | -1.033805  | -1.698274 |
| H | -2.172189 | -1.556275  | 0.140284  |
| H | -4.241428 | -2.042999  | -0.340635 |
| H | -3.877256 | -2.054913  | 1.390766  |
| H | -5.275706 | -2.931482  | 0.774951  |
| H | -3.134280 | -4.125300  | 2.524913  |
| H | -4.557887 | -4.979361  | 1.915199  |
| H | -2.932300 | -5.643231  | 1.655798  |
| H | -5.080526 | -5.030120  | -0.521270 |
| H | -3.483485 | -5.614608  | -1.041086 |
| H | -4.117149 | -4.103018  | -1.676303 |
| N | -2.070869 | -8.940997  | 0.965901  |
| C | -1.076333 | -9.014305  | -0.161669 |
| H | -1.504461 | -9.615660  | -0.960812 |
| H | -0.887344 | -7.994571  | -0.491779 |
| H | -0.163843 | -9.476278  | 0.208221  |
| C | -3.321189 | -8.271959  | 0.460492  |
| H | -4.031687 | -8.196947  | 1.280515  |
| H | -3.036510 | -7.283816  | 0.103610  |
| H | -3.736394 | -8.878060  | -0.341878 |
| C | -2.386576 | -10.312488 | 1.463330  |
| H | -1.472404 | -10.780394 | 1.821956  |
| H | -3.107040 | -10.239747 | 2.275048  |
| H | -2.806258 | -10.898812 | 0.648836  |
| C | -1.487591 | -8.111442  | 2.079600  |
| H | -2.216873 | -8.052300  | 2.884385  |
| H | -0.578404 | -8.594708  | 2.430159  |
| H | -1.274940 | -7.124178  | 1.668851  |

B3LYP/def2TZVP (CPCM – DME)

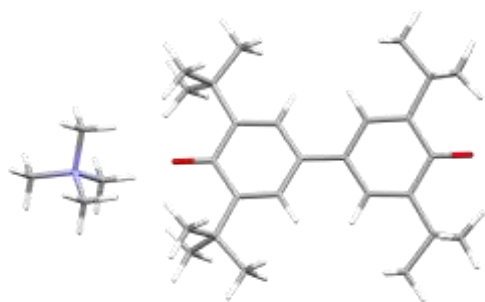

| <i>Element</i> | <i>X</i>  | <i>Y</i>  | <i>Z</i>  |
|----------------|-----------|-----------|-----------|
| C              | 0.739245  | -6.293483 | -2.239005 |
| C              | 1.320098  | -5.478026 | -1.062915 |
| C              | 2.678922  | -4.927073 | -1.528365 |
| C              | 1.598067  | -6.399230 | 0.143769  |
| C              | 0.334793  | -4.365557 | -0.667334 |
| C              | 0.707098  | -3.044985 | -0.727730 |
| C              | -0.146403 | -1.968268 | -0.385959 |
| C              | 0.293541  | -0.593679 | -0.448698 |
| C              | -0.443541 | 0.454240  | 0.161626  |
| C              | -0.065224 | 1.770566  | 0.130640  |
| C              | -0.901857 | 2.856603  | 0.823482  |
| C              | -2.150354 | 2.282127  | 1.513804  |
| C              | -0.060467 | 3.563127  | 1.908619  |
| C              | -1.387416 | 3.889858  | -0.216897 |
| C              | 1.166488  | 2.144281  | -0.573556 |
| O              | 1.547051  | 3.341066  | -0.629707 |
| C              | 1.937820  | 1.070656  | -1.210019 |
| C              | 3.229640  | 1.411675  | -1.967825 |
| C              | 2.920944  | 2.376067  | -3.133788 |
| C              | 4.248067  | 2.061992  | -1.005767 |
| C              | 3.901544  | 0.166043  | -2.569845 |
| C              | 1.485253  | -0.219339 | -1.122064 |
| C              | -1.459920 | -2.315836 | 0.012651  |
| C              | -1.917591 | -3.607946 | 0.095196  |
| C              | -3.370492 | -3.902113 | 0.504160  |
| C              | -4.183591 | -2.622095 | 0.762986  |
| C              | -3.396120 | -4.721687 | 1.812163  |
| C              | -4.088864 | -4.669782 | -0.626962 |
| C              | -1.011675 | -4.708700 | -0.219798 |
| O              | -1.382133 | -5.919528 | -0.110955 |
| H              | 0.640930  | -5.660384 | -3.124143 |
| H              | 1.406659  | -7.122217 | -2.490783 |
| H              | -0.241427 | -6.693867 | -1.998053 |
| H              | 3.187024  | -4.368067 | -0.739930 |
| H              | 3.325412  | -5.761306 | -1.808947 |
| H              | 2.580998  | -4.277761 | -2.400693 |

|   |           |            |           |
|---|-----------|------------|-----------|
| H | 0.680609  | -6.834404  | 0.525015  |
| H | 2.276256  | -7.206938  | -0.144933 |
| H | 2.071215  | -5.834089  | 0.950411  |
| H | 1.714785  | -2.809530  | -1.027527 |
| H | -1.336571 | 0.187210   | 0.702450  |
| H | -1.892675 | 1.564288   | 2.295505  |
| H | -2.705282 | 3.096284   | 1.984240  |
| H | -2.821494 | 1.792022   | 0.805205  |
| H | 0.262534  | 2.846175   | 2.667698  |
| H | -0.660270 | 4.330977   | 2.404800  |
| H | 0.819569  | 4.032033   | 1.476327  |
| H | -2.011913 | 3.405877   | -0.972057 |
| H | -1.989092 | 4.659377   | 0.274432  |
| H | -0.547262 | 4.367073   | -0.714429 |
| H | 2.227383  | 1.911322   | -3.839122 |
| H | 3.840911  | 2.614663   | -3.674424 |
| H | 2.479287  | 3.300164   | -2.770204 |
| H | 4.499902  | 1.373518   | -0.195139 |
| H | 3.848716  | 2.975845   | -0.574013 |
| H | 5.169854  | 2.300006   | -1.543559 |
| H | 3.258903  | -0.335987  | -3.296264 |
| H | 4.813032  | 0.467654   | -3.089781 |
| H | 4.183795  | -0.558388  | -1.802811 |
| H | 2.046600  | -0.996482  | -1.613975 |
| H | -2.144242 | -1.513510  | 0.233913  |
| H | -4.242468 | -1.987634  | -0.123635 |
| H | -3.768387 | -2.030439  | 1.581416  |
| H | -5.203578 | -2.896875  | 1.040081  |
| H | -2.956036 | -4.144252  | 2.628723  |
| H | -4.426438 | -4.963568  | 2.087224  |
| H | -2.837038 | -5.645354  | 1.708461  |
| H | -5.104662 | -4.933238  | -0.319793 |
| H | -3.555804 | -5.578632  | -0.891254 |
| H | -4.159615 | -4.044453  | -1.520233 |
| N | -2.109432 | -9.110398  | 0.952800  |
| C | -1.179806 | -9.167190  | -0.227204 |
| H | -1.664838 | -9.723992  | -1.024650 |
| H | -0.974815 | -8.147094  | -0.537536 |
| H | -0.263713 | -9.668324  | 0.074051  |
| C | -3.373713 | -8.407574  | 0.543470  |
| H | -4.036309 | -8.354429  | 1.403328  |
| H | -3.105313 | -7.412061  | 0.203498  |
| H | -3.843260 | -8.976252  | -0.254908 |
| C | -2.426994 | -10.496849 | 1.422573  |
| H | -1.504287 | -10.988776 | 1.718630  |
| H | -3.104209 | -10.433370 | 2.270267  |
| H | -2.897676 | -11.043969 | 0.610032  |
| C | -1.451288 | -8.335219  | 2.059986  |

|   |           |           |          |
|---|-----------|-----------|----------|
| H | -2.129246 | -8.297553 | 2.908476 |
| H | -0.531291 | -8.841846 | 2.339557 |
| H | -1.242616 | -7.335565 | 1.688964 |

*Doubly Reduced*

PBE/def2TZVP

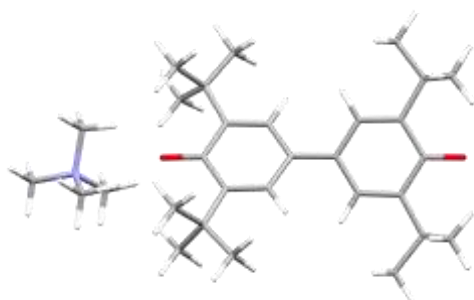

| <i>Element</i> | <i>X</i>  | <i>Y</i>  | <i>Z</i>  |
|----------------|-----------|-----------|-----------|
| C              | 0.874156  | -6.420239 | -2.096967 |
| C              | 1.373008  | -5.559490 | -0.913057 |
| C              | 2.743023  | -4.993331 | -1.327864 |
| C              | 1.617527  | -6.431182 | 0.338710  |
| C              | 0.332523  | -4.465678 | -0.600362 |
| C              | 0.711748  | -3.120903 | -0.647837 |
| C              | -0.170622 | -2.052520 | -0.413937 |
| C              | 0.268748  | -0.646179 | -0.456222 |
| C              | -0.370238 | 0.350997  | 0.306494  |
| C              | 0.014512  | 1.688354  | 0.299001  |
| C              | -0.715205 | 2.729178  | 1.164696  |
| C              | -1.867146 | 2.123924  | 1.983887  |
| C              | 0.278976  | 3.372715  | 2.158111  |
| C              | -1.313449 | 3.828748  | 0.257533  |
| C              | 1.134932  | 2.124220  | -0.527899 |
| O              | 1.518577  | 3.350479  | -0.559386 |
| C              | 1.795248  | 1.089507  | -1.317085 |
| C              | 2.974185  | 1.487569  | -2.220910 |
| C              | 2.507628  | 2.534625  | -3.257875 |
| C              | 4.106010  | 2.092718  | -1.358977 |
| C              | 3.564046  | 0.296440  | -2.993849 |
| C              | 1.350250  | -0.227587 | -1.255902 |
| C              | -1.503663 | -2.411418 | -0.148845 |
| C              | -1.950515 | -3.733436 | -0.069067 |
| C              | -3.443170 | -4.016577 | 0.193476  |
| C              | -4.295450 | -2.738656 | 0.292552  |
| C              | -3.606746 | -4.758268 | 1.538918  |
| C              | -4.026815 | -4.849587 | -0.971130 |
| C              | -1.021930 | -4.817697 | -0.260680 |
| O              | -1.401686 | -6.091554 | -0.137357 |

|   |           |           |           |
|---|-----------|-----------|-----------|
| H | 0.877869  | -5.818988 | -3.018677 |
| H | 1.532626  | -7.292689 | -2.257248 |
| H | -0.154851 | -6.760175 | -1.925473 |
| H | 3.207145  | -4.403312 | -0.524009 |
| H | 3.422592  | -5.828075 | -1.567422 |
| H | 2.667573  | -4.352761 | -2.218468 |
| H | 0.668210  | -6.814265 | 0.725677  |
| H | 2.288242  | -7.278705 | 0.108438  |
| H | 2.088012  | -5.826967 | 1.129146  |
| H | 1.751212  | -2.869062 | -0.856878 |
| H | -1.188688 | 0.036798  | 0.958099  |
| H | -1.511674 | 1.352553  | 2.685073  |
| H | -2.350714 | 2.919497  | 2.574666  |
| H | -2.635297 | 1.669581  | 1.338322  |
| H | 1.114595  | 3.818230  | 1.602740  |
| H | 0.674675  | 2.610112  | 2.847859  |
| H | -0.222443 | 4.153592  | 2.757608  |
| H | -0.513632 | 4.283014  | -0.341717 |
| H | -2.065545 | 3.394795  | -0.420587 |
| H | -1.806049 | 4.608117  | 0.866232  |
| H | 1.737050  | 2.101462  | -3.915408 |
| H | 3.354735  | 2.861250  | -3.887360 |
| H | 2.083625  | 3.402624  | -2.736456 |
| H | 3.717115  | 2.950181  | -0.794419 |
| H | 4.945531  | 2.421815  | -1.997305 |
| H | 4.487098  | 1.340935  | -0.649387 |
| H | 2.821879  | -0.167849 | -3.662073 |
| H | 4.404831  | 0.646461  | -3.615378 |
| H | 3.947534  | -0.482943 | -2.316547 |
| H | 1.835069  | -0.981277 | -1.880390 |
| H | -2.219680 | -1.599136 | -0.026291 |
| H | -4.250503 | -2.144664 | -0.631718 |
| H | -3.978200 | -2.094549 | 1.125756  |
| H | -5.348344 | -3.017822 | 0.464311  |
| H | -3.303087 | -4.100904 | 2.367702  |
| H | -4.658166 | -5.055941 | 1.703443  |
| H | -2.969596 | -5.647824 | 1.561752  |
| H | -5.055519 | -5.182074 | -0.743807 |
| H | -3.394743 | -5.721264 | -1.181903 |
| H | -4.063110 | -4.235263 | -1.883472 |
| N | -2.027396 | -8.889384 | 1.041440  |
| C | -1.001712 | -8.990855 | -0.058035 |
| H | -1.403728 | -9.641207 | -0.844985 |
| H | -0.838426 | -7.955871 | -0.417144 |
| H | -0.081694 | -9.417361 | 0.359169  |
| C | -3.270409 | -8.264423 | 0.462142  |
| H | -4.014553 | -8.159023 | 1.260596  |
| H | -2.958839 | -7.276655 | 0.069729  |

|   |           |            |           |
|---|-----------|------------|-----------|
| H | -3.648709 | -8.921833  | -0.330676 |
| C | -2.329523 | -10.236350 | 1.604896  |
| H | -1.408283 | -10.666900 | 2.015961  |
| H | -3.078585 | -10.132016 | 2.399264  |
| H | -2.718844 | -10.878004 | 0.803961  |
| C | -1.488768 | -7.975740  | 2.114243  |
| H | -2.247585 | -7.880316  | 2.900417  |
| H | -0.569454 | -8.418785  | 2.516228  |
| H | -1.295090 | -7.007338  | 1.603625  |

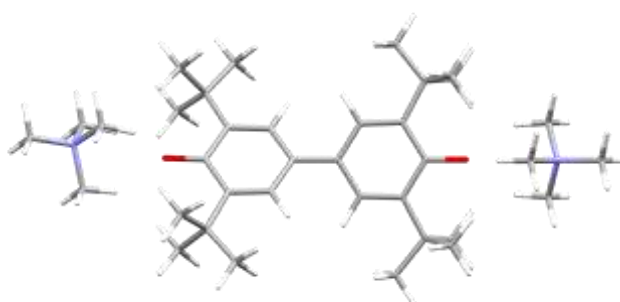

| <i>Element</i> | <i>X</i>  | <i>Y</i>  | <i>Z</i>  |
|----------------|-----------|-----------|-----------|
| C              | -4.405126 | 3.015310  | 0.899901  |
| C              | -3.536004 | 2.622916  | -0.317387 |
| C              | -2.540484 | 3.775707  | -0.538886 |
| C              | -4.392175 | 2.527153  | -1.599775 |
| C              | -2.847466 | 1.273989  | -0.035938 |
| C              | -1.453493 | 1.193904  | -0.037394 |
| C              | -0.746937 | 0.015772  | 0.244330  |
| C              | 0.730105  | -0.028854 | 0.226116  |
| C              | 1.429280  | -1.191703 | -0.128172 |
| C              | 2.822867  | -1.270987 | -0.162896 |
| C              | 3.503941  | -2.604458 | -0.524694 |
| C              | 2.502910  | -3.745838 | -0.778148 |
| C              | 4.330190  | -2.446745 | -1.820518 |
| C              | 4.400844  | -3.054372 | 0.651859  |
| C              | 3.613948  | -0.103803 | 0.146876  |
| O              | 4.933947  | -0.124940 | 0.067453  |
| C              | 2.903576  | 1.085115  | 0.555275  |
| C              | 3.674465  | 2.343292  | 0.997870  |
| C              | 4.573288  | 1.998115  | 2.207623  |
| C              | 4.515646  | 2.887148  | -0.178629 |
| C              | 2.752740  | 3.492050  | 1.444620  |
| C              | 1.507720  | 1.084591  | 0.576759  |
| C              | -1.516831 | -1.113661 | 0.559037  |
| C              | -2.912810 | -1.113929 | 0.569935  |
| C              | -3.673928 | -2.392339 | 0.969355  |

|   |           |           |           |
|---|-----------|-----------|-----------|
| C | -2.742731 | -3.560714 | 1.338921  |
| C | -4.542474 | -2.879533 | -0.212079 |
| C | -4.544260 | -2.106160 | 2.214810  |
| C | -3.631800 | 0.092835  | 0.235691  |
| O | -4.953275 | 0.117027  | 0.188016  |
| H | -3.758538 | 3.254842  | 1.757421  |
| H | -5.017426 | 3.906338  | 0.677151  |
| H | -5.057909 | 2.185891  | 1.198037  |
| H | -1.901052 | 3.606169  | -1.418007 |
| H | -3.099749 | 4.710087  | -0.707324 |
| H | -1.889125 | 3.927998  | 0.334301  |
| H | -5.087509 | 1.684731  | -1.531716 |
| H | -4.960496 | 3.459190  | -1.764786 |
| H | -3.743738 | 2.363439  | -2.473791 |
| H | -0.870081 | 2.079818  | -0.289237 |
| H | 0.839691  | -2.064827 | -0.408670 |
| H | 1.843354  | -3.534634 | -1.633046 |
| H | 3.057597  | -4.670739 | -1.004188 |
| H | 1.871894  | -3.940248 | 0.101591  |
| H | 5.027385  | -1.608175 | -1.728229 |
| H | 3.661746  | -2.241609 | -2.670387 |
| H | 4.894011  | -3.369465 | -2.043234 |
| H | 5.060824  | -2.239861 | 0.974265  |
| H | 3.774186  | -3.335174 | 1.511651  |
| H | 5.007320  | -3.933330 | 0.372433  |
| H | 3.947778  | 1.787037  | 3.087923  |
| H | 5.238853  | 2.842147  | 2.458755  |
| H | 5.174843  | 1.103518  | 2.005943  |
| H | 3.853010  | 3.239965  | -0.983389 |
| H | 5.154126  | 2.097848  | -0.587453 |
| H | 5.143065  | 3.735932  | 0.145094  |
| H | 2.122489  | 3.204161  | 2.298747  |
| H | 3.369002  | 4.350401  | 1.757096  |
| H | 2.093865  | 3.832022  | 0.631645  |
| H | 0.980441  | 1.979031  | 0.909210  |
| H | -0.982482 | -2.022741 | 0.835831  |
| H | -2.092678 | -3.313826 | 2.191040  |
| H | -2.103080 | -3.860883 | 0.495494  |
| H | -3.352058 | -4.433424 | 1.624024  |
| H | -3.898877 | -3.192921 | -1.048008 |
| H | -5.162687 | -3.743236 | 0.084970  |
| H | -5.189825 | -2.071866 | -0.567603 |
| H | -5.204294 | -2.961648 | 2.440484  |
| H | -5.149828 | -1.203243 | 2.070335  |
| H | -3.898382 | -1.937258 | 3.089487  |
| N | 7.941857  | 0.049826  | -0.829759 |

|   |            |           |           |
|---|------------|-----------|-----------|
| N | -7.981276  | -0.016130 | -0.646569 |
| C | 9.368498   | 0.133232  | -1.259079 |
| H | 9.530959   | -0.554577 | -2.097417 |
| H | 9.588916   | 1.160826  | -1.571729 |
| H | 10.012404  | -0.146668 | -0.416670 |
| C | 7.602975   | -1.350673 | -0.390004 |
| H | 6.540231   | -1.331635 | -0.088961 |
| H | 7.763434   | -2.031687 | -1.234196 |
| H | 8.258265   | -1.619345 | 0.447311  |
| C | 7.027811   | 0.429223  | -1.966641 |
| H | 5.997184   | 0.342018  | -1.570402 |
| H | 7.258864   | 1.457254  | -2.269911 |
| H | 7.201516   | -0.264198 | -2.798031 |
| C | 7.682012   | 0.981622  | 0.325182  |
| H | 8.336479   | 0.693900  | 1.156788  |
| H | 7.900601   | 2.007048  | 0.004418  |
| H | 6.614650   | 0.863423  | 0.584013  |
| C | -7.631513  | 1.361823  | -0.148038 |
| H | -8.267066  | 1.589604  | 0.716181  |
| H | -6.562086  | 1.328944  | 0.127025  |
| H | -7.811123  | 2.082505  | -0.954601 |
| C | -7.695238  | -1.002171 | 0.455954  |
| H | -7.921774  | -2.011132 | 0.091469  |
| H | -6.622096  | -0.895942 | 0.695343  |
| H | -8.330087  | -0.755086 | 1.315370  |
| C | -9.417535  | -0.079621 | -1.046205 |
| H | -9.599009  | 0.647565  | -1.846550 |
| H | -9.645711  | -1.091137 | -1.402650 |
| H | -10.041579 | 0.159138  | -0.176622 |
| C | -7.094048  | -0.339979 | -1.821248 |
| H | -7.332642  | -1.352388 | -2.168101 |
| H | -7.286596  | 0.392473  | -2.614124 |
| H | -6.054462  | -0.271330 | -1.445281 |

B3LYP/def2TZVP

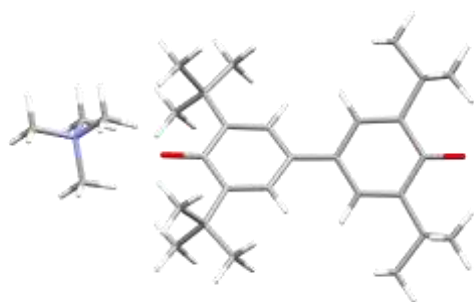

| <i>Element</i> | <i>X</i> | <i>Y</i> | <i>Z</i> |
|----------------|----------|----------|----------|
|----------------|----------|----------|----------|

|   |           |           |           |
|---|-----------|-----------|-----------|
| C | 0.955435  | -6.425823 | -2.004951 |
| C | 1.403035  | -5.554287 | -0.810098 |
| C | 2.788149  | -4.991957 | -1.175869 |
| C | 1.602333  | -6.416631 | 0.454570  |
| C | 0.352269  | -4.457821 | -0.548632 |
| C | 0.726244  | -3.117262 | -0.599011 |
| C | -0.164608 | -2.057270 | -0.411724 |
| C | 0.271704  | -0.647447 | -0.456504 |
| C | -0.332872 | 0.333477  | 0.340309  |
| C | 0.047492  | 1.666236  | 0.333209  |
| C | -0.646159 | 2.696953  | 1.239463  |
| C | -1.763857 | 2.081566  | 2.097670  |
| C | 0.381843  | 3.328832  | 2.203330  |
| C | -1.285945 | 3.806329  | 0.375925  |
| C | 1.127375  | 2.108707  | -0.531070 |
| O | 1.506857  | 3.327692  | -0.563096 |
| C | 1.752698  | 1.090779  | -1.357054 |
| C | 2.892617  | 1.502081  | -2.303763 |
| C | 2.386965  | 2.557858  | -3.311144 |
| C | 4.062920  | 2.093934  | -1.487666 |
| C | 3.450265  | 0.321536  | -3.115874 |
| C | 1.312297  | -0.221731 | -1.292332 |
| C | -1.497617 | -2.413590 | -0.189097 |
| C | -1.941038 | -3.731001 | -0.107578 |
| C | -3.439011 | -4.021091 | 0.108565  |
| C | -4.300845 | -2.747680 | 0.171584  |
| C | -3.648091 | -4.754102 | 1.451152  |
| C | -3.983664 | -4.861860 | -1.067682 |
| C | -1.005524 | -4.806872 | -0.252588 |
| O | -1.380979 | -6.071571 | -0.120765 |
| H | 0.993244  | -5.836453 | -2.923779 |
| H | 1.619702  | -7.289207 | -2.131296 |
| H | -0.067817 | -6.770039 | -1.877155 |
| H | 3.215926  | -4.398420 | -0.366247 |
| H | 3.472550  | -5.821651 | -1.378415 |
| H | 2.748626  | -4.365694 | -2.068261 |
| H | 0.653198  | -6.809094 | 0.801370  |
| H | 2.288780  | -7.249404 | 0.258783  |
| H | 2.028239  | -5.807866 | 1.255390  |
| H | 1.760846  | -2.861493 | -0.771867 |
| H | -1.117373 | 0.009825  | 1.011812  |
| H | -1.382836 | 1.308395  | 2.769372  |
| H | -2.220534 | 2.862826  | 2.713034  |
| H | -2.551289 | 1.638454  | 1.482986  |
| H | 1.188055  | 3.787952  | 1.634894  |
| H | 0.804517  | 2.561617  | 2.858408  |
| H | -0.097012 | 4.088797  | 2.832696  |
| H | -0.525386 | 4.277071  | -0.243616 |

|   |           |            |           |
|---|-----------|------------|-----------|
| H | -2.056214 | 3.380555   | -0.273498 |
| H | -1.757390 | 4.565326   | 1.012013  |
| H | 1.593020  | 2.134588   | -3.933059 |
| H | 3.201215  | 2.881176   | -3.970957 |
| H | 1.992608  | 3.419928   | -2.777112 |
| H | 3.713907  | 2.942478   | -0.902812 |
| H | 4.870678  | 2.419693   | -2.154242 |
| H | 4.467065  | 1.338792   | -0.807315 |
| H | 2.686515  | -0.131734  | -3.752464 |
| H | 4.257430  | 0.676297   | -3.764070 |
| H | 3.860167  | -0.458973  | -2.470083 |
| H | 1.765769  | -0.964600  | -1.935418 |
| H | -2.209529 | -1.606864  | -0.099597 |
| H | -4.229673 | -2.163839  | -0.747241 |
| H | -4.016437 | -2.102142  | 1.004103  |
| H | -5.349708 | -3.028207  | 0.309542  |
| H | -3.368690 | -4.098544  | 2.279080  |
| H | -4.698711 | -5.039997  | 1.583619  |
| H | -3.026552 | -5.640823  | 1.502101  |
| H | -5.012112 | -5.189053  | -0.873012 |
| H | -3.355236 | -5.729318  | -1.253173 |
| H | -3.990479 | -4.258430  | -1.978101 |
| N | -2.047994 | -8.864213  | 1.029176  |
| C | -0.985273 | -8.974955  | -0.032547 |
| H | -1.352021 | -9.634609  | -0.816883 |
| H | -0.812777 | -7.959956  | -0.402111 |
| H | -0.084908 | -9.386875  | 0.418201  |
| C | -3.273500 | -8.249529  | 0.405385  |
| H | -4.034775 | -8.134916  | 1.174044  |
| H | -2.962999 | -7.278294  | 0.009595  |
| H | -3.626872 | -8.913232  | -0.381672 |
| C | -2.366490 | -10.206096 | 1.588022  |
| H | -1.467570 | -10.631450 | 2.029763  |
| H | -3.136972 | -10.102180 | 2.349390  |
| H | -2.724186 | -10.850881 | 0.787453  |
| C | -1.549460 | -7.950062  | 2.119911  |
| H | -2.329199 | -7.857259  | 2.872999  |
| H | -0.652855 | -8.389080  | 2.552462  |
| H | -1.337276 | -6.988697  | 1.634552  |

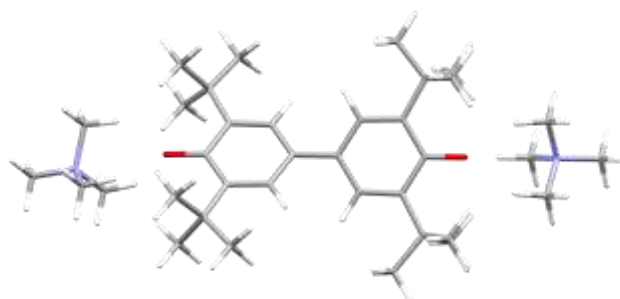

| <i>Element</i> | <i>X</i>  | <i>Y</i>  | <i>Z</i>  |
|----------------|-----------|-----------|-----------|
| C              | -4.387014 | 3.050026  | 0.788030  |
| C              | -3.521933 | 2.601922  | -0.411034 |
| C              | -2.526302 | 3.743356  | -0.683112 |
| C              | -4.381306 | 2.458567  | -1.685106 |
| C              | -2.833503 | 1.265657  | -0.076641 |
| C              | -1.445532 | 1.181170  | -0.076426 |
| C              | -0.747550 | 0.018263  | 0.249453  |
| C              | 0.730836  | -0.031588 | 0.231100  |
| C              | 1.420425  | -1.177114 | -0.166351 |
| C              | 2.807970  | -1.260719 | -0.202814 |
| C              | 3.487715  | -2.578999 | -0.616870 |
| C              | 2.485405  | -3.706606 | -0.920287 |
| C              | 4.317387  | -2.374145 | -1.902175 |
| C              | 4.380121  | -3.083689 | 0.538904  |
| C              | 3.597973  | -0.114520 | 0.153313  |
| O              | 4.908792  | -0.137121 | 0.074064  |
| C              | 2.896678  | 1.055669  | 0.605438  |
| C              | 3.675161  | 2.290085  | 1.097147  |
| C              | 4.570102  | 1.897457  | 2.293538  |
| C              | 4.521156  | 2.877667  | -0.052680 |
| C              | 2.760391  | 3.426197  | 1.587508  |
| C              | 1.506551  | 1.059572  | 0.623895  |
| C              | -1.514555 | -1.090934 | 0.607278  |
| C              | -2.904733 | -1.086924 | 0.621275  |
| C              | -3.672291 | -2.343963 | 1.071057  |
| C              | -2.747027 | -3.501803 | 1.484944  |
| C              | -4.545053 | -2.876119 | -0.085731 |
| C              | -4.539025 | -2.009742 | 2.305357  |
| C              | -3.615673 | 0.103237  | 0.242256  |
| O              | -4.927965 | 0.128888  | 0.194605  |
| H              | -3.743285 | 3.316627  | 1.629113  |
| H              | -4.985501 | 3.930991  | 0.530490  |
| H              | -5.044307 | 2.249991  | 1.118329  |
| H              | -1.894641 | 3.537756  | -1.549338 |
| H              | -3.080009 | 4.664049  | -0.887400 |
| H              | -1.877533 | 3.929801  | 0.174340  |
| H              | -5.084384 | 1.639759  | -1.582125 |

|   |           |           |           |
|---|-----------|-----------|-----------|
| H | -4.931505 | 3.383640  | -1.890989 |
| H | -3.741432 | 2.247607  | -2.545005 |
| H | -0.861020 | 2.044493  | -0.358845 |
| H | 0.829039  | -2.026204 | -0.476273 |
| H | 1.833939  | -3.459995 | -1.760756 |
| H | 3.033712  | -4.616117 | -1.181341 |
| H | 1.856593  | -3.934375 | -0.057963 |
| H | 5.023121  | -1.560836 | -1.776325 |
| H | 3.657860  | -2.122489 | -2.735879 |
| H | 4.862148  | -3.287956 | -2.164952 |
| H | 5.045344  | -2.300073 | 0.891911  |
| H | 3.755924  | -3.390733 | 1.380917  |
| H | 4.971984  | -3.950936 | 0.225543  |
| H | 3.946775  | 1.650545  | 3.155703  |
| H | 5.226107  | 2.727115  | 2.579751  |
| H | 5.172723  | 1.022868  | 2.062892  |
| H | 3.866997  | 3.253723  | -0.842638 |
| H | 5.162740  | 2.117116  | -0.483041 |
| H | 5.136882  | 3.711587  | 0.302738  |
| H | 2.131495  | 3.111340  | 2.421823  |
| H | 3.376027  | 4.261617  | 1.932520  |
| H | 2.110625  | 3.799304  | 0.793616  |
| H | 0.982538  | 1.933410  | 0.982323  |
| H | -0.982856 | -1.980685 | 0.911078  |
| H | -2.098776 | -3.227026 | 2.318607  |
| H | -2.116057 | -3.835991 | 0.659194  |
| H | -3.354962 | -4.353171 | 1.803622  |
| H | -3.909601 | -3.213439 | -0.907796 |
| H | -5.152834 | -3.726488 | 0.243413  |
| H | -5.196022 | -2.096135 | -0.464075 |
| H | -5.188678 | -2.852553 | 2.566533  |
| H | -5.146345 | -1.125421 | 2.131016  |
| H | -3.895733 | -1.804173 | 3.163696  |
| N | 7.907687  | 0.070636  | -0.835024 |
| N | -7.947252 | -0.036643 | -0.653615 |
| C | 9.328085  | 0.170444  | -1.274151 |
| H | 9.482144  | -0.478463 | -2.133741 |
| H | 9.545688  | 1.201041  | -1.546616 |
| H | 9.976712  | -0.139612 | -0.457418 |
| C | 7.577425  | -1.346573 | -0.447858 |
| H | 6.533627  | -1.348662 | -0.128761 |
| H | 7.722417  | -1.986859 | -1.315216 |
| H | 8.243980  | -1.647013 | 0.358129  |
| C | 6.988020  | 0.495746  | -1.950405 |
| H | 5.968010  | 0.399065  | -1.565540 |
| H | 7.219012  | 1.525890  | -2.212970 |
| H | 7.155997  | -0.158708 | -2.803032 |
| C | 7.664942  | 0.956725  | 0.357995  |

|   |            |           |           |
|---|------------|-----------|-----------|
| H | 8.330925   | 0.643977  | 1.159760  |
| H | 7.873425   | 1.986129  | 0.074903  |
| H | 6.616572   | 0.830427  | 0.633687  |
| C | -7.607310  | 1.360521  | -0.206599 |
| H | -8.254826  | 1.621536  | 0.628128  |
| H | -6.556391  | 1.347865  | 0.087936  |
| H | -7.772022  | 2.041642  | -1.038610 |
| C | -7.677398  | -0.978868 | 0.489522  |
| H | -7.892964  | -1.993605 | 0.162232  |
| H | -6.622845  | -0.865372 | 0.746573  |
| H | -8.324432  | -0.705356 | 1.320612  |
| C | -9.377508  | -0.116039 | -1.063968 |
| H | -9.551100  | 0.573315  | -1.887598 |
| H | -9.601946  | -1.132483 | -1.380492 |
| H | -10.006846 | 0.154075  | -0.218464 |
| C | -7.053937  | -0.407184 | -1.809154 |
| H | -7.291531  | -1.423659 | -2.115459 |
| H | -7.241279  | 0.287368  | -2.625242 |
| H | -6.025223  | -0.328530 | -1.443849 |

B3LYP/def2TZVP (CPCM – DME)

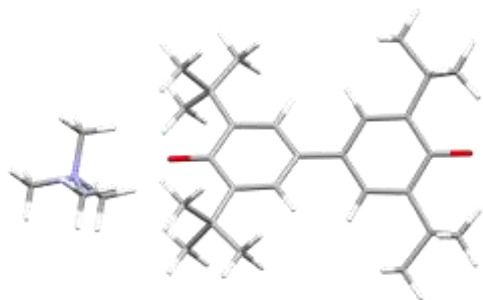

| <i>Element</i> | <i>X</i>  | <i>Y</i>  | <i>Z</i>  |
|----------------|-----------|-----------|-----------|
| C              | 1.014364  | -6.376806 | -1.967948 |
| C              | 1.433814  | -5.505506 | -0.763833 |
| C              | 2.829849  | -4.945614 | -1.088285 |
| C              | 1.586354  | -6.378782 | 0.499186  |
| C              | 0.381626  | -4.405256 | -0.526837 |
| C              | 0.749450  | -3.063816 | -0.582420 |
| C              | -0.146449 | -2.005161 | -0.398618 |
| C              | 0.287963  | -0.589849 | -0.458438 |
| C              | -0.312899 | 0.399909  | 0.329361  |
| C              | 0.060224  | 1.738785  | 0.302028  |
| C              | -0.647375 | 2.767609  | 1.203013  |
| C              | -1.756990 | 2.145417  | 2.067612  |
| C              | 0.369503  | 3.417201  | 2.166032  |
| C              | -1.307648 | 3.860591  | 0.335071  |
| C              | 1.132797  | 2.172501  | -0.572082 |

|   |           |           |           |
|---|-----------|-----------|-----------|
| O | 1.507570  | 3.402231  | -0.623778 |
| C | 1.761662  | 1.148924  | -1.384273 |
| C | 2.906108  | 1.535225  | -2.339326 |
| C | 2.410423  | 2.570186  | -3.371989 |
| C | 4.081773  | 2.131744  | -1.535520 |
| C | 3.459532  | 0.336649  | -3.128457 |
| C | 1.321915  | -0.167443 | -1.303310 |
| C | -1.478609 | -2.359954 | -0.159766 |
| C | -1.924186 | -3.675936 | -0.075887 |
| C | -3.415742 | -3.972337 | 0.171479  |
| C | -4.273363 | -2.699893 | 0.285384  |
| C | -3.588493 | -4.743866 | 1.496832  |
| C | -3.990397 | -4.793081 | -1.003422 |
| C | -0.987123 | -4.762447 | -0.237821 |
| O | -1.359215 | -6.004718 | -0.131356 |
| H | 1.033192  | -5.782060 | -2.885019 |
| H | 1.705651  | -7.215711 | -2.097761 |
| H | 0.007810  | -6.763570 | -1.833201 |
| H | 3.233979  | -4.349261 | -0.267656 |
| H | 3.518495  | -5.776448 | -1.262907 |
| H | 2.823314  | -4.326057 | -1.987373 |
| H | 0.627978  | -6.790362 | 0.797136  |
| H | 2.286579  | -7.201017 | 0.319605  |
| H | 1.976292  | -5.779400 | 1.326054  |
| H | 1.784861  | -2.810072 | -0.759837 |
| H | -1.096276 | 0.085654  | 1.005460  |
| H | -1.368328 | 1.384174  | 2.747860  |
| H | -2.221309 | 2.926215  | 2.675686  |
| H | -2.541444 | 1.688539  | 1.459994  |
| H | 1.176232  | 3.881701  | 1.603706  |
| H | 0.795355  | 2.661858  | 2.832530  |
| H | -0.118822 | 4.176131  | 2.786316  |
| H | -0.562826 | 4.339756  | -0.296140 |
| H | -2.079526 | 3.421601  | -0.303359 |
| H | -1.784105 | 4.617577  | 0.966867  |
| H | 1.618282  | 2.138648  | -3.990339 |
| H | 3.227522  | 2.872910  | -4.035248 |
| H | 2.018850  | 3.449002  | -2.864992 |
| H | 3.744728  | 2.990024  | -0.958727 |
| H | 4.887476  | 2.444857  | -2.207831 |
| H | 4.488880  | 1.384239  | -0.848772 |
| H | 2.697601  | -0.124230 | -3.761187 |
| H | 4.269225  | 0.676130  | -3.779706 |
| H | 3.865609  | -0.434645 | -2.470031 |
| H | 1.781155  | -0.915050 | -1.935608 |
| H | -2.192439 | -1.555351 | -0.055112 |
| H | -4.237292 | -2.098504 | -0.625246 |
| H | -3.962717 | -2.069640 | 1.121236  |

|   |           |            |           |
|---|-----------|------------|-----------|
| H | -5.315658 | -2.983094  | 0.453982  |
| H | -3.270747 | -4.122109  | 2.337954  |
| H | -4.637849 | -5.013409  | 1.654362  |
| H | -2.988659 | -5.647566  | 1.493817  |
| H | -5.025355 | -5.086799  | -0.800754 |
| H | -3.395808 | -5.685654  | -1.178922 |
| H | -3.985076 | -4.192840  | -1.917075 |
| N | -2.112165 | -9.051087  | 0.981295  |
| C | -1.037605 | -9.134045  | -0.067057 |
| H | -1.400273 | -9.752530  | -0.884327 |
| H | -0.832020 | -8.119770  | -0.401134 |
| H | -0.153429 | -9.584126  | 0.377203  |
| C | -3.329086 | -8.410632  | 0.373372  |
| H | -4.102364 | -8.342047  | 1.134332  |
| H | -3.035822 | -7.422684  | 0.026371  |
| H | -3.670719 | -9.031967  | -0.450819 |
| C | -2.446639 | -10.419159 | 1.484751  |
| H | -1.553952 | -10.862818 | 1.918218  |
| H | -3.224892 | -10.336730 | 2.239186  |
| H | -2.797028 | -11.024908 | 0.653017  |
| C | -1.622881 | -8.191341  | 2.113927  |
| H | -2.408609 | -8.124800  | 2.862120  |
| H | -0.737699 | -8.654590  | 2.542288  |
| H | -1.391853 | -7.211818  | 1.698297  |

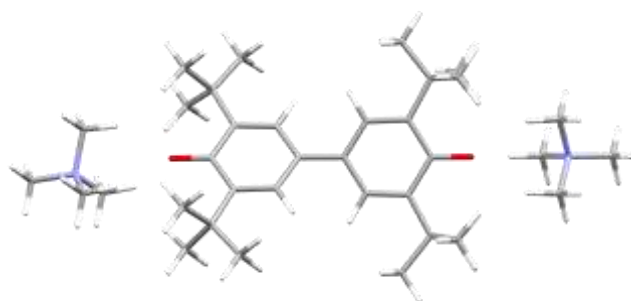

| <i>Element</i> | <i>X</i>  | <i>Y</i>  | <i>Z</i>  |
|----------------|-----------|-----------|-----------|
| C              | -4.402414 | 3.047453  | 0.857000  |
| C              | -3.534077 | 2.611074  | -0.343166 |
| C              | -2.540567 | 3.755337  | -0.610024 |
| C              | -4.405022 | 2.472608  | -1.609384 |
| C              | -2.841366 | 1.272907  | -0.023032 |
| C              | -1.452711 | 1.187191  | -0.023854 |
| C              | -0.748402 | 0.016541  | 0.276020  |
| C              | 0.732305  | -0.031143 | 0.257692  |
| C              | 1.428818  | -1.185649 | -0.114309 |
| C              | 2.817070  | -1.270532 | -0.149811 |
| C              | 3.501424  | -2.591394 | -0.549820 |

|   |           |           |           |
|---|-----------|-----------|-----------|
| C | 2.501354  | -3.722075 | -0.848209 |
| C | 4.342846  | -2.391794 | -1.827785 |
| C | 4.397118  | -3.084422 | 0.607543  |
| C | 3.614788  | -0.113579 | 0.185418  |
| O | 4.911803  | -0.141380 | 0.124237  |
| C | 2.902484  | 1.074734  | 0.595626  |
| C | 3.681779  | 2.332046  | 1.025338  |
| C | 4.585106  | 2.002903  | 2.233595  |
| C | 4.532159  | 2.854328  | -0.151991 |
| C | 2.766429  | 3.490670  | 1.457977  |
| C | 1.511556  | 1.073821  | 0.616266  |
| C | -1.519743 | -1.104803 | 0.599091  |
| C | -2.910776 | -1.105498 | 0.610696  |
| C | -3.680596 | -2.382430 | 0.997489  |
| C | -2.756104 | -3.559984 | 1.352641  |
| C | -4.558343 | -2.848043 | -0.183525 |
| C | -4.555474 | -2.112196 | 2.240783  |
| C | -3.631740 | 0.100746  | 0.274660  |
| O | -4.929809 | 0.130731  | 0.244981  |
| H | -3.766791 | 3.269237  | 1.718308  |
| H | -4.968577 | 3.952631  | 0.615552  |
| H | -5.095916 | 2.259930  | 1.139296  |
| H | -1.908388 | 3.556162  | -1.477929 |
| H | -3.096848 | 4.674505  | -0.811043 |
| H | -1.891481 | 3.942249  | 0.247953  |
| H | -5.121228 | 1.666096  | -1.494611 |
| H | -4.945954 | 3.402779  | -1.810526 |
| H | -3.776380 | 2.254667  | -2.476774 |
| H | -0.872540 | 2.060750  | -0.285206 |
| H | 0.842254  | -2.045972 | -0.403786 |
| H | 1.849328  | -3.481801 | -1.690652 |
| H | 3.052312  | -4.630218 | -1.105986 |
| H | 1.872237  | -3.950336 | 0.014625  |
| H | 5.061970  | -1.591324 | -1.691054 |
| H | 3.694377  | -2.132798 | -2.668894 |
| H | 4.878449  | -3.310929 | -2.085857 |
| H | 5.097420  | -2.310979 | 0.911173  |
| H | 3.781519  | -3.347668 | 1.471716  |
| H | 4.957025  | -3.976645 | 0.309837  |
| H | 3.971088  | 1.758388  | 3.104368  |
| H | 5.210410  | 2.862601  | 2.494553  |
| H | 5.224818  | 1.151266  | 2.018424  |
| H | 3.883100  | 3.179588  | -0.969289 |
| H | 5.188103  | 2.075388  | -0.525594 |
| H | 5.138148  | 3.711393  | 0.158644  |
| H | 2.142206  | 3.222725  | 2.312895  |
| H | 3.382392  | 4.344102  | 1.752897  |
| H | 2.111599  | 3.819981  | 0.648465  |

|   |            |           |           |
|---|------------|-----------|-----------|
| H | 0.990157   | 1.962018  | 0.943859  |
| H | -0.991382  | -2.007417 | 0.871472  |
| H | -2.112072  | -3.333058 | 2.204733  |
| H | -2.120408  | -3.849674 | 0.513279  |
| H | -3.365537  | -4.426938 | 1.620442  |
| H | -3.928595  | -3.133317 | -1.030333 |
| H | -5.157442  | -3.719376 | 0.099563  |
| H | -5.222341  | -2.052426 | -0.503975 |
| H | -5.175036  | -2.983784 | 2.474586  |
| H | -5.199530  | -1.251565 | 2.081654  |
| H | -3.921290  | -1.909440 | 3.107819  |
| N | 8.107737   | 0.053735  | -0.827080 |
| N | -8.147055  | -0.020254 | -0.640231 |
| C | 9.538599   | 0.137134  | -1.255017 |
| H | 9.696429   | -0.540517 | -2.090089 |
| H | 9.756867   | 1.157987  | -1.557924 |
| H | 10.173256  | -0.147039 | -0.419637 |
| C | 7.778911   | -1.347168 | -0.391258 |
| H | 6.733183   | -1.357217 | -0.093454 |
| H | 7.951850   | -2.020531 | -1.226975 |
| H | 8.427502   | -1.611017 | 0.440443  |
| C | 7.206367   | 0.433624  | -1.969098 |
| H | 6.181219   | 0.359349  | -1.610433 |
| H | 7.442609   | 1.450152  | -2.273049 |
| H | 7.383907   | -0.253092 | -2.792803 |
| C | 7.856980   | 0.988109  | 0.323650  |
| H | 8.509126   | 0.705473  | 1.146233  |
| H | 8.080130   | 2.002281  | 0.002148  |
| H | 6.810103   | 0.889301  | 0.599813  |
| C | -7.807429  | 1.358286  | -0.145378 |
| H | -8.436409  | 1.581527  | 0.712852  |
| H | -6.755070  | 1.354604  | 0.128232  |
| H | -7.999328  | 2.070910  | -0.943557 |
| C | -7.870198  | -1.008673 | 0.458173  |
| H | -8.101309  | -2.006359 | 0.093599  |
| H | -6.817143  | -0.922659 | 0.714409  |
| H | -8.502933  | -0.766231 | 1.308284  |
| C | -9.587502  | -0.083803 | -1.038379 |
| H | -9.764280  | 0.633082  | -1.836059 |
| H | -9.813306  | -1.089053 | -1.384819 |
| H | -10.202457 | 0.159570  | -0.175821 |
| C | -7.272625  | -0.344358 | -1.819773 |
| H | -7.516419  | -1.345247 | -2.166630 |
| H | -7.468838  | 0.381024  | -2.605208 |
| H | -6.239393  | -0.286822 | -1.481827 |

# Hydrogen

*Singly Reduced*

PBE/def2TZVP

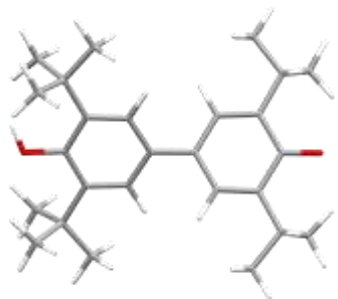

| <i>Element</i> | <i>X</i>  | <i>Y</i>  | <i>Z</i>  |
|----------------|-----------|-----------|-----------|
| C              | 0.183649  | -4.316086 | 2.180970  |
| C              | 1.419680  | -3.509771 | 2.621832  |
| C              | 1.266222  | -3.285164 | 4.147075  |
| C              | 2.647110  | -4.402907 | 2.309766  |
| C              | 1.519684  | -2.161382 | 1.875054  |
| C              | 0.558975  | -1.800202 | 0.933380  |
| C              | 0.590858  | -0.577465 | 0.237099  |
| C              | -0.440506 | -0.232695 | -0.739515 |
| C              | -1.191230 | -1.242735 | -1.395489 |
| C              | -2.169544 | -0.968271 | -2.324704 |
| C              | -2.945880 | -2.084389 | -3.028553 |
| C              | -2.498663 | -3.481131 | -2.564811 |
| C              | -4.455110 | -1.946633 | -2.716042 |
| C              | -2.718247 | -1.999774 | -4.556366 |
| C              | -2.463436 | 0.443467  | -2.650638 |
| O              | -3.351908 | 0.739957  | -3.488632 |
| C              | -1.684944 | 1.496875  | -1.965290 |
| C              | -1.973148 | 2.969301  | -2.269437 |
| C              | -1.069294 | 3.914596  | -1.459942 |
| C              | -1.722121 | 3.249998  | -3.770359 |
| C              | -3.441634 | 3.301398  | -1.913674 |
| C              | -0.719364 | 1.121687  | -1.057952 |
| C              | 1.655889  | 0.300074  | 0.521393  |
| C              | 2.659137  | 0.008808  | 1.440471  |
| C              | 3.810187  | 1.000463  | 1.698285  |
| C              | 3.670764  | 2.269462  | 0.838075  |
| C              | 5.167057  | 0.352735  | 1.339261  |
| C              | 3.804428  | 1.450724  | 3.177378  |
| C              | 2.573471  | -1.238220 | 2.116149  |
| H              | 0.156985  | -5.265373 | 2.735175  |
| H              | -0.753247 | -3.781690 | 2.393485  |

|   |           |           |           |
|---|-----------|-----------|-----------|
| H | 0.211801  | -4.558638 | 1.108937  |
| H | 2.097399  | -2.741209 | 4.619939  |
| H | 0.356214  | -2.703902 | 4.352553  |
| H | 1.179071  | -4.253666 | 4.661596  |
| H | 2.549623  | -5.367670 | 2.829358  |
| H | 3.618666  | -3.977084 | 2.602799  |
| H | 2.706807  | -4.598327 | 1.229742  |
| H | -0.275389 | -2.472440 | 0.749954  |
| H | -0.945904 | -2.280596 | -1.174977 |
| H | -1.437655 | -3.672144 | -2.787285 |
| H | -2.661907 | -3.631182 | -1.486357 |
| H | -3.089119 | -4.241396 | -3.096383 |
| H | -5.009066 | -2.762499 | -3.205803 |
| H | -4.845173 | -0.988607 | -3.076609 |
| H | -4.635133 | -2.016729 | -1.632459 |
| H | -3.072554 | -1.042539 | -4.954234 |
| H | -3.263550 | -2.815104 | -5.056576 |
| H | -1.649620 | -2.109082 | -4.795991 |
| H | -1.314420 | 4.954564  | -1.719868 |
| H | -1.217002 | 3.802073  | -0.374978 |
| H | -0.002531 | 3.761086  | -1.684545 |
| H | -2.382067 | 2.643033  | -4.399698 |
| H | -0.677292 | 3.029473  | -4.036986 |
| H | -1.909212 | 4.314098  | -3.982496 |
| H | -3.632647 | 3.118922  | -0.845229 |
| H | -4.136565 | 2.694902  | -2.504767 |
| H | -3.638802 | 4.365427  | -2.116784 |
| H | -0.164337 | 1.892159  | -0.524976 |
| H | 1.712469  | 1.233911  | -0.032431 |
| H | 4.509632  | 2.944329  | 1.061010  |
| H | 3.703717  | 2.047337  | -0.238949 |
| H | 2.741039  | 2.817080  | 1.053613  |
| H | 5.377080  | -0.531008 | 1.951625  |
| H | 5.977823  | 1.080296  | 1.497219  |
| H | 5.182658  | 0.053439  | 0.280655  |
| H | 2.848977  | 1.934854  | 3.428850  |
| H | 4.609099  | 2.183103  | 3.344026  |
| H | 3.958139  | 0.611720  | 3.864675  |
| O | 3.564575  | -1.510361 | 3.020799  |
| H | 3.405847  | -2.389422 | 3.404586  |

B3LYP/def2TZVP

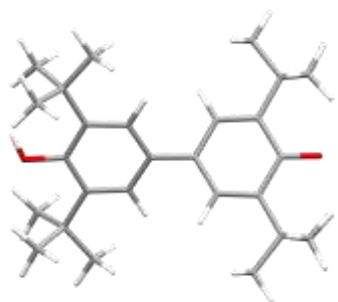

| <i>Element</i> | <i>X</i>  | <i>Y</i>  | <i>Z</i>  |
|----------------|-----------|-----------|-----------|
| C              | 0.119402  | -4.261709 | 2.253805  |
| C              | 1.372739  | -3.469550 | 2.667996  |
| C              | 1.235818  | -3.209557 | 4.187072  |
| C              | 2.579751  | -4.390322 | 2.367096  |
| C              | 1.496220  | -2.138588 | 1.894405  |
| C              | 0.539582  | -1.778631 | 0.954684  |
| C              | 0.592025  | -0.579054 | 0.237464  |
| C              | -0.440632 | -0.233526 | -0.740335 |
| C              | -1.161279 | -1.241683 | -1.420628 |
| C              | -2.134713 | -0.970201 | -2.344531 |
| C              | -2.886917 | -2.083270 | -3.079394 |
| C              | -2.417217 | -3.481206 | -2.644023 |
| C              | -4.398641 | -1.983681 | -2.773863 |
| C              | -2.650356 | -1.963822 | -4.601620 |
| C              | -2.451201 | 0.439091  | -2.638943 |
| O              | -3.331817 | 0.733191  | -3.469124 |
| C              | -1.702694 | 1.492258  | -1.929522 |
| C              | -2.020962 | 2.963969  | -2.207731 |
| C              | -1.142871 | 3.911254  | -1.373536 |
| C              | -1.764321 | 3.282181  | -3.698216 |
| C              | -3.495605 | 3.260594  | -1.854290 |
| C              | -0.742822 | 1.117062  | -1.027746 |
| C              | 1.669447  | 0.278799  | 0.492617  |
| C              | 2.668869  | -0.012830 | 1.408011  |
| C              | 3.841615  | 0.961038  | 1.638177  |
| C              | 3.723942  | 2.214902  | 0.753954  |
| C              | 5.181737  | 0.280708  | 1.284230  |
| C              | 3.855512  | 1.442600  | 3.105448  |
| C              | 2.563566  | -1.236513 | 2.107174  |
| H              | 0.078536  | -5.191263 | 2.823850  |
| H              | -0.798548 | -3.709568 | 2.459606  |
| H              | 0.135405  | -4.525776 | 1.195442  |
| H              | 2.074662  | -2.671864 | 4.630891  |
| H              | 0.343585  | -2.613829 | 4.385322  |
| H              | 1.139489  | -4.156829 | 4.721477  |
| H              | 2.474392  | -5.332988 | 2.907802  |

|   |           |           |           |
|---|-----------|-----------|-----------|
| H | 3.550117  | -3.971576 | 2.638225  |
| H | 2.624547  | -4.612035 | 1.299805  |
| H | -0.301680 | -2.430311 | 0.789128  |
| H | -0.895058 | -2.267055 | -1.217937 |
| H | -1.359615 | -3.645311 | -2.861592 |
| H | -2.583424 | -3.655766 | -1.578607 |
| H | -2.984871 | -4.235298 | -3.191566 |
| H | -4.928665 | -2.796435 | -3.276479 |
| H | -4.808502 | -1.037434 | -3.115727 |
| H | -4.580556 | -2.076689 | -1.700479 |
| H | -3.020929 | -1.017261 | -4.985148 |
| H | -3.167040 | -2.776338 | -5.118297 |
| H | -1.585219 | -2.042301 | -4.831975 |
| H | -1.405008 | 4.943381  | -1.611582 |
| H | -1.294539 | 3.773952  | -0.300753 |
| H | -0.080326 | 3.784422  | -1.592396 |
| H | -2.403104 | 2.686697  | -4.344469 |
| H | -0.721604 | 3.085714  | -3.958880 |
| H | -1.964493 | 4.339724  | -3.886885 |
| H | -3.687792 | 3.048500  | -0.799846 |
| H | -4.173803 | 2.664837  | -2.458905 |
| H | -3.709173 | 4.317924  | -2.028927 |
| H | -0.208497 | 1.874891  | -0.476961 |
| H | 1.735895  | 1.190708  | -0.076659 |
| H | 4.571336  | 2.872035  | 0.955416  |
| H | 3.744588  | 1.971684  | -0.310066 |
| H | 2.814248  | 2.781211  | 0.963008  |
| H | 5.376479  | -0.586476 | 1.909179  |
| H | 6.002292  | 0.989353  | 1.419064  |
| H | 5.182468  | -0.039506 | 0.240010  |
| H | 2.917831  | 1.946423  | 3.350217  |
| H | 4.668966  | 2.157248  | 3.251193  |
| H | 3.995956  | 0.621801  | 3.803204  |
| O | 3.555608  | -1.502150 | 3.007721  |
| H | 3.414377  | -2.356089 | 3.421945  |

B3LYP/def2TZVP (CPCM – DME)

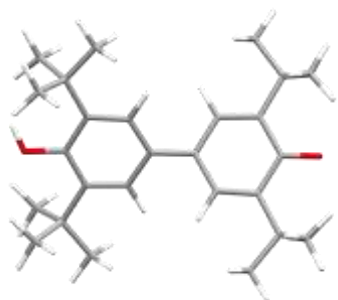

| <i>Element</i> | <i>X</i>  | <i>Y</i>  | <i>Z</i>  |
|----------------|-----------|-----------|-----------|
| C              | 0.156566  | -4.297140 | 2.192180  |
| C              | 1.398125  | -3.496743 | 2.625740  |
| C              | 1.252363  | -3.263897 | 4.148335  |
| C              | 2.619321  | -4.393825 | 2.311560  |
| C              | 1.506460  | -2.151309 | 1.875843  |
| C              | 0.550554  | -1.789628 | 0.937642  |
| C              | 0.588917  | -0.576787 | 0.237796  |
| C              | -0.441870 | -0.232183 | -0.738714 |
| C              | -1.181807 | -1.239578 | -1.401742 |
| C              | -2.154710 | -0.968054 | -2.325879 |
| C              | -2.923896 | -2.087330 | -3.035683 |
| C              | -2.466895 | -3.482667 | -2.578112 |
| C              | -4.432105 | -1.968235 | -2.720784 |
| C              | -2.695767 | -2.001474 | -4.561294 |
| C              | -2.452629 | 0.439987  | -2.641570 |
| O              | -3.334440 | 0.734617  | -3.475456 |
| C              | -1.686648 | 1.492441  | -1.951222 |
| C              | -1.979968 | 2.967004  | -2.247562 |
| C              | -1.084843 | 3.910500  | -1.426761 |
| C              | -1.717693 | 3.263677  | -3.741306 |
| C              | -3.447675 | 3.296116  | -1.894765 |
| C              | -0.728247 | 1.118410  | -1.047808 |
| C              | 1.654124  | 0.293509  | 0.511462  |
| C              | 2.652592  | 0.000888  | 1.426428  |
| C              | 3.810084  | 0.988461  | 1.676376  |
| C              | 3.679049  | 2.253077  | 0.809241  |
| C              | 5.162206  | 0.333291  | 1.319976  |
| C              | 3.809317  | 1.450027  | 3.150256  |
| C              | 2.561472  | -1.236543 | 2.107664  |
| H              | 0.128700  | -5.236509 | 2.746194  |
| H              | -0.769335 | -3.761182 | 2.405711  |
| H              | 0.179637  | -4.541806 | 1.129231  |
| H              | 2.084260  | -2.728153 | 4.606794  |
| H              | 0.351322  | -2.683357 | 4.352706  |
| H              | 1.165283  | -4.222675 | 4.662591  |
| H              | 2.524291  | -5.345416 | 2.837519  |
| H              | 3.582436  | -3.967095 | 2.594449  |
| H              | 2.667582  | -4.597985 | 1.240762  |
| H              | -0.278285 | -2.453217 | 0.759200  |
| H              | -0.933873 | -2.265761 | -1.183298 |
| H              | -1.412937 | -3.662071 | -2.800019 |
| H              | -2.625727 | -3.635434 | -1.508628 |
| H              | -3.047953 | -4.238899 | -3.108483 |
| H              | -4.974165 | -2.781518 | -3.209308 |
| H              | -4.835583 | -1.021774 | -3.070258 |
| H              | -4.605936 | -2.046461 | -1.644970 |
| H              | -3.054564 | -1.057493 | -4.962555 |

|   |           |           |           |
|---|-----------|-----------|-----------|
| H | -3.226649 | -2.816995 | -5.058282 |
| H | -1.633133 | -2.099632 | -4.795529 |
| H | -1.330693 | 4.943227  | -1.679424 |
| H | -1.237814 | 3.789264  | -0.352452 |
| H | -0.025104 | 3.761652  | -1.643814 |
| H | -2.361377 | 2.667162  | -4.382059 |
| H | -0.676776 | 3.051648  | -3.996699 |
| H | -1.905223 | 4.320929  | -3.943679 |
| H | -3.639340 | 3.103665  | -0.836499 |
| H | -4.139565 | 2.703272  | -2.486943 |
| H | -3.642433 | 4.354312  | -2.084997 |
| H | -0.180750 | 1.878755  | -0.514597 |
| H | 1.711678  | 1.215989  | -0.041063 |
| H | 4.516175  | 2.918494  | 1.025989  |
| H | 3.708996  | 2.024644  | -0.257812 |
| H | 2.759498  | 2.802291  | 1.020343  |
| H | 5.366117  | -0.541308 | 1.931831  |
| H | 5.970532  | 1.052556  | 1.471156  |
| H | 5.173299  | 0.030720  | 0.270427  |
| H | 2.864130  | 1.939869  | 3.395017  |
| H | 4.613476  | 2.172197  | 3.309549  |
| H | 3.954858  | 0.621404  | 3.837930  |
| O | 3.551147  | -1.499410 | 3.005432  |
| H | 3.428351  | -2.360652 | 3.413693  |

*Doubly Reduced*

PBE/def2TZVP

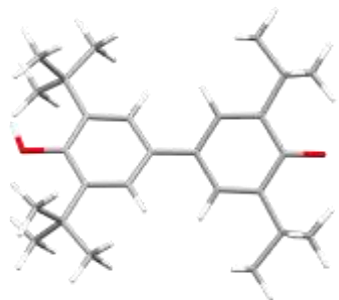

| <i>Element</i> | <i>X</i>  | <i>Y</i>  | <i>Z</i>  |
|----------------|-----------|-----------|-----------|
| C              | 2.857265  | 2.311698  | -3.293188 |
| C              | 2.714150  | 0.825548  | -2.893384 |
| C              | 1.739638  | 0.167531  | -3.884261 |
| C              | 4.081678  | 0.120746  | -3.045354 |
| C              | 2.240486  | 0.722715  | -1.434266 |
| C              | 1.044343  | 0.096689  | -1.110734 |
| C              | 0.553599  | -0.009115 | 0.207547  |
| C              | -0.719707 | -0.673284 | 0.506623  |
| C              | -1.265276 | -1.662322 | -0.336792 |
| C              | -2.475459 | -2.313838 | -0.086013 |

|   |           |           |           |
|---|-----------|-----------|-----------|
| C | -3.007429 | -3.389369 | -1.055761 |
| C | -2.070716 | -3.594928 | -2.260034 |
| C | -3.125967 | -4.752221 | -0.336064 |
| C | -4.382625 | -2.965797 | -1.620834 |
| C | -3.177810 | -1.962300 | 1.090809  |
| O | -4.382269 | -2.625283 | 1.329288  |
| C | -2.683150 | -0.976733 | 1.978782  |
| C | -3.447740 | -0.565642 | 3.257675  |
| C | -4.841119 | 0.012927  | 2.906663  |
| C | -2.713603 | 0.538465  | 4.042037  |
| C | -3.572370 | -1.762360 | 4.234665  |
| C | -1.470722 | -0.358355 | 1.655069  |
| C | 1.349500  | 0.558761  | 1.224440  |
| C | 2.559046  | 1.196189  | 0.984334  |
| C | 3.393413  | 1.778087  | 2.137195  |
| C | 4.779224  | 1.094823  | 2.176642  |
| C | 3.578294  | 3.298515  | 1.927316  |
| C | 2.734238  | 1.575690  | 3.511693  |
| C | 3.067216  | 1.310903  | -0.381672 |
| O | 4.176240  | 1.894223  | -0.641487 |
| H | 3.231430  | 2.398405  | -4.328413 |
| H | 3.555703  | 2.812561  | -2.610817 |
| H | 1.880133  | 2.817272  | -3.237401 |
| H | 1.609758  | -0.907150 | -3.680623 |
| H | 0.746245  | 0.642580  | -3.862250 |
| H | 2.137567  | 0.269467  | -4.906955 |
| H | 4.451322  | 0.215997  | -4.081475 |
| H | 4.807806  | 0.570779  | -2.356601 |
| H | 3.985952  | -0.951546 | -2.811794 |
| H | 0.424672  | -0.304755 | -1.915087 |
| H | -0.689342 | -1.943849 | -1.215792 |
| H | -1.072650 | -3.939558 | -1.952475 |
| H | -2.501219 | -4.362357 | -2.921981 |
| H | -1.948320 | -2.674020 | -2.848734 |
| H | -3.489467 | -5.520213 | -1.038685 |
| H | -3.817347 | -4.702643 | 0.512940  |
| H | -2.141080 | -5.070940 | 0.037412  |
| H | -4.292573 | -2.012616 | -2.163448 |
| H | -4.751018 | -3.727403 | -2.327845 |
| H | -5.127120 | -2.840571 | -0.826331 |
| H | -4.694723 | -2.364746 | 2.209380  |
| H | -5.483941 | -0.674224 | 2.338095  |
| H | -5.380872 | 0.295225  | 3.824935  |
| H | -4.721141 | 0.913308  | 2.287167  |
| H | -1.714889 | 0.214719  | 4.367113  |
| H | -2.598641 | 1.454105  | 3.445457  |

|   |           |           |          |
|---|-----------|-----------|----------|
| H | -3.296466 | 0.792216  | 4.941189 |
| H | -4.100679 | -2.639412 | 3.828995 |
| H | -4.107388 | -1.456131 | 5.147812 |
| H | -2.570471 | -2.112965 | 4.520940 |
| H | -1.088245 | 0.428151  | 2.301736 |
| H | 1.005712  | 0.451806  | 2.255357 |
| H | 5.401561  | 1.529972  | 2.978266 |
| H | 4.667416  | 0.016994  | 2.374798 |
| H | 5.284109  | 1.227798  | 1.211379 |
| H | 2.601567  | 3.807681  | 1.946765 |
| H | 4.054778  | 3.481570  | 0.955894 |
| H | 4.205479  | 3.725202  | 2.729750 |
| H | 2.601717  | 0.508999  | 3.751930 |
| H | 1.749147  | 2.065235  | 3.570736 |
| H | 3.375899  | 2.017977  | 4.291010 |

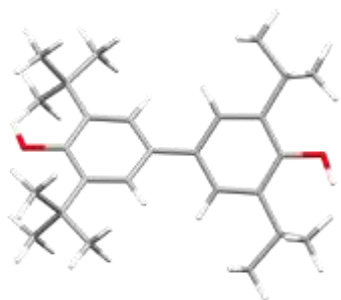

| <i>Element</i> | <i>X</i>  | <i>Y</i>  | <i>Z</i>  |
|----------------|-----------|-----------|-----------|
| C              | 2.711812  | 2.541293  | -3.246336 |
| C              | 2.597188  | 1.036060  | -2.898110 |
| C              | 1.551706  | 0.452113  | -3.866818 |
| C              | 3.921757  | 0.291212  | -3.201929 |
| C              | 2.185341  | 0.841976  | -1.421827 |
| C              | 0.981143  | 0.207474  | -1.099349 |
| C              | 0.558399  | 0.009881  | 0.220038  |
| C              | -0.722303 | -0.667677 | 0.519507  |
| C              | -1.198303 | -1.710805 | -0.286175 |
| C              | -2.404121 | -2.372113 | -0.041916 |
| C              | -2.879674 | -3.515793 | -0.959551 |
| C              | -1.887642 | -3.777700 | -2.107219 |
| C              | -3.005696 | -4.831398 | -0.158008 |
| C              | -4.235461 | -3.151493 | -1.607023 |
| C              | -3.154634 | -1.951942 | 1.083910  |
| O              | -4.340765 | -2.615750 | 1.313084  |
| C              | -2.717245 | -0.904972 | 1.933345  |
| C              | -3.537770 | -0.438512 | 3.156395  |
| C              | -4.920572 | 0.106008  | 2.718807  |

|   |           |           |           |
|---|-----------|-----------|-----------|
| C | -2.843556 | 0.713189  | 3.907445  |
| C | -3.691174 | -1.586617 | 4.185915  |
| C | -1.502454 | -0.287593 | 1.617431  |
| C | 1.390111  | 0.478072  | 1.246132  |
| C | 2.603139  | 1.127726  | 1.006341  |
| C | 3.481245  | 1.620758  | 2.173413  |
| C | 4.856927  | 0.916537  | 2.146206  |
| C | 3.663067  | 3.153938  | 2.093455  |
| C | 2.841639  | 1.313036  | 3.539456  |
| C | 2.987304  | 1.299684  | -0.346488 |
| O | 4.187842  | 1.940206  | -0.566735 |
| H | 2.997857  | 2.663747  | -4.301982 |
| H | 3.444352  | 3.097598  | -2.643258 |
| H | 1.742373  | 3.036383  | -3.093032 |
| H | 1.416746  | -0.629248 | -3.721263 |
| H | 0.573654  | 0.942230  | -3.759195 |
| H | 1.890948  | 0.609482  | -4.901190 |
| H | 4.195180  | 0.425261  | -4.259464 |
| H | 4.784394  | 0.616493  | -2.601292 |
| H | 3.799802  | -0.784560 | -3.011469 |
| H | 0.324196  | -0.126980 | -1.900100 |
| H | -0.580252 | -2.031535 | -1.122945 |
| H | -0.897715 | -4.084272 | -1.737878 |
| H | -2.274551 | -4.594555 | -2.733870 |
| H | -1.760787 | -2.896114 | -2.753381 |
| H | -3.321631 | -5.646866 | -0.827171 |
| H | -3.738494 | -4.748469 | 0.652089  |
| H | -2.034952 | -5.108554 | 0.279617  |
| H | -4.140868 | -2.232140 | -2.204286 |
| H | -4.556355 | -3.961804 | -2.280087 |
| H | -5.019274 | -2.996665 | -0.857583 |
| H | -4.747726 | -2.253193 | 2.116624  |
| H | -5.549480 | -0.617799 | 2.179947  |
| H | -5.489870 | 0.441384  | 3.598937  |
| H | -4.789221 | 0.965518  | 2.046188  |
| H | -1.856307 | 0.416995  | 4.290005  |
| H | -2.718045 | 1.601035  | 3.271553  |
| H | -3.461077 | 1.005600  | 4.769384  |
| H | -4.198951 | -2.485450 | 3.805158  |
| H | -4.264137 | -1.236527 | 5.057842  |
| H | -2.701016 | -1.914115 | 4.533430  |
| H | -1.152056 | 0.542338  | 2.228233  |
| H | 1.081316  | 0.298950  | 2.274528  |
| H | 5.466862  | 1.256811  | 2.997544  |
| H | 4.731889  | -0.173222 | 2.232611  |
| H | 5.407126  | 1.128745  | 1.222964  |

|   |          |          |           |
|---|----------|----------|-----------|
| H | 2.686954 | 3.659386 | 2.144495  |
| H | 4.161782 | 3.459915 | 1.167358  |
| H | 4.270098 | 3.501764 | 2.943821  |
| H | 2.709639 | 0.232943 | 3.701717  |
| H | 1.864793 | 1.805286 | 3.658932  |
| H | 3.501331 | 1.688988 | 4.335137  |
| H | 4.347042 | 1.978108 | -1.523793 |

B3LYP/def2TZVP

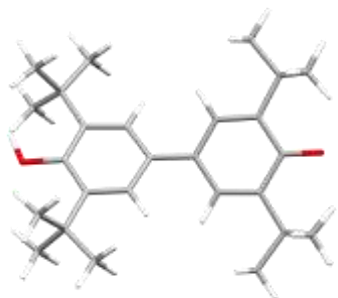

| Element | X         | Y         | Z         |
|---------|-----------|-----------|-----------|
| C       | 2.818760  | 2.382644  | -3.258530 |
| C       | 2.671255  | 0.889969  | -2.891472 |
| C       | 1.678537  | 0.266957  | -3.886809 |
| C       | 4.027623  | 0.177407  | -3.086602 |
| C       | 2.214861  | 0.750925  | -1.430018 |
| C       | 1.024007  | 0.129013  | -1.106969 |
| C       | 0.554138  | -0.008389 | 0.208657  |
| C       | -0.720776 | -0.671643 | 0.507444  |
| C       | -1.248024 | -1.674413 | -0.318301 |
| C       | -2.450767 | -2.326478 | -0.064755 |
| C       | -2.966395 | -3.427265 | -1.014722 |
| C       | -2.021602 | -3.649906 | -2.208892 |
| C       | -3.075575 | -4.774706 | -0.268775 |
| C       | -4.340410 | -3.030711 | -1.597401 |
| C       | -3.161550 | -1.955694 | 1.091978  |
| O       | -4.365225 | -2.613608 | 1.327072  |
| C       | -2.690653 | -0.947760 | 1.955671  |
| C       | -3.479149 | -0.500728 | 3.207126  |
| C       | -4.880388 | 0.021541  | 2.814354  |
| C       | -2.781614 | 0.652133  | 3.952635  |
| C       | -3.588665 | -1.655268 | 4.232000  |
| C       | -1.481189 | -0.335184 | 1.634072  |
| C       | 1.363905  | 0.521883  | 1.225353  |
| C       | 2.569728  | 1.153534  | 0.988559  |
| C       | 3.425169  | 1.698868  | 2.143635  |
| C       | 4.804473  | 1.004652  | 2.152433  |
| C       | 3.618841  | 3.222232  | 1.978101  |

|   |           |           |           |
|---|-----------|-----------|-----------|
| C | 2.783506  | 1.465370  | 3.521424  |
| C | 3.055812  | 1.299948  | -0.375944 |
| O | 4.157892  | 1.876980  | -0.633325 |
| H | 3.167959  | 2.490041  | -4.291943 |
| H | 3.528513  | 2.863500  | -2.589056 |
| H | 1.853677  | 2.889643  | -3.171658 |
| H | 1.544609  | -0.803532 | -3.712373 |
| H | 0.697205  | 0.745215  | -3.838322 |
| H | 2.059225  | 0.392555  | -4.904446 |
| H | 4.374227  | 0.291215  | -4.120215 |
| H | 4.770121  | 0.596593  | -2.411289 |
| H | 3.925742  | -0.891357 | -2.878292 |
| H | 0.394097  | -0.244779 | -1.902742 |
| H | -0.664491 | -1.965051 | -1.176378 |
| H | -1.030266 | -3.976926 | -1.891096 |
| H | -2.437344 | -4.428662 | -2.852873 |
| H | -1.905625 | -2.747458 | -2.811256 |
| H | -3.417684 | -5.556577 | -0.953651 |
| H | -3.773312 | -4.716556 | 0.562597  |
| H | -2.098577 | -5.070168 | 0.120478  |
| H | -4.257742 | -2.093236 | -2.152103 |
| H | -4.691548 | -3.802866 | -2.288751 |
| H | -5.087496 | -2.901848 | -0.818552 |
| H | -4.594646 | -2.532398 | 2.254244  |
| H | -5.478752 | -0.710408 | 2.274463  |
| H | -5.436222 | 0.324582  | 3.706345  |
| H | -4.778741 | 0.892717  | 2.164874  |
| H | -1.792423 | 0.366592  | 4.312159  |
| H | -2.672143 | 1.533071  | 3.319702  |
| H | -3.383201 | 0.936435  | 4.819461  |
| H | -4.120619 | -2.540309 | 3.873168  |
| H | -4.115862 | -1.318170 | 5.128460  |
| H | -2.592204 | -1.990716 | 4.523303  |
| H | -1.111462 | 0.461676  | 2.257818  |
| H | 1.031829  | 0.390671  | 2.246394  |
| H | 5.430227  | 1.406040  | 2.957909  |
| H | 4.685081  | -0.069719 | 2.318068  |
| H | 5.305601  | 1.158410  | 1.199334  |
| H | 2.652363  | 3.732348  | 2.020763  |
| H | 4.085895  | 3.436794  | 1.019512  |
| H | 4.248489  | 3.617728  | 2.783479  |
| H | 2.646533  | 0.402050  | 3.733064  |
| H | 1.811466  | 1.957781  | 3.606373  |
| H | 3.433721  | 1.877661  | 4.298313  |

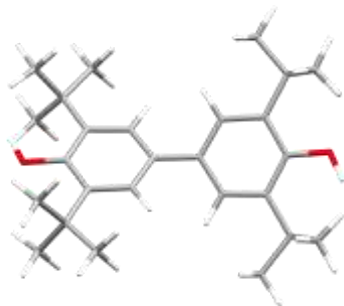

| <i>Element</i> | <i>X</i>  | <i>Y</i>  | <i>Z</i>  |
|----------------|-----------|-----------|-----------|
| C              | 2.662897  | 2.635551  | -3.183136 |
| C              | 2.538051  | 1.121147  | -2.891721 |
| C              | 1.469010  | 0.585322  | -3.861262 |
| C              | 3.847421  | 0.376822  | -3.247975 |
| C              | 2.155064  | 0.878132  | -1.415358 |
| C              | 0.956973  | 0.243967  | -1.092795 |
| C              | 0.559215  | 0.009379  | 0.219942  |
| C              | -0.722334 | -0.668444 | 0.520090  |
| C              | -1.172853 | -1.734636 | -0.256484 |
| C              | -2.371609 | -2.395565 | -0.009897 |
| C              | -2.822599 | -3.574235 | -0.895603 |
| C              | -1.811640 | -3.866588 | -2.018273 |
| C              | -2.948003 | -4.862310 | -0.053455 |
| C              | -4.169654 | -3.247047 | -1.576200 |
| C              | -3.139879 | -1.946543 | 1.083838  |
| O              | -4.319512 | -2.613755 | 1.309689  |
| C              | -2.729361 | -0.872609 | 1.900607  |
| C              | -3.575072 | -0.367724 | 3.090249  |
| C              | -4.952781 | 0.142874  | 2.605342  |
| C              | -2.908272 | 0.818243  | 3.810546  |
| C              | -3.737565 | -1.477093 | 4.157152  |
| C              | -1.517866 | -0.260109 | 1.586350  |
| C              | 1.405880  | 0.435279  | 1.241982  |
| C              | 2.615795  | 1.078171  | 1.002311  |
| C              | 3.519836  | 1.524575  | 2.168743  |
| C              | 4.885532  | 0.807965  | 2.095125  |
| C              | 3.717042  | 3.055887  | 2.136854  |
| C              | 2.903154  | 1.179655  | 3.535722  |
| C              | 2.975543  | 1.289444  | -0.344561 |
| O              | 4.174559  | 1.925329  | -0.558401 |
| H              | 2.932586  | 2.796142  | -4.229318 |
| H              | 3.405029  | 3.150219  | -2.572167 |
| H              | 1.708311  | 3.130182  | -2.997178 |
| H              | 1.328006  | -0.491373 | -3.757186 |
| H              | 0.505577  | 1.075460  | -3.715675 |
| H              | 1.785871  | 0.779110  | -4.887628 |
| H              | 4.101171  | 0.544927  | -4.296837 |

|   |           |           |           |
|---|-----------|-----------|-----------|
| H | 4.714843  | 0.673859  | -2.656391 |
| H | 3.720595  | -0.695912 | -3.094498 |
| H | 0.288126  | -0.061043 | -1.881672 |
| H | -0.542614 | -2.067767 | -1.065742 |
| H | -0.832500 | -4.147986 | -1.626233 |
| H | -2.177482 | -4.702050 | -2.617744 |
| H | -1.684333 | -3.013316 | -2.687379 |
| H | -3.240182 | -5.697840 | -0.694563 |
| H | -3.689984 | -4.761542 | 0.733758  |
| H | -1.988956 | -5.110427 | 0.406710  |
| H | -4.075208 | -2.352251 | -2.195647 |
| H | -4.468277 | -4.075015 | -2.224115 |
| H | -4.961223 | -3.079399 | -0.851208 |
| H | -4.749711 | -2.272131 | 2.095427  |
| H | -5.550355 | -0.605443 | 2.083947  |
| H | -5.541823 | 0.498455  | 3.453640  |
| H | -4.818354 | 0.973865  | 1.911182  |
| H | -1.934641 | 0.549162  | 4.222401  |
| H | -2.778308 | 1.675243  | 3.148507  |
| H | -3.541588 | 1.135941  | 4.640824  |
| H | -4.227701 | -2.383937 | 3.799350  |
| H | -4.325555 | -1.104966 | 4.998906  |
| H | -2.758901 | -1.781185 | 4.531506  |
| H | -1.181658 | 0.582547  | 2.169111  |
| H | 1.109559  | 0.228697  | 2.258148  |
| H | 5.508527  | 1.108796  | 2.941220  |
| H | 4.749838  | -0.274702 | 2.145139  |
| H | 5.418791  | 1.044556  | 1.178581  |
| H | 2.753986  | 3.565023  | 2.218080  |
| H | 4.201679  | 3.384332  | 1.221676  |
| H | 4.335029  | 3.367665  | 2.982659  |
| H | 2.763216  | 0.104648  | 3.663681  |
| H | 1.941873  | 1.674338  | 3.688068  |
| H | 3.575806  | 1.519219  | 4.325303  |
| H | 4.356785  | 1.984503  | -1.497792 |

B3LYP/def2TZVP (CPCM – DME)

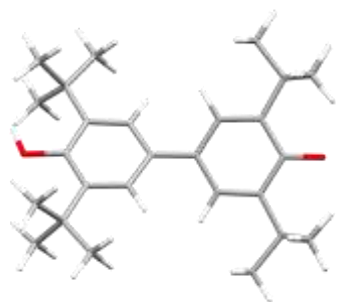

| <i>Element</i> | <i>X</i>  | <i>Y</i>  | <i>Z</i>  |
|----------------|-----------|-----------|-----------|
| C              | 2.793074  | 2.410200  | -3.268237 |
| C              | 2.644148  | 0.917851  | -2.902614 |
| C              | 1.632175  | 0.307274  | -3.886870 |
| C              | 3.989564  | 0.194197  | -3.126558 |
| C              | 2.210210  | 0.773917  | -1.432816 |
| C              | 1.015277  | 0.151457  | -1.105646 |
| C              | 0.558888  | -0.003623 | 0.210229  |
| C              | -0.721825 | -0.672814 | 0.512472  |
| C              | -1.228762 | -1.691299 | -0.302173 |
| C              | -2.433779 | -2.343008 | -0.053275 |
| C              | -2.934938 | -3.457647 | -0.995252 |
| C              | -1.970080 | -3.698590 | -2.169964 |
| C              | -3.057489 | -4.794303 | -0.232028 |
| C              | -4.297618 | -3.067145 | -1.608161 |
| C              | -3.158644 | -1.952283 | 1.091257  |
| O              | -4.349362 | -2.612727 | 1.318637  |
| C              | -2.698262 | -0.932910 | 1.950134  |
| C              | -3.491569 | -0.480162 | 3.196707  |
| C              | -4.880939 | 0.066845  | 2.792738  |
| C              | -2.783907 | 0.660044  | 3.951790  |
| C              | -3.626384 | -1.640778 | 4.211494  |
| C              | -1.488627 | -0.319292 | 1.626075  |
| C              | 1.378448  | 0.508679  | 1.225009  |
| C              | 2.586996  | 1.144342  | 0.984949  |
| C              | 3.441424  | 1.673552  | 2.150787  |
| C              | 4.820387  | 0.979716  | 2.155484  |
| C              | 3.631254  | 3.199644  | 2.012947  |
| C              | 2.799729  | 1.419396  | 3.525307  |
| C              | 3.059295  | 1.305043  | -0.379902 |
| O              | 4.169607  | 1.886031  | -0.641833 |
| H              | 3.128744  | 2.518785  | -4.304579 |
| H              | 3.512755  | 2.890342  | -2.609469 |
| H              | 1.831687  | 2.922170  | -3.171001 |
| H              | 1.492326  | -0.763040 | -3.718779 |
| H              | 0.655228  | 0.792042  | -3.824073 |
| H              | 1.999669  | 0.436316  | -4.907975 |
| H              | 4.322279  | 0.316755  | -4.162305 |
| H              | 4.749165  | 0.594420  | -2.459278 |
| H              | 3.880831  | -0.876582 | -2.933006 |
| H              | 0.380246  | -0.215199 | -1.900052 |
| H              | -0.637336 | -1.993496 | -1.151318 |
| H              | -0.984307 | -4.022598 | -1.831455 |
| H              | -2.375774 | -4.487271 | -2.806684 |
| H              | -1.845494 | -2.806873 | -2.786982 |
| H              | -3.391704 | -5.582131 | -0.912303 |

|   |           |           |           |
|---|-----------|-----------|-----------|
| H | -3.766063 | -4.727364 | 0.589284  |
| H | -2.086681 | -5.089533 | 0.173032  |
| H | -4.204365 | -2.140829 | -2.180024 |
| H | -4.636855 | -3.850832 | -2.290709 |
| H | -5.059157 | -2.924041 | -0.846155 |
| H | -4.704590 | -2.373870 | 2.177364  |
| H | -5.504118 | -0.652632 | 2.262252  |
| H | -5.430714 | 0.385091  | 3.681239  |
| H | -4.763252 | 0.931634  | 2.137293  |
| H | -1.798422 | 0.360892  | 4.311315  |
| H | -2.668974 | 1.549039  | 3.330357  |
| H | -3.383546 | 0.938482  | 4.820376  |
| H | -4.146345 | -2.522116 | 3.831822  |
| H | -4.175591 | -1.304598 | 5.093448  |
| H | -2.637549 | -1.974565 | 4.530403  |
| H | -1.127493 | 0.484740  | 2.246377  |
| H | 1.051897  | 0.371412  | 2.246476  |
| H | 5.443808  | 1.372304  | 2.965238  |
| H | 4.703025  | -0.096030 | 2.313021  |
| H | 5.327172  | 1.140600  | 1.206936  |
| H | 2.665293  | 3.708750  | 2.073051  |
| H | 4.092794  | 3.437855  | 1.057610  |
| H | 4.263493  | 3.581200  | 2.821149  |
| H | 2.665605  | 0.353720  | 3.724613  |
| H | 1.827339  | 1.908261  | 3.619683  |
| H | 3.449428  | 1.822068  | 4.306404  |

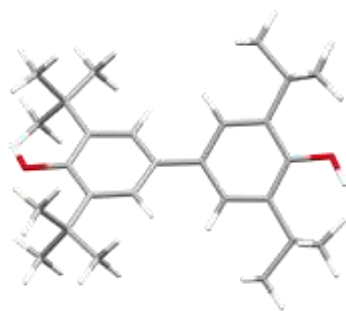

| <i>Element</i> | <i>X</i>  | <i>Y</i>  | <i>Z</i>  |
|----------------|-----------|-----------|-----------|
| C              | 2.673955  | 2.599470  | -3.201453 |
| C              | 2.554608  | 1.087831  | -2.894863 |
| C              | 1.491084  | 0.535153  | -3.861230 |
| C              | 3.869077  | 0.346361  | -3.237485 |
| C              | 2.166520  | 0.860555  | -1.416908 |
| C              | 0.968551  | 0.226064  | -1.092681 |
| C              | 0.561790  | 0.006261  | 0.221105  |
| C              | -0.720740 | -0.672070 | 0.521512  |

|   |           |           |           |
|---|-----------|-----------|-----------|
| C | -1.180510 | -1.726922 | -0.266410 |
| C | -2.380627 | -2.386690 | -0.019378 |
| C | -2.840923 | -3.550738 | -0.920454 |
| C | -1.837666 | -3.831176 | -2.053302 |
| C | -2.967495 | -4.851221 | -0.097618 |
| C | -4.189946 | -3.207843 | -1.589587 |
| C | -3.140970 | -1.949735 | 1.086367  |
| O | -4.320498 | -2.615050 | 1.309596  |
| C | -2.721350 | -0.886504 | 1.914222  |
| C | -3.557370 | -0.389783 | 3.114622  |
| C | -4.934800 | 0.132024  | 2.641656  |
| C | -2.878704 | 0.784947  | 3.842511  |
| C | -3.720494 | -1.509232 | 4.170663  |
| C | -1.509136 | -0.275036 | 1.598822  |
| C | 1.400384  | 0.448818  | 1.243761  |
| C | 2.610179  | 1.092944  | 1.002725  |
| C | 3.502275  | 1.559076  | 2.171358  |
| C | 4.872602  | 0.849275  | 2.119197  |
| C | 3.691319  | 3.091061  | 2.121718  |
| C | 2.876650  | 1.229156  | 3.538202  |
| C | 2.979452  | 1.288076  | -0.345341 |
| O | 4.176066  | 1.925773  | -0.557982 |
| H | 2.944099  | 2.746848  | -4.249017 |
| H | 3.417067  | 3.121225  | -2.598226 |
| H | 1.716846  | 3.092627  | -3.023295 |
| H | 1.355072  | -0.541090 | -3.745413 |
| H | 0.524930  | 1.023054  | -3.725552 |
| H | 1.812585  | 0.719460  | -4.887578 |
| H | 4.117865  | 0.498518  | -4.289499 |
| H | 4.736752  | 0.663984  | -2.657325 |
| H | 3.750368  | -0.724629 | -3.065261 |
| H | 0.308930  | -0.092083 | -1.884015 |
| H | -0.560178 | -2.050852 | -1.086947 |
| H | -0.857779 | -4.122945 | -1.670858 |
| H | -2.212010 | -4.656005 | -2.662174 |
| H | -1.709191 | -2.968620 | -2.709941 |
| H | -3.269627 | -5.674187 | -0.750116 |
| H | -3.702070 | -4.758609 | 0.697761  |
| H | -2.005667 | -5.112584 | 0.349675  |
| H | -4.092638 | -2.307453 | -2.200662 |
| H | -4.496753 | -4.027101 | -2.244571 |
| H | -4.976464 | -3.042594 | -0.858246 |
| H | -4.742331 | -2.297856 | 2.111373  |
| H | -5.541000 | -0.611024 | 2.123269  |
| H | -5.513808 | 0.483870  | 3.497835  |
| H | -4.800337 | 0.968511  | 1.953753  |
| H | -1.904292 | 0.506079  | 4.246200  |
| H | -2.748642 | 1.648427  | 3.188754  |

|   |           |           |           |
|---|-----------|-----------|-----------|
| H | -3.506661 | 1.095971  | 4.678966  |
| H | -4.230953 | -2.404226 | 3.811851  |
| H | -4.294079 | -1.136412 | 5.021419  |
| H | -2.741482 | -1.828751 | 4.531515  |
| H | -1.167673 | 0.557349  | 2.193013  |
| H | 1.098071  | 0.258732  | 2.261355  |
| H | 5.486878  | 1.167729  | 2.965106  |
| H | 4.742241  | -0.233263 | 2.187115  |
| H | 5.411288  | 1.073271  | 1.202438  |
| H | 2.724906  | 3.595409  | 2.194265  |
| H | 4.177340  | 3.411497  | 1.204178  |
| H | 4.304159  | 3.415682  | 2.966328  |
| H | 2.741753  | 0.155167  | 3.679348  |
| H | 1.911142  | 1.719501  | 3.676185  |
| H | 3.542034  | 1.583582  | 4.327409  |
| H | 4.378850  | 1.962630  | -1.495491 |
